# Supplementary material for: Translational control in the spinal cord regulates gene expression and pain hypersensitivity in the chronic phase of neuropathic pain
Source: bioRxiv preprint, doi:10.1101/2024.06.24.600539, version 2 (2026-01-11)
Supplement: Suppl. table 1 [file 600539_file02.xlsx]

## Sheet: 1-RiboSeq DRG Day4 SNI vs SHM
ensmusg	gene	mRNA_log2FC	RPF_log2FC	log2FC_TE_v1	pvalue_v1	DRG_sham_day4_log2TE	DRG_sni_day4_log2TE	log2FC_TE_v2	pvalue_v2	log2FC_TE_final	pvalue_final	pi_final	angle	category	ribo_DRG_sham_day4_103	ribo_DRG_sham_day4_104	ribo_DRG_sni_day4_101	ribo_DRG_sni_day4_102	mrna_DRG_sham_day4_103	mrna_DRG_sham_day4_104	mrna_DRG_sni_day4_101	mrna_DRG_sni_day4_102	TE_mlog10P
ENSMUSG00000027894	Slc6a17	0.18651	-0.340805	-0.527756	2.10901e-08	0.770125	0.24281	-0.527414	8.8209e-13	-0.527756	2.10901e-08	-4.05102	-61.3098	translation_only	4395.25	4280.23	3440.95	3378.18	2458.6	2549.71	2744.35	2916.76	-4.05102
ENSMUSG00000079598	Clec2l	0.122435	-0.596076	-0.719607	4.12044e-08	-1.21985	-1.93836	-0.718904	1.32851e-07	-0.718904	1.32851e-07	-4.94364	-78.3928	translation_only	1021.66	1094.22	613.608	765.854	2566.05	2272.01	2575.15	2657.52	-4.94364
ENSMUSG00000026825	Dnm1	0.19011	-0.2203	-0.410534	8.15059e-06	2.22436	1.81395	-0.410374	4.83317e-14	-0.410534	8.15059e-06	-2.08913	-49.2072	translation_only	17666.1	17844.1	14869	15428.6	4061.85	3411.57	4220.35	4251.12	-2.08913
ENSMUSG00000022415	Syngr1	0.17085	-0.275296	-0.446605	1.06938e-05	-0.594477	-1.04062	-0.446309	6.28948e-08	-0.446605	1.06938e-05	-2.22002	-58.176	translation_only	3037.3	3201.6	2501.89	2612.33	4916.21	4337.71	4899.17	5451.09	-2.22002
ENSMUSG00000035547	Capn5	0.137309	-0.292413	-0.430003	1.07306e-05	1.03083	0.601104	-0.429735	3.06726e-09	-0.430003	1.07306e-05	-2.13685	-64.8466	translation_only	4642.15	4872.54	3796.91	3916.02	2249.61	2327.7	2345.42	2655.45	-2.13685
ENSMUSG00000041544	Disp3	0.139978	-0.552697	-0.693738	1.66272e-05	2.97488	2.28221	-0.692828	3.52088e-11	-0.693738	1.66272e-05	-3.3155	-75.7879	translation_only	1802.8	1886.04	1172.97	1316.08	235.608	225.37	225.045	279.979	-3.3155
ENSMUSG00000037032	Apbb1	0.115156	-0.286283	-0.401702	2.97846e-05	1.17706	0.775622	-0.401529	6.16905e-09	-0.401702	2.97846e-05	-1.81811	-68.0878	translation_only	5589.3	5595.78	4420.69	4689.3	2529.25	2336.67	2489.54	2746.7	-1.81811
ENSMUSG00000045625	Pigz	0.122232	-0.584267	-0.708079	3.7247e-05	2.38946	1.68296	-0.706981	1.37894e-08	-0.708079	3.7247e-05	-3.13602	-78.1838	translation_only	1206.83	1225.15	739.042	864.993	227.721	228.734	216.017	277.905	-3.13602
ENSMUSG00000040659	Efhd2	-0.149157	0.458246	0.606238	2.35449e-05	-2.10786	-1.50046	0.607722	5.45568e-05	0.607722	5.45568e-05	2.59081	108.03	translation_only	525.727	501.906	691.58	713.805	2413.58	1950.96	1954.52	1956.54	2.59081
ENSMUSG00000034312	Iqsec1	-0.0139772	-0.450056	-0.4368	5.87122e-05	0.610378	0.174299	-0.436102	5.98086e-06	-0.4368	5.87122e-05	-1.84822	-91.7788	translation_only	2417.92	2456.53	1623.86	1908.44	1573.02	1567.12	1529.51	1559.59	-1.84822
ENSMUSG00000024661	Fth1	0.212903	-0.232669	-0.445946	6.89156e-05	-1.84499	-2.29056	-0.44557	1.45797e-08	-0.445946	6.89156e-05	-1.85588	-47.5399	translation_only	3803.54	3569.45	3034.14	3207.17	11891.5	14214	12928.6	17117.7	-1.85588
ENSMUSG00000028072	Ntrk1	0.0116085	-0.397656	-0.409435	7.02874e-05	0.749057	0.339792	-0.409328	6.44368e-09	-0.409435	7.02874e-05	-1.70043	-88.3279	translation_only	8220.07	8258.06	5800.46	6615.09	5280.63	4362.01	4480.51	5178.58	-1.70043
ENSMUSG00000052949	Rnf157	-0.0191588	-0.41805	-0.399489	7.9146e-05	-0.0227693	-0.42166	-0.399019	6.89755e-07	-0.399489	7.9146e-05	-1.63853	-92.624	translation_only	3522.58	3510.22	2518.84	2706.51	3429.95	3600.68	3190.76	3700.71	-1.63853
ENSMUSG00000023011	Faim2	0.0614321	-0.339317	-0.401387	0.000102183	0.0218396	-0.378909	-0.400725	5.25111e-06	-0.401387	0.000102183	-1.60179	-79.738	translation_only	2826.58	2986.49	2149.32	2401.66	2922.92	2702.2	2791.83	3039.95	-1.60179
ENSMUSG00000048385	Scrt1	0.105853	-0.505342	-0.613211	0.000122626	0.104432	-0.506763	-0.611758	3.48085e-05	-0.613211	0.000122626	-2.39853	-78.1694	translation_only	770.498	854.175	518.685	609.709	853.708	627.148	814.912	769.01	-2.39853
ENSMUSG00000026959	Grin1	0.0716167	-0.438723	-0.510965	0.000129263	2.43618	1.92584	-0.510331	3.02765e-12	-0.510965	0.000129263	-1.9869	-80.7289	translation_only	4965.67	4694.84	3522.31	3571.51	1043.64	713.11	989.129	845.745	-1.9869
ENSMUSG00000025579	Gaa	0.157027	-0.205676	-0.362915	0.000133642	1.97028	1.60758	-0.36274	7.82194e-10	-0.362915	0.000133642	-1.40595	-52.6395	translation_only	11776.7	12207.8	10505.9	10174.2	3261.7	2756.01	3254.96	3412.02	-1.40595
ENSMUSG00000007036	Abhd16a	0.221383	-0.230779	-0.452986	0.000187915	0.572161	0.119999	-0.452224	5.31747e-06	-0.452986	0.000187915	-1.68784	-46.1905	translation_only	1875.16	2060.62	1586.57	1732.47	1391.96	1204.96	1372.68	1636.32	-1.68784
ENSMUSG00000020978	Klhdc2	0.200506	-0.213425	-0.414457	0.000232584	0.761582	0.347651	-0.414047	5.25958e-07	-0.414457	0.000232584	-1.5059	-46.7876	translation_only	2973.44	2861.8	2484.94	2523.1	1559.22	1831.74	1758.56	2111.25	-1.5059
ENSMUSG00000030865	Chp2	0.195745	-0.500064	-0.698587	0.000241274	1.36497	0.669159	-0.696357	1.09406e-05	-0.698587	0.000241274	-2.52713	-68.6227	translation_only	670.461	645.307	491.564	438.693	227.721	275.826	242.434	330.583	-2.52713
ENSMUSG00000058297	Spock2	0.104047	-0.190187	-0.294269	0.000254212	0.463463	0.169229	-0.294244	3.76628e-09	-0.294269	0.000254212	-1.05784	-61.3178	translation_only	41792.1	40825.8	36213	35804.3	30356.9	28597.7	32577.7	30364.3	-1.05784
ENSMUSG00000013076	Amotl1	-0.163671	0.237899	0.400942	0.00030422	-0.882618	-0.481048	0.401462	9.72981e-05	0.400942	0.00030422	1.41004	124.527	translation_only	1355.82	1343.61	1596.74	1571.36	2481.93	2415.9	2235.07	2107.93	1.41004
ENSMUSG00000037736	Limch1	-0.1609	0.333745	0.493645	0.000310025	-1.43617	-0.941531	0.494576	0.000135147	0.493645	0.000310025	1.732	115.739	translation_only	857.765	757.534	1064.49	974.047	1991.66	2329.57	1726.8	2112.08	1.732
ENSMUSG00000049775	Tmsb4x	-0.0606534	0.267979	0.328481	0.000332748	-0.414488	-0.0858561	0.328689	2.15448e-09	0.328481	0.000332748	1.14242	102.753	translation_only	16648.7	16073.4	19191.4	19991.5	19732.6	23203.7	20326.3	20555	1.14242
ENSMUSG00000020150	Gamt	0.185803	-0.379724	-0.567139	0.000365736	1.69074	1.12521	-0.565802	8.87986e-06	-0.567139	0.000365736	-1.94916	-63.9271	translation_only	1081.25	1140.98	769.553	917.042	351.933	324.039	338.07	426.398	-1.94916
ENSMUSG00000003500	Impdh1	0.13255	-0.198462	-0.33127	0.000377313	-0.0423306	-0.373343	-0.331009	1.56843e-05	-0.33127	0.000377313	-1.13404	-56.2616	translation_only	4124.93	4264.64	3454.51	3797.05	4371.39	4121.69	4650.38	4598.3	-1.13404
ENSMUSG00000064210	Ano6	0.139758	0.520341	0.380158	0.000392056	-1.28067	-0.900083	0.380693	0.000158259	0.380158	0.000392056	1.29507	74.9658	translation_only	1453.73	1490.13	2234.08	1972.88	3633.35	3396.62	3943.14	3750.48	1.29507
ENSMUSG00000025959	Klf7	-0.151962	0.202592	0.35416	0.000502867	-3.03625	-2.6817	0.354631	8.4038e-05	0.35416	0.000502867	1.16821	126.873	translation_only	2105.04	2306.9	2593.43	2448.75	16822.5	18700.5	16480.1	15270.3	1.16821
ENSMUSG00000053477	Tcf4	-0.161088	0.358078	0.518174	0.000184792	-2.45489	-1.93573	0.519248	0.000508929	0.519248	0.000508929	1.71006	114.221	translation_only	595.965	592.311	833.965	689.02	3225.56	3185.45	2580.83	3115.44	1.71006
ENSMUSG00000046275	Tusc5	-0.0572217	-0.371688	-0.314799	0.000532688	-0.486997	-0.801463	-0.314578	5.3393e-06	-0.314799	0.000532688	-1.0305	-98.752	translation_only	5489.27	5542.78	4152.87	4317.53	7980.76	7226.04	7136.24	7383.57	-1.0305
ENSMUSG00000045009	Prrt3	-0.0966425	-0.586993	-0.491235	0.000541835	1.81144	1.32109	-0.490541	1.29568e-05	-0.491235	0.000541835	-1.60444	-99.3493	translation_only	2060.34	2094.91	1183.14	1549.06	649.318	514.277	549.739	531.753	-1.60444
ENSMUSG00000040111	Gramd1b	-0.00502441	-0.373039	-0.36846	0.000565075	0.77143	0.403415	-0.368026	4.19619e-05	-0.36846	0.000565075	-1.19672	-90.7717	translation_only	2666.95	2724.63	1939.14	2186.03	1596.35	1509.19	1567.63	1506.5	-1.19672
ENSMUSG00000028833	Ncdn	0.0412305	-0.29265	-0.333999	0.000601193	1.1774	0.843519	-0.333959	1.49299e-08	-0.333999	0.000601193	-1.07581	-81.9806	translation_only	24704.9	26470.1	20055.8	21458.8	12438.9	9807.14	11583	11162.3	-1.07581
ENSMUSG00000033478	Fam160b1	0.201004	-0.269628	-0.471723	0.000621186	1.12082	0.650189	-0.470831	8.96555e-05	-0.471723	0.000621186	-1.51271	-53.296	translation_only	1132.33	1218.91	915.327	1013.7	496.189	565.48	610.598	601.022	-1.51271
ENSMUSG00000029406	Pitpnm2	0.0573335	-0.267171	-0.324936	0.000670062	0.894394	0.56989	-0.324504	1.37473e-05	-0.324936	0.000670062	-1.03131	-77.8883	translation_only	3990.84	4043.3	3342.64	3296.39	2132.63	2118.4	2193.27	2200.43	-1.03131
ENSMUSG00000020802	Ube2o	0.115927	-0.204952	-0.321192	0.000683223	1.84356	1.52268	-0.320976	3.9514e-07	-0.321192	0.000683223	-1.01671	-60.5062	translation_only	7300.58	7513	6373.39	6399.46	2095.82	1962.55	2279.21	2089.27	-1.01671
ENSMUSG00000034570	Inpp5j	-0.0701749	-0.577367	-0.508521	0.000722574	2.24119	1.734	-0.507356	2.64434e-06	-0.508521	0.000722574	-1.59733	-96.9299	translation_only	1628.26	1574.3	1071.27	1065.75	359.162	307.594	308.978	322.287	-1.59733
ENSMUSG00000038319	Kcnh2	0.0579672	-0.337045	-0.39598	0.000733483	0.276195	-0.118817	-0.395216	5.43293e-05	-0.39598	0.000733483	-1.24124	-80.2414	translation_only	1873.03	1932.8	1471.3	1519.31	1687.37	1400.43	1589.36	1604.8	-1.24124
ENSMUSG00000053693	Mast1	0.156511	-0.23368	-0.390518	0.000775864	3.32818	2.93799	-0.390315	5.4784e-09	-0.390518	0.000775864	-1.2146	-56.1871	translation_only	5955.4	5842.06	5037.69	4947.07	620.401	535.207	644.038	635.864	-1.2146
ENSMUSG00000032135	Mcam	-0.0997618	0.253465	0.352891	0.000790522	0.0261327	0.37936	0.353311	6.92666e-08	0.352891	0.000790522	1.0947	111.484	translation_only	5323.25	5240.39	6258.12	6268.1	5609.24	4597.47	4965.04	4498.34	1.0947
ENSMUSG00000030611	Mrps11	0.156882	-0.610005	-0.77103	0.00080376	1.48068	0.713796	-0.768078	0.000193459	-0.77103	0.00080376	-2.38624	-75.5771	translation_only	387.378	370.974	244.087	250.328	141.299	126.327	156.161	140.197	-2.38624
ENSMUSG00000007950	Abhd8	0.201238	-0.283387	-0.486015	0.000855343	0.5212	0.0365749	-0.484859	0.00013731	-0.486015	0.000855343	-1.49103	-54.6208	translation_only	1032.3	1165.92	830.574	951.741	844.507	655.927	799.53	915.429	-1.49103
ENSMUSG00000025326	Ube3a	-0.122519	0.237405	0.359452	0.000878402	-0.939409	-0.579485	0.359879	2.88651e-05	0.359452	0.000878402	1.0986	117.297	translation_only	2630.76	2490.82	3159.57	2865.14	4392.75	5287.78	4313.31	4516.59	1.0986
ENSMUSG00000020701	Tmem132e	0.0849596	-0.260852	-0.346007	0.00098708	2.02336	1.67755	-0.345805	2.78475e-06	-0.346007	0.00098708	-1.03997	-71.9595	translation_only	5059.32	5346.39	4112.19	4500.94	1211.88	1304.38	1244.94	1406.12	-1.03997
ENSMUSG00000066148	Prpf4	0.0769717	-0.576571	-0.656015	0.00072831	0.352521	-0.301022	-0.654499	0.00102293	-0.654499	0.00102293	-1.95705	-82.396	translation_only	421.433	408.383	247.477	302.376	306.914	333.383	325.697	345.101	-1.95705
ENSMUSG00000063410	Stk24	0.0347765	-0.376351	-0.412029	0.00130502	1.20867	0.797543	-0.41138	4.31666e-05	-0.412029	0.00130502	-1.18845	-84.7206	translation_only	2088.01	1945.27	1444.18	1640.76	761.7	959.41	854.035	896.349	-1.18845
ENSMUSG00000030207	Fam234b	0.112517	-0.222402	-0.335608	0.00140897	0.357454	0.022535	-0.335094	0.000217346	-0.335608	0.00140897	-0.956852	-63.1644	translation_only	2490.28	2571.88	2278.15	2044.75	1998.56	1885.18	2142.44	2028.3	-0.956852
ENSMUSG00000069662	Marcks	0.121194	0.447596	0.326191	0.00153454	-1.24486	-0.918456	0.326444	0.00125801	0.326191	0.00153454	0.917909	74.8495	translation_only	2305.11	2924.15	3335.86	3715.26	6032.15	6107.78	6615.26	6499.25	0.917909
ENSMUSG00000042303	Sgsm3	0.2404	-0.330636	-0.573059	0.00153965	2.25431	1.68328	-0.571448	2.61393e-05	-0.573059	0.00153965	-1.61177	-53.9796	translation_only	874.792	872.879	650.899	726.198	193.875	166.318	201.972	221.08	-1.61177
ENSMUSG00000027457	Snph	0.0789883	-0.270422	-0.350035	0.00174977	0.447212	0.0978013	-0.349627	0.000390052	-0.350035	0.00174977	-0.965053	-73.7173	translation_only	1792.15	1833.05	1495.03	1492.05	1289.43	1324.94	1336.9	1406.12	-0.965053
ENSMUSG00000061518	Cox5b	0.0725891	-0.349717	-0.423724	0.00184678	-0.42951	-0.851816	-0.422487	0.00180858	-0.423724	0.00184678	-1.15829	-78.2739	translation_only	896.077	847.94	667.85	693.977	1233.9	1080.5	1205.48	1212.83	-1.15829
ENSMUSG00000029359	Tesc	-0.234815	-0.790992	-0.557815	0.000839838	-0.650302	-1.20648	-0.557211	0.00193794	-0.557211	0.00193794	-1.51152	-106.534	translation_only	647.048	573.606	294.939	401.516	914.828	976.976	757.062	839.938	-1.51152
ENSMUSG00000028931	Kcnab2	-0.0450761	-0.371834	-0.326971	0.00195791	0.167726	-0.159032	-0.326759	5.41025e-08	-0.326971	0.00195791	-0.885505	-96.912	translation_only	9788.73	9950.82	7634.5	7534.61	9961.9	7315.36	8199.27	8442.1	-0.885505
ENSMUSG00000024335	Brd2	-0.0691032	0.280033	0.348502	0.00207055	-0.49514	-0.146004	0.349117	0.000200892	0.348502	0.00207055	0.935349	103.862	translation_only	1732.56	1670.94	2027.28	2084.41	2436.58	2288.08	2406.28	2066.87	0.935349
ENSMUSG00000020926	Adam11	0.0679519	-0.263733	-0.332206	0.0022067	0.561712	0.230027	-0.331704	2.65457e-05	-0.332206	0.0022067	-0.882425	-75.5518	translation_only	3516.2	3354.35	2830.73	2865.14	2531.55	2051.5	2461.45	2312.01	-0.882425
ENSMUSG00000069806	Cacng7	0.19453	-0.326653	-0.522506	0.000457327	-2.24401	-2.76519	-0.521794	0.00231995	-0.521794	0.00231995	-1.37468	-59.2251	translation_only	495.928	548.667	416.982	408.951	2334.39	2517.19	2766.08	2747.53	-1.37468
ENSMUSG00000015340	Cybb	-0.119296	0.627056	0.743752	0.00141713	-0.330098	0.416254	0.746856	0.00238763	0.746856	0.00238763	1.95828	100.772	translation_only	174.533	196.398	328.84	242.892	249.08	207.056	195.285	222.324	1.95828
ENSMUSG00000039156	Stim2	-0.0526294	0.372708	0.424174	0.00240945	-0.0605028	0.364835	0.425465	0.000995783	0.424174	0.00240945	1.11052	98.0375	translation_only	783.269	732.595	1000.08	959.176	724.567	835.326	764.753	728.361	1.11052
ENSMUSG00000006675	P4htm	0.140235	-0.276985	-0.418192	0.00252497	1.89444	1.47722	-0.417272	6.77428e-05	-0.418192	0.00252497	-1.08636	-63.1473	translation_only	1589.95	1611.71	1254.34	1365.65	445.584	401.031	438.387	489.031	-1.08636
ENSMUSG00000034245	Hdac11	0.0702494	-0.338659	-0.410013	0.0025363	0.201974	-0.206934	-0.409177	0.000907018	-0.410013	0.0025363	-1.06431	-78.2811	translation_only	1079.12	1225.15	891.596	912.085	1077.49	884.661	988.126	1059.36	-1.06431
ENSMUSG00000040520	Manea	-0.0923218	0.378219	0.469264	0.00169496	-0.796348	-0.325807	0.47061	0.00279626	0.47061	0.00279626	1.20167	103.717	translation_only	506.571	461.379	637.339	619.623	791.274	869.337	765.422	781.454	1.20167
ENSMUSG00000027309	4930402H24Rik	-0.125572	0.277799	0.402492	0.0016602	-1.72646	-1.32309	0.403345	0.00296309	0.403345	0.00296309	1.01976	114.324	translation_only	696.003	682.716	830.574	832.773	2203.93	2288.46	2130.74	1958.61	1.01976
ENSMUSG00000059734	Ndufs8	0.182675	-0.222344	-0.405656	0.00310487	2.82227	2.41725	-0.405046	7.57165e-06	-0.405656	0.00310487	-1.01737	-50.594	translation_only	2324.27	2444.06	1949.31	2101.76	324.987	337.494	355.458	391.556	-1.01737
ENSMUSG00000032523	Hhatl	-0.0543065	-0.53049	-0.478125	0.00320237	1.1731	0.696917	-0.476632	0.000646358	-0.478125	0.00320237	-1.1927	-95.845	translation_only	868.407	875.997	569.537	627.058	396.623	364.03	333.388	394.875	-1.1927
ENSMUSG00000048163	Selplg	0.0925283	1.12737	1.02915	0.00328921	0.127228	1.16207	1.03801	0.00116762	1.02915	0.00328921	2.55529	85.308	translation_only	76.6241	90.4053	189.846	171.016	94.3088	54.5672	72.2285	85.8603	2.55529
ENSMUSG00000007030	Vwa7	-0.00456846	-0.338453	-0.334496	0.00331319	1.27714	0.943258	-0.334012	0.000106637	-0.334496	0.00331319	-0.829468	-90.7733	translation_only	2658.43	2652.93	2057.79	2116.63	1152.74	1002.76	1096.13	1038.62	-0.829468
ENSMUSG00000030337	Vamp1	-0.180871	-0.45949	-0.279159	0.00346816	-1.47533	-1.75395	-0.278627	0.000500351	-0.279159	0.00346816	-0.686703	-111.486	translation_only	4222.84	3871.84	2837.51	3018.8	10522.5	11664.7	9437.86	10000.4	-0.686703
ENSMUSG00000062785	Kcnc3	-0.19398	-0.574091	-0.380977	0.00376184	0.656567	0.276456	-0.380346	0.000214328	-0.380977	0.00376184	-0.923716	-108.67	translation_only	1881.55	1957.74	1210.27	1343.34	1364.36	1027.81	1024.57	1053.97	-0.923716
ENSMUSG00000029304	Spp1	-0.0600867	0.279746	0.339585	0.00379942	1.22365	1.56348	0.339893	6.60252e-07	0.339585	0.00379942	0.821891	102.122	translation_only	5046.55	4797.72	6041.16	5861.63	1779.05	2375.17	1977.59	1978.11	0.821891
ENSMUSG00000042210	Abhd14a	0.106097	-0.643583	-0.753147	0.00112727	-0.711685	-1.46137	-0.751323	0.00384226	-0.751323	0.00384226	-1.81476	-80.6387	translation_only	236.258	246.277	135.604	168.537	415.682	360.293	388.563	441.745	-1.81476
ENSMUSG00000034336	Ina	-0.0688035	0.392665	0.460333	0.00389017	0.701541	1.16301	0.461409	0.000166157	0.460333	0.00389017	1.10942	99.9386	translation_only	902.462	1072.39	1213.66	1343.34	509.99	678.726	508.609	616.784	1.10942
ENSMUSG00000040820	Hlcs	0.0993336	-0.430906	-0.532026	0.00402949	1.62267	1.09243	-0.530635	0.000802606	-0.532026	0.00402949	-1.27407	-77.0188	translation_only	713.03	701.421	447.493	587.402	208.334	244.057	227.052	254.263	-1.27407
ENSMUSG00000018845	Unc45b	0.0619162	1.81344	1.7438	7.1699e-05	-2.80273	-1.05121	1.76974	0.00424038	1.76974	0.00424038	4.19887	88.0445	translation_only	17.0276	15.5871	57.6317	57.0053	138.013	86.7094	103.327	130.242	4.19887
ENSMUSG00000032046	Abhd12	0.00466287	-0.296584	-0.301681	0.00428348	0.803041	0.501794	-0.301378	8.40663e-05	-0.301681	0.00428348	-0.714441	-89.0993	translation_only	4218.58	4086.95	3217.2	3499.63	2247.97	2439.45	2119.37	2551.75	-0.714441
ENSMUSG00000058975	Kcnc1	-0.0886118	-0.502815	-0.41579	0.00432341	-0.0363191	-0.450522	-0.414526	0.00354389	-0.41579	0.00432341	-0.982999	-99.9947	translation_only	908.847	798.061	603.438	599.795	850.422	879.054	745.358	870.632	-0.982999
ENSMUSG00000062127	Cttnbp2nl	-0.165897	0.294744	0.459273	0.0043265	0.0415805	0.502222	0.460555	0.00159268	0.459273	0.0043265	1.08566	119.373	translation_only	617.25	598.546	688.19	790.639	516.562	647.705	491.221	539.22	1.08566
ENSMUSG00000026748	Plxdc2	-0.165186	0.303251	0.467354	0.00443416	1.03549	1.50393	0.468633	0.000789751	0.467354	0.00443416	1.09977	118.578	translation_only	757.728	779.356	1057.71	837.73	354.89	382.344	309.312	343.856	1.09977
ENSMUSG00000031425	Plp1	-0.136659	0.21617	0.352521	0.00454628	0.598362	0.951191	0.352911	1.96108e-07	0.352521	0.00454628	0.825727	122.3	translation_only	5631.87	5938.7	6454.75	6885.25	3281.09	4233.81	2926.59	3861.23	0.825727
ENSMUSG00000039633	Lonrf1	0.0194007	0.396117	0.375699	0.00384904	-0.869978	-0.493261	0.376796	0.0046808	0.376796	0.0046808	0.877815	87.1961	translation_only	687.489	692.069	891.596	912.085	1201.7	1278.59	1259.99	1236.47	0.877815
ENSMUSG00000027254	Map1a	0.0334998	-0.196558	-0.230165	0.00472672	3.06889	2.83884	-0.230119	3.37627e-06	-0.230165	0.00472672	-0.535235	-80.3279	translation_only	84484.5	81972.7	73188.9	71261.6	10030.2	9486.84	9615.76	10227.8	-0.535235
ENSMUSG00000028004	Npy2r	-0.0941303	0.32706	0.420164	0.00474448	0.193704	0.614895	0.421191	0.00293296	0.420164	0.00474448	0.976382	106.056	translation_only	608.736	682.716	772.943	827.816	551.394	554.641	509.947	519.31	0.976382
ENSMUSG00000027463	Slc52a3	0.153477	-1.02822	-1.18889	0.00101453	-0.876045	-2.05774	-1.18783	0.00485793	-1.18783	0.00485793	-2.74811	-81.5105	translation_only	87.2664	121.58	54.2416	47.0913	166.93	206.309	200.969	211.125	-2.74811
ENSMUSG00000023328	Ache	0.157017	-0.451489	-0.609365	0.00504262	1.45678	0.848277	-0.60869	5.83375e-13	-0.609365	0.00504262	-1.39992	-70.8235	translation_only	3637.52	3980.95	2610.38	2907.27	1659.11	1064.81	1525.16	1493.64	-1.39992
ENSMUSG00000041729	Coro2b	0.0172557	-0.258124	-0.275785	0.00536288	0.466543	0.191163	-0.275521	0.000415019	-0.275785	0.00536288	-0.626198	-86.1754	translation_only	3614.1	3856.26	3088.38	3112.98	2793.45	2516.44	2638.68	2700.25	-0.626198
ENSMUSG00000041957	Pkp2	-0.0914172	1.335	1.41567	0.00541398	0.316196	1.74262	1.43364	0.00169935	1.41567	0.00541398	3.20859	93.9173	translation_only	38.3121	34.2917	91.5327	91.7042	25.631	32.1423	30.0952	23.6427	3.20859
ENSMUSG00000041351	Rap1gap	0.0506696	-0.33157	-0.38298	0.00545777	1.67418	1.29194	-0.382388	7.62323e-05	-0.38298	0.00545777	-0.866677	-81.3114	translation_only	2202.94	2004.5	1623.86	1705.2	719.638	580.056	742.014	595.215	-0.866677
ENSMUSG00000030208	Emp1	-0.0426116	0.56325	0.603889	0.00117847	-1.8747	-1.26884	0.606598	0.00566544	0.606598	0.00566544	1.36288	94.3264	translation_only	225.615	221.337	305.109	349.467	883.939	729.182	754.052	802.608	1.36288
ENSMUSG00000003279	Dlgap1	-0.0985136	0.290134	0.387459	0.00446672	-1.5304	-1.14175	0.388717	0.00569471	0.388717	0.00569471	0.872486	108.755	translation_only	644.92	626.603	783.113	765.854	1705.44	1913.21	1571.64	1785.23	0.872486
ENSMUSG00000023017	Asic1	-0.167086	-0.515823	-0.34986	0.00572528	-0.086098	-0.434835	-0.349165	0.00428523	-0.34986	0.00572528	-0.784457	-107.948	translation_only	1172.77	1175.27	786.503	842.687	1198.74	1253.55	1069.72	1099.59	-0.784457
ENSMUSG00000022212	Cpne6	0.104523	-0.177082	-0.281849	0.00592078	2.06716	1.78555	-0.281681	1.46069e-06	-0.281849	0.00592078	-0.627853	-59.4489	translation_only	10354.9	10415.3	9021.06	9239.81	2718.85	2155.03	2540.37	2667.06	-0.627853
ENSMUSG00000078485	Plekhn1	0.152821	-0.318546	-0.473118	0.00594474	1.10558	0.634216	-0.471919	0.00315298	-0.473118	0.00594474	-1.0531	-64.3708	translation_only	600.222	673.364	545.806	470.913	294.427	285.543	314.997	325.606	-1.0531
ENSMUSG00000070283	Ndufaf3	0.096585	-0.42659	-0.525848	0.00545197	0.0123178	-0.510857	-0.523853	0.00629922	-0.523853	0.00629922	-1.15285	-77.2427	translation_only	444.846	395.913	315.279	309.811	424.225	399.162	386.222	489.031	-1.15285
ENSMUSG00000005982	Naa60	0.204111	-0.467104	-0.673241	0.00119175	-1.81345	-2.48467	-0.672151	0.00649588	-0.672151	0.00649588	-1.47024	-66.396	translation_only	300.111	227.572	206.796	178.451	889.197	953.056	998.492	1109.55	-1.47024
ENSMUSG00000005952	Trpv1	0.0748622	-0.213138	-0.288388	0.00655444	0.961663	0.673663	-0.288138	0.000301384	-0.288388	0.00655444	-0.629685	-70.6468	translation_only	3209.7	3348.12	2803.61	2815.57	1533.26	1777.17	1670.62	1791.87	-0.629685
ENSMUSG00000022180	Slc7a8	-0.0279456	0.381959	0.408547	0.00658611	-0.199461	0.210443	0.409946	0.00299982	0.408547	0.00658611	0.891194	94.1845	translation_only	715.159	676.481	979.739	835.251	865.209	709.373	817.587	716.747	0.891194
ENSMUSG00000022661	Cd200	-0.0304952	0.293996	0.323702	0.00687173	-0.572951	-0.24846	0.324531	0.00129283	0.323702	0.00687173	0.700146	95.9219	translation_only	1494.17	1384.14	1769.63	1749.81	2197.03	2025.71	2242.76	1863.63	0.700146
ENSMUSG00000099083	Atf7	0.150202	-0.755903	-0.909394	0.000957672	-2.33566	-3.24176	-0.909404	0.00696973	-0.909404	0.00696973	-1.96139	-78.7614	translation_only	155.377	137.167	74.5822	96.6611	686.778	772.91	804.545	803.852	-1.96139
ENSMUSG00000052534	Pbx1	-0.0938216	0.349501	0.442167	0.0014465	-3.18454	-2.74122	0.443564	0.00707062	0.443564	0.00707062	0.953903	105.026	translation_only	453.359	467.614	630.559	540.311	4211.69	4015.17	3768.92	3889.02	0.953903
ENSMUSG00000053552	Ebf4	0.112098	-0.604582	-0.721444	0.00407194	0.121606	-0.595074	-0.718023	0.00747102	-0.718023	0.00747102	-1.52696	-79.4959	translation_only	221.359	230.69	169.505	128.882	209.648	198.46	236.749	201.17	-1.52696
ENSMUSG00000039953	Clstn1	0.0394955	-0.191938	-0.231423	0.00755295	2.09152	1.86009	-0.231486	1.7242e-05	-0.231423	0.00755295	-0.491052	-78.3724	translation_only	18713.3	19128.5	16245.4	16682.7	4471.95	4261.47	4251.79	4665.08	-0.491052
ENSMUSG00000019528	Gyg	-0.109904	-0.423627	-0.314206	0.00791837	1.20907	0.895353	-0.313882	3.41226e-05	-0.314206	0.00791837	-0.660261	-104.544	translation_only	4222.84	4451.68	3149.4	3269.13	1619.02	2070.19	1521.15	1873.58	-0.660261
ENSMUSG00000039529	Atp8b1	0.0145728	1.20259	1.18193	0.00226386	-0.769383	0.418635	1.19372	0.00809524	1.19372	0.00809524	2.49698	89.3057	translation_only	36.1836	52.9962	128.824	74.3547	83.7935	62.7896	74.2349	73.002	2.49698
ENSMUSG00000074406	Zfp628	0.279434	-0.428583	-0.713333	0.00816421	0.960175	0.252158	-0.709445	0.0064526	-0.713333	0.00816421	-1.4895	-56.8959	translation_only	240.515	202.633	166.115	163.58	128.812	96.4269	141.113	130.657	-1.4895
ENSMUSG00000031939	Taf1d	-0.29521	1.12106	1.41032	0.000499421	-2.1563	-0.740023	1.42448	0.00862082	1.42448	0.00862082	2.94077	104.753	translation_only	34.0552	21.822	64.4119	59.4838	117.311	133.428	107.34	95.4004	2.94077
ENSMUSG00000002504	Slc9a3r2	-0.00936264	-0.333364	-0.324787	0.00885773	1.30479	0.980792	-0.324231	0.00131686	-0.324787	0.00885773	-0.666684	-91.6087	translation_only	1762.36	1876.69	1389.94	1472.22	752.17	694.049	693.193	734.583	-0.666684
ENSMUSG00000042115	Klhdc8a	0.0979611	-0.738558	-0.840159	0.00163928	-1.67479	-2.51131	-0.839518	0.00887488	-0.839518	0.00887488	-1.72255	-82.4445	translation_only	163.891	158.989	81.3624	109.054	528.392	486.619	534.357	545.027	-1.72255
ENSMUSG00000003657	Calb2	0.13113	-1.13214	-1.2759	0.008984	0.477279	-0.785993	-1.26611	1.58961e-06	-1.2759	0.008984	-2.61116	-83.3932	translation_only	302.24	274.333	101.703	156.145	102.524	306.847	235.077	209.466	-2.61116
ENSMUSG00000000632	Sez6	0.042189	-0.280448	-0.323538	0.00907637	1.05528	0.732645	-0.322647	0.00106808	-0.323538	0.00907637	-0.660692	-81.4449	translation_only	1809.18	1798.75	1474.69	1479.66	925.015	782.627	852.363	895.104	-0.660692
ENSMUSG00000038776	Ephx1	-0.161854	-0.468652	-0.307293	0.00918213	1.21096	0.904157	-0.306834	0.000161842	-0.307293	0.00918213	-0.625973	-109.053	translation_only	3275.68	3326.29	2390.02	2354.57	1486.27	1317.83	1104.16	1387.04	-0.625973
ENSMUSG00000021803	Cdhr1	-0.0300015	0.314321	0.343342	0.00918501	0.0683118	0.412634	0.344226	0.00431441	0.343342	0.00918501	0.699361	95.4523	translation_only	949.288	919.641	1217.05	1102.93	918.443	836.821	874.099	833.716	0.699361
ENSMUSG00000063450	Syne2	-0.112261	0.333502	0.445	0.00938991	1.89682	2.34258	0.445944	0.000362165	0.445	0.00938991	0.902167	108.604	translation_only	1128.08	1041.22	1528.93	1209.5	282.269	292.271	288.58	238.916	0.902167
ENSMUSG00000047141	Zfp654	-0.206833	0.351043	0.555338	0.00980133	0.575944	1.13382	0.558155	0.00397173	0.555338	0.00980133	1.11551	120.506	translation_only	308.625	317.977	416.982	379.209	191.246	222.006	166.527	189.142	1.11551
ENSMUSG00000004748	Mtfp1	-0.0873521	-0.978486	-0.895276	0.00292749	-0.517803	-1.40894	-0.894657	0.0101467	-0.894657	0.0101467	-1.78365	-95.1014	translation_only	153.248	218.22	54.2416	126.403	273.068	245.178	244.106	240.575	-1.78365
ENSMUSG00000006005	Tpr	-0.191661	0.179986	0.371544	0.0103645	3.29827	3.66992	0.371693	1.63349e-06	0.371544	0.0103645	0.737313	136.799	translation_only	4141.96	4021.48	4871.57	4347.27	375.592	441.77	377.528	332.657	0.737313
ENSMUSG00000010080	Epn3	0.083318	-0.287677	-0.372492	0.0108743	0.804514	0.433519	-0.371361	0.00529485	-0.372492	0.0108743	-0.731425	-73.8477	translation_only	957.802	910.288	701.751	815.424	560.266	493.347	560.774	548.345	-0.731425
ENSMUSG00000050377	Il31ra	0.0104302	0.368541	0.357218	0.0114319	0.0135352	0.371646	0.358166	0.0045488	0.357218	0.0114319	0.693675	88.3789	translation_only	904.59	819.883	1183.14	1045.92	864.223	822.245	928.939	757.811	0.693675
ENSMUSG00000026883	Dab2ip	-0.0712874	-0.380278	-0.309997	0.0115284	0.0132761	-0.295715	-0.309127	0.00508946	-0.309997	0.0115284	-0.600846	-100.618	translation_only	1457.99	1402.84	1115.34	1075.67	1498.43	1292.79	1337.57	1302.01	-0.600846
ENSMUSG00000026395	Ptprc	-0.140662	0.522869	0.660869	0.0115365	1.02655	1.69008	0.663798	0.00256503	0.660869	0.0115365	1.28071	105.057	translation_only	270.313	268.099	467.834	309.811	152.143	107.639	121.05	113.236	1.28071
ENSMUSG00000046387	Pcdhb17	-0.175033	0.432967	0.605751	0.00567352	-0.454409	0.153591	0.608158	0.0116459	0.608158	0.0116459	1.17607	112.012	translation_only	183.047	240.042	315.279	250.328	281.941	282.179	260.491	235.597	1.17607
ENSMUSG00000035493	Tgfbi	-0.0916032	0.181651	0.272967	0.0122299	1.53621	1.80946	0.273335	0.000177449	0.272967	0.0122299	0.52207	116.761	translation_only	4114.29	4342.57	4885.13	4649.65	1523.07	1341.38	1293.76	1377.5	0.52207
ENSMUSG00000004892	Bcan	0.00425756	-0.278836	-0.283436	0.0122401	1.18216	0.899068	-0.283132	0.00142596	-0.283436	0.0122401	-0.541991	-89.1252	translation_only	3165	3469.69	2515.45	2897.36	1559.87	1310.36	1422.5	1438.06	-0.541991
ENSMUSG00000058440	Nrf1	-0.0266203	0.59528	0.619785	0.00318867	-1.28268	-0.660777	0.622874	0.013105	0.622874	0.013105	1.1726	92.5605	translation_only	191.56	146.519	264.428	250.328	424.225	394.304	391.572	406.903	1.1726
ENSMUSG00000040359	Ufl1	-0.13883	0.318763	0.456503	0.0131783	1.83525	2.29284	0.457738	0.000623032	0.456503	0.0131783	0.858291	113.534	translation_only	838.609	698.303	945.838	971.568	208.334	218.269	197.625	187.068	0.858291
ENSMUSG00000017639	Rab11fip4	0.0856692	-0.323361	-0.410388	0.00454576	-2.08975	-2.49878	-0.409363	0.0132265	-0.409363	0.0132265	-0.769011	-75.1613	translation_only	644.92	573.606	427.153	537.833	2586.76	2535.5	2733.31	2665.82	-0.769011
ENSMUSG00000020044	Timp3	-0.0556401	0.182479	0.237712	0.0134624	-1.05789	-0.819771	0.23806	0.00168404	0.237712	0.0134624	0.44473	106.957	translation_only	3411.9	3279.53	3712.16	3841.66	7171.08	6546.94	6393.56	6719.09	0.44473
ENSMUSG00000042302	Ehbp1	-0.0304461	0.288693	0.31851	0.0138208	0.383305	0.702444	0.319207	0.00235189	0.31851	0.0138208	0.592258	96.0203	translation_only	1377.11	1271.91	1654.37	1576.32	951.96	1052.1	1059.35	888.468	0.592258
ENSMUSG00000032890	Rims3	-0.0982118	-0.41921	-0.322218	0.00965851	-1.71379	-2.03479	-0.321183	0.0143559	-0.321183	0.0143559	-0.59193	-103.185	translation_only	940.774	1016.28	708.531	741.069	3170.35	3129.39	3015.21	2830.07	-0.59193
ENSMUSG00000074657	Kif5a	0.0603783	-0.156375	-0.216804	0.0145635	3.14876	2.932	-0.216785	2.92048e-05	-0.216804	0.0145635	-0.398212	-68.8879	translation_only	27533.6	28409.1	25008.8	24896.4	3245.93	2957.84	3326.86	3099.27	-0.398212
ENSMUSG00000001663	Gstt1	0.104548	-0.359742	-0.467019	0.014699	0.615405	0.151115	-0.464779	0.0119767	-0.467019	0.014699	-0.85591	-73.7951	translation_only	464.002	423.97	328.84	359.381	301.657	270.22	281.557	329.753	-0.85591
ENSMUSG00000032194	Kank2	-0.00371729	0.40085	0.403031	0.0157128	0.164985	0.569553	0.404902	0.0141332	0.403031	0.0157128	0.726966	90.5313	translation_only	421.433	536.197	623.778	622.101	419.953	412.617	429.358	395.289	0.726966
ENSMUSG00000102440	Pcdhga9	-0.139872	0.494724	0.633392	0.00120503	-5.20533	-4.57074	0.635369	0.0157739	0.635369	0.0157739	1.14497	105.787	translation_only	183.047	137.167	237.307	218.107	6019.33	5746.37	5377.35	5230.01	1.14497
ENSMUSG00000006342	Susd2	-0.103144	-0.332351	-0.22929	0.0160317	2.94009	2.71089	-0.229268	2.01142e-05	-0.22929	0.0160317	-0.41158	-107.242	translation_only	21686.8	22161.8	16977.6	17636.9	2650.83	2970.92	2407.62	2790.67	-0.41158
ENSMUSG00000020747	Tmem94	0.0425479	-0.270593	-0.314117	0.0161672	0.402063	0.0889223	-0.313399	0.00936209	-0.314117	0.0161672	-0.562699	-81.064	translation_only	1181.29	1081.75	925.497	944.305	869.481	820.002	901.185	827.08	-0.562699
ENSMUSG00000021460	Auh	0.0198483	-0.269028	-0.289766	0.0165584	0.331075	0.0421986	-0.289083	0.00753648	-0.289766	0.0165584	-0.516068	-85.7805	translation_only	1430.32	1465.19	1159.41	1224.37	1106.73	1156.38	1078.08	1201.22	-0.516068
ENSMUSG00000035776	Cd99l2	-0.00518565	-0.272664	-0.268375	0.0166042	-1.37225	-1.63973	-0.267575	0.0154878	-0.268375	0.0166042	-0.477649	-91.0895	translation_only	1413.29	1334.26	1122.12	1142.58	3446.71	3564.43	3344.92	3594.11	-0.477649
ENSMUSG00000025239	Limd1	-0.0818182	0.456288	0.536332	0.0027064	-2.75304	-2.21493	0.538669	0.0166315	0.538669	0.0166315	0.958328	100.166	translation_only	236.258	205.75	284.768	319.725	1523.07	1425.47	1346.93	1421.05	0.958328
ENSMUSG00000024901	Peli3	0.123652	-0.441993	-0.568454	0.0173871	2.84976	2.28412	-0.566168	0.000665751	-0.568454	0.0173871	-1.00035	-74.3705	translation_only	576.809	701.421	427.153	498.177	87.4081	85.9619	84.9354	102.866	-1.00035
ENSMUSG00000055053	Nfic	-0.053015	-0.31574	-0.26337	0.017727	-0.864606	-1.12733	-0.262729	0.00330335	-0.26337	0.017727	-0.461257	-99.5315	translation_only	2901.07	3226.54	2305.27	2567.72	5888.55	5060.92	4761.4	5725.68	-0.461257
ENSMUSG00000001089	Luzp1	-0.0807702	-0.341115	-0.261006	0.019634	0.748395	0.48805	-0.260418	0.00634233	-0.261006	0.019634	-0.445535	-103.321	translation_only	2090.14	2016.97	1569.62	1653.15	1192.5	1215.43	1122.89	1138.58	-0.445535
ENSMUSG00000037112	Sik2	-0.318169	0.391587	0.70643	0.0197816	1.7665	2.47625	0.709985	0.00083752	0.70643	0.0197816	1.20357	129.094	translation_only	238.386	277.451	342.4	327.161	68.6778	79.6082	61.1936	56.8254	1.20357
ENSMUSG00000039904	Gpr37	0.0406333	-0.416044	-0.45948	0.020069	0.565707	0.10903	-0.457331	0.0167823	-0.45948	0.020069	-0.779955	-84.4219	translation_only	417.176	414.618	301.719	317.247	251.381	301.988	266.175	299.059	-0.779955
ENSMUSG00000040433	Zbtb38	0.0109125	0.284894	0.273308	0.0206434	0.0577253	0.331706	0.273897	0.00988528	0.273308	0.0206434	0.460584	87.8064	translation_only	1313.25	1421.55	1739.12	1573.84	1240.14	1338.76	1313.15	1267.17	0.460584
ENSMUSG00000022148	Fyb	0.197616	1.10201	0.898633	0.0207981	0.966712	1.87111	0.906931	0.00393919	0.898633	0.0207981	1.51148	79.8337	translation_only	106.422	71.7008	213.576	175.973	57.1768	34.011	51.8306	52.2628	1.51148
ENSMUSG00000032243	Itga11	0.237239	-0.411959	-0.65527	0.0208448	1.65765	1.00845	-0.649982	0.00910509	-0.65527	0.0208448	-1.10151	-60.0633	translation_only	238.386	236.924	179.675	175.973	77.5501	70.6383	81.5915	92.0821	-1.10151
ENSMUSG00000066607	6030419C18Rik	0.200162	-0.623306	-0.828437	0.00579681	-2.74629	-3.56976	-0.826505	0.0220179	-0.826505	0.0220179	-1.3697	-72.1967	translation_only	112.808	130.932	71.1921	84.2687	960.832	637.987	927.601	898.423	-1.3697
ENSMUSG00000051043	Gprc5c	0.00870622	-0.316895	-0.326856	0.0223498	0.720103	0.394502	-0.32572	0.0143069	-0.326856	0.0223498	-0.53955	-88.4263	translation_only	981.215	941.463	698.361	830.294	560.595	589.4	556.093	593.141	-0.53955
ENSMUSG00000031380	Vegfd	0.0614488	1.38503	1.31887	0.00116073	-2.97836	-1.65478	1.33539	0.0225465	1.33539	0.0225465	2.19929	87.4597	translation_only	27.6698	15.5871	64.4119	52.0483	160.029	185.753	163.517	194.949	2.19929
ENSMUSG00000052934	Fbxo31	-0.0415857	-0.285045	-0.244016	0.0228579	-0.539667	-0.783126	-0.24344	0.00807891	-0.244016	0.0228579	-0.400421	-98.3004	translation_only	2666.95	2977.14	2159.49	2423.96	4333.27	3716.92	3773.27	3998.11	-0.400421
ENSMUSG00000052369	Tmem106c	0.0857827	-0.539789	-0.629126	0.00833409	-1.30945	-1.93502	-0.627333	0.023362	-0.627333	0.023362	-1.02349	-80.9701	translation_only	236.258	180.811	135.604	151.188	549.094	476.902	495.568	586.92	-1.02349
ENSMUSG00000056459	Zbtb25	0.00584153	-0.600047	-0.611047	0.0233838	1.14174	0.535854	-0.607339	0.0167024	-0.611047	0.0233838	-0.996669	-89.4422	translation_only	249.028	258.746	189.846	146.231	102.195	124.084	118.375	107.014	-0.996669
ENSMUSG00000049422	Chchd10	-0.0337472	-0.332695	-0.29954	0.024176	1.41214	1.11319	-0.299123	0.00146994	-0.29954	0.024176	-0.484241	-95.792	translation_only	2677.59	3095.6	2156.1	2379.35	1231.27	895.126	1090.45	973.913	-0.484241
ENSMUSG00000033161	Atp1a1	-0.144195	-0.321063	-0.176779	0.0248453	1.95781	1.78094	-0.176808	0.000176017	-0.176779	0.0248453	-0.283688	-114.186	translation_only	121373	121885	95750	97870.6	31746.9	29858.7	27205.4	28170.9	-0.283688
ENSMUSG00000038371	Sbf2	-0.131888	0.291845	0.422416	0.0212535	-0.00658016	0.417153	0.423836	0.0250039	0.423836	0.0250039	0.678982	114.319	translation_only	491.672	367.856	610.218	453.564	393.665	464.195	401.27	375.795	0.678982
ENSMUSG00000061533	Cep128	-0.211287	1.31289	1.51556	0.00253668	-2.186	-0.661826	1.53798	0.0251685	1.53798	0.0251685	2.45944	99.1424	translation_only	14.8991	18.7046	50.8515	32.2204	71.6352	76.992	63.2	64.2916	2.45944
ENSMUSG00000026127	Imp4	-0.125059	0.379638	0.502782	0.00699776	-1.8142	-1.30951	0.505058	0.0256897	0.505058	0.0256897	0.803163	108.233	translation_only	225.615	215.102	277.988	292.462	761.042	766.93	696.871	694.764	0.803163
ENSMUSG00000031760	Mt3	0.0138299	-0.233645	-0.24804	0.0259782	-0.482542	-0.730017	-0.247586	0.00262629	-0.24804	0.0259782	-0.39324	-86.6125	translation_only	3103.28	3345	2668.01	2770.95	4996.39	3847.73	4562.1	4310.85	-0.39324
ENSMUSG00000024525	Impa2	-0.217666	-1.04669	-0.839944	0.0263425	1.4206	0.591584	-0.833609	0.0184566	-0.839944	0.0263425	-1.32656	-101.748	translation_only	140.478	165.224	54.2416	89.2257	57.1768	54.5672	46.146	49.3593	-1.32656
ENSMUSG00000058672	Tubb2a	0.169002	0.366692	0.197592	0.0265063	0.132406	0.330097	0.197653	0.000956994	0.197592	0.0265063	0.311534	65.2559	translation_only	8805.39	8890.9	11011	11661.3	8088.21	7792.64	9263.64	8471.14	0.311534
ENSMUSG00000063142	Kcnma1	0.00600382	0.331653	0.324283	0.0267425	-0.323166	0.00248321	0.325725	0.0186462	0.324283	0.0267425	0.510032	88.9629	translation_only	647.048	645.307	806.844	810.467	716.024	875.691	783.813	803.022	0.510032
ENSMUSG00000028378	Ptgr1	0.0395276	-0.352823	-0.394522	0.0270349	0.625217	0.232867	-0.392887	0.0224851	-0.394522	0.0270349	-0.61864	-83.6077	translation_only	512.956	505.023	396.642	396.559	331.888	317.685	314.662	348.834	-0.61864
ENSMUSG00000005950	P2rx5	0.0384723	-0.523677	-0.566776	0.0277398	0.838445	0.276295	-0.563743	0.0260204	-0.566776	0.0277398	-0.882411	-85.7983	translation_only	234.129	246.277	162.725	168.537	124.54	139.408	131.081	138.123	-0.882411
ENSMUSG00000072623	Zfp9	-0.0939896	0.364939	0.456621	0.016154	-0.751137	-0.292208	0.459215	0.0279334	0.459215	0.0279334	0.713563	104.443	translation_only	259.671	271.216	355.96	324.682	432.769	444.76	433.371	382.846	0.713563
ENSMUSG00000034235	Usp54	-0.144584	0.471971	0.613635	0.0160749	-0.20001	0.416545	0.61696	0.0279406	0.61696	0.0279406	0.958611	107.032	translation_only	212.845	118.462	261.038	208.193	203.405	178.651	176.224	167.158	0.958611
ENSMUSG00000021557	Agtpbp1	0.0525851	0.29078	0.237989	0.0280365	-0.719019	-0.480824	0.238254	0.00190333	0.237989	0.0280365	0.369425	79.7493	translation_only	4152.6	3731.56	4925.81	4694.26	5720.96	7081.4	6204.63	6979.57	0.369425
ENSMUSG00000060600	Eno3	-0.0598099	-0.775434	-0.722238	0.0279096	1.21256	0.496939	-0.718542	0.0281767	-0.718542	0.0281767	-1.11382	-94.4105	translation_only	159.634	277.451	166.115	89.2257	80.8361	102.407	96.3047	77.9794	-1.11382
ENSMUSG00000019797	1700021F05Rik	-0.0384879	-0.48802	-0.452356	0.0289194	1.17656	0.727024	-0.45012	0.0176304	-0.452356	0.0289194	-0.696091	-94.5093	translation_only	440.589	442.674	288.158	334.596	182.703	201.824	185.922	185.823	-0.696091
ENSMUSG00000030189	Ybx3	-0.080565	0.283823	0.3633	0.0290887	0.791133	1.15552	0.364429	0.0188046	0.3633	0.0290887	0.558129	105.847	translation_only	649.177	704.538	678.02	944.305	365.077	402.9	355.792	365.425	0.558129
ENSMUSG00000029580	Actb	-0.0166782	0.164145	0.180808	0.0299032	-0.144003	0.0368195	0.180768	0.000453838	0.180808	0.0299032	0.275603	95.8017	translation_only	45768	47821.3	51197.3	53054.6	51759.4	49967.8	51752.7	48132.8	0.275603
ENSMUSG00000028899	Taf12	-0.22061	0.404797	0.622042	0.0153192	-0.640197	-0.0147908	0.626026	0.0300607	0.626026	0.0300607	0.952813	118.59	translation_only	144.734	121.58	183.065	171.016	213.263	198.086	174.887	175.869	0.952813
ENSMUSG00000042476	Abcb4	-0.222895	-0.966081	-0.753059	0.0302564	1.05418	0.310994	-0.746831	0.0262076	-0.753059	0.0302564	-1.14403	-102.992	translation_only	159.634	152.754	71.1921	86.7472	74.5927	73.6283	65.5407	60.5585	-1.14403
ENSMUSG00000040990	Sh3kbp1	0.110605	0.526068	0.413578	0.0162807	-1.14224	-0.726774	0.415978	0.0303478	0.415978	0.0303478	0.631402	78.1266	translation_only	293.726	296.155	420.372	423.822	588.526	692.554	703.559	669.462	0.631402
ENSMUSG00000031962	Cdh15	-0.206401	-0.664938	-0.461838	0.0306655	1.02924	0.570704	-0.459378	0.0191777	-0.461838	0.0306655	-0.698923	-107.245	translation_only	429.947	427.087	264.428	272.634	223.121	189.864	180.237	175.454	-0.698923
ENSMUSG00000032239	Rp9	0.040561	0.519535	0.476367	0.0217267	-0.990092	-0.511118	0.479379	0.0310906	0.479379	0.0310906	0.722601	85.5359	translation_only	210.716	227.572	318.669	304.854	493.232	359.545	454.103	417.688	0.722601
ENSMUSG00000074622	Mafb	0.130545	0.760328	0.62568	0.0257536	-0.131874	0.497909	0.631223	0.0313524	0.631223	0.0313524	0.949189	80.2576	translation_only	114.936	115.345	216.966	173.494	137.356	110.629	124.059	146.004	0.949189
ENSMUSG00000063894	Zkscan8	-0.0256667	-0.575792	-0.553417	0.0154976	-0.626999	-1.17712	-0.551881	0.0322394	-0.551881	0.0322394	-0.823193	-92.5523	translation_only	249.028	230.69	142.384	175.973	353.904	377.111	373.181	339.708	-0.823193
ENSMUSG00000029925	Tbxas1	-0.0636347	1.19644	1.2486	0.0151745	-0.769737	0.490335	1.27117	0.032779	1.27117	0.032779	1.88693	93.0445	translation_only	21.2845	24.9394	44.0713	59.4838	42.0611	34.7585	37.7862	35.2567	1.88693
ENSMUSG00000052331	Ankrd44	-0.0778448	0.396954	0.472903	0.0173784	-0.722481	-0.247681	0.475307	0.0334625	0.475307	0.0334625	0.701288	101.095	translation_only	253.285	211.985	328.84	287.505	381.178	379.728	365.49	350.493	0.701288
ENSMUSG00000055137	Sugct	-0.28493	0.925171	1.20253	0.00755308	-1.5611	-0.350997	1.21655	0.0336114	1.21655	0.0336114	1.79261	107.118	translation_only	21.2845	37.4091	64.4119	44.6128	79.5217	86.3357	59.856	75.4907	1.79261
ENSMUSG00000052974	Cyp2f2	0.337199	-0.782496	-1.14101	0.0336813	1.93438	0.814685	-1.12684	0.0217256	-1.14101	0.0336813	-1.68026	-66.6875	translation_only	76.6241	77.9356	67.802	24.7849	23.9879	15.6974	25.4137	24.4723	-1.68026
ENSMUSG00000030525	Chrna7	-0.0327995	-0.431765	-0.399589	0.0340275	4.5547	4.15573	-0.398988	1.79657e-06	-0.399589	0.0340275	-0.586664	-94.3442	translation_only	3173.52	3126.78	2230.69	2406.61	118.297	145.762	132.085	124.02	-0.586664
ENSMUSG00000027599	Armc1	0.00925561	-0.287401	-0.297945	0.0346001	-0.755565	-1.05222	-0.296999	0.0321479	-0.297945	0.0346001	-0.435275	-88.1555	translation_only	802.425	835.47	691.58	644.408	1237.84	1480.04	1268.01	1448.43	-0.435275
ENSMUSG00000037224	Zfyve28	-0.0802902	-0.324356	-0.244899	0.03487	0.18791	-0.0561559	-0.244336	0.0252165	-0.244899	0.03487	-0.356951	-103.903	translation_only	1662.32	1823.69	1257.73	1492.05	1476.08	1527.88	1417.48	1404.46	-0.356951
ENSMUSG00000032593	Amigo3	-0.107906	-0.428496	-0.321438	0.0348854	2.82698	2.50639	-0.320738	0.00106893	-0.321438	0.0348854	-0.46845	-104.135	translation_only	2298.72	2313.13	1556.06	1836.56	328.273	310.958	262.497	327.265	-0.46845
ENSMUSG00000033739	Fkbpl	-0.0698171	0.478496	0.54492	0.0361011	0.647724	1.19604	0.549019	0.0224406	0.54492	0.0361011	0.786036	98.3014	translation_only	185.175	193.28	274.598	250.328	120.926	116.236	108.008	116.554	0.786036
ENSMUSG00000040164	Kcns1	-0.0849618	-0.388127	-0.30406	0.0365891	1.73387	1.43071	-0.303325	0.00532243	-0.30406	0.0365891	-0.436828	-102.347	translation_only	1555.9	1702.11	1162.8	1298.73	514.591	446.255	406.285	494.423	-0.436828
ENSMUSG00000022831	Hcls1	0.264129	0.916279	0.646908	0.0373651	0.0600783	0.712228	0.6539	0.037741	0.6539	0.037741	0.930622	73.9197	translation_only	93.6517	90.4053	186.455	161.102	100.881	72.8808	104.664	102.866	0.930622
ENSMUSG00000020053	Igf1	0.233431	0.787332	0.551557	0.0112149	-2.61028	-2.05638	0.555386	0.0378499	0.555386	0.0378499	0.789723	73.4857	translation_only	155.377	152.754	203.406	319.725	784.044	1069.67	967.06	1196.65	0.789723
ENSMUSG00000069899	Gm12166	-0.46598	0.870541	1.32328	0.0381318	1.10305	2.43957	1.34028	0.00509747	1.32328	0.0381318	1.87735	118.159	translation_only	53.2112	28.0568	77.9723	74.3547	17.4159	20.9299	11.0349	16.5914	1.87735
ENSMUSG00000020381	Mrnip	0.313883	-0.419839	-0.740472	0.0383448	2.84512	2.1114	-0.734723	0.00445127	-0.740472	0.0383448	-1.04873	-53.2172	translation_only	268.184	199.515	169.505	180.93	29.2456	35.506	40.4613	39.4045	-1.04873
ENSMUSG00000097333	Zfp87	-0.169775	0.39931	0.564732	0.0383865	0.049426	0.618511	0.569597	0.0366228	0.564732	0.0383865	0.79956	113.034	translation_only	153.248	158.989	233.917	178.451	125.526	171.176	129.409	132.316	0.79956
ENSMUSG00000020120	Plek	-0.0499981	0.639747	0.686878	0.0100898	-1.51906	-0.829317	0.691434	0.0386824	0.691434	0.0386824	0.976641	94.4687	translation_only	108.551	74.8182	142.384	146.231	259.596	266.108	259.488	244.723	0.976641
ENSMUSG00000035273	Hpse	-0.106326	-1.16627	-1.08063	0.0331131	0.705249	-0.354697	-1.07001	0.0387533	-1.07001	0.0387533	-1.51053	-95.2091	translation_only	57.4681	87.2879	33.901	29.7419	35.8176	50.4559	32.7703	46.8706	-1.51053
ENSMUSG00000023571	C1qtnf12	0.190603	-0.444351	-0.638726	0.0144326	-0.997023	-1.63198	-0.636819	0.0387808	-0.636819	0.0387808	-0.898796	-66.7833	translation_only	161.762	149.636	108.483	118.968	314.144	298.998	343.085	352.152	-0.898796
ENSMUSG00000019699	Akt3	-0.0455675	-0.320777	-0.276489	0.0344052	-1.41653	-1.69174	-0.275566	0.0389788	-0.275566	0.0389788	-0.38832	-98.085	translation_only	917.361	897.819	759.382	691.499	2199.33	2572.88	2254.13	2337.31	-0.38832
ENSMUSG00000010064	Slc38a3	0.456631	-0.847544	-1.33983	0.0393576	1.60258	0.2984	-1.315	0.0331022	-1.33983	0.0393576	-1.88242	-61.6856	translation_only	51.0828	37.4091	30.5109	19.8279	18.0731	10.8387	24.0762	15.347	-1.88242
ENSMUSG00000060548	Tnfrsf19	0.161437	-0.723123	-0.894997	0.0232672	0.128893	-0.755668	-0.889513	0.0395639	-0.889513	0.0395639	-1.24772	-77.4151	translation_only	87.2664	84.1705	54.2416	49.5698	69.0064	85.5882	86.9417	84.616	-1.24772
ENSMUSG00000020063	Sirt1	-0.135907	0.390328	0.523387	0.0212341	-0.862733	-0.336499	0.526909	0.0397507	0.526909	0.0397507	0.738017	109.197	translation_only	157.505	208.868	216.966	252.806	337.803	309.837	323.022	262.144	0.738017
ENSMUSG00000035131	Brinp3	0.108501	1.18223	1.06723	0.0105671	-1.24294	-0.169213	1.08111	0.0399466	1.08111	0.0399466	1.51195	84.7563	translation_only	40.4405	18.7046	74.5822	64.4408	72.9497	69.8908	79.9195	73.002	1.51195
ENSMUSG00000026082	Rev1	-0.262347	0.504915	0.762563	0.0130859	-1.36794	-0.600683	0.768328	0.0400549	0.768328	0.0400549	1.07362	117.456	translation_only	74.4957	93.5228	149.164	89.2257	210.305	212.289	198.963	150.567	1.07362
ENSMUSG00000040276	Pacsin1	-0.140145	-0.353475	-0.213792	0.040858	0.753899	0.540569	-0.21345	0.00329909	-0.213792	0.040858	-0.296897	-111.627	translation_only	4699.61	4620.03	3535.87	3712.78	2984.04	2453.28	2388.89	2514.01	-0.296897
ENSMUSG00000030259	Rassf8	-0.109588	0.553239	0.66044	0.00891802	-2.03002	-1.3672	0.663637	0.0411713	0.663637	0.0411713	0.919406	101.204	translation_only	91.5233	124.697	183.065	131.36	451.499	405.516	397.257	391.971	0.919406
ENSMUSG00000026208	Des	0.318133	-0.625349	-0.961172	0.041353	1.55902	0.61554	-0.947213	0.0265152	-0.961172	0.041353	-1.32977	-63.0362	translation_only	76.6241	105.992	71.1921	47.0913	35.1604	25.0411	49.1555	25.3018	-1.32977
ENSMUSG00000038286	Bphl	-0.0214051	-0.456901	-0.439049	0.0423189	0.841044	0.405548	-0.436205	0.0326714	-0.439049	0.0423189	-0.603019	-92.6823	translation_only	363.965	374.091	277.988	257.763	190.589	214.531	180.906	215.688	-0.603019
ENSMUSG00000028581	Laptm5	0.061123	0.731841	0.667672	0.0427614	-0.740737	-0.0700183	0.670997	5.33995e-05	0.667672	0.0427614	0.914008	85.2258	translation_only	370.35	377.209	613.608	619.623	776.487	450.366	673.464	598.948	0.914008
ENSMUSG00000033065	Pfkm	0.00247835	-0.202936	-0.205588	0.042891	1.47331	1.26789	-0.205477	0.00254275	-0.205588	0.042891	-0.281169	-89.3003	translation_only	5748.94	6022.87	4986.84	5167.65	2142.16	2024.96	1900.68	2246.89	-0.281169
ENSMUSG00000029491	Pde6b	0.368159	2.20508	1.8224	0.0429781	1.06509	2.90201	1.85673	0.00229427	1.8224	0.0429781	2.49077	80.5213	translation_only	14.8991	15.5871	50.8515	86.7472	7.55785	6.72746	6.35343	12.0287	2.49077
ENSMUSG00000004558	Ndrg2	0.0692402	0.260575	0.191103	0.0433654	-0.511541	-0.320206	0.191334	0.011515	0.191103	0.0433654	0.260447	75.1192	translation_only	3443.83	3373.05	3915.57	4198.56	4919.5	4645.68	5031.25	4937.59	0.260447
ENSMUSG00000019726	Lyst	0.158477	0.422651	0.263852	0.0436674	1.72769	1.99186	0.264186	0.0140708	0.263852	0.0436674	0.358797	69.4459	translation_only	2230.61	1755.11	2840.9	2508.23	580.64	609.582	677.811	641.256	0.358797
ENSMUSG00000026288	Inpp5d	-0.0453311	0.539632	0.580451	0.0437045	-0.0418325	0.54313	0.585601	0.0356613	0.580451	0.0437045	0.789108	94.8018	translation_only	136.221	137.167	213.576	183.408	167.258	109.134	145.126	121.117	0.789108
ENSMUSG00000000308	Ckmt1	-0.190733	-0.39784	-0.207547	0.0439123	1.43154	1.22443	-0.207115	0.00267551	-0.207547	0.0439123	-0.281727	-115.614	translation_only	5821.31	6041.57	4366.45	4572.82	2187.5	2136.34	1710.41	2053.6	-0.281727
ENSMUSG00000045672	Col27a1	-0.274065	1.06849	1.33705	0.00452475	-3.71229	-2.36974	1.35186	0.0439242	1.35186	0.0439242	1.83487	104.386	translation_only	25.5414	12.4697	50.8515	32.2204	310.529	195.844	217.689	198.682	1.83487
ENSMUSG00000037742	Eef1a1	-0.0248135	0.20713	0.231393	0.0441381	-1.16034	-0.928392	0.231947	0.00224042	0.231393	0.0441381	0.31358	96.8313	translation_only	3250.14	3176.66	3705.38	3678.08	6479.37	7665.94	6027.07	7780.94	0.31358
ENSMUSG00000069601	Ank3	0.0677228	0.274862	0.207035	0.0443042	0.525048	0.732188	0.207119	0.00776223	0.207035	0.0443042	0.280233	76.1587	translation_only	12325.8	11260.1	15418.2	12994.7	7396.17	8744.95	8811.88	7985.84	0.280233
ENSMUSG00000072258	Taf1a	-0.0726532	-0.566753	-0.498091	0.0443469	1.62592	1.13182	-0.495048	0.0228149	-0.498091	0.0443469	-0.673985	-97.305	translation_only	319.267	399.031	223.747	252.806	111.067	116.236	106.002	108.673	-0.673985
ENSMUSG00000051920	Rspo2	0.0660385	0.320365	0.25349	0.0443895	-0.569461	-0.315135	0.254346	0.0419438	0.25349	0.0443895	0.3429	78.3525	translation_only	966.315	851.057	1200.1	1073.19	1301.59	1363.81	1437.21	1333.53	0.3429
ENSMUSG00000040174	Alkbh3	-0.0176497	-0.441601	-0.426576	0.0353723	0.150935	-0.273016	-0.424566	0.0446817	-0.424566	0.0446817	-0.57311	-92.2888	translation_only	415.047	330.447	240.697	304.854	311.843	353.939	308.978	344.271	-0.57311
ENSMUSG00000011958	Bnip2	-0.111478	0.379344	0.488921	0.0134544	-2.62268	-2.13186	0.491167	0.0450229	0.491167	0.0450229	0.661389	106.376	translation_only	193.689	183.928	261.038	230.5	1219.11	1073.4	1119.88	988.016	0.661389
ENSMUSG00000029917	C130060K24Rik	-0.411358	0.787544	1.18498	0.0462155	0.496893	1.69579	1.20242	0.0231402	1.18498	0.0462155	1.5822	117.579	translation_only	44.6974	24.9394	74.5822	49.5698	20.3733	29.5261	15.7164	21.5688	1.5822
ENSMUSG00000031538	Plat	-0.0056839	0.325841	0.330281	0.0475243	1.35833	1.68985	0.331662	0.0102877	0.330281	0.0475243	0.43699	90.9994	translation_only	827.966	738.83	979.739	981.482	315.458	288.159	279.551	318.14	0.43699
ENSMUSG00000005150	Wdr83	0.0289708	-0.579517	-0.613305	0.0240784	-0.501713	-1.1102	-0.610685	0.0477481	-0.610685	0.0477481	-0.806741	-87.1381	translation_only	161.762	168.341	122.044	99.1396	226.735	232.471	222.036	243.478	-0.806741
ENSMUSG00000036446	Lum	0.0495208	0.251869	0.202058	0.0481781	0.363661	0.566009	0.202458	0.0161623	0.202058	0.0481781	0.26614	78.8768	translation_only	2664.82	2621.76	3288.4	2986.58	2022.87	2021.23	2051.49	2105.86	0.26614
ENSMUSG00000029419	Gm996	-0.00179105	-0.535844	-0.539117	0.0483713	1.60135	1.0673	-0.535196	0.0164378	-0.539117	0.0483713	-0.709162	-90.1915	translation_only	308.625	317.977	213.576	215.629	124.869	77.7395	102.993	98.3039	-0.709162
ENSMUSG00000032939	Nup93	0.0856291	0.299594	0.213582	0.0489912	0.157005	0.370969	0.21389	0.013488	0.213582	0.0489912	0.279768	74.0491	translation_only	2100.78	2066.85	2556.14	2547.89	1717.6	1962.92	1937.8	1940.36	0.279768
ENSMUSG00000003283	Hck	-0.0224376	1.02546	1.03741	0.0359576	-0.285902	0.761993	1.05442	0.0498139	1.05442	0.0498139	1.37353	91.2535	translation_only	36.1836	24.9394	47.4614	76.8332	39.1036	35.506	32.436	40.6489	1.37353
ENSMUSG00000026728	Vim	-0.044791	0.190517	0.23523	0.0499387	3.43628	3.67159	0.23527	9.24882e-06	0.23523	0.0499387	0.306167	103.23	translation_only	19049.6	19683.4	21896.7	22041.2	1524.06	1997.31	1528.5	1861.14	0.306167
ENSMUSG00000006304	Arpc2	0.144738	0.342018	0.196896	0.0501646	-1.26563	-1.06835	0.197361	0.0122374	0.196896	0.0501646	0.255887	67.0625	translation_only	2779.75	2768.27	3410.44	3576.46	6207.62	6920.31	6785.47	7628.3	0.255887
ENSMUSG00000061175	Fnip2	0.111111	0.732405	0.617233	0.027048	-0.76475	-0.143456	0.622637	0.051412	0.622637	0.051412	0.802539	81.3736	translation_only	108.551	90.4053	193.236	141.274	183.36	151.742	197.291	162.181	0.802539
ENSMUSG00000025971	Maip1	-0.114098	0.380359	0.492353	0.0275764	-0.708243	-0.213785	0.495184	0.051446	0.495184	0.051446	0.638118	106.698	translation_only	170.276	249.394	223.747	307.333	311.843	353.565	280.22	330.583	0.638118
ENSMUSG00000028331	Trmo	0.0161126	0.762924	0.739136	0.0514977	0.1919	0.938711	0.74891	0.0485628	0.739136	0.0514977	0.952164	88.7901	translation_only	70.2388	62.3485	122.044	104.097	56.1909	58.6784	64.2031	51.0185	0.952164
ENSMUSG00000033059	Pygb	-0.0998788	-0.256364	-0.156576	0.052033	1.28291	1.12643	-0.156554	0.00257688	-0.156576	0.052033	-0.201001	-111.286	translation_only	23104.3	22822.7	19062.5	19173.6	9339.2	9232.69	8470.8	8742.82	-0.201001
ENSMUSG00000004451	Ralb	0.143848	0.567523	0.422184	0.0192191	-1.60204	-1.17837	0.424205	0.0520571	0.424205	0.0520571	0.544476	75.777	translation_only	219.23	243.159	369.521	312.29	687.764	686.948	768.097	740.39	0.544476
ENSMUSG00000008136	Fhl2	-0.147464	0.47297	0.616456	0.0362688	-0.194614	0.42582	0.621005	0.0522365	0.621005	0.0522365	0.796144	107.317	translation_only	142.606	84.1705	169.505	151.188	138.013	122.589	121.718	111.992	0.796144
ENSMUSG00000103585	Pcdhgb4	-0.138713	0.404264	0.541865	0.00933512	-5.40133	-4.85835	0.543121	0.0530904	0.543121	0.0530904	0.692471	108.938	translation_only	153.248	127.814	189.846	183.408	6026.23	5751.98	5386.37	5240.8	0.692471
ENSMUSG00000031723	Txnl4b	-0.118299	-1.03738	-0.923673	0.0175562	-2.65606	-3.57514	-0.927716	0.0531429	-0.927716	0.0531429	-1.18243	-96.5057	translation_only	76.6241	77.9356	40.6812	34.6989	511.962	445.507	445.075	431.376	-1.18243
ENSMUSG00000032816	Igdcc4	-0.0435658	-0.527441	-0.487367	0.036914	0.0127943	-0.471081	-0.484933	0.0531648	-0.484933	0.0531648	-0.617987	-94.7218	translation_only	257.542	249.394	200.016	153.666	247.109	247.795	249.456	227.302	-0.617987
ENSMUSG00000003585	Sec14l2	-0.0151522	-0.425425	-0.413518	0.0536993	1.18636	0.776083	-0.410838	0.0369428	-0.413518	0.0536993	-0.525181	-92.0398	translation_only	376.735	433.322	288.158	307.333	166.93	181.641	167.53	175.039	-0.525181
ENSMUSG00000025521	Tmem192	0.108876	-0.531286	-0.644445	0.0232812	-1.12043	-1.76059	-0.642361	0.0538618	-0.642361	0.0538618	-0.814975	-78.4188	translation_only	144.734	130.932	105.093	86.7472	292.127	299.746	283.898	350.493	-0.814975
ENSMUSG00000021318	Gli3	-0.145843	0.862073	0.999108	0.0200869	-1.12228	-0.11436	1.0124	0.0542733	1.0124	0.0542733	1.28111	99.6022	translation_only	36.1836	31.1743	74.5822	49.5698	74.2641	71.012	66.5439	63.8768	1.28111
ENSMUSG00000036242	3632451O06Rik	0.112866	0.317572	0.20449	0.0547192	1.94711	2.15182	0.204674	0.00465213	0.20449	0.0547192	0.258038	70.4346	translation_only	5676.57	5022.17	6668.33	6620.05	1284.18	1452.38	1433.87	1504.84	0.258038
ENSMUSG00000026255	Efhd1	-0.0972021	0.332012	0.427023	0.0282617	-1.06922	-0.640006	0.429361	0.0548329	0.429361	0.0548329	0.541407	106.318	translation_only	249.028	215.102	294.939	289.983	483.045	481.013	428.021	467.462	0.541407
ENSMUSG00000022893	Adamts1	0.180041	0.489791	0.308901	0.0549086	1.658	1.96775	0.309755	0.00832257	0.308901	0.0549086	0.389327	69.8172	translation_only	949.288	875.997	1291.63	1266.51	294.099	276.573	299.615	343.027	0.389327
ENSMUSG00000031633	Slc25a4	0.0348304	-0.165504	-0.200524	0.0549328	0.709185	0.508851	-0.200408	0.00017726	-0.200524	0.0549328	-0.252694	-78.1155	translation_only	23506.6	23997.9	20571.1	21528.2	12844.1	15749.7	12670.1	16417.6	-0.252694
ENSMUSG00000028525	Pde4b	0.106885	0.42135	0.312819	0.0552299	-0.0364486	0.278016	0.314576	0.0429063	0.312819	0.0552299	0.393471	75.7658	translation_only	529.984	467.614	688.19	649.365	449.856	562.49	543.72	538.39	0.393471
ENSMUSG00000045103	Dmd	-0.0104269	0.21856	0.228322	0.0557938	0.600841	0.829829	0.229076	0.0240364	0.228322	0.0557938	0.286182	92.7313	translation_only	1551.64	1458.96	1817.09	1680.42	973.648	983.33	988.795	940.731	0.286182
ENSMUSG00000026452	Syt2	-0.153199	-0.347036	-0.194298	0.0562637	0.0958979	-0.0979394	-0.193933	0.00561112	-0.194298	0.0562637	-0.242828	-113.819	translation_only	5504.17	5489.79	4152.87	4431.54	5543.52	4574.67	4740	4300.07	-0.242828
ENSMUSG00000021716	Srek1ip1	-0.240528	0.661817	0.898423	0.0106972	-2.70542	-1.80308	0.905463	0.0565988	0.905463	0.0565988	1.12929	109.973	translation_only	46.8259	40.5265	74.5822	64.4408	270.768	293.766	256.813	217.347	1.12929
ENSMUSG00000037348	Paqr7	-0.0718294	-0.288906	-0.217782	0.056645	0.317873	0.100797	-0.217317	0.0394744	-0.217782	0.056645	-0.271539	-103.962	translation_only	1862.39	1945.27	1393.33	1687.85	1526.69	1475.18	1416.48	1420.64	-0.271539
ENSMUSG00000033222	Ttf2	-0.0283595	-0.431809	-0.406291	0.0566474	1.20421	0.800756	-0.40401	0.0401349	-0.406291	0.0566474	-0.506571	-93.7576	translation_only	389.506	442.674	274.598	332.118	175.145	178.651	167.53	177.113	-0.506571
ENSMUSG00000096606	Tpbgl	-0.219302	-0.50595	-0.287939	0.0416944	-1.04765	-1.33429	-0.28698	0.0571161	-0.28698	0.0571161	-0.356785	-113.434	translation_only	702.388	754.417	498.345	518.005	1506.31	1449.02	1249.29	1272.56	-0.356785
ENSMUSG00000032067	Pts	-0.133569	0.381346	0.512481	0.0202072	-2.18346	-1.66855	0.515349	0.0574593	0.515349	0.0574593	0.639362	109.303	translation_only	176.661	134.049	206.796	200.758	638.145	767.304	592.541	679.831	0.639362
ENSMUSG00000030307	Slc6a11	0.0606023	-0.545	-0.611689	0.0427415	0.365716	-0.239887	-0.607686	0.0575838	-0.607686	0.0575838	-0.753348	-83.655	translation_only	144.734	177.693	132.214	89.2257	119.283	125.205	138.104	114.895	-0.753348
ENSMUSG00000042460	C1galt1	0.0422827	-0.798339	-0.844687	0.0187446	-2.1332	-2.97383	-0.845912	0.0575985	-0.845912	0.0575985	-1.04858	-86.9683	translation_only	72.3672	102.875	40.6812	57.0053	374.278	373	387.225	377.039	-1.04858
ENSMUSG00000024856	Cdk2ap2	0.022289	-0.362124	-0.386963	0.0438015	-0.553976	-0.938389	-0.385184	0.0578997	-0.385184	0.0578997	-0.476597	-86.4778	translation_only	346.937	383.443	274.598	287.505	589.512	460.831	516.635	543.782	-0.476597
ENSMUSG00000059479	B3gnt8	-0.046922	-0.385813	-0.341071	0.0507587	-0.209067	-0.547958	-0.339335	0.0586848	-0.339335	0.0586848	-0.417883	-96.9342	translation_only	506.571	480.084	335.62	411.429	614.486	509.044	533.02	547.93	-0.417883
ENSMUSG00000036501	Fam13b	-0.0167107	-0.375202	-0.361206	0.0594898	0.735748	0.377257	-0.359176	0.0496588	-0.361206	0.0594898	-0.442678	-92.5501	translation_only	440.589	480.084	366.131	339.553	254.338	288.159	277.545	254.678	-0.442678
ENSMUSG00000044349	Snhg11	-0.116146	0.35706	0.471838	0.018053	-4.80438	-4.33117	0.473193	0.0606995	0.473193	0.0606995	0.575788	108.019	translation_only	227.744	246.277	389.861	220.586	6459.33	6538.34	6781.12	5128.81	0.575788
ENSMUSG00000024238	Zeb1	0.198758	0.432074	0.232545	0.0608617	-0.105841	0.127475	0.233335	0.0455722	0.232545	0.0608617	0.282695	65.2972	translation_only	1019.53	916.523	1328.92	1281.38	998.95	1059.2	1204.14	1141.49	0.282695
ENSMUSG00000021241	Isca2	-0.0808571	-0.454866	-0.376021	0.0373717	-1.06338	-1.43739	-0.374797	0.0609102	-0.374797	0.0609102	-0.455495	-100.08	translation_only	415.047	364.739	274.598	292.462	739.026	872.327	745.358	767.351	-0.455495
ENSMUSG00000078154	Gm12184	-0.145652	0.889069	1.02096	0.0609228	-0.0475645	0.987156	1.04049	0.060229	1.02096	0.0609228	1.24069	99.3039	translation_only	34.0552	24.9394	47.4614	61.9623	26.9454	34.011	31.7672	22.8131	1.24069
ENSMUSG00000047153	Khnyn	0.0295796	-0.365627	-0.398206	0.0615303	0.736692	0.341486	-0.396124	0.0594257	-0.398206	0.0615303	-0.482192	-85.3748	translation_only	336.295	386.561	311.889	247.849	220.163	204.44	224.711	205.733	-0.482192
ENSMUSG00000056880	Gadl1	-0.199836	0.701127	0.894043	0.0235242	-1.2247	-0.323734	0.904655	0.0616142	0.904655	0.0616142	1.09492	105.909	translation_only	34.0552	52.9962	71.1921	66.9193	102.524	93.4369	92.6264	76.7351	1.09492
ENSMUSG00000031557	Plekha2	-0.0552605	0.33595	0.389833	0.0232071	-2.46794	-2.07673	0.391481	0.0621284	0.391481	0.0621284	0.472404	99.341	translation_only	274.57	289.921	400.032	312.29	1613.44	1451.64	1468.65	1462.11	0.472404
ENSMUSG00000032501	Trib1	-0.0995246	0.380805	0.477764	0.0319053	-0.897456	-0.417126	0.481002	0.0621536	0.481002	0.0621536	0.580345	104.647	translation_only	155.377	196.398	216.966	232.978	306.914	331.514	290.252	301.548	0.580345
ENSMUSG00000028782	Adgrb2	0.11034	-0.430799	-0.547199	0.0593432	0.736801	0.195663	-0.542781	0.0621637	-0.542781	0.0621637	-0.654845	-75.6337	translation_only	166.019	205.75	155.945	118.968	121.911	95.6794	121.05	112.407	-0.654845
ENSMUSG00000003469	Phyhip	0.0953358	-0.547011	-0.648241	0.036795	-0.255621	-0.897968	-0.644672	0.062449	-0.644672	0.062449	-0.77649	-80.1135	translation_only	161.762	112.227	111.873	79.3117	179.745	145.762	186.59	158.862	-0.77649
ENSMUSG00000066438	Plekhd1	-0.19742	-0.433611	-0.23715	0.06276	0.610214	0.374023	-0.23649	0.0366944	-0.23715	0.06276	-0.28513	-114.479	translation_only	1353.69	1352.96	996.689	996.353	844.836	899.984	775.119	735.827	-0.28513
ENSMUSG00000049401	Ogfr	-0.0820721	0.337066	0.416529	0.0629342	0.243182	0.66232	0.419418	0.0249314	0.416529	0.0629342	0.500298	103.685	translation_only	334.166	342.917	403.422	443.65	341.746	219.764	298.611	228.546	0.500298
ENSMUSG00000032078	Zpr1	0.116215	0.415075	0.297418	0.0629665	0.573225	0.872085	0.298833	0.0376923	0.297418	0.0629665	0.357167	74.3585	translation_only	564.039	598.546	769.553	768.332	390.051	376.738	437.049	388.238	0.357167
ENSMUSG00000025938	Slco5a1	-0.220986	-0.543143	-0.324446	0.0539385	-0.779636	-1.10179	-0.322797	0.0630719	-0.322797	0.0630719	-0.38741	-112.14	translation_only	547.011	545.55	400.032	349.467	840.893	1005.38	848.351	723.799	-0.38741
ENSMUSG00000016637	Ift27	0.0361423	-0.487887	-0.528499	0.0432543	-0.0859996	-0.610029	-0.525586	0.0633212	-0.525586	0.0633212	-0.629889	-85.7633	translation_only	204.331	196.398	111.873	168.537	224.107	194.723	191.941	235.183	-0.629889
ENSMUSG00000022901	Cd86	-0.180129	0.866214	1.03267	0.0542547	-0.238424	0.807919	1.05212	0.0636278	1.05212	0.0636278	1.25871	101.747	translation_only	29.7983	28.0568	64.4119	42.1343	38.1178	29.1523	26.7513	32.3532	1.25871
ENSMUSG00000047649	Cd3eap	-0.234251	0.37587	0.605146	0.0638496	0.962308	1.57243	0.610305	0.0187108	0.605146	0.0638496	0.723054	121.932	translation_only	170.276	174.576	193.236	247.849	110.082	63.5371	75.9068	70.9281	0.723054
ENSMUSG00000037957	Wdr20	-0.101265	-0.584236	-0.486686	0.0381547	-0.500391	-0.983362	-0.484466	0.06386	-0.484466	0.06386	-0.578825	-99.8333	translation_only	217.102	274.333	179.675	146.231	311.843	367.02	314.662	313.577	-0.578825
ENSMUSG00000028089	Chd1l	-0.102535	0.462207	0.560853	0.0426828	-0.415618	0.149124	0.565669	0.0638723	0.565669	0.0638723	0.675797	102.508	translation_only	112.808	121.58	172.895	148.709	148.528	158.095	149.473	133.975	0.675797
ENSMUSG00000031952	Chst5	0.0811213	-0.57588	-0.666129	0.064236	1.33615	0.67915	-0.659729	0.0491806	-0.666129	0.064236	-0.794174	-81.9818	translation_only	138.349	149.636	74.5822	114.011	46.6615	65.4058	55.8433	61.8029	-0.794174
ENSMUSG00000000881	Dlg3	-0.117468	0.516114	0.6291	0.0335891	-0.905886	-0.272304	0.634269	0.0646654	0.634269	0.0646654	0.754353	102.822	translation_only	97.9086	87.2879	155.945	111.532	180.403	162.58	174.887	138.953	0.754353
ENSMUSG00000035246	Pcyt1b	-0.167249	-0.463184	-0.297395	0.065468	1.03428	0.738349	-0.296311	0.0314701	-0.297395	0.065468	-0.352107	-109.854	translation_only	1006.76	860.41	688.19	666.714	396.623	505.307	383.881	413.54	-0.352107
ENSMUSG00000039652	Cpeb3	-0.0767161	-0.335932	-0.260505	0.0655863	0.771671	0.512455	-0.259447	0.0394672	-0.260505	0.0655863	-0.308226	-102.864	translation_only	1019.53	1010.05	793.283	805.51	556.98	613.32	571.14	530.509	-0.308226
ENSMUSG00000033318	Gstt2	-0.0478648	0.523163	0.566104	0.0599564	-0.07761	0.493417	0.572005	0.0668906	0.572005	0.0668906	0.671897	95.2275	translation_only	104.294	112.227	149.164	158.623	125.526	98.2956	110.684	104.526	0.671897
ENSMUSG00000052572	Dlg2	0.0237911	0.271127	0.246319	0.0676279	-0.118986	0.12835	0.247458	0.0381786	0.246319	0.0676279	0.288162	84.9852	translation_only	1042.94	925.875	1210.27	1164.89	944.074	1169.46	1048.99	1084.25	0.288162
ENSMUSG00000027574	Nkain4	-0.0940631	0.377802	0.46911	0.0351952	-1.15967	-0.687803	0.472438	0.0680123	0.472438	0.0680123	0.55153	103.981	translation_only	170.276	168.341	200.016	235.457	341.746	403.274	331.047	362.107	0.55153
ENSMUSG00000037062	Sh3glb1	0.0713024	0.292098	0.220044	0.0682277	-0.240533	-0.0197375	0.220799	0.0340422	0.220044	0.0682277	0.25658	76.2821	translation_only	1477.14	1306.2	1691.66	1710.16	1504.34	1745.03	1601.07	1789.38	0.25658
ENSMUSG00000020413	Hus1	-0.113493	0.663404	0.773522	0.0157622	-2.27458	-1.49769	0.779395	0.0685995	0.779395	0.0685995	0.906966	99.708	translation_only	61.725	52.9962	115.263	69.3977	277.34	272.462	259.153	245.552	0.906966
ENSMUSG00000018932	Map2k3	0.0551876	-0.462095	-0.51997	0.0273051	-1.74758	-2.26486	-0.518902	0.0686072	-0.518902	0.0686072	-0.60381	-83.1895	translation_only	176.661	193.28	132.214	133.839	618.429	599.491	623.305	633.79	-0.60381
ENSMUSG00000028233	Tgs1	-0.0500171	0.297271	0.345504	0.0494182	-0.860881	-0.513593	0.347383	0.0688998	0.347383	0.0688998	0.403583	99.5508	translation_only	363.965	305.508	423.762	401.516	576.697	628.27	620.63	534.657	0.403583
ENSMUSG00000025439	Clns1a	-0.0541313	-0.357992	-0.305599	0.0524492	-0.659574	-0.963434	-0.304141	0.0689788	-0.304141	0.0689788	-0.353194	-98.5985	translation_only	540.626	570.489	403.422	453.564	819.862	904.095	791.839	857.359	-0.353194
ENSMUSG00000039128	Cdc123	-0.0340694	-0.306936	-0.274391	0.0691179	-0.454463	-0.72733	-0.273342	0.068613	-0.274391	0.0691179	-0.318405	-96.3338	translation_only	744.957	707.656	525.465	636.972	942.431	1019.58	852.698	1051.06	-0.318405
ENSMUSG00000074211	Sdhaf1	0.165091	-0.508824	-0.6784	0.02957	-1.19553	-1.86945	-0.676274	0.0692402	-0.676274	0.0692402	-0.784236	-72.0241	translation_only	102.166	118.462	67.802	84.2687	269.454	224.622	267.847	282.883	-0.784236
ENSMUSG00000020591	Ntsr2	-0.00574844	-0.963962	-0.978846	0.0692857	2.18635	1.22814	-0.964559	0.0364209	-0.978846	0.0692857	-1.13483	-90.3417	translation_only	117.065	62.3485	37.2911	54.5268	16.7587	22.7986	20.3979	18.6653	-1.13483
ENSMUSG00000026656	Fcgr2b	0.241724	0.771855	0.526087	0.0560541	-0.189726	0.340405	0.531248	0.0693873	0.531248	0.0693873	0.615568	72.6109	translation_only	110.679	130.932	237.307	173.494	155.1	113.619	159.17	156.788	0.615568
ENSMUSG00000009575	Cbx5	-0.031075	-0.301513	-0.271474	0.0431761	-2.13046	-2.4009	-0.270721	0.0708688	-0.270721	0.0708688	-0.311206	-95.8843	translation_only	723.672	657.777	569.537	550.225	2968.26	3002.69	2915.22	2888.97	-0.311206
ENSMUSG00000030616	Sytl2	0.0630301	0.292628	0.228654	0.0710045	-0.412981	-0.183382	0.229587	0.0431808	0.228654	0.0710045	0.262659	77.8446	translation_only	1045.07	1112.92	1264.51	1353.26	1288.78	1532.74	1400.1	1526.82	0.262659
ENSMUSG00000040875	Osbpl10	-0.0215667	-0.266858	-0.246363	0.0711981	1.5969	1.35161	-0.245508	0.016865	-0.246363	0.0711981	-0.282709	-94.6204	translation_only	1668.7	1602.36	1359.43	1348.3	550.737	514.277	568.131	473.684	-0.282709
ENSMUSG00000056258	Kcnq3	0.095956	0.52804	0.43012	0.0259592	-2.85872	-2.42664	0.432587	0.071547	0.432587	0.071547	0.495489	79.7005	translation_only	195.817	174.576	257.648	275.112	1238.17	1419.49	1287.74	1533.46	0.495489
ENSMUSG00000030849	Fgfr2	-0.0576588	-0.822894	-0.76717	0.0221697	-6.4362	-7.20144	-0.770322	0.0716294	-0.770322	0.0716294	-0.881948	-94.0081	translation_only	102.166	81.0531	57.6317	47.0913	7913.39	7822.16	7687.99	7329.24	-0.881948
ENSMUSG00000037013	Ss18	-0.0837067	0.453221	0.534292	0.0246433	-1.77791	-1.24098	0.537464	0.0718569	0.537464	0.0718569	0.614607	100.464	translation_only	153.248	102.875	189.846	166.059	458.4	419.719	416.317	406.903	0.614607
ENSMUSG00000046157	Tmem229b	-0.0305716	-0.449351	-0.420676	0.0278267	-3.58435	-4.00313	-0.419997	0.0720853	-0.419997	0.0720853	-0.479701	-93.8921	translation_only	270.313	286.803	210.186	195.801	3109.23	3452.31	3228.55	3150.7	-0.479701
ENSMUSG00000025314	Ptprj	0.118222	0.464521	0.344261	0.0729187	0.244861	0.591159	0.346435	0.0567932	0.344261	0.0729187	0.391481	75.7211	translation_only	346.937	342.917	501.735	448.607	312.172	260.502	330.044	287.445	0.391481
ENSMUSG00000033826	Dnah8	-0.533731	0.803963	1.32171	0.0730064	1.22458	2.56227	1.34146	0.0124757	1.32171	0.0730064	1.50231	123.579	translation_only	42.569	24.9394	74.5822	47.0913	13.8013	15.3237	12.0381	7.8809	1.50231
ENSMUSG00000021222	Dcaf4	-0.00296015	-0.391399	-0.391789	0.0720965	0.599992	0.211553	-0.389172	0.0731467	-0.389172	0.0731467	-0.442023	-90.4333	translation_only	302.24	339.799	247.477	237.935	208.991	205.935	196.622	214.858	-0.442023
ENSMUSG00000052861	Dnah6	-0.301735	-1.44486	-1.1835	0.0739457	1.78246	0.639335	-1.15827	0.0501235	-1.1835	0.0739457	-1.33864	-101.796	translation_only	48.9543	71.7008	27.1208	17.3494	12.4869	21.6774	13.3757	14.1027	-1.33864
ENSMUSG00000021322	Aoah	0.182292	1.30133	1.10981	0.0238648	-1.37462	-0.255583	1.13201	0.0740773	1.13201	0.0740773	1.27953	82.0258	translation_only	25.5414	12.4697	44.0713	52.0483	48.9617	51.5772	54.8402	58.4846	1.27953
ENSMUSG00000021576	Pdcd6	-0.026781	-0.289961	-0.264613	0.0611706	-0.866386	-1.12957	-0.263574	0.0744534	-0.263574	0.0744534	-0.297342	-95.2769	translation_only	734.315	754.417	545.806	656.8	1247.7	1420.99	1275.7	1325.65	-0.297342
ENSMUSG00000096687	Mfsd4b4	0.0350309	-0.91246	-0.954886	0.0313061	-1.76508	-2.71257	-0.956424	0.0749404	-0.956424	0.0749404	-1.07625	-87.8014	translation_only	61.725	56.1137	27.1208	34.6989	214.249	180.894	225.714	176.283	-1.07625
ENSMUSG00000041974	Spidr	-0.111858	0.558052	0.665916	0.0287461	-1.43638	-0.766468	0.671159	0.0751134	0.671159	0.0751134	0.754572	101.334	translation_only	68.1103	84.1705	128.824	94.1827	214.906	186.5	193.947	175.039	0.754572
ENSMUSG00000021868	Ppif	0.0139361	-0.372369	-0.388971	0.0542964	-0.26667	-0.652975	-0.386937	0.0754758	-0.386937	0.0754758	-0.434218	-87.8567	translation_only	297.983	399.031	250.867	277.591	384.464	432.8	377.193	442.575	-0.434218
ENSMUSG00000060397	Zfp128	-0.126823	0.590397	0.709983	0.075848	0.919629	1.63685	0.718371	0.0343035	0.709983	0.075848	0.795221	102.123	translation_only	85.1379	102.875	115.263	161.102	38.4464	58.6784	41.7989	46.4558	0.795221
ENSMUSG00000028545	Bend5	0.273769	1.00323	0.722101	0.0764979	0.636441	1.3659	0.732433	0.0531476	0.722101	0.0764979	0.806118	74.7363	translation_only	63.8534	59.2311	138.994	109.054	40.418	37.7485	51.4963	42.308	0.806118
ENSMUSG00000059970	Hspa2	-0.0495646	0.251912	0.300703	0.0765327	2.2755	2.57698	0.301515	0.00768402	0.300703	0.0765327	0.335631	101.131	translation_only	1240.89	1103.57	1325.53	1454.87	249.738	228.36	232.068	226.887	0.335631
ENSMUSG00000060275	Nrg2	-0.265731	-0.709672	-0.447899	0.0766553	0.896039	0.452097	-0.445483	0.0750627	-0.447899	0.0766553	-0.499612	-110.528	translation_only	334.166	277.451	233.917	146.231	166.601	158.469	139.107	129.413	-0.499612
ENSMUSG00000033502	Cdc14a	-0.0946003	-0.930375	-0.844139	0.0361076	-1.2691	-2.10488	-0.842683	0.0769574	-0.842683	0.0769574	-0.938538	-95.8059	translation_only	61.725	99.7576	40.6812	42.1343	208.005	168.56	194.281	155.959	-0.938538
ENSMUSG00000001707	Eef1e1	-0.0173757	0.274347	0.29054	0.0558943	-1.35511	-1.06339	0.291675	0.0772326	0.291675	0.0772326	0.324401	93.624	translation_only	515.084	433.322	542.416	602.273	1103.45	1300.27	1155.32	1202.87	0.324401
ENSMUSG00000057967	Fgf18	0.255084	-0.542345	-0.811695	0.0774445	2.13471	1.33728	-0.800578	0.0359267	-0.811695	0.0774445	-0.901801	-64.8107	translation_only	108.551	105.992	57.6317	86.7472	28.5884	19.4349	24.745	32.3532	-0.901801
ENSMUSG00000039476	Prrx2	-0.0801062	0.950945	1.01554	0.0774908	-0.201102	0.829949	1.03785	0.078258	1.03785	0.078258	1.14835	94.8151	translation_only	25.5414	24.9394	47.4614	49.5698	36.4748	20.5561	26.7513	26.961	1.14835
ENSMUSG00000024053	Emilin2	0.0101254	0.756568	0.737864	0.0783916	0.658369	1.40481	0.749042	0.047591	0.737864	0.0783916	0.815879	89.2332	translation_only	70.2388	65.4659	128.824	101.618	49.6189	35.1323	43.8053	41.0636	0.815879
ENSMUSG00000062627	Mysm1	-0.046155	0.39765	0.44139	0.0517909	-0.476784	-0.0329788	0.444174	0.079065	0.444174	0.079065	0.489486	96.6207	translation_only	219.23	152.754	257.648	237.935	244.809	272.088	251.462	245.552	0.489486
ENSMUSG00000032318	Isl2	-0.0989056	-0.283033	-0.184328	0.0794083	2.34249	2.15836	-0.18414	0.00882653	-0.184328	0.0794083	-0.202785	-109.262	translation_only	5167.87	5072.05	4078.29	4285.31	1019.65	967.259	911.551	931.605	-0.202785
ENSMUSG00000006526	Tmem110	0.0254658	-0.510786	-0.538896	0.0319075	-2.47067	-3.00692	-0.538142	0.0809808	-0.538142	0.0809808	-0.587446	-87.1458	translation_only	166.019	155.871	125.434	101.618	938.816	820.002	893.159	885.564	-0.587446
ENSMUSG00000040901	Kcnk18	-0.0377324	-0.508698	-0.475454	0.0815391	2.03456	1.5636	-0.471799	0.0312702	-0.475454	0.0815391	-0.517595	-94.2421	translation_only	355.451	305.508	216.966	245.371	75.9071	83.7195	71.5597	82.9569	-0.517595
ENSMUSG00000030124	Lag3	0.282857	-0.931409	-1.24926	0.0621623	0.469029	-0.745238	-1.22961	0.0824877	-1.22961	0.0824877	-1.33242	-73.1071	translation_only	27.6698	43.644	13.5604	22.3064	35.1604	14.5762	34.1079	26.1314	-1.33242
ENSMUSG00000009394	Syn2	-0.113842	-0.273832	-0.160287	0.0833502	0.486454	0.326464	-0.159999	0.0279022	-0.160287	0.0833502	-0.172965	-112.574	translation_only	4674.07	4897.48	3824.03	4032.5	3361.6	3353.64	3039.62	3124.57	-0.172965
ENSMUSG00000020715	Ern1	0.0757378	0.544027	0.465484	0.0489348	-0.881013	-0.412723	0.468998	0.0836569	0.468998	0.0836569	0.505344	82.0744	translation_only	134.092	165.224	233.917	198.279	285.555	251.532	304.965	257.166	0.505344
ENSMUSG00000061371	Zfp873	-0.264817	0.747488	1.00085	0.0448846	-0.916388	0.0959169	1.01817	0.0837144	1.01817	0.0837144	1.09677	109.508	translation_only	27.6698	28.0568	54.2416	39.6559	49.6189	53.8197	46.8148	38.5749	1.09677
ENSMUSG00000060519	Tor3a	-0.064611	0.437904	0.498142	0.0837716	0.498845	1.00136	0.502739	0.0708791	0.498142	0.0837716	0.536451	98.3932	translation_only	170.276	121.58	203.406	195.801	108.439	97.5481	92.9608	102.866	0.536451
ENSMUSG00000021806	Nid2	-0.12083	0.276497	0.396674	0.0860012	3.60696	4.00428	0.397431	0.000117461	0.396674	0.0860012	0.422654	113.605	translation_only	1343.05	1352.96	1664.54	1586.23	114.025	103.528	88.2793	110.747	0.422654
ENSMUSG00000053897	Slc39a8	-0.177423	0.469918	0.641496	0.0555684	-0.572776	0.0745662	0.648366	0.0871465	0.648366	0.0871465	0.687106	110.685	translation_only	87.2664	62.3485	105.093	104.097	107.124	115.114	89.9513	105.355	0.687106
ENSMUSG00000024542	Cep192	-0.188072	0.440109	0.622062	0.0728367	-0.0524514	0.57573	0.629425	0.0872952	0.629425	0.0872952	0.666567	113.139	translation_only	89.3948	84.1705	149.164	89.2257	83.7935	93.8106	84.9354	69.6838	0.666567
ENSMUSG00000054021	Sirt5	-0.0915408	-0.571658	-0.485432	0.0873538	1.04493	0.56481	-0.481656	0.0815025	-0.485432	0.0873538	-0.513936	-99.0977	translation_only	202.203	255.629	118.653	180.93	115.997	100.538	101.989	99.963	-0.513936
ENSMUSG00000026112	Coa5	-0.158784	0.655186	0.811898	0.0138777	-6.48238	-5.66841	0.816205	0.0874065	0.816205	0.0874065	0.863918	103.623	translation_only	57.4681	31.1743	67.802	74.3547	4080.25	3926.22	3664.59	3459.3	0.863918
ENSMUSG00000028018	Gstcd	-0.21927	0.577332	0.792143	0.0274651	-1.9604	-1.1638	0.798588	0.0879422	0.798588	0.0879422	0.843151	110.797	translation_only	46.8259	46.7614	61.0218	76.8332	183.36	174.914	157.164	148.493	0.843151
ENSMUSG00000021733	Slc4a7	-0.023241	0.351354	0.371978	0.0751236	-0.205039	0.169556	0.374678	0.0880079	0.374678	0.0880079	0.395465	93.7844	translation_only	251.157	227.572	288.158	319.725	278.983	266.108	282.895	249.7	0.395465
ENSMUSG00000071540	3425401B19Rik	-0.0773629	-0.886381	-0.823661	0.0882064	3.16587	2.35685	-0.812392	0.0108339	-0.823661	0.0882064	-0.868551	-94.9881	translation_only	155.377	196.398	84.7525	101.618	14.7871	23.5461	19.3947	16.5914	-0.868551
ENSMUSG00000030246	Ldhb	-0.0721026	-0.2626	-0.190889	0.0882393	1.56483	1.37433	-0.190528	0.0117942	-0.190889	0.0882393	-0.201262	-105.353	translation_only	3846.11	3778.32	3135.84	3184.86	1197.1	1340.26	1093.46	1304.08	-0.201262
ENSMUSG00000024270	Slc39a6	0.0939725	0.263766	0.169457	0.0883811	-0.0867489	0.0830444	0.16974	0.0217655	0.169457	0.0883811	0.178547	70.3904	translation_only	3763.1	3541.4	4407.13	4329.92	3942.57	3700.1	4292.58	3809.79	0.178547
ENSMUSG00000040640	Erc2	0.178634	0.389818	0.210298	0.088884	-1.23486	-1.02367	0.211141	0.0815447	0.210298	0.088884	0.22106	65.3804	translation_only	1055.71	879.114	1281.46	1256.59	2111.6	2397.96	2673.12	2394.55	0.22106
ENSMUSG00000029499	Pxmp2	-0.103917	0.890269	0.989945	0.0176294	-3.03955	-2.04537	1.00058	0.0893798	1.00058	0.0893798	1.04937	96.6577	translation_only	29.7983	21.822	44.0713	52.0483	220.163	203.692	200.969	190.801	1.04937
ENSMUSG00000039899	Fgl2	0.133352	0.36416	0.229885	0.0895085	0.126367	0.357175	0.230971	0.0654483	0.229885	0.0895085	0.24095	69.8877	translation_only	840.737	869.762	1162.8	1031.05	814.933	724.323	830.628	846.989	0.24095
ENSMUSG00000031441	Atp11a	-0.184647	-0.369046	-0.184624	0.0912818	0.923644	0.739245	-0.184525	0.0151213	-0.184624	0.0912818	-0.191938	-116.58	translation_only	5778.74	5174.93	4332.55	4124.21	2509.21	3185.08	2371.5	2603.19	-0.191938
ENSMUSG00000020331	Hcn2	0.239279	-0.374617	-0.615535	0.091509	1.40132	0.78743	-0.613992	5.67308e-09	-0.615535	0.091509	-0.639255	-57.4324	translation_only	1779.38	1939.04	1315.36	1519.31	937.83	442.517	936.964	683.15	-0.639255
ENSMUSG00000073436	Eme2	0.00667098	-0.430019	-0.441482	0.0915935	1.37999	0.943297	-0.437451	0.0665107	-0.441482	0.0915935	-0.458318	-89.1112	translation_only	304.368	243.159	189.846	215.629	102.852	105.771	99.983	108.259	-0.458318
ENSMUSG00000090071	Cdk5r2	-0.0574393	-0.228417	-0.171439	0.0916067	-0.678498	-0.849476	-0.17109	0.071151	-0.171439	0.0916067	-0.177966	-104.115	translation_only	3035.17	3379.29	2454.43	2961.8	5172.85	4907.31	4864.72	4757.58	-0.177966
ENSMUSG00000067006	Serpinb5	0.324678	1.27106	0.933755	0.0739211	-0.279693	0.666692	0.955942	0.0920874	0.955942	0.0920874	0.990165	75.6709	translation_only	21.2845	28.0568	54.2416	61.9623	32.203	25.7886	30.4296	41.8932	0.990165
ENSMUSG00000072941	Sod3	0.145035	0.392706	0.246878	0.0923367	0.966856	1.21453	0.247772	0.0466834	0.246878	0.0923367	0.255426	69.7296	translation_only	842.865	1016.28	1179.75	1229.33	493.232	436.163	521.65	499.4	0.255426
ENSMUSG00000024810	Il33	-0.178922	0.467064	0.640513	0.057971	-0.432502	0.213484	0.646946	0.092639	0.646946	0.092639	0.668429	110.961	translation_only	68.1103	96.6402	142.384	84.2687	109.096	106.518	88.9481	100.378	0.668429
ENSMUSG00000033075	Senp1	-0.157723	0.601311	0.75536	0.0256601	-2.48503	-1.72599	0.761867	0.0927161	0.761867	0.0927161	0.78689	104.698	translation_only	44.6974	56.1137	67.802	81.7902	293.113	256.017	255.475	233.524	0.78689
ENSMUSG00000028785	Hpca	-0.136793	-0.448837	-0.314325	0.0929109	0.670408	0.358364	-0.312654	0.0818063	-0.314325	0.0929109	-0.324362	-106.95	translation_only	464.002	526.845	359.351	359.381	290.813	319.18	286.908	263.803	-0.324362
ENSMUSG00000024982	Zdhhc6	-0.113669	0.46113	0.571505	0.0328918	-2.25411	-1.67931	0.575406	0.0942414	0.575406	0.0942414	0.590228	103.847	translation_only	80.881	109.11	138.994	118.968	406.481	473.912	375.187	433.035	0.590228
ENSMUSG00000072849	Serpina1e	0.0371562	-1.01853	-1.09	0.0950261	2.58377	1.52809	-1.0646	0.0373538	-1.09	0.0950261	-1.11415	-87.9108	translation_only	65.9819	68.5834	33.901	32.2204	10.8439	11.2124	13.71	8.71047	-1.11415
ENSMUSG00000021886	Gpr65	0.168472	1.27233	1.09224	0.0395269	-1.27911	-0.175245	1.1189	0.095307	1.1189	0.095307	1.14225	82.4572	translation_only	19.156	15.5871	33.901	49.5698	45.6757	38.1223	41.4645	52.2628	1.14225
ENSMUSG00000033581	Igf2bp2	0.253282	1.25338	0.990326	0.0370768	-1.35425	-0.354145	1.01211	0.0962977	1.01211	0.0962977	1.02869	78.5756	translation_only	21.2845	21.822	61.0218	42.1343	52.2477	56.0621	71.2253	56.8254	1.02869
ENSMUSG00000022324	Matn2	-0.0473267	0.167736	0.214829	0.0966042	2.75676	2.97182	0.215107	0.0021886	0.214829	0.0966042	0.218052	105.756	translation_only	4527.21	4467.27	5146.17	4912.37	601.67	708.625	575.487	683.979	0.218052
ENSMUSG00000021108	Prkch	-0.0398763	-0.649724	-0.619677	0.0898509	0.597702	-0.0121462	-0.613177	0.0979144	-0.613177	0.0979144	-0.61879	-93.5121	translation_only	108.551	124.697	81.3624	66.9193	68.0206	82.972	62.1968	83.7864	-0.61879
ENSMUSG00000033082	Clec1a	-0.145969	0.664183	0.802287	0.0522599	-0.898814	-0.0886631	0.813968	0.0980088	0.813968	0.0980088	0.821078	102.395	translation_only	44.6974	37.4091	74.5822	57.0053	78.2073	73.6283	65.8751	70.5133	0.821078
ENSMUSG00000053825	Ppfia2	0.0326109	0.297328	0.2636	0.0998119	0.51507	0.779787	0.264818	0.038547	0.2636	0.0998119	0.263816	83.7408	translation_only	789.654	869.762	1050.93	974.047	474.83	664.523	588.194	568.254	0.263816
ENSMUSG00000036402	Gng12	-0.0476998	-0.549187	-0.50415	0.0431095	-2.45191	-2.9534	-0.5034	0.101338	-0.5034	0.101338	-0.500493	-94.964	translation_only	157.505	180.811	132.214	99.1396	874.41	938.106	859.72	881.831	-0.500493
ENSMUSG00000034472	Rasd2	-0.0540454	-0.883906	-0.845342	0.071199	0.086393	-0.743468	-0.837925	0.10149	-0.837925	0.10149	-0.832542	-93.4989	translation_only	68.1103	62.3485	27.1208	42.1343	61.4486	59.7996	49.8243	66.3655	-0.832542
ENSMUSG00000025141	Myadml2	-0.126688	-1.1127	-1.00676	0.0686895	-0.140281	-1.12629	-1.00058	0.101501	-1.00058	0.101501	-0.994106	-96.4955	translation_only	51.0828	46.7614	16.9505	27.2634	49.2903	57.1834	38.1206	58.8994	-0.994106
ENSMUSG00000028636	Ppcs	-0.0777269	-0.50504	-0.431959	0.0889193	0.305828	-0.121485	-0.428482	0.101845	-0.428482	0.101845	-0.42508	-98.7493	translation_only	204.331	271.216	169.505	161.102	170.216	204.814	162.18	190.801	-0.42508
ENSMUSG00000033781	Asb13	-0.265203	-0.514138	-0.250591	0.103033	1.01655	0.767617	-0.249123	0.0496934	-0.250591	0.103033	-0.247339	-117.286	translation_only	1087.64	1094.22	715.311	798.074	478.773	582.673	403.945	473.269	-0.247339
ENSMUSG00000026826	Nr4a2	0.0324017	0.554449	0.517825	0.0671905	-0.544726	-0.0226783	0.522907	0.103735	0.522907	0.103735	0.514579	86.6555	translation_only	97.9086	102.875	149.164	143.752	143.599	143.893	142.785	149.322	0.514579
ENSMUSG00000027699	Ect2	-0.0503608	1.04575	1.08097	0.0680285	-0.794047	0.302065	1.10641	0.104209	1.10641	0.104209	1.0866	92.7571	translation_only	27.6698	9.35228	37.2911	42.1343	28.917	37.3748	40.127	23.2279	1.0866
ENSMUSG00000032253	Phip	0.050142	0.307628	0.256225	0.104295	0.148616	0.406101	0.257513	0.101519	0.256225	0.104295	0.251545	80.7424	translation_only	608.736	517.493	769.553	632.015	485.674	519.883	525.663	508.111	0.251545
ENSMUSG00000057421	Las1l	-0.018263	0.26977	0.287263	0.104401	2.38053	2.66856	0.288186	0.0102494	0.287263	0.104401	0.28189	93.8729	translation_only	1087.64	1072.39	1278.07	1311.12	208.662	199.581	193.613	206.977	0.28189
ENSMUSG00000048078	Tenm4	0.0614287	0.270941	0.208768	0.105349	0.203997	0.413509	0.209565	0.0768261	0.208768	0.105349	0.204043	77.2257	translation_only	1049.32	1081.75	1379.77	1184.72	863.895	954.925	953.35	931.191	0.204043
ENSMUSG00000036686	Cc2d1a	0.0823289	-0.296383	-0.38051	0.106232	3.26978	2.89107	-0.379129	0.00605283	-0.38051	0.106232	-0.37052	-74.4759	translation_only	859.893	798.061	691.58	656.8	94.6374	74.7495	95.6359	82.5421	-0.37052
ENSMUSG00000050192	Eif5a2	-0.0658748	-0.251246	-0.18636	0.106814	-1.26954	-1.45491	-0.185648	0.104932	-0.18636	0.106814	-0.181025	-104.692	translation_only	1419.67	1259.44	1084.83	1157.46	3049.43	3329.34	3107.5	2944.14	-0.181025
ENSMUSG00000038482	Tfdp1	0.144123	-0.605313	-0.753538	0.0443598	-2.27159	-3.02103	-0.755028	0.107318	-0.755028	0.107318	-0.731868	-76.6074	translation_only	70.2388	71.7008	54.2416	39.6559	335.174	338.615	394.916	344.271	-0.731868
ENSMUSG00000031389	Arhgap4	0.0105195	0.985169	0.969758	0.0232809	-3.16845	-2.1938	0.984331	0.107846	0.984331	0.107846	0.952041	89.3882	translation_only	23.4129	24.9394	33.901	59.4838	240.208	185.753	215.014	211.54	0.952041
ENSMUSG00000043487	Acot6	-0.0418281	-0.469652	-0.432177	0.0913198	0.320786	-0.107038	-0.428863	0.108305	-0.428863	0.108305	-0.414004	-95.0894	translation_only	204.331	218.22	145.774	156.145	167.916	164.075	154.154	166.328	-0.414004
ENSMUSG00000026344	Lypd1	-0.269863	0.69401	0.957382	0.0338637	-2.55459	-1.59072	0.969709	0.108611	0.969709	0.108611	0.934924	111.248	translation_only	23.4129	31.1743	47.4614	39.6559	183.36	127.448	133.088	123.191	0.934924
ENSMUSG00000029381	Shroom3	-0.0713198	-0.336708	-0.26704	0.108894	2.04325	1.77786	-0.265489	0.0336968	-0.26704	0.108894	-0.257158	-101.959	translation_only	1070.61	1013.16	823.794	820.38	252.695	245.552	248.118	222.739	-0.257158
ENSMUSG00000021990	Spata13	0.167983	0.344056	0.175609	0.109142	-0.801485	-0.625413	0.176062	0.0584576	0.175609	0.109142	0.168938	63.9763	translation_only	1817.69	1708.35	2166.27	2287.65	3128.95	2928.69	3624.13	3135.77	0.168938
ENSMUSG00000028479	Gne	0.00884815	-0.256606	-0.266614	0.109911	2.31288	2.04743	-0.265506	0.0214526	-0.266614	0.109911	-0.255672	-88.0251	translation_only	1219.6	1203.33	1003.47	1013.7	256.967	222.754	222.37	257.581	-0.255672
ENSMUSG00000019944	Rhobtb1	0.241558	0.95304	0.70434	0.0679216	-0.610911	0.10057	0.715369	0.109913	0.715369	0.109913	0.686004	75.7773	translation_only	55.3396	34.2917	98.3129	79.3117	59.8056	78.1132	82.929	78.809	0.686004
ENSMUSG00000019467	Arhgef25	-0.137927	-0.415627	-0.279758	0.0885536	-1.57663	-1.85433	-0.278059	0.11031	-0.278059	0.11031	-0.266209	-108.359	translation_only	561.91	486.318	379.691	403.994	1738.96	1350.72	1408.46	1382.06	-0.266209
ENSMUSG00000057230	Aak1	-0.101467	-0.257124	-0.156085	0.110504	0.331597	0.175941	-0.155742	0.0491941	-0.156085	0.110504	-0.149314	-111.535	translation_only	4158.99	4027.71	3596.9	3234.43	3092.47	3313.27	3062.69	2866.57	-0.149314
ENSMUSG00000040435	Ppp1r15a	0.126307	0.876945	0.745812	0.0346569	-2.49028	-1.73964	0.754913	0.110906	0.754913	0.110906	0.720976	81.804	translation_only	61.725	24.9394	88.1426	76.8332	289.17	207.804	293.93	245.137	0.720976
ENSMUSG00000000374	Trappc10	-0.0610258	-0.252546	-0.192374	0.111359	0.377268	0.185748	-0.191533	0.0663359	-0.192374	0.111359	-0.183385	-103.585	translation_only	1543.12	1555.6	1295.02	1291.29	1088.99	1258.41	1092.12	1142.32	-0.183385
ENSMUSG00000051951	Xkr4	-0.160313	0.472425	0.628283	0.0494801	-1.91689	-1.28416	0.634132	0.111482	0.634132	0.111482	0.604199	108.744	translation_only	74.4957	59.2311	94.9228	91.7042	208.334	294.139	216.017	230.205	0.604199
ENSMUSG00000038147	Cd84	0.218713	1.1565	0.923497	0.0860188	-0.374049	0.563735	0.947415	0.111605	0.947415	0.111605	0.90224	79.2909	translation_only	25.5414	21.822	67.802	39.6559	36.4748	24.2936	35.1111	35.2567	0.90224
ENSMUSG00000008734	Gprc5b	-0.0873701	-0.270059	-0.183398	0.111753	0.1601	-0.022589	-0.182873	0.0761276	-0.183398	0.111753	-0.174547	-107.928	translation_only	1653.8	1646	1305.19	1410.26	1382.1	1524.52	1340.24	1376.67	-0.174547
ENSMUSG00000027466	Rbck1	-0.0306229	-0.330359	-0.301771	0.0808158	-1.05671	-1.35644	-0.300152	0.111793	-0.300152	0.111793	-0.28562	-95.296	translation_only	398.02	467.614	335.62	344.51	958.532	802.062	876.44	836.205	-0.28562
ENSMUSG00000042515	Mum1l1	-0.203757	-1.14228	-0.969847	0.111799	1.45632	0.517796	-0.95128	0.0977452	-0.969847	0.111799	-0.92287	-100.114	translation_only	70.2388	43.644	30.5109	22.3064	19.0589	22.4249	18.7259	17.0062	-0.92287
ENSMUSG00000001870	Ltbp1	0.133211	0.417455	0.282788	0.11191	1.42917	1.71342	0.284343	0.0540273	0.282788	0.11191	0.268969	72.302	translation_only	576.809	692.069	905.157	775.768	230.679	229.855	249.122	252.604	0.268969
ENSMUSG00000033998	Kcnk1	-0.0380891	-0.28971	-0.252572	0.112744	1.24825	0.99663	-0.251664	0.0178571	-0.252572	0.112744	-0.239414	-97.4899	translation_only	1638.91	1608.59	1230.61	1402.83	524.449	822.618	578.497	723.799	-0.239414
ENSMUSG00000003410	Elavl3	0.0471043	0.214042	0.166412	0.112785	-1.49465	-1.32771	0.166871	0.0684905	0.166412	0.112785	0.157717	77.5887	translation_only	2036.92	1870.46	2274.76	2245.51	5663.78	5195.84	5850.84	5294.72	0.157717
ENSMUSG00000046694	Fam46b	0.119516	-0.710323	-0.854053	0.112914	1.52315	0.693309	-0.836487	0.0946737	-0.854053	0.112914	-0.809002	-80.4491	translation_only	61.725	65.4659	37.2911	39.6559	21.0305	22.4249	20.3979	26.5462	-0.809002
ENSMUSG00000021371	Mcur1	-0.0590565	0.379725	0.436648	0.0504116	-1.89349	-1.45471	0.438867	0.114521	0.438867	0.114521	0.413025	98.8401	translation_only	159.634	130.932	196.626	183.408	544.822	526.237	530.345	490.69	0.413025
ENSMUSG00000038225	Primpol	-0.220873	-1.03611	-0.830303	0.079369	-0.285032	-1.10026	-0.825438	0.114914	-0.825438	0.114914	-0.775604	-102.034	translation_only	63.8534	68.5834	40.6812	24.7849	64.406	94.1844	60.8592	74.2464	-0.775604
ENSMUSG00000060427	Zfp868	-0.243834	-0.873532	-0.64268	0.115002	1.02499	0.395291	-0.634684	0.110148	-0.64268	0.115002	-0.603665	-105.596	translation_only	95.7802	130.932	50.8515	69.3977	47.6473	60.9209	44.1396	46.8706	-0.603665
ENSMUSG00000027792	Bche	-0.149136	-0.463871	-0.317657	0.115325	0.829748	0.515014	-0.315612	0.098789	-0.317657	0.115325	-0.297987	-107.823	translation_only	442.717	442.674	281.378	351.946	228.707	261.623	227.72	211.125	-0.297987
ENSMUSG00000031079	Zfp300	-0.346336	0.701186	1.02657	0.115762	-0.00630532	1.04122	1.05398	0.108644	1.02657	0.115762	0.961313	116.286	translation_only	23.4129	21.822	30.5109	42.1343	21.6877	23.1724	14.3788	20.7392	0.961313
ENSMUSG00000049556	Lingo1	-0.0865889	-0.290814	-0.205091	0.116525	1.15712	0.952898	-0.204452	0.0677061	-0.205091	0.116525	-0.191469	-106.581	translation_only	1421.8	1493.25	1095	1261.55	651.289	632.755	614.946	586.09	-0.191469
ENSMUSG00000051246	Msantd1	0.169754	-0.729695	-0.901391	0.0446701	-4.46392	-5.36337	-0.906361	0.116657	-0.906361	0.116657	-0.845716	-76.9039	translation_only	31.9267	84.1705	27.1208	39.6559	1244.42	1206.08	1449.25	1288.32	-0.845716
ENSMUSG00000030789	Itgax	0.281338	1.25338	0.953605	0.116843	-0.1455	0.826547	0.982477	0.105852	0.953605	0.116843	0.88914	77.3489	translation_only	21.2845	21.822	61.0218	42.1343	32.8602	13.8287	25.0793	31.5236	0.88914
ENSMUSG00000030109	Slc6a12	0.208962	-0.702109	-0.937199	0.116845	1.56549	0.65442	-0.920721	0.107021	-0.937199	0.116845	-0.873835	-73.4259	translation_only	61.725	43.644	47.4614	19.8279	16.7587	18.6874	18.7259	21.9836	-0.873835
ENSMUSG00000078762	Haus5	0.301239	-0.775297	-1.11241	0.117679	2.87638	1.79985	-1.08335	0.0518232	-1.11241	0.117679	-1.03376	-68.7666	translation_only	38.3121	81.0531	27.1208	39.6559	8.87225	6.72746	8.35978	10.7844	-1.03376
ENSMUSG00000045259	Klhdc9	0.236016	-0.637067	-0.899013	0.117722	1.57339	0.700313	-0.880462	0.101046	-0.899013	0.117722	-0.83531	-69.6717	translation_only	59.5965	49.8788	27.1208	42.1343	17.7445	18.6874	17.3883	25.3018	-0.83531
ENSMUSG00000056050	Mia3	0.0504486	0.212928	0.162082	0.11838	0.320974	0.483453	0.162418	0.0651124	0.162082	0.11838	0.150205	76.6708	translation_only	2675.46	2344.3	2946	2862.66	1988.37	1978.62	2037.78	2042.81	0.150205
ENSMUSG00000027379	Bub1	0.344957	-0.840494	-1.2351	0.119025	2.36177	1.17632	-1.19988	0.081198	-1.2351	0.119025	-1.14168	-67.6857	translation_only	48.9543	24.9394	13.5604	27.2634	6.24344	8.22245	8.69417	9.54004	-1.14168
ENSMUSG00000032261	Sh3bgrl2	-0.0832897	-0.25212	-0.16956	0.119386	-1.53069	-1.69952	-0.169046	0.119526	-0.169046	0.119526	-0.155951	-108.281	translation_only	1409.03	1533.77	1223.83	1226.85	4126.58	4216.99	3947.15	3874.91	-0.155951
ENSMUSG00000027357	Crls1	-0.00851259	0.357839	0.363748	0.082251	-1.21059	-0.844241	0.366558	0.120564	0.366558	0.120564	0.336788	91.3627	translation_only	212.845	196.398	274.598	250.328	412.067	523.62	435.377	488.201	0.336788
ENSMUSG00000044452	Zfp507	-0.106127	-0.40433	-0.300715	0.11473	0.322191	0.0239878	-0.298711	0.120565	-0.298711	0.120565	-0.274449	-104.707	translation_only	395.891	430.205	311.889	307.333	320.387	327.777	309.646	288.275	-0.274449
ENSMUSG00000026638	Irf6	-0.249459	-0.757104	-0.513464	0.0881241	-0.312689	-0.820334	-0.51014	0.120641	-0.51014	0.120641	-0.468566	-108.237	translation_only	161.762	149.636	74.5822	106.575	163.644	218.269	163.183	155.544	-0.468566
ENSMUSG00000024713	Pcsk5	-0.0549513	-0.353829	-0.301311	0.120715	1.02401	0.725128	-0.299248	0.0885853	-0.301311	0.120715	-0.276675	-98.8278	translation_only	493.8	501.906	413.592	364.338	217.535	264.24	226.049	234.353	-0.276675
ENSMUSG00000028780	Sema3c	0.177331	0.417335	0.238808	0.121189	1.08506	1.32507	0.240184	0.0618944	0.238808	0.121189	0.218877	66.9787	translation_only	791.783	732.595	1047.54	986.439	347.004	362.161	414.98	381.187	0.218877
ENSMUSG00000035576	L3mbtl1	-0.367733	-1.00034	-0.644887	0.121685	1.94275	1.31014	-0.637114	0.0699789	-0.644887	0.121685	-0.589918	-110.184	translation_only	187.303	155.871	122.044	54.5268	48.9617	39.2435	42.4677	25.3018	-0.589918
ENSMUSG00000006476	Nsmf	-0.0364019	-0.448107	-0.414238	0.0593138	-2.27961	-2.69132	-0.412955	0.121952	-0.412955	0.121952	-0.377363	-94.6442	translation_only	225.615	199.515	169.505	143.752	1031.48	1008.37	1023.91	951.515	-0.377363
ENSMUSG00000068615	Gjd2	-0.371683	-1.19221	-0.837494	0.0877257	-0.333768	-1.1543	-0.832387	0.12251	-0.832387	0.12251	-0.758993	-107.315	translation_only	76.6241	52.9962	27.1208	29.7419	62.763	100.164	63.8687	60.9733	-0.758993
ENSMUSG00000038722	Bud31	0.0267552	0.272189	0.244306	0.122974	0.669067	0.914501	0.245379	0.0957044	0.244306	0.122974	0.222364	84.3861	translation_only	740.7	592.311	752.602	855.079	417.325	413.739	433.037	407.733	0.222364
ENSMUSG00000032898	Fbxo21	-0.0897078	-0.250286	-0.161076	0.123223	0.216832	0.0562542	-0.160763	0.0755892	-0.161076	0.123223	-0.146468	-109.719	translation_only	2311.49	2250.78	1864.55	1948.09	1906.22	1959.18	1828.12	1779.42	-0.146468
ENSMUSG00000020261	Slc36a1	-0.0664004	-0.209607	-0.143609	0.123588	-0.809692	-0.952899	-0.143306	0.0652861	-0.143609	0.123588	-0.130401	-107.577	translation_only	3788.64	3759.62	3101.94	3378.18	6298.97	6722.22	6039.78	6310.94	-0.130401
ENSMUSG00000017453	Pipox	-0.13685	0.792476	0.91785	0.0711501	-0.799271	0.130055	0.937431	0.123815	0.937431	0.123815	0.850464	99.7976	translation_only	17.0276	40.5265	37.2911	57.0053	52.9049	41.8597	40.127	45.6263	0.850464
ENSMUSG00000047003	Zfp41	0.251123	-0.736005	-1.00606	0.0734793	-0.388175	-1.3753	-0.99795	0.124233	-0.99795	0.124233	-0.903908	-71.1605	translation_only	31.9267	46.7614	27.1208	19.8279	41.4039	58.6784	60.8592	57.2402	-0.903908
ENSMUSG00000033813	Tcea1	-0.0204337	0.434974	0.452569	0.064158	-1.30975	-0.854338	0.455825	0.124247	0.455825	0.124247	0.412847	92.6896	translation_only	136.221	115.345	186.455	156.145	314.801	303.109	314.662	290.349	0.412847
ENSMUSG00000038533	Cbfa2t2	-0.101328	-0.466755	-0.369025	0.095128	-0.217591	-0.583018	-0.366718	0.124551	-0.366718	0.124551	-0.331752	-102.248	translation_only	263.928	271.216	179.675	203.236	309.543	301.988	265.841	300.719	-0.331752
ENSMUSG00000030029	Lrig1	0.230449	0.486305	0.254473	0.125	0.31379	0.569646	0.255936	0.105561	0.254473	0.125	0.229812	64.6448	translation_only	481.029	448.909	613.608	681.585	357.848	380.475	455.441	404.415	0.229812
ENSMUSG00000022602	Arc	0.247105	0.911415	0.655073	0.125492	0.488388	1.1527	0.668351	0.106886	0.655073	0.125492	0.590472	74.8305	translation_only	57.4681	46.7614	94.9228	101.618	36.4748	37.3748	41.4645	45.6263	0.590472
ENSMUSG00000025199	Chuk	0.0717488	0.438801	0.36483	0.0702975	-1.69327	-1.32622	0.367462	0.125581	0.367462	0.125581	0.331111	80.7137	translation_only	193.689	211.985	308.499	240.414	676.92	608.461	732.317	609.318	0.331111
ENSMUSG00000028455	Stoml2	-0.08828	-0.354698	-0.268459	0.126471	1.33132	1.0649	-0.266594	0.069504	-0.268459	0.126471	-0.241078	-103.976	translation_only	789.654	713.891	616.998	560.139	326.302	263.118	267.513	283.712	-0.241078
ENSMUSG00000044749	Abca6	0.133683	-0.215862	-0.350314	0.126565	5.48723	5.13768	-0.349588	8.09099e-06	-0.350314	0.126565	-0.314472	-58.2301	translation_only	3590.69	3457.23	3081.6	2964.28	72.9497	81.8507	70.5566	98.3039	-0.314472
ENSMUSG00000022129	Dct	-0.0118447	1.09195	1.08363	0.126778	0.204537	1.30833	1.11672	0.107822	1.08363	0.126778	0.971972	90.6215	translation_only	17.0276	18.7046	27.1208	47.0913	15.7729	14.5762	15.382	14.5174	0.971972
ENSMUSG00000040451	Sgms1	0.00952155	0.332244	0.321145	0.0771964	-1.32455	-1.00183	0.322963	0.126993	0.322963	0.126993	0.289446	88.3584	translation_only	297.983	236.924	339.01	337.075	629.273	701.524	660.757	669.462	0.289446
ENSMUSG00000046791	Riox1	0.00531867	-0.423417	-0.432237	0.0889209	-0.0869823	-0.515718	-0.430253	0.127319	-0.430253	0.127319	-0.385122	-89.2803	translation_only	185.175	227.572	118.653	180.93	211.948	216.4	218.692	208.222	-0.385122
ENSMUSG00000059423	Zfp933	-0.136928	0.486536	0.617958	0.0659812	-1.264	-0.640534	0.624428	0.127492	0.624428	0.127492	0.558561	105.718	translation_only	65.9819	59.2311	91.5327	84.2687	136.041	161.459	137.435	131.072	0.558561
ENSMUSG00000026730	Pter	0.0657082	1.01323	0.931256	0.107969	-0.306815	0.640711	0.956429	0.127696	0.956429	0.127696	0.854877	86.2896	translation_only	27.6698	15.5871	47.4614	42.1343	30.8886	23.1724	24.4106	31.9384	0.854877
ENSMUSG00000020836	Coro6	-0.270611	-0.618201	-0.350422	0.128047	2.4541	2.10651	-0.348212	0.0333198	-0.350422	0.128047	-0.312798	-113.641	translation_only	615.121	635.955	400.032	408.951	116.654	107.639	96.3047	88.349	-0.312798
ENSMUSG00000024764	Naa40	0.0844459	0.809327	0.722682	0.0335909	-3.35838	-2.6335	0.729036	0.128923	0.729036	0.128923	0.648602	84.0433	translation_only	51.0828	46.7614	125.434	49.5698	509.333	481.387	575.487	467.462	0.648602
ENSMUSG00000050963	Kcns2	0.344373	-0.712192	-1.10011	0.129013	1.80695	0.750388	-1.06758	0.10987	-1.10011	0.129013	-0.978406	-64.1944	translation_only	34.0552	37.4091	23.7307	19.8279	9.20086	10.8387	10.3661	14.9322	-0.978406
ENSMUSG00000030662	Ipo5	0.108338	0.265344	0.156757	0.129513	0.96119	1.1182	0.156968	0.0547746	0.156757	0.129513	0.139151	67.7902	translation_only	3365.08	2958.44	3783.35	3797.05	1575.98	1629.54	1721.78	1710.16	0.139151
ENSMUSG00000037440	Vnn1	0.0960659	-1.04557	-1.19057	0.131197	2.77185	1.63021	-1.1547	0.0611092	-1.19057	0.131197	-1.05018	-84.7504	translation_only	38.3121	59.2311	27.1208	19.8279	8.21505	5.60621	6.01904	8.71047	-1.05018
ENSMUSG00000050783	Htr1f	0.189929	0.521718	0.328892	0.131882	-0.133833	0.197956	0.33206	0.129814	0.328892	0.131882	0.289364	69.9962	translation_only	214.973	240.042	335.62	312.29	206.362	282.927	281.223	272.513	0.289364
ENSMUSG00000046449	C77370	-0.136784	0.448167	0.579582	0.132914	1.36651	1.95146	0.585617	0.0624515	0.579582	0.132914	0.507962	106.973	translation_only	163.891	87.2879	186.455	163.58	41.4039	56.8096	47.4836	41.0636	0.507962
ENSMUSG00000002778	Kdelr1	0.0481077	0.2223	0.173333	0.133563	-1.42157	-1.24738	0.17429	0.133098	0.173333	0.133563	0.151548	77.789	translation_only	1017.4	1006.93	1166.19	1182.24	2753.03	2583.34	2743.35	2737.58	0.151548
ENSMUSG00000011831	Evi5	-0.170262	-0.361602	-0.192362	0.127689	-1.17907	-1.37041	-0.191465	0.134392	-0.191465	0.134392	-0.166886	-115.214	translation_only	1045.07	1003.81	837.355	755.94	2165.16	2406.19	2078.58	1955.29	-0.166886
ENSMUSG00000009681	Bcr	-0.0698191	-0.244066	-0.175072	0.13446	0.202367	0.0281198	-0.174294	0.100563	-0.175072	0.13446	-0.15256	-105.964	translation_only	1794.28	1571.18	1366.21	1464.79	1496.78	1391.09	1407.45	1325.65	-0.15256
ENSMUSG00000031578	Mak16	-0.117895	-0.559945	-0.449162	0.135495	1.00857	0.566524	-0.443693	0.113156	-0.449162	0.135495	-0.389907	-101.89	translation_only	214.973	183.928	125.434	143.752	83.1363	113.246	80.5883	99.1334	-0.389907
ENSMUSG00000027293	Ehd4	0.107823	0.282376	0.173982	0.136279	0.540461	0.715014	0.174634	0.0727754	0.173982	0.136279	0.150594	69.1011	translation_only	1604.85	1751.99	1952.7	2089.37	1094.24	1170.58	1158.67	1265.51	0.150594
ENSMUSG00000000567	Sox9	0.0035326	0.469245	0.462795	0.0697102	-1.43023	-0.964519	0.466654	0.136622	0.466654	0.136622	0.403412	89.5687	translation_only	104.294	121.58	135.604	171.016	313.158	281.432	282.226	310.259	0.403412
ENSMUSG00000001018	Snapin	-0.121454	-0.379529	-0.259674	0.104354	-1.60759	-1.86567	-0.258517	0.136904	-0.258517	0.136904	-0.223251	-107.745	translation_only	598.094	526.845	372.911	483.306	1550.67	1836.97	1442.23	1650.43	-0.223251
ENSMUSG00000042817	Flt3	-0.0648215	-0.321677	-0.258417	0.137002	1.49822	1.24136	-0.257216	0.0849422	-0.258417	0.137002	-0.223085	-101.393	translation_only	808.81	676.481	579.707	607.23	264.196	256.017	250.125	243.893	-0.223085
ENSMUSG00000002797	Ggct	0.0689862	0.525783	0.453373	0.0922431	-0.638574	-0.181777	0.457893	0.137195	0.457893	0.137195	0.395007	82.5251	translation_only	144.734	90.4053	169.505	173.494	168.573	198.834	177.896	204.903	0.395007
ENSMUSG00000103711	Tstd1	-0.120855	-0.778357	-0.669035	0.106125	0.152056	-0.505446	-0.662805	0.137248	-0.662805	0.137248	-0.571666	-98.8258	translation_only	93.6517	71.7008	44.0713	52.0483	75.2499	72.507	58.8529	76.3203	-0.571666
ENSMUSG00000048612	Myof	-0.0807252	0.447028	0.522433	0.137488	1.79082	2.31857	0.528265	0.0323445	0.522433	0.137488	0.450198	100.236	translation_only	176.661	183.928	250.867	237.935	58.4912	43.7285	48.8211	47.2854	0.450198
ENSMUSG00000067825	Pex26	-0.0307618	-0.392566	-0.364891	0.100877	-0.328448	-0.690253	-0.36303	0.137717	-0.36303	0.137717	-0.312573	-94.4806	translation_only	234.129	268.099	193.236	185.887	296.07	321.423	312.99	287.031	-0.312573
ENSMUSG00000025423	Pias2	-0.0285613	0.393822	0.420066	0.0691451	-1.84199	-1.4196	0.42255	0.140574	0.42255	0.140574	0.360053	94.148	translation_only	151.12	121.58	189.846	171.016	464.315	506.802	499.581	445.478	0.360053
ENSMUSG00000031668	Eif2ak3	0.0623925	0.249661	0.186487	0.140655	0.105584	0.292853	0.187337	0.111042	0.186487	0.140655	0.158858	75.9687	translation_only	1023.78	953.932	1183.14	1162.41	893.469	919.793	947.999	932.435	0.158858
ENSMUSG00000007867	Ift43	-0.0377165	-0.514643	-0.481433	0.0898873	-0.563964	-1.04089	-0.47901	0.14072	-0.47901	0.14072	-0.407946	-94.1915	translation_only	157.505	134.049	88.1426	114.011	214.577	211.915	212.673	199.926	-0.407946
ENSMUSG00000053985	Zfp14	-0.298605	-0.91848	-0.63475	0.141716	0.93048	0.310605	-0.625096	0.141213	-0.63475	0.141716	-0.538636	-108.01	translation_only	93.6517	99.7576	61.0218	42.1343	50.2761	49.3347	37.7862	42.7228	-0.538636
ENSMUSG00000032322	Pstpip1	-0.290034	-0.716301	-0.432745	0.142352	1.09701	0.670748	-0.42805	0.119985	-0.432745	0.142352	-0.366378	-112.043	translation_only	217.102	211.985	125.434	133.839	102.524	94.9319	85.2698	75.076	-0.366378
ENSMUSG00000045948	Mrps12	-0.102054	-0.345601	-0.244871	0.10835	-1.22225	-1.4658	-0.24409	0.142405	-0.24409	0.142405	-0.206616	-106.451	translation_only	553.396	676.481	444.103	508.091	1495.14	1308.86	1300.78	1294.96	-0.206616
ENSMUSG00000076432	Ywhaq	-0.18656	0.761312	0.946845	0.0319669	-7.06783	-6.11996	0.953604	0.142878	0.953604	0.142878	0.805828	103.769	translation_only	29.7983	15.5871	47.4614	32.2204	2900.57	3268.05	2777.79	2604.43	0.805828
ENSMUSG00000047658	Gal3st3	-0.13333	-0.833818	-0.711776	0.0961196	-0.238747	-0.939235	-0.707606	0.143161	-0.707606	0.143161	-0.597343	-99.0849	translation_only	59.5965	90.4053	37.2911	44.6128	89.3798	82.2245	79.9195	75.4907	-0.597343
ENSMUSG00000014496	Ankrd28	0.0246546	0.375696	0.34876	0.1141	-0.0865842	0.264456	0.351416	0.14353	0.351416	0.14353	0.296264	86.2454	translation_only	272.441	202.633	372.911	252.806	244.48	257.138	267.179	239.331	0.296264
ENSMUSG00000024304	Cdh2	0.0602526	0.250331	0.189863	0.143944	2.70706	2.89714	0.190125	0.013626	0.189863	0.143944	0.159828	76.4668	translation_only	3160.75	3083.13	3773.18	3623.55	450.185	491.478	469.151	506.037	0.159828
ENSMUSG00000034310	Tmem132d	0.0918055	0.811533	0.712711	0.0776175	-1.11746	-0.39773	0.723898	0.14516	0.723898	0.14516	0.606736	83.5458	translation_only	40.4405	34.2917	64.4119	66.9193	77.8787	82.972	91.2888	78.809	0.606736
ENSMUSG00000036564	Ndrg4	-0.0803855	-0.19595	-0.11552	0.145224	0.053916	-0.0616479	-0.115518	0.0265603	-0.11552	0.145224	-0.0968015	-112.305	translation_only	41372.8	42499.9	35446.9	37340.9	40677	38804.3	37461.2	37212	-0.0968015
ENSMUSG00000028949	Smarcd3	-0.180052	-0.542111	-0.3662	0.139823	0.465669	0.10361	-0.363126	0.145769	-0.363126	0.145769	-0.303695	-108.373	translation_only	249.028	258.746	152.554	190.844	192.889	168.186	168.868	147.663	-0.303695
ENSMUSG00000024360	Etf1	0.0758922	0.240055	0.16361	0.146227	-0.0271419	0.137021	0.164276	0.100874	0.16361	0.146227	0.13661	72.4559	translation_only	1568.67	1493.25	1871.33	1737.42	1485.94	1589.17	1587.69	1631.35	0.13661
ENSMUSG00000026442	Nfasc	-0.100928	-0.237104	-0.136446	0.146411	0.847839	0.711663	-0.136303	0.0552376	-0.136446	0.146411	-0.113855	-113.058	translation_only	5189.16	5265.33	4556.29	4272.92	2755.99	2958.21	2674.46	2616.87	-0.113855
ENSMUSG00000050511	Oprd1	-0.312396	-0.936903	-0.632833	0.147106	3.67676	3.05225	-0.626248	0.00965615	-0.632833	0.147106	-0.526752	-108.44	translation_only	312.882	302.39	176.285	146.231	19.0589	28.4048	22.0698	15.7618	-0.526752
ENSMUSG00000041488	Stx3	-0.135724	0.709731	0.840245	0.0450203	-3.74702	-2.90157	0.851423	0.14734	0.851423	0.14734	0.708112	100.826	translation_only	25.5414	31.1743	44.0713	47.0913	378.221	363.656	395.919	274.172	0.708112
ENSMUSG00000042228	Lyn	-0.0776807	0.467206	0.540488	0.0747965	-1.44647	-0.901582	0.546022	0.147935	0.546022	0.147935	0.45316	99.44	translation_only	80.881	68.5834	108.483	99.1396	209.648	193.975	187.594	192.46	0.45316
ENSMUSG00000032679	Cd59a	0.113403	0.277024	0.16287	0.147988	-0.395554	-0.231933	0.163579	0.118488	0.16287	0.147988	0.135145	67.7377	translation_only	1274.94	1365.43	1549.28	1620.93	1734.36	1674.39	1810.73	1852.43	0.135145
ENSMUSG00000026749	Nek6	0.151264	0.465601	0.31152	0.148647	0.372091	0.686427	0.314478	0.134257	0.31152	0.148647	0.25789	72.0021	translation_only	240.515	264.981	335.62	354.424	178.76	204.066	201.972	220.25	0.25789
ENSMUSG00000071359	Tbpl1	0.0860992	0.509773	0.422078	0.0548893	-3.34779	-2.92411	0.424475	0.148743	0.424475	0.148743	0.35128	80.4134	translation_only	119.193	143.402	213.576	158.623	1260.85	1348.86	1352.61	1398.65	0.35128
ENSMUSG00000021418	Rpp40	-0.0886898	0.366968	0.450174	0.150989	0.909789	1.36545	0.456083	0.0809286	0.450174	0.150989	0.369618	103.587	translation_only	163.891	165.224	216.966	205.715	69.0064	103.528	71.8941	89.1786	0.369618
ENSMUSG00000042050	Wdr60	-0.200719	-0.621626	-0.426813	0.137936	0.303562	-0.117346	-0.423187	0.152065	-0.423187	0.152065	-0.346155	-107.895	translation_only	195.817	171.458	105.093	131.36	162.001	131.933	139.107	114.895	-0.346155
ENSMUSG00000034724	Cnot6l	-0.0342302	0.397786	0.429777	0.0670146	-2.50039	-2.06837	0.432512	0.152674	0.432512	0.152674	0.353031	94.9183	translation_only	125.578	118.462	176.285	146.231	694.336	667.513	696.871	623.836	0.353031
ENSMUSG00000070327	Rnf213	-0.0284717	0.226629	0.254194	0.152769	2.92622	3.18132	0.255181	0.0182213	0.254194	0.152769	0.207413	97.1606	translation_only	1532.48	1518.19	1949.31	1615.98	190.261	204.814	198.294	186.238	0.207413
ENSMUSG00000106864	Gtf3c2	-0.157517	-0.765085	-0.610512	0.0734189	-3.53216	-4.13973	-0.612648	0.153182	-0.612648	0.153182	-0.499181	-101.634	translation_only	87.2664	90.4053	57.6317	47.0913	933.558	1086.86	862.73	936.168	-0.499181
ENSMUSG00000025198	Erlin1	0.0497518	0.408438	0.356388	0.0874694	-1.47597	-1.11729	0.358802	0.154306	0.358802	0.154306	0.291209	83.055	translation_only	206.459	158.989	264.428	225.543	503.09	507.923	550.408	488.616	0.291209
ENSMUSG00000022999	Lmbr1l	0.255523	0.924214	0.665295	0.0509749	-3.64243	-2.97374	0.6731	0.154374	0.6731	0.154374	0.54617	74.5451	translation_only	53.2112	28.0568	81.3624	76.8332	555.337	472.417	718.941	499.4	0.54617
ENSMUSG00000044502	Bod1	0.164909	0.476043	0.309946	0.073468	-2.87632	-2.56519	0.311397	0.154538	0.311397	0.154538	0.252532	70.8931	translation_only	276.698	221.337	389.861	309.811	1855.62	1774.18	1955.19	2087.61	0.252532
ENSMUSG00000020718	Polg2	0.0210354	-0.699191	-0.732656	0.105757	-0.135321	-0.855548	-0.726688	0.154969	-0.726688	0.154969	-0.588438	-88.2768	translation_only	72.3672	56.1137	54.2416	27.2634	68.6778	71.3858	70.2222	70.9281	-0.588438
ENSMUSG00000030030	1700003E16Rik	-0.0795107	-0.803857	-0.744859	0.145786	0.890015	0.165668	-0.732092	0.155387	-0.732092	0.155387	-0.591958	-95.6488	translation_only	51.0828	84.1705	47.4614	29.7419	41.7325	28.7786	36.4487	29.8645	-0.591958
ENSMUSG00000028741	Mrto4	-0.0180324	-0.524955	-0.512199	0.102337	-0.636033	-1.14296	-0.509128	0.155938	-0.509128	0.155938	-0.410891	-91.9674	translation_only	134.092	109.11	67.802	99.1396	208.662	165.57	186.925	180.431	-0.410891
ENSMUSG00000031065	Cdk16	0.0885113	0.310537	0.221085	0.0999688	-3.58929	-3.36726	0.222112	0.156588	0.222112	0.156588	0.178853	74.091	translation_only	502.314	486.318	600.048	619.623	6019.99	5701.15	6388.88	5990.73	0.178853
ENSMUSG00000043572	Pars2	-0.0235626	-0.587679	-0.575082	0.136361	0.540997	-0.02312	-0.56735	0.157054	-0.56735	0.157054	-0.456121	-92.296	translation_only	91.5233	99.7576	64.4119	61.9623	68.6778	60.1734	62.5312	63.462	-0.456121
ENSMUSG00000026202	Tuba4a	-0.113178	-0.24426	-0.131123	0.157188	1.62144	1.49035	-0.131125	0.0332415	-0.131123	0.157188	-0.105368	-114.861	translation_only	11736.3	12214.1	9661.78	10419.6	3707.62	3948.64	3290.41	3740.52	-0.105368
ENSMUSG00000025407	Gli1	0.140012	0.834558	0.685194	0.106551	-0.920555	-0.226011	0.698966	0.157939	0.698966	0.157939	0.560228	80.4763	translation_only	29.7983	49.8788	71.1921	66.9193	91.0228	53.4459	77.5788	80.8829	0.560228
ENSMUSG00000039470	Zdhhc2	0.175406	0.330182	0.154018	0.155065	-2.85471	-2.69993	0.154835	0.16059	0.154835	0.16059	0.122982	62.0209	translation_only	1147.23	1106.69	1356.04	1459.83	7848.66	8213.85	8712.56	9303.61	0.122982
ENSMUSG00000033730	Egr3	-0.117643	0.60981	0.722082	0.0677352	-2.31212	-1.58466	0.730804	0.161601	0.730804	0.161601	0.578471	100.919	translation_only	42.569	31.1743	50.8515	61.9623	209.977	155.105	169.871	164.669	0.578471
ENSMUSG00000044982	Sft2d3	0.201364	0.803762	0.597203	0.0866264	-0.988401	-0.386004	0.605528	0.16285	0.605528	0.16285	0.477284	75.9353	translation_only	46.8259	62.3485	67.802	116.489	103.838	106.518	118.709	121.532	0.477284
ENSMUSG00000046962	Zbtb21	0.034913	0.360221	0.322746	0.163826	0.907479	1.23279	0.325595	0.11766	0.322746	0.163826	0.253555	84.4641	translation_only	249.028	324.212	359.351	364.338	137.684	159.964	157.833	144.76	0.253555
ENSMUSG00000075334	Rprm	0.140602	0.331141	0.189619	0.144696	-2.03677	-1.84623	0.190516	0.164003	0.190516	0.164003	0.149584	66.994	translation_only	704.516	810.531	864.475	1013.7	3203.21	2881.59	3539.87	3123.33	0.149584
ENSMUSG00000074736	Syndig1	-0.0447554	-0.664391	-0.629374	0.114223	-0.199334	-0.81897	-0.624486	0.164024	-0.624486	0.164024	-0.490279	-93.8538	translation_only	65.9819	102.875	61.0218	44.6128	96.609	91.1944	81.9259	99.1334	-0.490279
ENSMUSG00000022801	Lrch3	0.0825656	0.262616	0.179053	0.164697	-0.235303	-0.0552528	0.180165	0.147652	0.179053	0.164697	0.140255	72.547	translation_only	883.306	847.94	1071.27	1001.31	1028.2	979.592	1079.42	1032.4	0.140255
ENSMUSG00000022155	Mroh2b	0.131751	-0.523655	-0.669998	0.16527	2.6147	1.95929	-0.658564	0.0723571	-0.669998	0.16527	-0.523809	-75.8775	translation_only	144.734	93.5228	91.5327	76.8332	16.1015	22.7986	22.7386	19.4949	-0.523809
ENSMUSG00000025221	Kcnip2	-0.108791	-0.279864	-0.172042	0.159395	-1.09239	-1.26346	-0.171151	0.165301	-0.171151	0.165301	-0.133793	-111.242	translation_only	1042.94	1119.16	850.915	912.085	2357.39	2166.99	2113.69	2054.43	-0.133793
ENSMUSG00000032120	C2cd2l	0.0885941	0.272985	0.183231	0.167703	-0.969695	-0.785304	0.184454	0.159832	0.183231	0.167703	0.142089	72.0198	translation_only	751.342	738.83	891.596	899.692	1517.48	1354.84	1605.41	1428.52	0.142089
ENSMUSG00000044628	Rnf208	-0.134867	-0.519768	-0.387457	0.090809	-2.94517	-3.33007	-0.386572	0.168028	-0.386572	0.168028	-0.299446	-104.546	translation_only	208.588	180.811	132.214	138.795	1588.46	1376.51	1337.57	1345.56	-0.299446
ENSMUSG00000066721	Zfp575	0.0476047	-0.760035	-0.833544	0.147864	0.614731	-0.192908	-0.81741	0.168638	-0.81741	0.168638	-0.631894	-86.416	translation_only	42.569	49.8788	23.7307	29.7419	36.1462	22.7986	36.4487	24.0575	-0.631894
ENSMUSG00000046269	Usp27x	0.131317	-0.75335	-0.907771	0.124569	0.220658	-0.664009	-0.895172	0.16995	-0.895172	0.16995	-0.688995	-80.1121	translation_only	36.1836	40.5265	16.9505	27.2634	30.8886	33.6373	34.1079	36.0862	-0.688995
ENSMUSG00000026023	Cdk15	0.0933818	0.371994	0.276358	0.170025	0.264592	0.543205	0.278993	0.133032	0.276358	0.170025	0.212654	75.9082	translation_only	329.909	342.917	430.543	433.736	254.009	296.382	252.465	330.998	0.212654
ENSMUSG00000044037	Als2cl	-0.0360936	0.943789	0.960975	0.143154	-0.299893	0.679989	0.98821	0.170805	0.98821	0.170805	0.758451	92.1901	translation_only	29.7983	6.23485	44.0713	29.7419	28.5884	17.5661	22.4042	22.3983	0.758451
ENSMUSG00000037134	Prmt9	-0.0963368	-0.32058	-0.225659	0.171351	1.79184	1.5676	-0.224395	0.0603993	-0.225659	0.171351	-0.172881	-106.726	translation_only	1181.29	1187.74	888.206	991.396	293.442	380.101	283.898	341.782	-0.172881
ENSMUSG00000036062	Phf24	-0.113439	-0.238452	-0.125253	0.171661	1.32282	1.19781	-0.125094	0.0247986	-0.125253	0.171661	-0.0958599	-115.442	translation_only	13911.5	14056.5	11661.9	11904.2	5269.79	5730.67	4673.45	5426.21	-0.0958599
ENSMUSG00000034663	Bmp2k	0.231209	0.560173	0.326748	0.117504	-0.683665	-0.3547	0.329559	0.171846	0.329559	0.171846	0.252067	67.5719	translation_only	178.79	218.22	328.84	252.806	302.314	319.928	370.171	355.055	0.252067
ENSMUSG00000037843	Vstm2l	-0.0697715	-0.557404	-0.490066	0.172047	0.448307	-0.0393233	-0.48777	1.04181e-05	-0.490066	0.172047	-0.374583	-97.1347	translation_only	1485.66	1524.42	1030.59	1003.79	1439.28	727.313	1230.23	822.102	-0.374583
ENSMUSG00000098557	Kctd12	0.148895	0.381825	0.231441	0.142529	-0.836637	-0.603708	0.233065	0.172235	0.233065	0.172235	0.178033	68.6963	translation_only	385.249	442.674	525.465	540.311	765.643	680.221	787.826	805.096	0.178033
ENSMUSG00000021254	Gpatch2l	0.0517305	0.310398	0.256939	0.144853	-0.387151	-0.128483	0.258953	0.172583	0.258953	0.172583	0.197581	80.5381	translation_only	317.139	370.974	396.642	443.65	432.112	447.75	458.116	447.552	0.197581
ENSMUSG00000036123	Slc9a3	0.0710403	0.979455	0.888938	0.165079	-0.0642992	0.844115	0.917512	0.173123	0.917512	0.173123	0.698818	85.8516	translation_only	25.5414	12.4697	37.2911	39.6559	21.3591	19.0611	23.073	19.0801	0.698818
ENSMUSG00000020648	Dus4l	-0.176198	0.666394	0.828353	0.154888	-0.0618381	0.780754	0.848683	0.173365	0.848683	0.173365	0.645881	104.81	translation_only	27.6698	28.0568	23.7307	61.9623	26.9454	30.2736	21.7354	28.6201	0.645881
ENSMUSG00000050106	Tmc8	0.024859	-0.946647	-1.01656	0.174164	1.52293	0.551424	-0.989613	0.163292	-1.01656	0.174164	-0.77161	-88.4958	translation_only	48.9543	21.822	20.3406	17.3494	15.4443	9.34369	11.0349	14.1027	-0.77161
ENSMUSG00000079036	Alkbh1	-0.140437	-0.766587	-0.631831	0.0997498	-1.5748	-2.20095	-0.632392	0.174333	-0.632392	0.174333	-0.479746	-100.381	translation_only	74.4957	87.2879	64.4119	32.2204	249.409	222.006	220.364	204.489	-0.479746
ENSMUSG00000071637	Cebpd	0.108525	0.40648	0.296185	0.174544	1.18871	1.48666	0.298361	0.0944207	0.296185	0.174544	0.224536	75.0514	translation_only	378.864	520.61	535.636	632.015	225.75	157.721	214.01	197.023	0.224536
ENSMUSG00000010054	Tusc2	-0.057637	-0.369936	-0.313988	0.0943603	-3.60709	-3.91939	-0.312926	0.174895	-0.312926	0.174895	-0.236954	-98.8556	translation_only	266.056	302.39	200.016	232.978	3511.77	3270.29	3227.88	3245.69	-0.236954
ENSMUSG00000032436	Cmtm7	0.189291	0.743461	0.550375	0.0809405	-2.10557	-1.5514	0.557122	0.175713	0.557122	0.175713	0.420735	75.7156	translation_only	59.5965	52.9962	91.5327	96.6611	267.482	211.541	256.144	287.031	0.420735
ENSMUSG00000038831	Ralgps1	-0.0250016	0.428892	0.451625	0.0828792	-2.182	-1.7281	0.454285	0.177488	0.454285	0.177488	0.341091	93.3362	translation_only	129.835	77.9356	159.335	126.403	460.7	485.872	490.886	432.62	0.341091
ENSMUSG00000073424	Cyp4f15	-0.0188555	-0.597549	-0.591783	0.164767	0.725192	0.146499	-0.583104	0.178568	-0.583104	0.178568	-0.436276	-91.8074	translation_only	91.5233	74.8182	64.4119	47.0913	46.3329	53.4459	54.5058	43.1376	-0.436276
ENSMUSG00000029094	Afap1	0.0923063	0.330166	0.236436	0.147995	-0.62408	-0.38622	0.237854	0.178777	0.237854	0.178777	0.17784	74.3803	translation_only	429.947	423.97	610.218	465.956	658.847	636.492	724.292	647.063	0.17784
ENSMUSG00000020776	Fbf1	0.201546	0.559421	0.354529	0.179411	0.530612	0.888488	0.3587	0.153982	0.354529	0.179411	0.264533	70.1871	translation_only	176.661	180.811	305.109	223.064	138.67	104.276	142.116	135.634	0.264533
ENSMUSG00000018654	Ikzf1	-0.0506279	0.637577	0.681964	0.0907917	-1.64692	-0.958714	0.691618	0.179534	0.691618	0.179534	0.515846	94.5401	translation_only	48.9543	28.0568	71.1921	52.0483	133.412	109.508	106.002	127.339	0.515846
ENSMUSG00000035697	Arhgap45	0.0915787	0.519664	0.422162	0.17634	-0.435719	-0.00763419	0.428741	0.180221	0.428741	0.180221	0.319067	80.0056	translation_only	104.294	99.7576	142.384	148.709	172.187	99.4169	151.814	136.049	0.319067
ENSMUSG00000049488	Tmem67	0.036176	0.441421	0.400652	0.180491	1.01534	1.42059	0.405864	0.123233	0.400652	0.180491	0.297902	85.3149	translation_only	155.377	171.458	244.087	198.279	73.2783	85.2145	81.2571	80.0534	0.297902
ENSMUSG00000061184	Tmprss11c	-0.37974	-1.09127	-0.736866	0.180953	1.57261	0.861081	-0.720299	0.145623	-0.736866	0.180953	-0.547074	-109.187	translation_only	91.5233	59.2311	33.901	37.1774	20.3733	30.2736	20.7323	17.8357	-0.547074
ENSMUSG00000038670	Mybpc2	0.348339	-0.560952	-0.926579	0.181394	4.22602	3.31673	-0.912523	0.0224175	-0.926579	0.181394	-0.686945	-58.1606	translation_only	87.2664	171.458	115.263	59.4838	2.95742	10.4649	11.0349	5.80698	-0.686945
ENSMUSG00000028039	Efna3	0.122422	-0.687841	-0.822208	0.109986	-0.89686	-1.70712	-0.819791	0.181615	-0.819791	0.181615	-0.607341	-79.9082	translation_only	38.3121	46.7614	30.5109	22.3064	76.2357	78.487	76.5756	90.8378	-0.607341
ENSMUSG00000038543	BC028528	0.0196073	-0.686992	-0.729217	0.179431	1.06368	0.35708	-0.713594	0.182075	-0.713594	0.182075	-0.527881	-88.3652	translation_only	63.8534	46.7614	37.2911	32.2204	24.6452	28.0311	22.4042	30.694	-0.527881
ENSMUSG00000041515	Irf8	0.188133	0.686045	0.491228	0.134088	-1.21733	-0.719422	0.49964	0.182206	0.49964	0.182206	0.369453	74.6648	translation_only	65.9819	74.8182	115.263	109.054	203.733	115.862	174.887	187.482	0.369453
ENSMUSG00000034738	Nostrin	-0.314087	0.687866	0.980572	0.183019	0.920715	1.92267	1.00789	0.0950477	0.980572	0.183019	0.723177	114.542	translation_only	31.9267	21.822	37.2911	49.5698	16.4301	11.9599	10.7005	12.0287	0.723177
ENSMUSG00000038354	Ankrd35	-0.146728	-0.610432	-0.472467	0.183238	2.31048	1.84677	-0.465173	0.0853879	-0.472467	0.183238	-0.348201	-103.516	translation_only	208.588	224.455	145.774	136.317	43.0469	42.6072	35.4455	41.4784	-0.348201
ENSMUSG00000070337	Gpr179	0.0521669	-0.615322	-0.686229	0.184212	2.2529	1.58541	-0.671864	0.100807	-0.686229	0.184212	-0.50416	-85.1541	translation_only	87.2664	99.7576	64.4119	57.0053	19.7161	18.6874	25.7481	13.6879	-0.50416
ENSMUSG00000020680	Taf15	0.160689	0.382195	0.219683	0.184607	-1.07113	-0.849628	0.221658	0.169656	0.219683	0.184607	0.161193	67.1964	translation_only	442.717	476.966	610.218	579.967	1011.11	883.539	1216.52	886.809	0.161193
ENSMUSG00000022122	Ednrb	0.0810012	0.244937	0.163626	0.184622	0.502049	0.665985	0.163886	0.0386674	0.163626	0.184622	0.120055	71.7008	translation_only	3207.57	2967.79	3549.43	3735.09	1839.19	2461.88	2094.96	2421.93	0.120055
ENSMUSG00000041809	Efhc1	-0.0211741	-0.63797	-0.632453	0.185042	2.46119	1.84439	-0.619687	0.0871853	-0.632453	0.185042	-0.463417	-91.9009	translation_only	119.193	124.697	64.4119	89.2257	17.4159	26.1623	19.3947	23.2279	-0.463417
ENSMUSG00000034416	Pkd1l2	0.108513	0.719446	0.602358	0.14432	-0.412683	0.19825	0.614214	0.18528	0.614214	0.18528	0.44971	81.4228	translation_only	48.9543	40.5265	67.802	79.3117	58.8198	59.4259	55.8433	70.9281	0.44971
ENSMUSG00000068184	Ndufaf2	-0.26486	-0.555815	-0.294252	0.185427	1.00226	0.711302	-0.292019	0.154863	-0.294252	0.185427	-0.215341	-115.479	translation_only	391.634	380.326	233.917	285.026	173.83	205.935	161.845	151.811	-0.215341
ENSMUSG00000019189	Rnf145	0.0899103	0.251702	0.161029	0.1797	-1.22077	-1.05898	0.161857	0.185827	0.161857	0.185827	0.1183	70.3428	translation_only	934.389	863.527	1061.1	1073.19	2014.99	2120.27	2233.4	2137.38	0.1183
ENSMUSG00000041757	Plekha6	-0.145889	-0.278103	-0.132448	0.185878	0.802669	0.670455	-0.132181	0.0754141	-0.132448	0.185878	-0.0967893	-117.681	translation_only	4903.94	5056.46	4271.53	3906.1	2919.96	2693.97	2672.79	2367.17	-0.0967893
ENSMUSG00000029017	Pmpcb	-0.117081	-0.333754	-0.218205	0.187024	1.80124	1.58457	-0.216944	0.0668966	-0.218205	0.187024	-0.158876	-109.331	translation_only	1262.17	1203.33	915.327	1026.1	312.501	384.96	277.21	361.692	-0.158876
ENSMUSG00000056501	Cebpb	0.0389528	0.344317	0.302436	0.188368	0.275672	0.581037	0.305409	0.131657	0.302436	0.188368	0.219264	83.5455	translation_only	274.57	296.155	372.911	346.989	281.941	179.773	246.446	225.228	0.219264
ENSMUSG00000029128	Rab28	-0.105497	-0.559951	-0.457001	0.0983063	-3.16323	-3.61768	-0.457432	0.188409	-0.457432	0.188409	-0.331592	-100.67	translation_only	163.891	109.11	77.9723	106.575	1232.26	1206.08	1086.1	1165.54	-0.331592
ENSMUSG00000034255	Arhgap27	-0.114606	-0.372949	-0.260893	0.176612	0.24286	-0.0154826	-0.25903	0.189314	-0.25903	0.189314	-0.187231	-107.082	translation_only	374.607	414.618	281.378	319.725	337.803	315.817	294.599	305.281	-0.187231
ENSMUSG00000034401	Spata6	-0.12624	-0.488954	-0.366892	0.151929	-0.0828912	-0.445606	-0.364267	0.189352	-0.364267	0.189352	-0.263267	-104.477	translation_only	195.817	208.868	122.044	161.102	195.19	225.744	193.278	189.556	-0.263267
ENSMUSG00000079278	Tmem233	-0.210752	-0.354848	-0.144519	0.189511	-1.39637	-1.54047	-0.144251	0.0685824	-0.144519	0.189511	-0.104396	-120.707	translation_only	4212.2	3831.32	3074.82	3187.34	9112.46	11769.3	8300.26	9615.53	-0.104396
ENSMUSG00000047749	Zc3hav1l	-0.00671792	-0.736629	-0.738083	0.110769	-1.4828	-2.21271	-0.738373	0.190786	-0.738373	0.190786	-0.531224	-90.5225	translation_only	46.8259	56.1137	37.2911	24.7849	146.557	134.549	137.435	140.612	-0.531224
ENSMUSG00000022010	Tsc22d1	0.0371727	0.160668	0.123158	0.191224	-0.659199	-0.535703	0.123415	0.0715831	0.123158	0.191224	0.0884835	76.9731	translation_only	5410.52	5246.63	5705.54	6134.26	7822.7	8749.06	8763.39	8122.72	0.0884835
ENSMUSG00000042254	Cilp	0.0184772	-0.59133	-0.620503	0.191697	3.4716	2.86179	-0.611453	0.0328407	-0.620503	0.191697	-0.44514	-88.2103	translation_only	185.175	199.515	115.263	136.317	16.1015	17.9399	20.0635	14.1027	-0.44514
ENSMUSG00000037759	Ptger2	0.047037	-0.84737	-0.913219	0.128685	-0.5452	-1.43961	-0.908737	0.193639	-0.908737	0.193639	-0.647935	-86.8228	translation_only	36.1836	31.1743	20.3406	17.3494	48.6331	48.5872	52.8338	46.8706	-0.647935
ENSMUSG00000027752	Exosc8	0.0943716	0.523086	0.423436	0.194012	0.74381	1.17252	0.429423	0.16643	0.423436	0.194012	0.301559	79.7731	translation_only	121.322	115.345	206.796	136.317	68.3492	71.012	71.8941	75.9055	0.301559
ENSMUSG00000037315	Jade3	0.0782227	0.555125	0.471363	0.153259	-0.349372	0.127531	0.478401	0.194958	0.478401	0.194958	0.339693	81.9793	translation_only	91.5233	62.3485	111.873	116.489	98.5806	97.5481	111.352	94.156	0.339693
ENSMUSG00000013236	Ptprs	-0.0875963	-0.208726	-0.121278	0.195971	0.938358	0.817228	-0.121094	0.059882	-0.121278	0.195971	-0.0858419	-112.766	translation_only	8130.67	7700.04	6936.14	6704.32	4187.7	3946.03	4047.14	3555.95	-0.0858419
ENSMUSG00000073609	D2hgdh	-0.0631426	-0.485518	-0.428438	0.152486	-0.0830466	-0.505422	-0.424317	0.19698	-0.424317	0.19698	-0.299388	-97.4098	translation_only	134.092	143.402	91.5327	104.097	138.67	149.873	137.769	136.464	-0.299388
ENSMUSG00000061046	Haghl	-0.114075	-0.41606	-0.303285	0.197502	0.309789	0.00780464	-0.302112	0.00453968	-0.303285	0.197502	-0.213642	-105.333	translation_only	1611.24	1792.52	1237.39	1288.82	1652.54	1039.02	1277.37	1194.58	-0.213642
ENSMUSG00000098112	Bin2	0.0146059	1.04247	1.01082	0.197674	1.66104	2.6889	1.03525	0.046255	1.01082	0.197674	0.71167	89.1973	translation_only	31.9267	31.1743	67.802	61.9623	9.20086	10.4649	9.36296	10.3696	0.71167
ENSMUSG00000096188	Cmtm4	-0.115267	-0.531845	-0.419309	0.107899	-2.93649	-3.35307	-0.419011	0.197688	-0.419011	0.197688	-0.294992	-102.229	translation_only	138.349	149.636	98.3129	99.1396	1125.79	1036.4	1022.23	960.64	-0.294992
ENSMUSG00000070690	5830473C10Rik	0.0309571	-0.832988	-0.903106	0.19825	1.56512	0.701177	-0.876181	0.181758	-0.903106	0.19825	-0.63469	-87.8716	translation_only	51.0828	28.0568	16.9505	27.2634	11.1725	15.6974	10.7005	16.5914	-0.63469
ENSMUSG00000024683	Mrpl16	-0.11286	-0.375394	-0.265258	0.198277	1.59504	1.33251	-0.263065	0.124121	-0.265258	0.198277	-0.186404	-106.733	translation_only	570.424	570.489	376.301	490.741	166.273	205.561	158.167	183.335	-0.186404
ENSMUSG00000027433	Xrn2	0.151967	0.353565	0.200364	0.198618	1.31989	1.52149	0.201728	0.112619	0.200364	0.198618	0.140652	66.7413	translation_only	855.636	766.887	1003.47	1063.27	318.415	323.665	353.117	355.47	0.140652
ENSMUSG00000039485	Tspyl4	-0.174831	-0.290342	-0.115787	0.200217	1.10962	0.994105	-0.115513	0.0535124	-0.115787	0.200217	-0.0808771	-121.054	translation_only	9639.74	9564.26	7702.31	7908.86	4125.6	4633.35	3947.15	3757.95	-0.0808771
ENSMUSG00000039275	Foxk2	0.202465	0.420268	0.216366	0.171849	-0.754498	-0.536695	0.218018	0.200334	0.218018	0.200334	0.15223	64.2775	translation_only	412.919	383.443	535.636	527.919	623.358	703.019	772.778	742.464	0.15223
ENSMUSG00000075602	Ly6a	0.064398	0.321039	0.254573	0.157929	-1.27695	-1.02031	0.256728	0.201827	0.256728	0.201827	0.178431	78.6574	translation_only	278.827	308.625	376.301	351.946	763.671	630.138	694.196	754.493	0.178431
ENSMUSG00000003354	Ccdc65	-0.0377829	-0.855809	-0.846575	0.202034	3.28524	2.46721	-0.824039	0.0623946	-0.846575	0.202034	-0.58801	-92.5279	translation_only	80.881	93.5228	54.2416	42.1343	8.54365	8.96994	7.02222	9.95482	-0.58801
ENSMUSG00000098022	Zfp82	0.0599362	0.887827	0.816745	0.123935	-1.05573	-0.227838	0.836463	0.202478	0.836463	0.202478	0.580188	86.1379	translation_only	29.7983	12.4697	44.0713	37.1774	42.0611	47.8397	49.8243	43.1376	0.580188
ENSMUSG00000054196	Cthrc1	-0.276419	-0.685393	-0.413304	0.147939	-0.542592	-0.951566	-0.411311	0.204145	-0.411311	0.204145	-0.28383	-111.964	translation_only	195.817	130.932	111.873	94.1827	226.735	247.795	193.278	195.778	-0.28383
ENSMUSG00000030346	Rad51ap1	-0.0954904	-0.923319	-0.861633	0.185921	0.723743	-0.104085	-0.843254	0.205852	-0.843254	0.205852	-0.578848	-95.9046	translation_only	40.4405	37.4091	27.1208	14.8709	23.3307	23.1724	27.7545	15.347	-0.578848
ENSMUSG00000067629	Syngap1	0.21505	0.505665	0.287597	0.193318	-0.757781	-0.467166	0.291013	0.206598	0.291013	0.206598	0.199307	66.9608	translation_only	189.432	243.159	318.669	287.505	406.809	304.604	471.492	348.834	0.199307
ENSMUSG00000027660	Skil	0.0433478	0.348372	0.302947	0.142969	-0.876932	-0.571908	0.305009	0.206609	0.305009	0.206609	0.208886	82.9072	translation_only	234.129	208.868	339.01	230.5	393.994	410.001	425.68	396.949	0.208886
ENSMUSG00000050821	Fam131a	-0.195002	-0.412954	-0.219804	0.165298	-1.59126	-1.80921	-0.218409	0.206726	-0.218409	0.206726	-0.149524	-115.277	translation_only	515.084	558.019	366.131	428.779	1676.2	1495.36	1464.97	1287.08	-0.149524
ENSMUSG00000029103	Lrpap1	-0.056013	-0.204222	-0.14861	0.20697	2.7084	2.56019	-0.148263	0.0389162	-0.14861	0.20697	-0.101663	-105.338	translation_only	5155.1	4878.77	4207.11	4453.85	774.844	737.03	654.404	790.994	-0.101663
ENSMUSG00000055027	Smyd1	-0.150344	-0.825063	-0.692007	0.165935	0.0860403	-0.58868	-0.683769	0.207541	-0.683769	0.207541	-0.466944	-100.327	translation_only	53.2112	59.2311	30.5109	32.2204	49.2903	54.5672	54.1714	38.5749	-0.466944
ENSMUSG00000021496	Pcbd2	0.0472623	0.355584	0.306321	0.13381	-1.41427	-1.10595	0.308851	0.207785	0.308851	0.207785	0.210756	82.4289	translation_only	214.973	171.458	237.307	257.763	490.931	532.217	507.94	542.123	0.210756
ENSMUSG00000028630	Dyrk2	0.062966	0.515854	0.450653	0.0913803	-3.00871	-2.55582	0.454322	0.208584	0.454322	0.208584	0.309266	83.0408	translation_only	97.9086	68.5834	135.604	106.575	661.147	677.604	703.225	685.638	0.309266
ENSMUSG00000031847	1700030J22Rik	0.0567741	-0.603197	-0.681165	0.195332	0.919284	0.259313	-0.666185	0.209231	-0.666185	0.209231	-0.45259	-84.623	translation_only	48.9543	62.3485	40.6812	32.2204	25.3024	32.1423	29.4264	29.8645	-0.45259
ENSMUSG00000039252	Lgi2	-0.152767	-0.299418	-0.14751	0.210066	-0.705367	-0.852018	-0.146956	0.206499	-0.14751	0.210066	-0.0999591	-117.031	translation_only	1200.44	1243.85	969.568	1001.31	1931.52	1985.35	1764.25	1735.04	-0.0999591
ENSMUSG00000018381	Abi3	0.187978	0.979495	0.773217	0.19962	-0.215927	0.575591	0.801956	0.210417	0.801956	0.210417	0.542859	79.1363	translation_only	21.2845	21.822	33.901	49.5698	31.8744	17.1924	29.092	26.5462	0.542859
ENSMUSG00000023027	Atf1	-0.0253502	0.617012	0.637835	0.0937911	-2.46251	-1.82015	0.645638	0.212396	0.645638	0.212396	0.43442	92.3527	translation_only	38.3121	37.4091	47.4614	66.9193	204.39	206.682	205.316	195.778	0.43442
ENSMUSG00000044927	H1fx	-0.133364	-0.377343	-0.246675	0.214032	0.696263	0.452284	-0.244203	0.120198	-0.246675	0.214032	-0.165154	-109.465	translation_only	685.36	676.481	457.663	577.488	503.09	323.292	442.065	306.526	-0.165154
ENSMUSG00000045466	Zfp956	-0.127184	-0.518768	-0.397839	0.176985	-0.185809	-0.577393	-0.393514	0.214217	-0.393514	0.214217	-0.263319	-103.775	translation_only	153.248	149.636	94.9228	114.011	184.674	154.358	174.218	133.975	-0.263319
ENSMUSG00000016349	Eef1a2	0.17794	-0.184713	-0.362231	0.21425	2.90417	2.54152	-0.362728	4.31828e-13	-0.362231	0.21425	-0.242361	-46.0699	translation_only	40647	40941.2	35087.5	36280.1	6971.62	3741.96	6471.81	5577.19	-0.242361
ENSMUSG00000020743	Mif4gd	0.044691	0.536059	0.488775	0.102922	-2.23589	-1.74452	0.493629	0.21544	0.493629	0.21544	0.32909	85.2343	translation_only	53.2112	102.875	88.1426	128.882	387.75	316.564	368.165	353.811	0.32909
ENSMUSG00000032381	Fam96a	-0.0420669	-0.784519	-0.745922	0.121537	-3.78953	-4.53199	-0.754431	0.218666	-0.754431	0.218666	-0.498089	-93.0693	translation_only	55.3396	34.2917	33.901	19.8279	571.439	668.261	580.503	615.125	-0.498089
ENSMUSG00000030056	Isy1	-0.257422	-1.02878	-0.775667	0.126734	-3.25083	-4.02219	-0.784407	0.219263	-0.784407	0.219263	-0.516952	-104.048	translation_only	34.0552	56.1137	23.7307	19.8279	438.355	391.687	368.165	321.458	-0.516952
ENSMUSG00000022779	Top3b	-0.14146	-0.411674	-0.273332	0.221421	1.75052	1.48031	-0.270759	0.143609	-0.273332	0.221421	-0.178972	-108.964	translation_only	461.873	480.084	308.499	389.123	145.242	129.69	127.737	119.873	-0.178972
ENSMUSG00000040209	Zfp704	0.0592843	0.57684	0.514023	0.100841	-2.78985	-2.2723	0.519728	0.221605	0.519728	0.221605	0.34012	84.1321	translation_only	63.8534	49.8788	94.9228	76.8332	398.594	383.839	424.677	384.92	0.34012
ENSMUSG00000015134	Aldh1a3	-0.0593148	-0.566458	-0.516534	0.177327	0.0593924	-0.447751	-0.51098	0.221923	-0.51098	0.221923	-0.334078	-95.9778	translation_only	89.3948	84.1705	54.2416	61.9623	80.1789	84.0932	84.2666	72.1725	-0.334078
ENSMUSG00000016552	Foxred2	-0.0878816	-0.464422	-0.383684	0.214706	0.672198	0.295658	-0.378755	0.221965	-0.378755	0.221965	-0.247598	-100.715	translation_only	153.248	158.989	122.044	104.097	97.9234	94.5581	82.5946	97.4743	-0.247598
ENSMUSG00000030399	Ckm	0.165828	-0.908127	-1.07797	0.221988	2.36088	1.28692	-1.07538	0.210357	-1.07797	0.221988	-0.704637	-79.6515	translation_only	332.038	941.463	444.103	230.5	58.8198	185.379	186.925	84.616	-0.704637
ENSMUSG00000040998	Npnt	0.0830013	0.552988	0.46306	0.190697	-0.327905	0.142081	0.471943	0.222437	0.471943	0.222437	0.308081	81.4639	translation_only	59.5965	84.1705	105.093	101.618	85.1079	89.6994	75.9068	108.259	0.308081
ENSMUSG00000067028	Cntnap5b	-0.0805852	-0.476823	-0.40306	0.20279	0.490916	0.0946777	-0.398252	0.223481	-0.398252	0.223481	-0.259166	-99.5926	translation_only	172.404	124.697	125.434	91.7042	97.9234	112.498	90.2856	107.429	-0.259166
ENSMUSG00000025017	Pik3ap1	-0.0139049	0.550371	0.55723	0.223529	2.06316	2.62743	0.565108	0.0693369	0.55723	0.223529	0.362571	91.4472	translation_only	95.7802	143.402	149.164	190.844	29.9028	25.4148	27.0857	27.3758	0.362571
ENSMUSG00000022223	Sdr39u1	-0.129557	-0.307374	-0.17938	0.218093	-0.314281	-0.492098	-0.178029	0.224039	-0.178029	0.224039	-0.115661	-112.855	translation_only	740.7	735.712	549.196	632.015	925.343	880.923	771.775	868.973	-0.115661
ENSMUSG00000074102	Rbm15b	0.130925	0.363772	0.231137	0.175393	-0.962884	-0.730037	0.233253	0.224457	0.233253	0.224457	0.15135	70.2057	translation_only	304.368	358.504	393.252	446.128	626.644	636.118	724.626	648.308	0.15135
ENSMUSG00000030994	D7Ertd443e	-0.00871591	0.467328	0.468163	0.224938	0.267048	0.743093	0.47764	0.21232	0.468163	0.224938	0.303341	91.0685	translation_only	78.7526	68.5834	88.1426	114.011	49.6189	71.7595	59.5216	60.1437	0.303341
ENSMUSG00000020231	Dip2a	-0.17147	-0.334918	-0.164825	0.225787	0.102898	-0.0605504	-0.163599	0.186262	-0.164825	0.225787	-0.106527	-117.111	translation_only	1074.87	1044.34	820.404	850.122	963.79	979.592	936.296	776.891	-0.106527
ENSMUSG00000027419	Pcsk2	-0.116613	-0.244135	-0.127661	0.226191	1.8415	1.71398	-0.127561	0.0440108	-0.127661	0.226191	-0.0824081	-115.532	translation_only	7219.7	7191.9	6075.06	6027.69	1793.51	2164.75	1682.32	1943.26	-0.0824081
ENSMUSG00000040044	Orc3	-0.00747893	0.249699	0.25573	0.227061	2.01058	2.26776	0.257343	0.0621629	0.25573	0.227061	0.164653	91.7156	translation_only	676.846	673.364	776.333	817.902	138.013	192.106	164.855	160.936	0.164653
ENSMUSG00000015133	Lrrk1	-0.130126	-0.426178	-0.300013	0.227284	1.30558	1.00953	-0.29713	0.176863	-0.300013	0.227284	-0.193038	-106.979	translation_only	312.882	317.977	213.576	250.328	136.041	114.741	123.056	104.526	-0.193038
ENSMUSG00000020325	Fstl3	0.004925	0.525318	0.512975	0.172989	-0.957579	-0.437186	0.522711	0.228055	0.522711	0.228055	0.33556	89.4629	translation_only	48.9543	65.4659	88.1426	74.3547	126.512	88.9519	89.6169	125.68	0.33556
ENSMUSG00000057182	Scn3a	0.104181	0.587064	0.47626	0.178453	-0.574533	-0.0916506	0.485035	0.228282	0.485035	0.228282	0.311164	79.937	translation_only	65.9819	59.2311	88.1426	99.1396	85.4365	99.0431	110.349	86.2751	0.311164
ENSMUSG00000032398	Snapc5	-0.0899126	-0.400745	-0.315041	0.22829	1.71219	1.40136	-0.311378	0.139279	-0.315041	0.22829	-0.202103	-102.646	translation_only	340.552	333.565	244.087	262.72	88.3939	114.367	82.2603	107.014	-0.202103
ENSMUSG00000048616	Nog	-0.275848	-0.612965	-0.341606	0.192313	-0.294744	-0.631861	-0.338911	0.228433	-0.338911	0.228433	-0.217323	-114.229	translation_only	227.744	183.928	118.653	148.709	213.92	287.038	207.323	203.244	-0.217323
ENSMUSG00000031796	Cfap20	-0.17124	-0.396619	-0.228054	0.22931	0.621405	0.396026	-0.22608	0.215082	-0.228054	0.22931	-0.145858	-113.352	translation_only	457.616	467.614	328.84	366.817	281.612	309.837	250.459	271.269	-0.145858
ENSMUSG00000009927	Rps25	0.0273432	0.649444	0.610922	0.206143	-0.0771089	0.544991	0.625888	0.229505	0.625888	0.229505	0.400073	87.5891	translation_only	44.6974	31.1743	44.0713	74.3547	34.5032	45.5972	39.1238	41.8932	0.400073
ENSMUSG00000035476	Tab3	-0.217892	-0.418806	-0.202867	0.224843	0.140502	-0.0604121	-0.201469	0.229825	-0.201469	0.229825	-0.128659	-117.487	translation_only	553.396	604.781	393.252	460.999	491.589	539.318	452.766	427.228	-0.128659
ENSMUSG00000040374	Pex2	0.0771263	0.362804	0.283341	0.158452	-1.34627	-1.06059	0.285832	0.230585	0.285832	0.230585	0.182123	77.9985	translation_only	210.716	190.163	271.208	245.371	482.716	524.742	507.272	548.345	0.182123
ENSMUSG00000007777	0610009B22Rik	-0.122501	-0.345257	-0.225613	0.231693	-0.134557	-0.357313	-0.223285	0.21176	-0.225613	0.231693	-0.143284	-109.535	translation_only	468.259	480.084	389.861	354.424	429.154	595.006	417.32	516.821	-0.143284
ENSMUSG00000015533	Itga2	-0.0232147	-0.431463	-0.415052	0.231997	2.67322	2.26497	-0.409203	0.103476	-0.415052	0.231997	-0.263358	-93.0798	translation_only	283.084	233.807	227.137	161.102	38.775	41.486	35.7799	42.7228	-0.263358
ENSMUSG00000028069	Gpatch4	0.0764025	0.445831	0.364909	0.21458	0.041503	0.410931	0.369982	0.232557	0.369982	0.232557	0.234373	80.2756	translation_only	127.707	105.992	183.065	138.795	115.997	109.134	108.677	127.339	0.234373
ENSMUSG00000028197	Col24a1	0.17593	0.72048	0.535242	0.224119	-0.0510845	0.493465	0.547115	0.232614	0.547115	0.232614	0.346524	76.2778	translation_only	74.4957	34.2917	122.044	64.4408	64.7346	49.3347	84.2666	43.5523	0.346524
ENSMUSG00000028955	Vamp3	0.136853	0.476311	0.337927	0.119975	-2.86446	-2.52501	0.340377	0.232935	0.340377	0.232935	0.215378	73.9697	translation_only	144.734	121.58	196.626	175.973	981.863	940.723	1062.03	1037.79	0.215378
ENSMUSG00000045498	Pcdhb3	0.00329868	0.469787	0.458237	0.233263	0.423892	0.89038	0.467691	0.214989	0.458237	0.233263	0.289676	89.5977	translation_only	70.2388	81.0531	108.483	99.1396	54.5479	55.6884	59.856	49.7741	0.289676
ENSMUSG00000068373	D430041D05Rik	-0.211443	-0.440098	-0.231316	0.234798	0.612042	0.383388	-0.229216	0.229299	-0.231316	0.234798	-0.145568	-115.662	translation_only	483.158	411.5	298.329	356.903	278.655	300.493	253.134	243.478	-0.145568
ENSMUSG00000040648	Ppip5k2	-0.132033	-0.290663	-0.159843	0.235766	0.453715	0.295084	-0.158907	0.182209	-0.159843	0.235766	-0.100304	-114.43	translation_only	1332.41	1156.56	1027.2	1006.27	840.564	955.673	873.764	753.248	-0.100304
ENSMUSG00000024769	Cdc42bpg	0.130563	0.592296	0.454944	0.219075	0.0839824	0.545715	0.463548	0.236169	0.463548	0.236169	0.290541	77.5688	translation_only	76.6241	59.2311	118.653	89.2257	67.692	59.7996	68.2158	70.5133	0.290541
ENSMUSG00000024346	Pfdn1	-0.117507	-0.290196	-0.174007	0.236281	1.13643	0.963744	-0.173028	0.181443	-0.174007	0.236281	-0.109028	-112.044	translation_only	1057.84	978.872	762.772	889.778	451.828	461.952	425.011	411.466	-0.109028
ENSMUSG00000090035	Galnt4	0.23652	0.777327	0.535059	0.141264	-1.31224	-0.77143	0.544325	0.23661	0.544325	0.23661	0.34073	73.0764	translation_only	42.569	46.7614	74.5822	76.8332	114.354	102.781	126.066	128.168	0.34073
ENSMUSG00000017390	Aldoc	-0.117743	-0.24033	-0.123115	0.237096	0.959832	0.837245	-0.12266	0.126495	-0.123115	0.237096	-0.0769558	-116.101	translation_only	3748.2	4009.01	3095.16	3412.88	1965.37	1952.83	1674.63	1912.98	-0.0769558
ENSMUSG00000021047	Nova1	0.0700045	0.797669	0.721034	0.107463	-2.53918	-1.81152	0.734525	0.238246	0.734525	0.238246	0.45759	84.9845	translation_only	19.156	31.1743	37.2911	47.0913	143.928	137.165	156.495	136.464	0.45759
ENSMUSG00000054435	Gimap4	-0.0456652	-0.530821	-0.498243	0.238921	1.11194	0.62678	-0.488792	0.229604	-0.498243	0.238921	-0.309781	-94.9169	translation_only	91.5233	90.4053	57.6317	66.9193	41.7325	41.1122	35.4455	44.3819	-0.309781
ENSMUSG00000004610	Etfb	-0.109036	-0.315272	-0.208345	0.219453	-0.786384	-0.992619	-0.206699	0.238935	-0.206699	0.238935	-0.128509	-109.078	translation_only	485.286	576.724	383.081	456.042	1012.09	778.516	827.618	822.517	-0.128509
ENSMUSG00000028214	Gem	-0.177934	-0.772907	-0.60786	0.181831	-0.379453	-0.974428	-0.602858	0.239388	-0.602858	0.239388	-0.374313	-102.964	translation_only	61.725	62.3485	40.6812	32.2204	82.8077	75.8708	80.2539	58.8994	-0.374313
ENSMUSG00000039628	Hs3st6	-0.0933333	-0.873549	-0.791426	0.158016	-1.46587	-2.24609	-0.794733	0.241621	-0.794733	0.241621	-0.490242	-96.0986	translation_only	44.6974	28.0568	20.3406	19.8279	92.9944	108.013	87.6105	99.5482	-0.490242
ENSMUSG00000048899	Rimkla	-0.234791	-0.392225	-0.158322	0.242589	1.24196	1.08453	-0.157508	0.0970658	-0.158322	0.242589	-0.0973882	-120.905	translation_only	2205.07	2213.37	1583.18	1754.77	802.446	1036.4	692.859	859.018	-0.0973882
ENSMUSG00000021456	Fbp2	-0.00128943	-0.676267	-0.70217	0.242851	1.86888	1.1939	-0.681105	0.199149	-0.70217	0.242851	-0.431596	-90.1092	translation_only	46.8259	71.7008	44.0713	29.7419	12.8155	18.6874	15.0476	16.1766	-0.431596
ENSMUSG00000036040	Adamtsl2	-0.111552	-0.708229	-0.618816	0.242958	1.21513	0.61845	-0.602903	0.228788	-0.618816	0.242958	-0.380243	-98.951	translation_only	57.4681	71.7008	44.0713	34.6989	32.5316	21.6774	29.092	20.7392	-0.380243
ENSMUSG00000040867	Begain	-0.0581144	-0.559845	-0.512587	0.212867	0.426062	-0.0756673	-0.504976	0.244377	-0.504976	0.244377	-0.309015	-95.9263	translation_only	63.8534	124.697	71.1921	54.5268	81.4933	53.4459	65.8751	63.0472	-0.309015
ENSMUSG00000034343	Ube2f	-0.111577	-0.691338	-0.583249	0.143738	-3.24369	-3.82345	-0.587101	0.244651	-0.587101	0.244651	-0.358985	-99.1681	translation_only	70.2388	56.1137	47.4614	32.2204	555.009	632.381	505.6	586.09	-0.358985
ENSMUSG00000038295	Atg9b	0.107871	0.708978	0.590309	0.193278	-0.498355	0.102752	0.605426	0.245621	0.605426	0.245621	0.369149	81.3488	translation_only	29.7983	43.644	57.6317	59.4838	48.3045	51.9509	48.4867	58.8994	0.369149
ENSMUSG00000045690	Wdr89	-0.0108688	0.597478	0.60291	0.136843	-1.79239	-1.18404	0.611646	0.249055	0.611646	0.249055	0.369253	91.0422	translation_only	38.3121	34.2917	44.0713	64.4408	127.169	121.468	122.387	122.776	0.369253
ENSMUSG00000031853	Map3k21	-0.0733261	-0.579457	-0.515587	0.19253	-0.140203	-0.646335	-0.510824	0.249363	-0.510824	0.249363	-0.308113	-97.212	translation_only	97.9086	62.3485	50.8515	57.0053	89.3798	87.0832	85.2698	81.2977	-0.308113
ENSMUSG00000034282	Evpl	-0.217153	-1.00088	-0.828062	0.250096	2.04608	1.26235	-0.797461	0.199734	-0.828062	0.250096	-0.498405	-102.241	translation_only	42.569	52.9962	33.901	14.8709	12.4869	10.0912	9.36296	9.95482	-0.498405
ENSMUSG00000032263	Bckdhb	-0.239492	-0.469099	-0.231692	0.212644	-0.397695	-0.627302	-0.230577	0.25015	-0.230577	0.25015	-0.138761	-117.046	translation_only	406.534	386.561	254.257	312.29	492.574	537.449	431.699	434.694	-0.138761
ENSMUSG00000035212	Leprot	0.167682	0.432328	0.263204	0.151406	-2.50235	-2.2377	0.264838	0.252349	0.264838	0.252349	0.158373	68.8008	translation_only	217.102	221.337	250.867	332.118	1224.37	1217.67	1302.79	1422.3	0.158373
ENSMUSG00000055675	Kbtbd11	-0.136548	-0.293432	-0.15786	0.24705	-0.174174	-0.331058	-0.157026	0.252406	-0.157026	0.252406	-0.0938861	-114.955	translation_only	885.434	1019.4	698.361	832.773	1006.18	1099.94	945.324	957.322	-0.0938861
ENSMUSG00000026199	Ankzf1	0.154196	0.590567	0.430374	0.210382	-0.423678	0.0126937	0.438499	0.253768	0.438499	0.253768	0.261154	75.3669	translation_only	80.881	59.2311	94.9228	116.489	105.81	81.477	111.687	95.4004	0.261154
ENSMUSG00000026548	Slamf9	0.107506	0.713791	0.597376	0.179719	-0.890799	-0.284514	0.609833	0.253793	0.609833	0.253793	0.363168	81.4349	translation_only	40.4405	28.0568	67.802	47.0913	62.4344	64.6583	76.91	58.8994	0.363168
ENSMUSG00000015980	Lrrc27	-0.139344	-0.524244	-0.390775	0.203774	-0.272885	-0.657785	-0.387421	0.254707	-0.387421	0.254707	-0.230112	-104.885	translation_only	136.221	124.697	94.9228	86.7472	159.372	151.742	127.403	153.47	-0.230112
ENSMUSG00000064307	Lrrc51	0.0794281	-0.68114	-0.777985	0.176274	-0.724098	-1.48467	-0.771552	0.255702	-0.771552	0.255702	-0.456964	-83.3487	translation_only	34.0552	34.2917	16.9505	24.7849	53.8907	57.1834	62.5312	53.922	-0.456964
ENSMUSG00000047496	Rnf152	0.244647	1.00779	0.75702	0.116531	-2.66194	-1.8988	0.773935	0.257343	0.773935	0.257343	0.456225	76.355	translation_only	17.0276	21.822	50.8515	27.2634	128.483	110.256	143.788	137.294	0.456225
ENSMUSG00000005220	Corin	0.0758096	0.602799	0.516553	0.257804	0.62184	1.14883	0.528919	0.209513	0.516553	0.257804	0.3041	82.832	translation_only	53.2112	62.3485	94.9228	79.3117	40.7467	32.516	32.1016	44.7967	0.3041
ENSMUSG00000054871	Tmem158	0.0984862	0.218318	0.119251	0.25801	-1.78858	-1.66875	0.119782	0.233936	0.119251	0.25801	0.0701631	65.7192	translation_only	1609.11	1823.69	1881.51	2067.06	6013.09	5611.07	6322.34	6040.5	0.0701631
ENSMUSG00000052133	Sema5b	-0.18399	-0.639359	-0.465509	0.258027	2.73029	2.27492	-0.457234	0.111131	-0.465509	0.258027	-0.273876	-106.054	translation_only	212.845	180.811	111.873	138.795	23.6593	35.1323	26.4169	24.8871	-0.273876
ENSMUSG00000079109	Pms2	-0.0991697	-0.428205	-0.33497	0.241576	0.514847	0.185812	-0.330548	0.259166	-0.330548	0.259166	-0.193841	-103.039	translation_only	163.891	183.928	135.604	121.446	116.654	121.842	108.343	112.821	-0.193841
ENSMUSG00000075415	Fnbp1	-0.0972383	-0.200954	-0.104144	0.261424	-0.166517	-0.270233	-0.103767	0.169628	-0.104144	0.261424	-0.0606802	-115.822	translation_only	4075.98	3843.79	3430.78	3430.23	4386.84	4370.23	4154.81	3976.12	-0.0606802
ENSMUSG00000024592	C330018D20Rik	-0.154606	-0.788261	-0.643859	0.180158	-1.15605	-1.78971	-0.641929	0.261425	-0.641929	0.261425	-0.374022	-101.097	translation_only	46.8259	56.1137	20.3406	37.1774	102.195	122.215	87.9449	112.407	-0.374022
ENSMUSG00000026723	Trdmt1	-0.171268	-0.59474	-0.432496	0.235798	0.446398	0.0229261	-0.426381	0.261553	-0.426381	0.261553	-0.248342	-106.065	translation_only	100.037	121.58	84.7525	61.9623	72.2924	86.7094	67.2126	73.002	-0.248342
ENSMUSG00000051159	Cited1	-0.348585	-0.799254	-0.463211	0.25808	0.802007	0.351338	-0.455774	0.2617	-0.455774	0.2617	-0.26535	-113.564	translation_only	100.037	102.875	67.802	49.5698	53.8907	60.5471	48.4867	40.6489	-0.26535
ENSMUSG00000024772	Ehd1	0.22098	0.358558	0.136893	0.261845	0.238586	0.376165	0.137697	0.17262	0.136893	0.261845	0.0796654	58.3544	translation_only	1438.83	1614.83	1989.99	1893.57	1367.31	1168.71	1542.88	1393.68	0.0796654
ENSMUSG00000043410	Hfm1	-0.367248	-1.13019	-0.787417	0.216329	0.0638158	-0.699134	-0.781257	0.263376	-0.781257	0.263376	-0.452679	-108.001	translation_only	57.4681	21.822	16.9505	19.8279	37.4606	39.2435	32.436	26.5462	-0.452679
ENSMUSG00000044042	Fmn1	-0.213137	-0.345478	-0.133142	0.264158	0.326105	0.193764	-0.132432	0.146455	-0.133142	0.264158	-0.0769741	-121.672	translation_only	2371.09	2325.6	1769.63	1901	1605.55	2084.39	1584.68	1575.35	-0.0769741
ENSMUSG00000041986	Elmod1	0.206791	0.42695	0.218204	0.223761	-0.523687	-0.303528	0.220588	0.264162	0.220588	0.264162	0.127529	64.157	translation_only	327.781	268.099	410.202	394.08	409.767	440.275	481.523	492.764	0.127529
ENSMUSG00000025507	Pidd1	0.170787	0.744932	0.561352	0.264772	0.41898	0.993125	0.578316	0.235049	0.561352	0.264772	0.323972	77.0873	translation_only	42.569	37.4091	64.4119	69.3977	34.8318	24.2936	33.4391	32.768	0.323972
ENSMUSG00000020803	Txndc17	0.151809	0.322755	0.169663	0.265335	-0.825892	-0.654946	0.170924	0.258865	0.169663	0.265335	0.0977604	64.8098	translation_only	581.066	511.258	664.46	698.934	864.881	1050.6	976.757	1136.51	0.0977604
ENSMUSG00000031278	Acsl4	0.104707	0.218245	0.113143	0.266016	0.56389	0.677429	0.113619	0.156023	0.113143	0.266016	0.0650679	64.3699	translation_only	2749.95	2889.85	3288.4	3229.47	1856.27	1892.28	2051.16	1951.97	0.0650679
ENSMUSG00000000827	Tpd52l2	0.156326	0.288587	0.131435	0.266355	0.118007	0.250267	0.132197	0.216069	0.131435	0.266355	0.0755144	61.5557	translation_only	1213.22	1299.97	1559.45	1489.57	1100.82	1172.45	1254.64	1261.36	0.0755144
ENSMUSG00000095362	Gm14325	0.0933857	0.442458	0.345335	0.195864	-1.40321	-1.05414	0.349851	0.26684	0.349851	0.26684	0.200726	78.082	translation_only	110.679	112.227	169.505	133.839	252.366	327.777	270.857	343.856	0.200726
ENSMUSG00000062296	Trank1	0.121853	0.708344	0.573773	0.269006	0.477736	1.06423	0.589713	0.232799	0.573773	0.269006	0.327187	80.2392	translation_only	53.2112	28.0568	74.5822	61.9623	33.1888	25.7886	38.7894	24.8871	0.327187
ENSMUSG00000038005	Hpf1	-0.240284	-0.485434	-0.247742	0.226747	-0.983576	-1.22873	-0.246228	0.269853	-0.246228	0.269853	-0.140072	-116.335	translation_only	372.478	314.86	200.016	285.026	619.086	725.818	493.227	637.938	-0.140072
ENSMUSG00000038605	Samd10	0.129068	0.453616	0.322345	0.151496	-2.76653	-2.44198	0.325486	0.269884	0.325486	0.269884	0.185144	74.1173	translation_only	151.12	105.992	179.675	175.973	829.72	917.924	940.977	956.907	0.185144
ENSMUSG00000024887	Asah2	-0.22198	-0.447142	-0.227279	0.271259	2.08729	1.86213	-0.225741	0.136048	-0.227279	0.271259	-0.12878	-116.402	translation_only	821.581	685.834	539.026	565.096	152.471	198.834	134.091	165.084	-0.12878
ENSMUSG00000061119	Prcp	0.163475	0.31683	0.152322	0.271419	0.161149	0.314503	0.153294	0.241607	0.152322	0.271419	0.0862693	62.7075	translation_only	783.269	729.478	972.959	909.606	690.721	643.593	735.661	749.1	0.0862693
ENSMUSG00000066798	Zbtb6	0.100857	0.362502	0.259425	0.194828	-1.36895	-1.1073	0.262185	0.271928	0.262185	0.271928	0.148278	74.4521	translation_only	187.303	230.69	281.378	250.328	524.777	528.105	595.551	525.532	0.148278
ENSMUSG00000053560	Ier2	0.0561336	0.441496	0.380141	0.20776	-0.86287	-0.477508	0.38638	0.27245	0.38638	0.27245	0.218194	82.7541	translation_only	91.5233	84.1705	105.093	131.36	175.473	139.782	172.212	153.47	0.218194
ENSMUSG00000021036	Sptlc2	0.101207	0.233679	0.131718	0.273913	-0.0949839	0.037488	0.132462	0.217017	0.131718	0.273913	0.0740768	66.5824	translation_only	1243.01	1209.56	1457.74	1415.22	1250.99	1329.05	1449.25	1298.69	0.0740768
ENSMUSG00000032908	Sgpp2	-0.135291	-0.249853	-0.115178	0.273966	-0.351485	-0.466047	-0.114621	0.196583	-0.115178	0.273966	-0.0647652	-118.435	translation_only	2409.4	2565.64	2040.84	2109.2	2913.06	3322.99	2725.96	2912.62	-0.0647652
ENSMUSG00000047904	Sstr2	-0.308651	-0.721294	-0.423821	0.276223	1.53159	1.11894	-0.416032	0.224492	-0.423821	0.276223	-0.236806	-113.167	translation_only	144.734	140.284	67.802	101.618	40.418	56.8096	36.4487	41.4784	-0.236806
ENSMUSG00000022525	Hrasls	-0.100542	-0.541673	-0.451229	0.225184	-0.483075	-0.924206	-0.444844	0.276469	-0.444844	0.276469	-0.24838	-100.515	translation_only	93.6517	87.2879	67.802	57.0053	99.5664	150.247	98.6454	132.731	-0.24838
ENSMUSG00000022881	Rfc4	-0.0832448	-0.617798	-0.550381	0.27679	2.75202	2.21747	-0.537724	0.136155	-0.550381	0.27679	-0.30703	-97.6741	translation_only	123.45	115.345	81.3624	74.3547	14.4585	20.5561	15.382	17.4209	-0.30703
ENSMUSG00000043671	Dpy19l3	0.162812	0.479492	0.312832	0.227822	-0.404378	-0.0876984	0.317507	0.276867	0.317507	0.276867	0.177083	71.245	translation_only	144.734	112.227	193.236	168.537	177.445	160.711	188.262	187.897	0.177083
ENSMUSG00000024049	Myom1	-0.155378	-0.70044	-0.561685	0.249993	0.675887	0.130825	-0.55152	0.27811	-0.55152	0.27811	-0.306526	-102.507	translation_only	61.725	74.8182	61.0218	24.7849	42.0611	41.486	36.783	37.7454	-0.306526
ENSMUSG00000028124	Gclm	-0.244705	-0.367058	-0.123063	0.279909	-0.303934	-0.426287	-0.122472	0.186146	-0.123063	0.279909	-0.0680516	-123.69	translation_only	2315.75	2462.77	1759.46	1910.92	2638.35	3158.17	2262.16	2596.13	-0.0680516
ENSMUSG00000062981	Mrpl42	-0.143962	-0.570551	-0.434832	0.213271	-1.09818	-1.52477	-0.42956	0.28044	-0.42956	0.28044	-0.237186	-104.161	translation_only	97.9086	93.5228	61.0218	66.9193	157.4	247.047	169.536	193.704	-0.237186
ENSMUSG00000047022	Mipol1	-0.192804	-0.470151	-0.280194	0.19912	-1.78422	-2.06157	-0.27837	0.280721	-0.27837	0.280721	-0.153584	-112.298	translation_only	240.515	211.985	162.725	163.58	726.21	814.77	650.391	688.542	-0.153584
ENSMUSG00000030157	Clec2d	0.0878987	0.416374	0.324307	0.280773	1.70795	2.03643	0.328768	0.143981	0.324307	0.280773	0.178902	78.0796	translation_only	212.845	233.807	281.378	307.333	69.9922	63.9108	65.2063	76.3203	0.178902
ENSMUSG00000020846	Rflnb	-0.220583	-0.600255	-0.382832	0.179923	-2.36498	-2.74465	-0.381954	0.280804	-0.381954	0.280804	-0.210685	-110.178	translation_only	114.936	149.636	67.802	101.618	650.961	677.978	569.803	562.862	-0.210685
ENSMUSG00000036473	Tbc1d24	0.119732	0.410384	0.288117	0.205489	-1.00408	-0.713429	0.291162	0.280952	0.291162	0.280952	0.160538	73.7351	translation_only	174.533	134.049	206.796	205.715	311.843	303.857	325.363	339.294	0.160538
ENSMUSG00000073802	Cdkn2b	0.148017	0.558171	0.403545	0.258538	0.0174036	0.427558	0.412206	0.281652	0.412206	0.281652	0.226832	75.1481	translation_only	72.3672	81.0531	81.3624	138.795	76.2357	72.1333	70.2222	93.3265	0.226832
ENSMUSG00000090000	Ier3ip1	-0.177833	-0.682521	-0.506476	0.168434	-5.51946	-6.02415	-0.509786	0.283004	-0.509786	0.283004	-0.279469	-104.604	translation_only	68.1103	71.7008	47.4614	39.6559	3203.87	3093.14	2750.7	2779.05	-0.279469
ENSMUSG00000020357	Flt4	-0.0300243	-0.601683	-0.595437	0.284884	1.51067	0.939013	-0.57763	0.25958	-0.595437	0.284884	-0.324711	-92.8567	translation_only	51.0828	68.5834	40.6812	37.1774	23.9879	16.8186	21.0667	18.6653	-0.324711
ENSMUSG00000034303	Ccdc15	-0.0378975	-0.609093	-0.592449	0.274659	1.02553	0.454339	-0.578215	0.285351	-0.578215	0.285351	-0.314908	-93.5603	translation_only	46.8259	62.3485	27.1208	42.1343	28.2598	23.9198	24.4106	26.1314	-0.314908
ENSMUSG00000089857	Zfp882	-0.589334	0.602095	1.17265	0.286956	2.83295	4.02438	1.19359	0.0143712	1.17265	0.286956	0.635795	134.386	translation_only	42.569	49.8788	91.5327	49.5698	5.58623	7.1012	3.00952	5.3922	0.635795
ENSMUSG00000046808	Atp10d	-0.039991	-0.686162	-0.654989	0.194305	-1.44936	-2.09554	-0.656248	0.288353	-0.656248	0.288353	-0.354423	-93.3355	translation_only	36.1836	49.8788	33.901	19.8279	109.424	119.225	109.68	111.162	-0.354423
ENSMUSG00000048264	Dip2c	-0.166386	-0.282169	-0.116247	0.288463	0.697667	0.581884	-0.115957	0.172985	-0.116247	0.288463	-0.062763	-120.526	translation_only	2994.73	2952.2	2545.96	2329.78	1665.03	1944.98	1662.26	1531.38	-0.062763
ENSMUSG00000004791	Pgf	-0.092699	-0.561905	-0.477318	0.219069	-0.458905	-0.928111	-0.473629	0.289184	-0.473629	0.289184	-0.255204	-99.3679	translation_only	76.6241	93.5228	33.901	76.8332	124.869	103.528	98.9798	114.066	-0.255204
ENSMUSG00000055301	Adh7	-0.0220342	0.637126	0.644307	0.244277	-0.502767	0.156392	0.664507	0.290004	0.664507	0.290004	0.357237	91.9807	translation_only	25.5414	24.9394	44.0713	34.6989	33.846	36.6273	30.4296	38.5749	0.357237
ENSMUSG00000021070	Bdkrb2	0.163185	0.573396	0.403344	0.290022	1.4126	1.82282	0.411308	0.176006	0.403344	0.290022	0.216825	74.114	translation_only	127.707	102.875	193.236	153.666	36.8034	49.3347	50.8275	44.7967	0.216825
ENSMUSG00000041679	Lrrc29	0.0591272	0.728677	0.651065	0.289762	0.0867631	0.756313	0.677071	0.29022	0.677071	0.29022	0.363772	85.361	translation_only	25.5414	21.822	30.5109	47.0913	23.9879	20.1824	23.7418	21.9836	0.363772
ENSMUSG00000024038	Ndufv3	-0.124221	-0.254982	-0.131505	0.291005	2.15408	2.02332	-0.130842	0.127073	-0.131505	0.291005	-0.0704999	-115.974	translation_only	2626.5	2662.28	2152.71	2247.99	561.581	607.34	504.596	560.788	-0.0704999
ENSMUSG00000041440	Gk5	0.189832	0.891101	0.693445	0.162914	-2.0743	-1.37303	0.711111	0.294486	0.711111	0.294486	0.377554	77.974	translation_only	23.4129	15.5871	30.5109	42.1343	88.0653	76.6183	92.9608	93.7412	0.377554
ENSMUSG00000038888	Ctu1	0.107511	0.40749	0.296759	0.268376	0.224968	0.524948	0.300859	0.294649	0.300859	0.294649	0.159664	75.2201	translation_only	146.863	174.576	152.554	262.72	129.141	139.782	145.795	141.856	0.159664
ENSMUSG00000098387	Pet117	0.0366985	0.795203	0.736908	0.295072	0.708189	1.46669	0.764487	0.221655	0.736908	0.295072	0.390615	87.3577	translation_only	25.5414	21.822	37.2911	44.6128	13.8013	14.9499	16.3852	12.8583	0.390615
ENSMUSG00000054263	Lifr	0.0659496	0.15889	0.0928734	0.295869	0.37088	0.463821	0.0929718	0.0993141	0.0928734	0.295869	0.0491207	67.4585	translation_only	14624.6	14118.8	16252.1	15678.9	10414.7	11466.6	11819.7	10926.7	0.0491207
ENSMUSG00000021646	Mccc2	-0.150731	-0.368417	-0.22073	0.297159	0.579453	0.361767	-0.218263	0.295848	-0.22073	0.297159	-0.116327	-112.251	translation_only	380.992	321.095	254.257	287.505	224.107	241.067	197.291	219.006	-0.116327
ENSMUSG00000050555	Hyls1	-0.12337	-0.470903	-0.353903	0.27868	0.747928	0.400395	-0.349564	0.297491	-0.349564	0.297491	-0.184055	-104.681	translation_only	114.936	196.398	122.044	99.1396	84.4507	94.9319	82.5946	80.8829	-0.184055
ENSMUSG00000045176	Borcs6	0.145676	0.322288	0.175272	0.264231	-2.02635	-1.84973	0.176763	0.297699	0.176763	0.297699	0.0930167	65.6768	translation_only	410.79	539.315	576.317	592.359	2116.85	1651.22	2161.51	1980.59	0.0930167
ENSMUSG00000047414	Flrt2	0.165074	0.371041	0.20401	0.2871	-0.065296	0.140672	0.20622	0.298915	0.20622	0.298915	0.108152	66.0161	translation_only	319.267	277.451	362.741	406.473	300.999	316.938	323.356	365.01	0.108152
ENSMUSG00000017167	Cntnap1	-0.222372	-0.33495	-0.112728	0.300909	2.02321	1.91063	-0.112547	0.0727294	-0.112728	0.300909	-0.058795	-123.58	translation_only	7724.14	7812.27	6132.69	6114.44	2100.75	1657.2	1681.65	1518.94	-0.058795
ENSMUSG00000036478	Btg1	0.15079	0.387518	0.234735	0.228168	-1.79237	-1.55564	0.237254	0.301193	0.237254	0.301193	0.123646	68.7381	translation_only	210.716	221.337	294.939	267.677	814.276	654.058	823.606	796.386	0.123646
ENSMUSG00000048424	Ranbp3l	-0.0756287	-0.743838	-0.688402	0.233232	-0.49264	-1.16085	-0.680855	0.304435	-0.680855	0.304435	-0.351665	-95.8055	translation_only	36.1836	37.4091	27.1208	17.3494	47.9759	53.8197	55.509	40.2341	-0.351665
ENSMUSG00000032058	Ppp2r1b	0.180952	0.56721	0.38224	0.216859	-1.02035	-0.63409	0.387691	0.30648	0.387691	0.30648	0.199117	72.3062	translation_only	83.0095	68.5834	138.994	89.2257	158.058	146.883	166.861	176.698	0.199117
ENSMUSG00000052557	Gan	0.18612	0.318053	0.131146	0.306883	0.128396	0.260329	0.131927	0.265484	0.131146	0.306883	0.0672815	59.6644	translation_only	932.26	1028.75	1240.78	1184.72	861.923	896.994	1035.94	951.1	0.0672815
ENSMUSG00000090799	Klhl33	-0.154688	-0.65172	-0.516214	0.307411	1.13925	0.642218	-0.503123	0.30506	-0.516214	0.307411	-0.264447	-103.352	translation_only	57.4681	74.8182	40.6812	42.1343	28.2598	30.2736	26.0825	26.1314	-0.264447
ENSMUSG00000033938	Ndufb7	-0.146523	-0.277284	-0.131505	0.30744	1.5112	1.38044	-0.130842	0.18129	-0.131505	0.30744	-0.067362	-117.853	translation_only	1828.34	1854.87	1495.03	1524.27	666.734	603.602	601.904	537.975	-0.067362
ENSMUSG00000001666	Ddt	0.138087	0.420332	0.279811	0.203987	-1.90935	-1.6271	0.282654	0.308162	0.282654	0.308162	0.144499	71.8137	translation_only	148.991	140.284	172.895	210.672	512.291	559.874	576.491	595.215	0.144499
ENSMUSG00000033177	Tmprss7	-0.204005	-0.762122	-0.573242	0.248118	-0.2218	-0.779919	-0.566481	0.309216	-0.566481	0.309216	-0.288757	-104.986	translation_only	61.725	46.7614	20.3406	42.1343	55.8623	69.8908	56.8465	51.4332	-0.288757
ENSMUSG00000070366	Plpp4	-0.164678	-0.597442	-0.439062	0.231425	-0.909757	-1.34252	-0.436775	0.311025	-0.436775	0.311025	-0.221535	-105.41	translation_only	108.551	65.4659	50.8515	64.4408	153.457	173.793	152.817	136.879	-0.221535
ENSMUSG00000051041	Olfml1	0.140498	0.49262	0.345743	0.315181	1.10927	1.4614	0.352635	0.235574	0.345743	0.315181	0.17337	74.0815	translation_only	121.322	118.462	172.895	163.58	51.5905	57.9309	60.5248	59.3141	0.17337
ENSMUSG00000066152	Slc31a2	0.183081	0.446808	0.261124	0.241176	-0.972155	-0.708428	0.264405	0.315263	0.264405	0.315263	0.132553	67.7184	translation_only	163.891	149.636	213.576	213.15	302.971	304.604	336.398	348.834	0.132553
ENSMUSG00000006522	Itih3	0.0423043	-0.712916	-0.797941	0.315794	2.8269	2.07168	-0.765975	0.214582	-0.797941	0.315794	-0.399446	-86.6041	translation_only	55.3396	31.1743	20.3406	32.2204	6.24344	5.97996	6.68783	5.80698	-0.399446
ENSMUSG00000022758	P2rx6	-0.162786	-0.353951	-0.193767	0.316009	0.656948	0.465783	-0.191555	0.301977	-0.193767	0.316009	-0.0969416	-114.698	translation_only	423.561	508.14	335.62	381.688	285.884	291.897	235.077	277.905	-0.0969416
ENSMUSG00000057606	Colq	-0.0790176	-0.619349	-0.54909	0.229955	-1.05617	-1.5965	-0.547212	0.316225	-0.547212	0.316225	-0.273608	-97.2706	translation_only	63.8534	40.5265	33.901	34.6989	113.368	103.528	96.3047	107.844	-0.273608
ENSMUSG00000022353	Mtss1	0.190262	0.31709	0.125992	0.317683	-0.211218	-0.0843898	0.126859	0.267154	0.125992	0.317683	0.0627449	59.0352	translation_only	1177.03	1041.22	1434.01	1330.95	1231.93	1305.5	1552.58	1321.92	0.0627449
ENSMUSG00000003680	Taf6l	0.142053	0.325022	0.180845	0.317774	0.138627	0.321597	0.183232	0.313761	0.180845	0.317774	0.0900393	66.392	translation_only	359.708	352.269	444.103	443.65	327.616	309.089	352.448	345.515	0.0900393
ENSMUSG00000023191	P3h3	0.200951	0.552411	0.347187	0.318244	2.17332	2.52478	0.351998	0.131295	0.347187	0.318244	0.172635	70.0101	translation_only	200.074	202.633	325.45	265.199	46.9901	40.7385	48.8211	51.4332	0.172635
ENSMUSG00000011884	Gltp	0.12361	0.383885	0.2587	0.209422	-2.23292	-1.97264	0.260618	0.318361	0.260618	0.318361	0.129548	72.1516	translation_only	185.175	171.458	186.455	272.634	863.566	790.476	866.073	924.554	0.129548
ENSMUSG00000019832	Rab32	0.126147	0.571028	0.438177	0.228014	-1.26771	-0.822832	0.447208	0.318388	0.447208	0.318388	0.222282	77.5428	translation_only	48.9543	56.1137	91.5327	64.4408	138.341	108.761	122.722	145.589	0.222282
ENSMUSG00000050840	Cdh20	-0.28801	-0.595659	-0.315156	0.319302	1.46664	1.15899	-0.309144	0.260107	-0.315156	0.319302	-0.156254	-115.804	translation_only	210.716	202.633	138.994	133.839	63.4202	84.0932	58.5185	61.3881	-0.156254
ENSMUSG00000029467	Atp2a2	-0.0874585	-0.179641	-0.09222	0.323143	1.10241	1.01023	-0.0921418	0.115715	-0.09222	0.323143	-0.0452435	-115.959	translation_only	13017.6	12282.7	11065.3	11160.6	5257.63	6347.36	5377.35	5468.1	-0.0452435
ENSMUSG00000043673	Kcns3	-0.24194	-0.437476	-0.198555	0.323209	-0.401341	-0.596877	-0.19606	0.319466	-0.198555	0.323209	-0.0973944	-118.944	translation_only	385.249	402.148	281.378	294.94	431.454	590.895	372.846	485.712	-0.0973944
ENSMUSG00000030247	Kcnj8	-0.0894388	-0.711297	-0.656146	0.323235	1.63223	1.01037	-0.632462	0.293691	-0.656146	0.323235	-0.321828	-97.1668	translation_only	53.2112	37.4091	37.2911	19.8279	13.8013	15.3237	9.02856	18.2505	-0.321828
ENSMUSG00000073490	Ifi207	0.0912816	0.578395	0.475726	0.324131	0.818512	1.30563	0.489739	0.269199	0.475726	0.324131	0.232763	81.0316	translation_only	65.9819	40.5265	71.1921	89.2257	31.8744	28.7786	29.4264	34.8419	0.232763
ENSMUSG00000020407	Upp1	0.147387	0.723548	0.561306	0.324253	0.907339	1.4835	0.580069	0.241957	0.561306	0.324253	0.274544	78.4864	translation_only	40.4405	37.4091	61.0218	66.9193	23.0021	17.9399	21.0667	24.0575	0.274544
ENSMUSG00000023277	Twf2	0.152198	0.310646	0.157191	0.324738	0.566928	0.725376	0.158535	0.281431	0.157191	0.324738	0.0767826	63.8978	translation_only	553.396	611.015	708.531	721.241	398.594	371.505	420.999	429.302	0.0767826
ENSMUSG00000041540	Sox5	0.0864127	0.561332	0.469761	0.215015	-1.4229	-0.947982	0.477282	0.325035	0.477282	0.325035	0.232947	81.2485	translation_only	34.0552	59.2311	61.0218	71.8762	118.297	121.842	128.741	124.435	0.232947
ENSMUSG00000039841	Zfp800	-0.156922	-0.417463	-0.264876	0.32534	1.91277	1.65223	-0.26115	0.222449	-0.264876	0.32534	-0.12917	-110.601	translation_only	340.552	333.565	277.988	228.021	88.0653	88.2044	89.6169	67.195	-0.12917
ENSMUSG00000060594	Layn	-0.0955206	0.567885	0.645035	0.325851	1.08674	1.75015	0.666539	0.212558	0.645035	0.325851	0.31412	99.548	translation_only	31.9267	40.5265	50.8515	54.5268	13.8013	19.4349	16.7196	14.1027	0.31412
ENSMUSG00000021534	1700001L19Rik	-0.166221	-0.806239	-0.656626	0.255213	-0.54859	-1.18861	-0.65307	0.32768	-0.65307	0.32768	-0.316445	-101.649	translation_only	48.9543	28.0568	13.5604	29.7419	54.5479	58.3046	56.1777	43.5523	-0.316445
ENSMUSG00000041406	BC055324	0.014563	0.612523	0.583676	0.328595	1.34415	1.94211	0.600121	0.189398	0.583676	0.328595	0.282114	88.638	translation_only	44.6974	52.9962	81.3624	66.9193	14.4585	23.1724	17.3883	20.3244	0.282114
ENSMUSG00000029162	Khk	-0.161388	-0.364313	-0.204851	0.276263	-0.904429	-1.10736	-0.20347	0.328946	-0.20347	0.328946	-0.0982505	-113.893	translation_only	353.322	430.205	250.867	344.51	782.401	650.695	618.289	655.359	-0.0982505
ENSMUSG00000000884	Gnb1l	-0.172103	-0.664722	-0.499616	0.234617	-1.62423	-2.11685	-0.499599	0.330844	-0.499599	0.330844	-0.239995	-104.516	translation_only	55.3396	65.4659	44.0713	32.2204	190.589	173.419	166.192	154.715	-0.239995
ENSMUSG00000019487	Trip10	-0.182082	-0.345281	-0.165296	0.331303	0.595945	0.432746	-0.163716	0.306483	-0.165296	0.331303	-0.0793046	-117.805	translation_only	640.663	573.606	481.394	473.392	406.481	386.829	371.174	323.117	-0.0793046
ENSMUSG00000040136	Abcc8	-0.00939042	-0.327548	-0.321822	0.332299	3.76086	3.4427	-0.318777	0.0661779	-0.321822	0.332299	-0.153983	-91.6422	translation_only	487.415	517.493	406.812	389.123	29.9028	42.981	34.1079	37.7454	-0.153983
ENSMUSG00000004233	Wars2	-0.136918	-0.494626	-0.364987	0.290871	0.171813	-0.185895	-0.360362	0.334231	-0.360362	0.334231	-0.171515	-105.473	translation_only	125.578	99.7576	61.0218	96.6611	95.2946	103.154	83.9322	95.4004	-0.171515
ENSMUSG00000023947	Nfkbie	0.071943	0.503352	0.423249	0.334231	1.35181	1.78322	0.432477	0.214606	0.423249	0.334231	0.201447	81.8659	translation_only	95.7802	77.9356	128.824	118.968	36.1462	31.3948	30.4296	40.2341	0.201447
ENSMUSG00000057522	Spop	0.18934	0.358069	0.167348	0.279352	-3.13003	-2.9613	0.168856	0.334429	0.168856	0.334429	0.0803241	62.131	translation_only	370.35	405.265	491.564	493.22	2928.17	3730	3696.36	3841.32	0.0803241
ENSMUSG00000014668	Chfr	0.147087	0.364373	0.215263	0.255773	-1.77848	-1.5612	0.217772	0.335232	0.217772	0.335232	0.103366	68.0175	translation_only	221.359	230.69	267.818	307.333	794.231	728.434	900.181	774.402	0.103366
ENSMUSG00000040717	Il17rd	-0.184271	-0.468138	-0.289198	0.30384	0.051722	-0.232145	-0.285508	0.336359	-0.285508	0.336359	-0.135102	-111.486	translation_only	197.946	149.636	128.824	123.925	179.417	153.61	161.177	129.827	-0.135102
ENSMUSG00000036381	P2ry14	0.311733	0.699444	0.379021	0.339359	0.389178	0.776889	0.38959	0.315736	0.379021	0.339359	0.17789	65.9781	translation_only	70.2388	59.2311	115.263	96.6611	41.7325	56.4359	52.165	68.8542	0.17789
ENSMUSG00000019132	BC005537	0.193182	0.55671	0.362163	0.184108	-6.3468	-5.98327	0.364745	0.339493	0.364745	0.339493	0.171127	70.8629	translation_only	74.4957	65.4659	101.703	104.097	5227.4	6049.85	6458.77	6344.13	0.171127
ENSMUSG00000070604	Vsig10l	0.13435	0.760673	0.612867	0.262513	-0.920606	-0.294284	0.634283	0.339987	0.634283	0.339987	0.297185	79.9837	translation_only	14.8991	31.1743	40.6812	34.6989	38.1178	44.8497	52.4994	37.7454	0.297185
ENSMUSG00000034042	Gpbp1l1	-0.201333	-0.644716	-0.448279	0.23497	-2.30224	-2.74562	-0.448885	0.340962	-0.448885	0.340962	-0.209762	-107.343	translation_only	55.3396	99.7576	44.0713	52.0483	384.136	353.565	339.742	297.4	-0.209762
ENSMUSG00000031543	Ank1	-0.207705	-0.313862	-0.106376	0.341273	1.02462	0.918462	-0.106134	0.121359	-0.106376	0.341273	-0.0496668	-123.495	translation_only	6649.27	6166.27	5108.88	5155.26	3490.74	2712.29	2897.5	2439.35	-0.0496668
ENSMUSG00000024300	Myo1f	0.209547	0.599589	0.381353	0.343251	0.570251	0.960294	0.391106	0.283868	0.381353	0.343251	0.177095	70.7363	translation_only	93.6517	62.3485	128.824	111.532	68.3492	36.6273	57.8497	63.0472	0.177095
ENSMUSG00000004677	Myo9b	0.114534	0.311555	0.195428	0.344918	1.35564	1.55266	0.197047	0.190084	0.195428	0.344918	0.0903432	69.8155	translation_only	651.305	526.845	728.871	736.112	266.496	189.49	276.876	213.614	0.0903432
ENSMUSG00000025010	Ccnj	0.0915676	0.634975	0.536301	0.225912	-1.81438	-1.27097	0.548644	0.347084	0.548644	0.347084	0.252138	81.7941	translation_only	23.4129	37.4091	47.4614	44.6128	97.5948	108.387	117.371	100.378	0.252138
ENSMUSG00000063317	Usp31	-0.163666	-0.271298	-0.108587	0.347534	-1.32759	-1.43522	-0.107839	0.341665	-0.108587	0.347534	-0.0498417	-121.101	translation_only	1430.32	1275.03	1122.12	1115.32	3421.73	3281.5	3122.55	2821.36	-0.0498417
ENSMUSG00000030278	Cidec	0.208238	0.575268	0.359463	0.349346	0.677918	1.04495	0.368252	0.304444	0.359463	0.349346	0.164183	70.1006	translation_only	72.3672	90.4053	125.434	114.011	42.3897	56.8096	60.5248	53.0924	0.164183
ENSMUSG00000028528	Dnajc6	-0.211257	-0.302819	-0.0919478	0.350024	1.09114	0.99958	-0.0916918	0.189765	-0.0919478	0.350024	-0.0419193	-124.901	translation_only	5651.03	5449.26	4339.33	4605.04	2479.63	2650.99	2337.06	2063.55	-0.0419193
ENSMUSG00000018427	Ypel2	-0.205512	-0.611004	-0.409428	0.246161	-2.41873	-2.82422	-0.409715	0.354028	-0.409715	0.354028	-0.184766	-108.59	translation_only	65.9819	105.992	64.4119	47.0913	450.842	439.153	396.922	369.573	-0.184766
ENSMUSG00000032359	Ctsh	0.201483	0.39996	0.19596	0.357939	1.08474	1.28322	0.198608	0.275462	0.19596	0.357939	0.0874355	63.2629	translation_only	359.708	342.917	488.174	438.693	163.972	162.58	169.202	204.074	0.0874355
ENSMUSG00000029228	Lnx1	-0.220475	-0.497484	-0.283601	0.342442	0.482579	0.20557	-0.278737	0.3599	-0.278737	0.3599	-0.123709	-113.902	translation_only	172.404	152.754	122.044	109.054	110.082	119.973	93.2952	102.866	-0.123709
ENSMUSG00000034308	Sdr42e1	0.248188	0.629234	0.37233	0.349116	0.148755	0.5298	0.383844	0.360586	0.383844	0.360586	0.170039	68.4743	translation_only	48.9543	68.5834	91.5327	86.7472	52.5763	50.0822	56.5121	64.7063	0.170039
ENSMUSG00000058488	Kl	-0.218956	-0.776482	-0.555496	0.335325	3.59366	3.03614	-0.558535	0.363061	-0.558535	0.363061	-0.245766	-105.748	translation_only	317.139	614.133	342.4	198.279	35.8176	39.991	31.0984	33.5975	-0.245766
ENSMUSG00000025578	Cbx8	-0.184156	-0.44801	-0.26909	0.322542	0.0568736	-0.206981	-0.265658	0.363227	-0.265658	0.363227	-0.116842	-112.345	translation_only	168.147	190.163	145.774	116.489	163.644	173.793	146.463	148.493	-0.116842
ENSMUSG00000051671	Coa6	-0.209953	-0.522654	-0.320889	0.331219	-0.0655282	-0.378229	-0.315001	0.365483	-0.315001	0.365483	-0.137697	-111.886	translation_only	134.092	118.462	74.5822	99.1396	118.954	142.398	90.2856	134.39	-0.137697
ENSMUSG00000027784	Ppm1l	-0.12772	-0.236634	-0.109677	0.36699	0.124446	0.0155329	-0.109042	0.267234	-0.109677	0.36699	-0.0477474	-118.357	translation_only	1830.47	1998.27	1606.91	1615.98	1511.9	1936.76	1517.47	1616.41	-0.0477474
ENSMUSG00000021255	Esrrb	-0.287066	-0.619885	-0.342925	0.36752	0.907982	0.575163	-0.336015	0.364799	-0.342925	0.36752	-0.149076	-114.849	translation_only	134.092	99.7576	64.4119	86.7472	55.2051	68.7696	55.509	45.2115	-0.149076
ENSMUSG00000019808	Adat2	0.110414	0.527599	0.405651	0.370713	0.3606	0.777785	0.419442	0.356724	0.405651	0.370713	0.17482	78.1799	translation_only	53.2112	46.7614	77.9723	66.9193	37.4606	39.6172	39.1238	43.5523	0.17482
ENSMUSG00000058498	Rnf207	-0.117907	-0.685676	-0.594925	0.34488	0.866282	0.298512	-0.580055	0.372165	-0.580055	0.372165	-0.248997	-99.757	translation_only	44.6974	43.644	47.4614	9.91396	25.631	22.0511	25.7481	17.8357	-0.248997
ENSMUSG00000038564	Ift172	-0.114192	-0.236053	-0.122573	0.373269	2.13647	2.01461	-0.122019	0.216403	-0.122573	0.373269	-0.0524585	-115.816	translation_only	1777.25	1767.58	1488.25	1504.44	410.424	382.718	361.811	366.254	-0.0524585
ENSMUSG00000006215	Zbtb17	0.0973689	0.379305	0.277346	0.373302	1.0245	1.30644	0.282361	0.269201	0.277346	0.373302	0.118687	75.6029	translation_only	163.891	196.398	206.796	252.806	106.467	66.1533	100.652	82.9569	0.118687
ENSMUSG00000024948	Map4k2	-0.247776	-0.415149	-0.169629	0.356161	-0.531093	-0.698466	-0.167962	0.375546	-0.167962	0.375546	-0.0714404	-120.83	translation_only	512.956	405.265	362.741	329.639	715.038	599.865	607.923	491.934	-0.0714404
ENSMUSG00000070780	Rbm47	0.147537	0.716024	0.557828	0.260945	-1.63309	-1.06461	0.575975	0.375811	0.575975	0.375811	0.244807	78.3572	translation_only	17.0276	31.1743	33.901	42.1343	81.1647	61.6684	82.5946	74.6612	0.244807
ENSMUSG00000023921	Mut	-0.13426	-0.253749	-0.12051	0.376925	0.741506	0.622017	-0.119688	0.279288	-0.12051	0.376925	-0.0510653	-117.884	translation_only	1332.41	1377.9	1139.07	1120.28	739.355	854.387	645.71	796.801	-0.0510653
ENSMUSG00000040795	Iqcc	0.216969	0.458611	0.23783	0.378409	0.804162	1.0458	0.242452	0.335711	0.23783	0.378409	0.100374	64.6812	translation_only	161.762	218.22	227.137	282.548	109.753	101.659	108.343	136.049	0.100374
ENSMUSG00000034973	Dopey1	-0.129408	-0.27502	-0.146838	0.37866	2.60621	2.4606	-0.145878	0.184937	-0.146838	0.37866	-0.0619291	-115.199	translation_only	1668.7	1465.19	1349.26	1241.72	226.407	282.179	215.348	246.382	-0.0619291
ENSMUSG00000031311	Nono	0.114335	0.246251	0.130624	0.380313	0.271432	0.403348	0.131867	0.337589	0.130624	0.380313	0.0548438	65.0945	translation_only	740.7	695.186	908.547	795.596	549.423	624.158	664.101	596.875	0.0548438
ENSMUSG00000029636	Wasf3	-0.185337	-0.341394	-0.157862	0.322888	-1.42551	-1.58156	-0.156699	0.38275	-0.156699	0.38275	-0.0653568	-118.497	translation_only	502.314	442.674	376.301	369.295	1225.03	1283.82	1122.55	1068.48	-0.0653568
ENSMUSG00000045318	Adra2c	-0.193714	-0.50388	-0.314332	0.28728	-1.95529	-2.26546	-0.312778	0.382948	-0.312778	0.382948	-0.130385	-111.029	translation_only	106.422	134.049	91.5327	76.8332	502.104	407.011	402.941	386.994	-0.130385
ENSMUSG00000029101	Rgs12	0.14257	0.317622	0.172832	0.383293	0.351503	0.526554	0.17502	0.364258	0.172832	0.383293	0.0719791	65.8262	translation_only	344.809	342.917	484.784	374.252	287.527	242.562	304.296	277.076	0.0719791
ENSMUSG00000027366	Sppl2a	0.124917	0.250215	0.124087	0.381219	-0.450339	-0.325041	0.125337	0.384672	0.125337	0.384672	0.0520035	63.4699	translation_only	617.25	604.781	742.432	706.37	789.302	855.135	904.528	876.024	0.0520035
ENSMUSG00000006784	Ttc25	-0.192243	-0.680654	-0.516389	0.384991	1.99519	1.50678	-0.495553	0.323514	-0.516389	0.384991	-0.214069	-105.772	translation_only	65.9819	59.2311	44.0713	34.6989	16.4301	14.5762	15.7164	11.1992	-0.214069
ENSMUSG00000070336	Fbxo47	0.251564	0.892889	0.618216	0.385964	0.579228	1.22055	0.648619	0.341181	0.618216	0.385964	0.255603	74.2653	translation_only	27.6698	12.4697	50.8515	27.2634	12.8155	14.5762	15.382	17.0062	0.255603
ENSMUSG00000028803	Nipal3	-0.157193	-0.243438	-0.08653	0.387761	-0.243105	-0.329351	-0.0863444	0.256959	-0.08653	0.387761	-0.0356016	-122.851	translation_only	4220.71	4432.98	3474.85	3774.74	4984.24	5082.59	4080.24	4887.4	-0.0356016
ENSMUSG00000027508	Pag1	0.227153	0.432453	0.203235	0.314749	-1.11809	-0.912793	0.205963	0.388729	0.205963	0.388729	0.0845174	62.2885	translation_only	191.56	199.515	277.988	247.849	414.696	418.971	503.593	465.388	0.0845174
ENSMUSG00000038069	Cdkn2aip	-0.260282	-0.472594	-0.216758	0.38572	0.468241	0.255929	-0.213333	0.389825	-0.213333	0.389825	-0.087281	-118.844	translation_only	255.414	233.807	172.895	178.451	168.244	180.894	160.173	128.998	-0.087281
ENSMUSG00000019942	Cdk1	0.0944073	0.495748	0.390681	0.389985	0.705963	1.1073	0.402572	0.326918	0.390681	0.389985	0.15977	79.218	translation_only	57.4681	68.5834	91.5327	84.2687	29.5742	45.971	43.8053	36.0862	0.15977
ENSMUSG00000041141	Pnmal1	-0.231259	-0.426631	-0.199215	0.377516	0.346264	0.150892	-0.196405	0.390281	-0.196405	0.390281	-0.0802554	-118.46	translation_only	300.111	277.451	227.137	203.236	209.648	238.825	188.931	190.386	-0.0802554
ENSMUSG00000020064	Herc4	0.19067	0.333939	0.141884	0.391303	0.403296	0.546565	0.143441	0.358062	0.141884	0.391303	0.0578158	60.2747	translation_only	521.47	480.084	644.119	617.144	350.947	396.92	420.664	426.813	0.0578158
ENSMUSG00000041308	Sntb2	0.199053	0.369946	0.168938	0.34624	-0.722829	-0.551936	0.170968	0.391529	0.170968	0.391529	0.0696246	61.7171	translation_only	304.368	283.686	406.812	354.424	468.915	488.862	571.475	520.139	0.0696246
ENSMUSG00000072082	Ccnf	0.13594	0.596343	0.447343	0.39205	0.504427	0.96483	0.462634	0.366499	0.447343	0.39205	0.181916	77.1585	translation_only	51.0828	28.0568	71.1921	52.0483	24.9738	31.3948	30.764	30.694	0.181916
ENSMUSG00000031837	Necab2	-0.230912	-0.494349	-0.269743	0.368735	0.263202	-0.000235255	-0.265725	0.393217	-0.265725	0.393217	-0.107716	-115.037	translation_only	163.891	155.871	132.214	96.6611	146.885	115.488	104.999	117.384	-0.107716
ENSMUSG00000025964	Adam23	-0.181324	-0.256307	-0.0753095	0.393266	-0.0619692	-0.136952	-0.0750842	0.234947	-0.0753095	0.393266	-0.030524	-125.277	translation_only	7387.84	7291.66	6051.33	6168.96	7427.39	7653.6	6926.58	6282.32	-0.030524
ENSMUSG00000036181	Hist1h1c	0.135737	0.220023	0.0838417	0.394147	-0.158276	-0.0739899	0.0842227	0.263318	0.0838417	0.394147	0.0339007	58.3287	translation_only	3456.6	3482.16	3878.27	4146.52	3875.2	3741.21	4386.21	3925.1	0.0339007
ENSMUSG00000048865	Arhgap30	0.21319	0.60814	0.387467	0.32559	-0.728235	-0.333285	0.397918	0.39505	0.397918	0.39505	0.160499	70.6813	translation_only	44.6974	49.8788	84.7525	59.4838	84.4507	68.7696	86.6073	90.0082	0.160499
ENSMUSG00000028688	Toe1	0.114305	0.363462	0.245046	0.395938	1.34836	1.59751	0.249453	0.265376	0.245046	0.395938	0.0985998	72.5421	translation_only	225.615	240.042	322.059	275.112	70.978	108.761	92.6264	100.378	0.0985998
ENSMUSG00000073433	Arhgdig	0.14533	0.26297	0.116598	0.396068	-1.84315	-1.72551	0.117593	0.377297	0.116598	0.396068	0.0468995	61.0727	translation_only	738.571	791.826	850.915	964.133	3021.5	2364.33	2831.63	3088.07	0.0468995
ENSMUSG00000030672	Mylpf	-0.0307085	-0.817368	-0.797846	0.39638	1.45121	0.664556	-0.790239	0.376791	-0.797846	0.39638	-0.320645	-92.1516	translation_only	100.037	296.155	149.164	74.3547	23.9879	118.478	91.2888	46.8706	-0.320645
ENSMUSG00000031138	F9	-0.222262	-0.610625	-0.406319	0.398167	1.18264	0.794279	-0.393258	0.375437	-0.406319	0.398167	-0.162501	-110.001	translation_only	89.3948	68.5834	57.6317	47.0913	32.5316	36.6273	20.0635	38.9897	-0.162501
ENSMUSG00000039137	Whrn	-0.303643	-0.519619	-0.220334	0.394303	0.727649	0.511673	-0.217198	0.398466	-0.217198	0.398466	-0.0867944	-120.3	translation_only	212.845	299.273	169.505	180.93	149.843	150.994	127.069	114.895	-0.0867944
ENSMUSG00000029166	Mapre3	-0.121672	-0.20365	-0.0823876	0.398702	0.11178	0.0298023	-0.0820887	0.304837	-0.0823876	0.398702	-0.0329016	-120.856	translation_only	4371.83	4691.73	3647.75	4151.47	4285.96	3955	3890.64	3633.51	-0.0329016
ENSMUSG00000039179	Tekt5	-0.507842	-1.08597	-0.622326	0.400298	1.73508	1.15695	-0.592895	0.366853	-0.622326	0.400298	-0.247447	-115.063	translation_only	53.2112	34.2917	10.1703	29.7419	10.1867	16.0711	6.35343	12.0287	-0.247447
ENSMUSG00000045659	Plekha7	0.175106	0.382126	0.203865	0.400628	0.26005	0.46707	0.20748	0.402968	0.20748	0.402968	0.0818987	65.3807	translation_only	185.175	187.046	264.428	220.586	152.8	152.863	175.555	167.158	0.0818987
ENSMUSG00000031077	Fadd	0.187734	0.595542	0.398014	0.363296	-0.455386	-0.0475774	0.410804	0.403674	0.410804	0.403674	0.161844	72.5035	translation_only	42.569	40.5265	57.6317	66.9193	58.4912	53.8197	51.8306	75.4907	0.161844
ENSMUSG00000003526	Prodh	0.199486	0.496654	0.290632	0.403838	0.23573	0.532899	0.297898	0.389344	0.290632	0.403838	0.114449	68.1167	translation_only	97.9086	77.9356	125.434	123.925	88.3939	59.7996	84.2666	85.0308	0.114449
ENSMUSG00000027349	Fam98b	-0.221144	-0.361121	-0.141759	0.368533	-0.839549	-0.979527	-0.140263	0.405084	-0.140263	0.405084	-0.0550469	-121.483	translation_only	553.396	517.493	420.372	411.429	891.826	998.654	797.523	812.977	-0.0550469
ENSMUSG00000026126	Ptpn18	0.354528	0.807552	0.441888	0.337974	-1.13229	-0.679266	0.459162	0.408261	0.459162	0.408261	0.178643	66.2977	translation_only	31.9267	28.0568	47.4614	57.0053	82.8077	47.0922	90.9544	74.2464	0.178643
ENSMUSG00000021265	Slc25a29	-0.251246	-0.468081	-0.221341	0.382913	-0.125187	-0.342022	-0.218233	0.411226	-0.218233	0.411226	-0.0842201	-118.225	translation_only	195.817	255.629	166.115	156.145	278.655	200.702	199.297	201.17	-0.0842201
ENSMUSG00000010830	Kdelr3	0.158497	0.420627	0.256723	0.411422	0.491413	0.753543	0.262737	0.384	0.256723	0.411422	0.0990213	69.353	translation_only	114.936	127.814	149.164	171.016	76.8929	92.3157	83.9322	103.696	0.0990213
ENSMUSG00000034848	Ttc21b	-0.155497	-0.336252	-0.183846	0.411645	1.86707	1.68632	-0.181045	0.315042	-0.183846	0.411645	-0.0708687	-114.818	translation_only	495.928	436.44	362.741	374.252	128.483	124.084	110.015	115.31	-0.0708687
ENSMUSG00000001065	Zfp276	0.198153	0.43855	0.236386	0.386718	-0.12557	0.114827	0.240806	0.41355	0.240806	0.41355	0.0923424	65.6849	translation_only	129.835	130.932	203.406	151.188	149.185	130.438	170.54	148.078	0.0923424
ENSMUSG00000091089	A930018M24Rik	-0.367034	-1.06427	-0.763049	0.414438	3.14655	2.44932	-0.712132	0.295743	-0.763049	0.414438	-0.291897	-109.028	translation_only	34.0552	43.644	13.5604	22.3064	5.91484	2.61623	3.6783	2.90349	-0.291897
ENSMUSG00000024164	C3	-0.0549254	0.306631	0.359739	0.414725	3.77679	4.13835	0.361522	0.0194133	0.359739	0.414725	0.137507	100.155	translation_only	527.855	501.906	654.289	617.144	52.9049	20.9299	36.783	34.0123	0.137507
ENSMUSG00000079427	Mthfsl	-0.24278	-0.76419	-0.545584	0.363597	-0.210301	-0.731711	-0.533535	0.419672	-0.533535	0.419672	-0.201191	-107.625	translation_only	42.569	31.1743	27.1208	17.3494	31.2172	53.8197	31.0984	40.2341	-0.201191
ENSMUSG00000059022	Kcp	0.327581	0.947636	0.594511	0.424199	0.622607	1.24266	0.630813	0.351408	0.594511	0.424199	0.221414	70.9307	translation_only	14.8991	24.9394	37.2911	37.1774	15.7729	8.96994	16.3852	14.5174	0.221414
ENSMUSG00000018428	Akap1	0.167583	0.286383	0.117591	0.415189	-0.488662	-0.369862	0.118825	0.424978	0.118825	0.424978	0.0441593	59.6651	translation_only	566.167	558.019	705.141	661.757	752.499	800.567	885.134	846.989	0.0441593
ENSMUSG00000029684	Wasl	-0.202372	-0.285392	-0.0836862	0.425387	-0.61612	-0.69914	-0.0831208	0.367868	-0.0836862	0.425387	-0.0310656	-125.34	translation_only	2190.17	2126.08	1762.85	1762.21	3122.71	3392.88	2927.6	2695.68	-0.0310656
ENSMUSG00000029186	Pi4k2b	-0.218292	-0.660422	-0.450052	0.329487	-1.81274	-2.25488	-0.44973	0.425511	-0.44973	0.425511	-0.16689	-108.291	translation_only	57.4681	40.5265	27.1208	34.6989	151.486	191.733	152.482	140.197	-0.16689
ENSMUSG00000026502	Desi2	0.173957	0.495013	0.31791	0.298413	-2.45221	-2.13115	0.322894	0.427979	0.322894	0.427979	0.119012	70.6376	translation_only	59.5965	68.5834	94.9228	84.2687	319.73	366.273	385.888	382.431	0.119012
ENSMUSG00000020333	Acsl6	-0.127904	-0.214471	-0.0868944	0.432067	1.45459	1.36802	-0.0866982	0.254615	-0.0868944	0.432067	-0.0316685	-120.811	translation_only	3754.58	3662.98	3146.01	3212.12	1197.1	1468.45	1200.8	1221.12	-0.0316685
ENSMUSG00000026584	Scyl3	0.130415	0.375713	0.241611	0.433801	1.90595	2.15125	0.245505	0.270552	0.241611	0.433801	0.0876348	70.8575	translation_only	291.597	208.868	349.18	307.333	61.7772	71.3858	61.528	83.3716	0.0876348
ENSMUSG00000036850	Mrpl41	-0.181922	-0.310571	-0.130444	0.427154	0.19342	0.0647714	-0.129024	0.433915	-0.129024	0.433915	-0.0467836	-120.36	translation_only	578.938	648.425	430.543	542.79	512.619	539.692	436.715	484.883	-0.0467836
ENSMUSG00000034402	Kcnh5	-0.227127	-0.591424	-0.37076	0.434334	4.69381	4.32951	-0.365409	0.0723405	-0.37076	0.434334	-0.13428	-111.008	translation_only	421.433	367.856	257.648	265.199	14.4585	15.6974	10.7005	14.9322	-0.13428
ENSMUSG00000027544	Nfatc2	0.204613	0.527504	0.315053	0.405232	-0.423226	-0.100335	0.32519	0.435718	0.32519	0.435718	0.117327	68.7993	translation_only	57.4681	62.3485	81.3624	89.2257	93.323	63.9108	81.2571	99.1334	0.117327
ENSMUSG00000034525	Ice1	0.126063	0.236061	0.10891	0.437827	0.564739	0.674738	0.110037	0.361581	0.10891	0.437827	0.0390657	61.8966	translation_only	923.746	922.758	1101.78	1063.27	593.127	635.371	713.257	617.614	0.0390657
ENSMUSG00000070687	Htr1d	-0.207447	-0.404938	-0.200336	0.357317	-1.81714	-2.01463	-0.198874	0.438757	-0.198874	0.438757	-0.0711523	-117.126	translation_only	257.542	202.633	169.505	178.451	736.726	873.074	677.142	707.207	-0.0711523
ENSMUSG00000102692	Dchs2	-0.105138	-0.676727	-0.617618	0.441076	3.0818	2.51021	-0.579492	0.323281	-0.617618	0.441076	-0.219555	-98.831	translation_only	38.3121	56.1137	33.901	24.7849	5.58623	5.23247	5.01587	4.97741	-0.219555
ENSMUSG00000035356	Nfkbiz	0.247173	0.586238	0.334122	0.342376	-1.23299	-0.893922	0.34159	0.441194	0.34159	0.441194	0.121391	67.1385	translation_only	38.3121	77.9356	81.3624	86.7472	127.498	133.428	171.208	136.049	0.121391
ENSMUSG00000035831	Krt25	-0.227089	-0.74837	-0.565767	0.441525	2.22595	1.70467	-0.530556	0.381151	-0.565767	0.441525	-0.200873	-106.88	translation_only	38.3121	49.8788	27.1208	24.7849	7.55785	10.8387	5.68465	9.95482	-0.200873
ENSMUSG00000040043	Rbms2	0.239456	0.529643	0.287182	0.323405	-2.01353	-1.72335	0.291741	0.44182	0.291741	0.44182	0.103496	65.6719	translation_only	65.9819	90.4053	132.214	91.7042	324.33	288.159	336.398	382.431	0.103496
ENSMUSG00000041608	Entpd3	-0.219503	-0.296494	-0.0772898	0.442032	0.9364	0.85941	-0.0769815	0.291056	-0.0772898	0.442032	-0.0274028	-126.514	translation_only	4474	4336.34	3529.09	3606.2	2102.4	2431.6	1903.69	1963.17	-0.0274028
ENSMUSG00000031448	Adprhl1	-0.178009	-0.576316	-0.419049	0.443046	1.89955	1.50125	-0.402589	0.397824	-0.419049	0.443046	-0.148155	-107.165	translation_only	55.3396	87.2879	40.6812	52.0483	19.0589	17.9399	16.7196	15.7618	-0.148155
ENSMUSG00000050105	Grrp1	0.400904	0.885773	0.466927	0.423126	-0.487006	-0.00213873	0.494418	0.443344	0.494418	0.443344	0.174658	65.6483	translation_only	17.0276	28.0568	44.0713	37.1774	41.4039	19.0611	43.8053	35.6714	0.174658
ENSMUSG00000026167	Wnt10a	-0.0920332	0.674185	0.744666	0.444116	2.03469	2.80091	0.769354	0.19975	0.744666	0.444116	0.262498	97.7734	translation_only	46.8259	24.9394	94.9228	24.7849	13.8013	3.73748	5.68465	10.7844	0.262498
ENSMUSG00000006333	Rps9	0.120772	0.214514	0.0929434	0.446048	-1.75774	-1.66399	0.0938234	0.383073	0.0929434	0.446048	0.0325877	60.6203	translation_only	1260.04	1278.14	1393.33	1526.75	4694.41	3742.71	4399.59	4716.51	0.0325877
ENSMUSG00000035365	Parpbp	0.0238278	0.651035	0.607628	0.446357	1.77788	2.40509	0.631036	0.238748	0.607628	0.446357	0.212862	87.9039	translation_only	40.4405	28.0568	54.2416	54.5268	9.52946	10.4649	11.0349	9.12525	0.212862
ENSMUSG00000047793	Sned1	0.140883	0.311577	0.168809	0.446481	1.98283	2.15352	0.17083	0.310573	0.168809	0.446481	0.0591164	65.6694	translation_only	572.553	495.671	769.553	565.096	143.27	123.71	140.444	152.226	0.0591164
ENSMUSG00000007739	Cct4	0.054924	0.158246	0.103074	0.447164	1.20181	1.30514	0.103402	0.160634	0.103074	0.447164	0.0360277	70.8591	translation_only	3969.56	3843.79	4190.16	4476.15	1406.75	1939.75	1500.08	1951.56	0.0360277
ENSMUSG00000028028	Alpk1	0.316333	0.598191	0.275365	0.447891	0.761768	1.04363	0.283268	0.410646	0.275365	0.447891	0.0960549	62.1294	translation_only	91.5233	84.1705	111.873	151.188	49.2903	53.0722	65.5407	60.9733	0.0960549
ENSMUSG00000038060	Dlec1	0.0931387	0.75058	0.634026	0.449824	1.51714	2.17458	0.663848	0.274046	0.634026	0.449824	0.21998	82.9264	translation_only	21.2845	34.2917	57.6317	34.6989	11.1725	7.47495	9.02856	10.7844	0.21998
ENSMUSG00000001349	Cnn1	-0.283157	-0.657254	-0.395452	0.449852	1.72996	1.35586	-0.379776	0.40512	-0.395452	0.449852	-0.137194	-113.307	translation_only	72.3672	77.9356	47.4614	47.0913	24.9738	19.4349	20.0635	16.1766	-0.137194
ENSMUSG00000048988	Elfn1	-0.181955	-0.312421	-0.132092	0.449972	1.68429	1.55383	-0.130867	0.349301	-0.132092	0.449972	-0.0458115	-120.217	translation_only	853.508	773.122	644.119	661.757	229.693	270.22	216.017	221.495	-0.0458115
ENSMUSG00000035765	Dym	-0.120577	-0.211586	-0.091503	0.45125	2.1803	2.08929	-0.0911557	0.276887	-0.091503	0.45125	-0.0316219	-119.678	translation_only	3109.66	3008.32	2495.11	2751.12	618.758	710.868	584.516	630.057	-0.0316219
ENSMUSG00000044921	Rassf9	-0.274379	-0.562201	-0.298713	0.445134	0.759432	0.47161	-0.291567	0.454817	-0.291567	0.454817	-0.0997635	-116.014	translation_only	117.065	87.2879	61.0218	76.8332	65.7204	54.1934	45.1428	53.5072	-0.0997635
ENSMUSG00000075324	Fign	-0.243747	-0.498897	-0.257908	0.356487	-2.09246	-2.34761	-0.257062	0.455797	-0.257062	0.455797	-0.0877169	-116.039	translation_only	110.679	152.754	91.5327	91.7042	528.392	564.359	467.145	449.211	-0.0877169
ENSMUSG00000038242	Aox4	-0.205388	-0.434732	-0.236592	0.460758	1.26352	1.03417	-0.230855	0.428712	-0.236592	0.460758	-0.0796197	-115.288	translation_only	185.175	162.106	122.044	133.839	62.4344	80.7295	60.1904	63.0472	-0.0796197
ENSMUSG00000061171	Slc38a11	-0.51664	-0.931991	-0.435914	0.464928	3.48674	3.07139	-0.419271	0.252638	-0.435914	0.464928	-0.144991	-119.001	translation_only	138.349	121.58	57.6317	76.8332	9.85806	13.0812	8.02539	7.8809	-0.144991
ENSMUSG00000024666	Tmem138	0.0904238	0.983728	0.895417	0.195626	-1.8791	-0.985797	0.896768	0.465172	0.896768	0.465172	0.298073	84.7482	translation_only	65.9819	12.4697	111.873	44.6128	139.327	148.004	145.46	158.448	0.298073
ENSMUSG00000036834	Plch1	0.252957	0.728215	0.458267	0.46632	1.0182	1.49346	0.479441	0.36295	0.458267	0.46632	0.151831	70.8445	translation_only	38.3121	31.1743	47.4614	66.9193	12.4869	21.6774	18.3915	21.9836	0.151831
ENSMUSG00000028099	Polr3c	0.141619	0.326759	0.181966	0.466445	1.1191	1.30424	0.185203	0.376103	0.181966	0.466445	0.0602672	66.5678	translation_only	274.57	255.629	342.4	322.204	105.81	135.297	139.776	124.02	0.0602672
ENSMUSG00000035842	Ddx11	0.250659	0.726895	0.457199	0.466866	0.573452	1.04969	0.480919	0.418717	0.457199	0.466866	0.151245	70.974	translation_only	36.1836	18.7046	54.2416	39.6559	22.3449	14.9499	19.7291	24.4723	0.151245
ENSMUSG00000078779	Zfp59	-0.159178	-0.737225	-0.642818	0.472571	2.89889	2.32085	-0.590008	0.392767	-0.642818	0.472571	-0.209259	-102.184	translation_only	27.6698	40.5265	20.3406	19.8279	3.28602	5.60621	3.34391	4.56263	-0.209259
ENSMUSG00000025044	Msr1	0.312966	0.697099	0.370474	0.470237	0.108812	0.492945	0.388084	0.473633	0.388084	0.473633	0.125956	65.822	translation_only	34.0552	31.1743	50.8515	54.5268	30.2314	29.5261	38.455	35.2567	0.125956
ENSMUSG00000038560	Sp6	0.220675	0.69111	0.457736	0.391467	-1.03717	-0.566738	0.476239	0.4745	0.476239	0.4745	0.154189	72.2915	translation_only	27.6698	15.5871	33.901	37.1774	46.9901	42.6072	51.4963	52.2628	0.154189
ENSMUSG00000029188	Slc34a2	-0.297135	-0.65128	-0.37512	0.472853	1.04011	0.685971	-0.360325	0.47614	-0.360325	0.47614	-0.11612	-114.524	translation_only	61.725	59.2311	33.901	42.1343	23.6593	34.3848	22.4042	24.4723	-0.11612
ENSMUSG00000037126	Psd	0.214814	0.451629	0.230655	0.462221	-0.314554	-0.077739	0.237914	0.479232	0.237914	0.479232	0.0760024	64.5622	translation_only	91.5233	102.875	145.774	118.968	138.013	98.2956	151.814	120.702	0.0760024
ENSMUSG00000036273	Lrrk2	-0.181551	-0.297707	-0.117444	0.484256	2.22855	2.1124	-0.116258	0.273566	-0.117444	0.484256	-0.0369861	-121.376	translation_only	1632.52	1527.54	1227.22	1328.47	277.012	388.324	256.144	326.435	-0.0369861
ENSMUSG00000050930	Map10	-0.260272	-0.565156	-0.318841	0.484362	1.86579	1.56091	-0.308073	0.430918	-0.318841	0.484362	-0.100381	-114.728	translation_only	134.092	81.0531	61.0218	84.2687	23.9879	35.1323	24.0762	24.8871	-0.100381
ENSMUSG00000061816	Myl1	-0.313646	-0.726807	-0.446131	0.484521	0.981854	0.568694	-0.422214	0.470296	-0.446131	0.484521	-0.140392	-113.342	translation_only	36.1836	74.8182	47.4614	19.8279	7.22924	47.0922	25.7481	17.4209	-0.140392
ENSMUSG00000029802	Abcg2	0.10597	0.177053	0.0706378	0.486045	0.207679	0.278763	0.0711083	0.39516	0.0706378	0.486045	0.0221325	59.0987	translation_only	2458.36	2606.17	2871.41	2815.57	2125.07	2182.69	2304.62	2299.98	0.0221325
ENSMUSG00000038496	Slc19a3	0.324515	0.847826	0.503543	0.486744	0.971972	1.49528	0.529413	0.423301	0.503543	0.486744	0.157458	69.0551	translation_only	40.4405	6.23485	44.0713	44.6128	12.1583	12.7074	16.3852	14.5174	0.157458
ENSMUSG00000055210	Foxd2	-0.241009	-0.463782	-0.228448	0.428578	-0.882331	-1.1051	-0.224894	0.486816	-0.224894	0.486816	-0.0703098	-117.459	translation_only	131.964	165.224	91.5327	118.968	310.2	223.875	203.644	245.967	-0.0703098
ENSMUSG00000029913	Prdm5	-0.359688	-0.7226	-0.380985	0.451853	0.30496	-0.0579518	-0.370377	0.490048	-0.370377	0.490048	-0.114728	-116.463	translation_only	59.5965	49.8788	37.2911	29.7419	41.0753	46.7185	33.1047	34.8419	-0.114728
ENSMUSG00000036606	Plxnb2	0.0953927	0.225635	0.129149	0.49028	1.54162	1.67186	0.130321	0.241733	0.129149	0.49028	0.0399786	67.0826	translation_only	1138.72	1140.98	1274.68	1370.61	468.258	301.241	464.469	352.567	0.0399786
ENSMUSG00000051067	Lingo3	-0.324213	-0.586687	-0.274707	0.491023	1.26206	0.999584	-0.265922	0.473121	-0.274707	0.491023	-0.0848564	-118.926	translation_only	106.422	121.58	84.7525	66.9193	43.0469	50.0822	36.1143	37.7454	-0.0848564
ENSMUSG00000020649	Rrm2	0.206461	0.511879	0.295566	0.478267	-0.0209066	0.284512	0.307225	0.493239	0.307225	0.493239	0.0943005	68.0339	translation_only	51.0828	52.9962	81.3624	66.9193	46.9901	56.8096	57.5153	61.3881	0.0943005
ENSMUSG00000032363	Adamts7	0.320196	0.683735	0.350182	0.498088	0.813688	1.17723	0.365997	0.428913	0.350182	0.498088	0.105998	64.9061	translation_only	51.0828	40.5265	84.7525	64.4408	31.5458	20.1824	34.7767	29.4497	0.105998
ENSMUSG00000030413	Pglyrp1	0.13949	0.508383	0.356563	0.499766	1.36152	1.73041	0.370487	0.378981	0.356563	0.499766	0.107409	74.6568	translation_only	78.7526	43.644	88.1426	89.2257	23.0021	25.0411	32.1016	20.3244	0.107409
ENSMUSG00000025085	Ablim1	-0.22266	-0.293303	-0.0711616	0.500298	-0.218964	-0.289607	-0.0708231	0.416301	-0.0711616	0.500298	-0.0214034	-127.204	translation_only	2556.27	2671.63	2145.93	2094.32	2774.72	3206.38	2641.69	2447.64	-0.0214034
ENSMUSG00000038910	Plcl2	0.168565	0.322833	0.151616	0.502662	0.590019	0.744288	0.154529	0.48136	0.151616	0.502662	0.0452912	62.4291	translation_only	323.524	230.69	389.861	312.29	200.119	166.318	214.679	194.534	0.0452912
ENSMUSG00000041669	Prima1	0.345134	0.653311	0.300226	0.507741	1.36452	1.6727	0.309709	0.397234	0.300226	0.507741	0.0883739	62.1532	translation_only	74.4957	84.1705	94.9228	148.709	35.1604	25.0411	33.4391	42.7228	0.0883739
ENSMUSG00000023951	Vegfa	-0.248514	-0.371766	-0.125359	0.47433	-0.654151	-0.777403	-0.12371	0.509865	-0.12371	0.509865	-0.0361907	-123.761	translation_only	423.561	452.027	362.741	312.29	666.405	686.201	607.255	523.043	-0.0361907
ENSMUSG00000045210	Vcpip1	-0.149029	-0.220343	-0.07179	0.511395	0.733021	0.661707	-0.0714675	0.396248	-0.07179	0.511395	-0.0209084	-124.073	translation_only	2756.34	2802.57	2420.53	2327.3	1500.07	1790.25	1482.02	1464.19	-0.0209084
ENSMUSG00000032231	Anxa2	0.108099	0.165305	0.057113	0.512953	0.85511	0.912315	0.0572086	0.268132	0.057113	0.512953	0.0165584	56.8177	translation_only	26844	27240.1	29541.3	30750.6	15248.4	14162.8	16464.1	15025.1	0.0165584
ENSMUSG00000063838	Cdc42ep5	0.256414	0.570381	0.304091	0.475928	-0.435379	-0.121412	0.316078	0.517416	0.316078	0.517416	0.0904489	65.7938	translation_only	46.8259	37.4091	61.0218	64.4408	60.4628	52.6984	61.8624	72.5872	0.0904489
ENSMUSG00000071537	Klrg2	-0.299077	-0.629705	-0.352071	0.517422	1.84842	1.51779	-0.334937	0.476074	-0.352071	0.517422	-0.100747	-115.405	translation_only	70.2388	77.9356	30.5109	61.9623	25.3024	14.9499	16.3852	16.1766	-0.100747
ENSMUSG00000026162	Nhej1	0.261863	0.637033	0.362865	0.473358	-0.556782	-0.181613	0.380554	0.51945	0.380554	0.51945	0.108251	67.6541	translation_only	29.7983	28.0568	33.901	54.5268	35.489	48.5872	46.146	53.922	0.108251
ENSMUSG00000040462	Os9	0.119168	0.186841	0.0672321	0.524431	1.56389	1.63156	0.0677143	0.3558	0.0672321	0.524431	0.0188459	57.47	translation_only	3954.66	3747.15	4281.7	4441.46	1335.44	1230.38	1400.1	1368.37	0.0188459
ENSMUSG00000073747	Gm7534	0.169319	0.485084	0.305892	0.526768	1.47199	1.78775	0.316768	0.395858	0.305892	0.526768	0.0851543	70.7584	translation_only	83.0095	68.5834	111.873	101.618	26.9454	27.2836	25.4137	35.2567	0.0851543
ENSMUSG00000034533	Scn10a	-0.196108	-0.250453	-0.0543351	0.528234	2.68106	2.62672	-0.0543186	0.297164	-0.0543351	0.528234	-0.0150603	-128.061	translation_only	26141.6	25581.6	21839	21409.2	3838.07	4099.26	3299.1	3582.49	-0.0150603
ENSMUSG00000042717	Ppp1r3a	-0.335074	-0.756988	-0.466843	0.528603	2.31378	1.89187	-0.432161	0.479767	-0.466843	0.528603	-0.129255	-113.876	translation_only	34.0552	56.1137	30.5109	22.3064	5.25763	12.3337	6.35343	7.46612	-0.129255
ENSMUSG00000031007	Atp6ap2	0.130416	0.187142	0.0564238	0.540016	-0.863391	-0.806665	0.0566657	0.414154	0.0564238	0.540016	0.0150986	55.1281	translation_only	4320.75	4280.23	4874.96	4865.28	7935.74	7461.5	8611.24	8130.6	0.0150986
ENSMUSG00000031095	Cul4b	-0.145486	-0.266245	-0.12198	0.540578	3.53673	3.41597	-0.121008	0.305086	-0.12198	0.540578	-0.0325859	-118.654	translation_only	1632.52	1334.26	1291.63	1179.76	117.64	135.297	107.674	119.458	-0.0325859
ENSMUSG00000028885	Smpdl3b	0.335467	0.714083	0.364498	0.498048	-0.52169	-0.143075	0.385722	0.543716	0.385722	0.543716	0.102073	64.8364	translation_only	23.4129	24.9394	30.5109	47.0913	31.8744	36.2535	41.7989	43.5523	0.102073
ENSMUSG00000026564	Dusp27	0.0905574	0.542537	0.437136	0.54418	2.44799	2.89997	0.453661	0.265073	0.437136	0.54418	0.115517	80.5239	translation_only	61.725	65.4659	77.9723	104.097	10.1867	12.7074	13.3757	10.7844	0.115517
ENSMUSG00000033400	Agl	-0.240912	-0.312543	-0.0721905	0.546431	1.60198	1.53035	-0.0717201	0.363366	-0.0721905	0.546431	-0.0189475	-127.625	translation_only	4237.74	4033.95	3478.24	3165.03	1162.92	1522.27	1059.02	1197.07	-0.0189475
ENSMUSG00000053914	Kdm4d	-0.464438	-0.878834	-0.45138	0.547467	3.06144	2.64705	-0.423212	0.45109	-0.45138	0.547467	-0.1181	-117.855	translation_only	72.3672	43.644	16.9505	44.6128	7.88645	5.97996	5.01587	4.97741	-0.1181
ENSMUSG00000034758	Tle6	-0.421618	-0.728598	-0.329894	0.556247	1.83537	1.52839	-0.313206	0.52402	-0.329894	0.556247	-0.0840345	-120.057	translation_only	87.2664	49.8788	47.4614	37.1774	22.0163	16.4449	14.0444	14.5174	-0.0840345
ENSMUSG00000072825	Cep170b	0.120192	0.187335	0.0666853	0.557032	-0.46959	-0.402447	0.0671889	0.454048	0.0666853	0.557032	0.016946	57.3163	translation_only	2122.06	2313.13	2579.87	2436.36	3215.04	2810.96	3505.76	3000.55	0.016946
ENSMUSG00000002020	Ltbp2	-0.252922	-0.453731	-0.208835	0.55977	2.25266	2.05186	-0.202286	0.460993	-0.208835	0.55977	-0.0526245	-119.136	translation_only	208.588	187.046	138.994	148.709	45.6757	36.2535	31.0984	37.3306	-0.0526245
ENSMUSG00000058152	Chsy3	-0.318655	-0.533879	-0.226852	0.563284	1.78256	1.56734	-0.217725	0.512388	-0.226852	0.563284	-0.056548	-120.832	translation_only	134.092	140.284	88.1426	99.1396	36.1462	42.2335	34.1079	28.2053	-0.056548
ENSMUSG00000006585	Cdt1	0.234612	0.575654	0.327778	0.564982	1.38219	1.72323	0.342803	0.439702	0.327778	0.564982	0.0812776	67.8263	translation_only	53.2112	52.9962	94.9228	64.4408	24.3166	15.6974	22.4042	24.4723	0.0812776
ENSMUSG00000020390	Ube2b	-0.197122	-0.257083	-0.0607671	0.578404	-1.80895	-1.86891	-0.0601569	0.556885	-0.0607671	0.578404	-0.0144485	-127.48	translation_only	1838.98	1730.17	1396.72	1568.88	5693.69	6634.77	5407.11	5271.49	-0.0144485
ENSMUSG00000028464	Tpm2	-0.302155	-0.452891	-0.155339	0.580846	2.24829	2.09755	-0.151508	0.475011	-0.155339	0.580846	-0.0366506	-123.71	translation_only	329.909	414.618	294.939	245.371	62.763	90.4469	61.8624	61.3881	-0.0366506
ENSMUSG00000060572	Mfap2	0.266766	0.504492	0.231926	0.523195	-0.732698	-0.494972	0.239543	0.583262	0.239543	0.583262	0.0560856	62.131	translation_only	72.3672	40.5265	81.3624	81.7902	98.5806	90.4469	118.04	107.844	0.0560856
ENSMUSG00000038677	Scube3	0.269849	0.688472	0.39657	0.58789	1.30871	1.72733	0.423872	0.462385	0.39657	0.58789	0.0914903	68.5971	translation_only	31.9267	28.0568	61.0218	37.1774	13.4727	10.4649	13.3757	15.347	0.0914903
ENSMUSG00000001773	Folh1	0.291677	0.419884	0.12721	0.58814	3.03352	3.16173	0.128193	0.271246	0.12721	0.58814	0.0293243	55.2138	translation_only	1091.89	941.463	1383.16	1338.39	106.796	139.034	121.05	177.942	0.0293243
ENSMUSG00000039050	Osbpl2	-0.195881	-0.282873	-0.0886966	0.588155	1.39332	1.30633	-0.0871959	0.508704	-0.0886966	0.588155	-0.0204453	-124.701	translation_only	940.774	875.997	759.382	731.155	306.914	375.616	276.542	315.236	-0.0204453
ENSMUSG00000036632	Alg5	0.201519	0.3062	0.102462	0.589581	-0.213087	-0.108406	0.104614	0.588688	0.102462	0.589581	0.0235105	56.6499	translation_only	334.166	296.155	389.861	389.123	349.961	372.626	369.837	455.848	0.0235105
ENSMUSG00000040850	Psme4	0.152716	0.220434	0.0671113	0.592083	0.718884	0.786602	0.0676211	0.473857	0.0671113	0.592083	0.0152757	55.2858	translation_only	2198.69	1995.15	2583.26	2300.04	1105.42	1409.4	1382.04	1393.26	0.0152757
ENSMUSG00000032561	Acpp	-0.147677	-0.206153	-0.0587286	0.599233	1.11714	1.05866	-0.0585501	0.373977	-0.0587286	0.599233	-0.0130615	-125.616	translation_only	6070.33	6078.98	5176.68	5291.58	2457.61	3055.01	2161.51	2780.3	-0.0130615
ENSMUSG00000020585	Laptm4a	0.131433	0.176302	0.0447871	0.601203	-0.798263	-0.753393	0.0448198	0.443489	0.0447871	0.601203	0.00989699	53.2956	translation_only	9169.35	9211.99	10163.5	10481.5	15525.1	15923.9	16609.2	17606.8	0.00989699
ENSMUSG00000034311	Kif4	0.131449	0.837411	0.675132	0.602826	2.56806	3.27402	0.712724	0.238222	0.675132	0.602826	0.148399	81.079	translation_only	25.5414	24.9394	50.8515	39.6559	4.27183	4.11122	3.34391	5.80698	0.148399
ENSMUSG00000027002	Nckap1	0.216197	0.165024	-0.0514798	0.605749	0.846297	0.795124	-0.0511915	0.457322	-0.0514798	0.605749	-0.0112075	37.3546	translation_only	7153.71	6845.87	8200.65	7435.47	3433.89	4235.31	4282.21	4563.87	-0.0112075
ENSMUSG00000024975	Pdcd4	-0.216347	-0.282365	-0.0671525	0.609712	0.614586	0.548568	-0.0660959	0.574021	-0.0671525	0.609712	-0.0144294	-127.459	translation_only	1243.01	1150.33	1000.08	964.133	731.14	811.032	646.713	671.536	-0.0144294
ENSMUSG00000027889	Ampd2	-0.225636	-0.289871	-0.0653111	0.610472	0.0550069	-0.00922864	-0.064323	0.581719	-0.0653111	0.610472	-0.0139984	-127.897	translation_only	1181.29	1234.5	952.618	1006.27	1220.1	1063.69	1009.53	930.776	-0.0139984
ENSMUSG00000031004	Mki67	-0.144642	0.360312	0.500067	0.611964	5.05682	5.56178	0.505405	0.0257963	0.500067	0.611964	0.106651	111.872	translation_only	257.542	218.22	345.79	270.156	5.58623	8.59619	5.68465	7.05133	0.106651
ENSMUSG00000064105	Cnnm2	0.231458	0.335344	0.101798	0.612811	1.09028	1.19416	0.103854	0.555881	0.101798	0.612811	0.0216497	55.3862	translation_only	378.864	442.674	555.976	473.392	195.19	182.015	228.724	211.125	0.0216497
ENSMUSG00000019894	Slc6a15	0.128362	0.179868	0.0511143	0.615116	-0.517131	-0.465625	0.0514979	0.564987	0.0511143	0.615116	0.0107873	54.4866	translation_only	2511.57	2200.9	2668.01	2659.42	3244.95	3414.18	3638.18	3590.79	0.0107873
ENSMUSG00000033597	Caskin1	-0.180223	-0.230096	-0.0502274	0.620059	1.35502	1.30515	-0.0499962	0.513929	-0.0502274	0.620059	-0.0104256	-128.07	translation_only	4231.35	3996.54	3600.29	3393.05	1619.02	1549.18	1439.55	1337.68	-0.0104256
ENSMUSG00000052837	Junb	0.220921	0.303503	0.0811523	0.621648	0.230955	0.313538	0.0825455	0.60989	0.0811523	0.621648	0.0167544	53.9491	translation_only	449.103	498.788	555.976	599.795	393.994	397.294	456.444	459.581	0.0167544
ENSMUSG00000035232	Pdk3	-0.214466	-0.284087	-0.0707873	0.622624	0.770804	0.701183	-0.0698973	0.555696	-0.0707873	0.622624	-0.0145662	-127.05	translation_only	1204.7	1162.8	918.717	1011.22	598.056	769.546	545.727	624.665	-0.0145662
ENSMUSG00000052384	Nrros	0.270051	0.434653	0.158414	0.620577	-0.371156	-0.206554	0.16568	0.629201	0.16568	0.629201	0.0333366	58.1472	translation_only	87.2664	112.227	159.335	109.054	155.429	95.3056	144.123	156.788	0.0333366
ENSMUSG00000026674	Ddr2	0.204628	0.279205	0.0733579	0.631264	0.116539	0.191116	0.0746678	0.610397	0.0733579	0.631264	0.0146561	53.7625	translation_only	595.965	607.898	772.943	684.063	568.482	522.873	654.404	594.801	0.0146561
ENSMUSG00000032281	Acsbg1	-0.153169	-0.212609	-0.0598543	0.631812	2.2182	2.15876	-0.0595238	0.474696	-0.0598543	0.631812	-0.0119357	-125.77	translation_only	2803.17	2774.51	2366.29	2419.01	613.171	566.228	481.858	572.402	-0.0119357
ENSMUSG00000033991	Ttc37	0.164785	0.235308	0.069342	0.632736	0.843849	0.914371	0.0705088	0.570105	0.069342	0.632736	0.0137836	54.9965	translation_only	919.49	835.47	1030.59	1031.05	457.414	508.297	544.723	530.094	0.0137836
ENSMUSG00000020189	Osbpl8	0.155138	0.215557	0.0595027	0.633454	-0.0656064	-0.00518793	0.0605323	0.570761	0.0595027	0.633454	0.0117985	54.2571	translation_only	1326.02	1243.85	1525.54	1452.4	1356.47	1295.04	1597.39	1334.78	0.0117985
ENSMUSG00000028559	Osbpl9	-0.243585	-0.301687	-0.0587214	0.634362	0.661995	0.603894	-0.0582501	0.541443	-0.0587214	0.634362	-0.011607	-128.918	translation_only	2273.18	2076.21	1810.31	1712.64	1184.28	1528.25	1074.06	1200.8	-0.011607
ENSMUSG00000032812	Arap1	0.174929	0.243393	0.0673371	0.635575	0.103775	0.172239	0.0683833	0.547841	0.0673371	0.635575	0.0132542	54.2948	translation_only	1136.59	1116.04	1410.28	1251.64	1169.17	893.257	1235.58	1078.02	0.0132542
ENSMUSG00000031012	Cask	0.149742	0.204282	0.0538926	0.639443	-0.0357384	0.0188022	0.0545653	0.588456	0.0538926	0.639443	0.0104658	53.7581	translation_only	1553.77	1440.25	1674.71	1759.73	1461.95	1565.63	1732.82	1602.31	0.0104658
ENSMUSG00000055775	Myh8	-0.424834	-0.731587	-0.352248	0.639736	3.0066	2.69985	-0.316176	0.595282	-0.352248	0.639736	-0.0683358	-120.144	translation_only	36.1836	59.2311	20.3406	34.6989	6.24344	5.23247	4.34709	4.14784	-0.0683358
ENSMUSG00000054967	Zfp647	0.0149376	0.687833	0.652458	0.642827	3.37542	4.04831	0.676974	0.169746	0.652458	0.642827	0.12521	88.7559	translation_only	38.3121	43.644	74.5822	57.0053	3.61462	4.11122	4.0127	3.73306	0.12521
ENSMUSG00000051316	Taf7	-0.266224	-0.357845	-0.0942003	0.656095	1.55857	1.46695	-0.0920707	0.612426	-0.0942003	0.656095	-0.0172418	-126.648	translation_only	442.717	542.432	400.032	361.86	149.843	177.156	135.094	134.805	-0.0172418
ENSMUSG00000040631	Dok4	-0.207654	-0.249566	-0.0423764	0.657629	-0.970081	-1.01199	-0.0420676	0.619807	-0.0423764	0.657629	-0.0077133	-129.763	translation_only	2735.06	2855.56	2281.54	2384.31	5269.46	5494.09	4717.93	4538.98	-0.0077133
ENSMUSG00000066720	Cldn9	-0.364953	-0.550142	-0.197775	0.627965	0.23671	0.0515206	-0.189013	0.660747	-0.189013	0.660747	-0.0340157	-123.559	translation_only	74.4957	87.2879	57.6317	52.0483	61.12	73.2545	56.1777	47.2854	-0.0340157
ENSMUSG00000019820	Utrn	-0.229523	-0.185616	0.0437503	0.662676	0.874807	0.918714	0.0438967	0.522724	0.0437503	0.662676	0.00781814	-141.037	translation_only	7511.29	6842.75	6390.34	6183.83	3661.94	4051.8	3446.57	3086.41	0.00781814
ENSMUSG00000027018	Hat1	-0.272794	-0.358844	-0.0892799	0.67813	1.45012	1.36407	-0.0866329	0.622516	-0.0892799	0.67813	-0.0150604	-127.242	translation_only	476.772	495.671	376.301	376.731	145.242	204.814	133.757	153.885	-0.0150604
ENSMUSG00000025151	Maged1	0.115809	0.150917	0.0350947	0.678728	1.27329	1.30839	0.0350806	0.503497	0.0350947	0.678728	0.0059066	52.4986	translation_only	22589.2	22620	24398.5	25501.2	9098.33	9304.82	10148.1	9657.84	0.0059066
ENSMUSG00000078851	Hist3h2a	0.205557	0.265646	0.0590656	0.674329	-0.51303	-0.452942	0.0599916	0.678878	0.0599916	0.678878	0.0100911	52.2673	translation_only	578.938	664.012	742.432	736.112	848.122	888.024	1007.19	980.965	0.0100911
ENSMUSG00000026223	Itm2c	-0.210932	-0.246342	-0.0355466	0.67911	-0.934863	-0.970272	-0.0354919	0.593878	-0.0355466	0.67911	-0.00597396	-130.572	translation_only	6840.83	7322.83	5881.82	5975.64	13787.5	12819.9	11307.4	11528.9	-0.00597396
ENSMUSG00000046111	Cep295	0.193816	0.32239	0.125193	0.687563	2.09565	2.22423	0.12863	0.541218	0.125193	0.687563	0.0203672	58.9864	translation_only	287.34	249.394	359.351	314.768	61.12	63.1633	77.5788	63.462	0.0203672
ENSMUSG00000028980	H6pd	0.222871	0.29989	0.0750247	0.69568	0.32731	0.404329	0.0770634	0.678314	0.0750247	0.69568	0.0118232	53.3812	translation_only	325.653	392.796	433.933	438.693	298.699	260.128	312.321	335.975	0.0118232
ENSMUSG00000037347	Chst7	0.318679	0.667611	0.322116	0.696837	1.00082	1.34976	0.356633	0.600271	0.322116	0.696837	0.0505299	64.4829	translation_only	17.0276	28.0568	23.7307	44.6128	14.1299	7.47495	14.3788	12.4435	0.0505299
ENSMUSG00000029648	Flt1	-0.223692	-0.276884	-0.0546591	0.699044	0.280268	0.227076	-0.05336	0.68756	-0.0546591	0.699044	-0.00849925	-128.934	translation_only	898.205	857.292	722.091	721.241	688.093	736.657	568.8	643.33	-0.00849925
ENSMUSG00000055322	Tns1	-0.216593	-0.251859	-0.0355584	0.699516	0.284921	0.249655	-0.0353322	0.559728	-0.0355584	0.699516	-0.00551875	-130.695	translation_only	9441.8	9501.91	7726.04	8082.36	8107.6	7186.05	6978.75	6096.08	-0.00551875
ENSMUSG00000019087	Atp6ap1	0.180122	0.149055	-0.0312381	0.700334	-0.151109	-0.182175	-0.031026	0.590019	-0.0312381	0.700334	-0.00483236	39.6087	translation_only	10787	10505.7	11536.5	11941.4	11862.9	11407.2	13299.4	12889	-0.00483236
ENSMUSG00000039860	Srrm3	-0.259981	-0.329674	-0.0720408	0.687425	-0.17126	-0.240953	-0.0700057	0.705617	-0.0700057	0.705617	-0.010601	-128.259	translation_only	408.662	470.731	342.4	349.467	494.875	474.286	430.696	372.891	-0.010601
ENSMUSG00000020271	Fbxw11	0.14328	0.180642	0.0369202	0.70702	-1.00981	-0.972448	0.0373356	0.640924	0.0369202	0.70702	0.005559	51.5795	translation_only	2766.98	2693.46	3051.09	3105.55	5494.88	5330.76	6199.61	5675.91	0.005559
ENSMUSG00000061603	Akap6	0.190393	0.23044	0.0398687	0.709444	1.60296	1.64301	0.0400373	0.544417	0.0398687	0.709444	0.0059437	50.4361	translation_only	15829.3	14355.7	18394.7	16858.7	4381.58	5405.89	5886.96	5201.39	0.0059437
ENSMUSG00000040690	Col16a1	0.397326	0.286458	-0.112898	0.714292	0.746019	0.635153	-0.110915	0.398952	-0.112898	0.714292	-0.0164972	35.7903	translation_only	738.571	766.887	939.058	887.3	590.826	290.028	679.817	473.684	-0.0164972
ENSMUSG00000047963	Stbd1	-0.233541	-0.275872	-0.0432078	0.723615	-0.0968359	-0.139167	-0.0425008	0.701085	-0.0432078	0.723615	-0.00607035	-130.25	translation_only	1417.55	1487.01	1111.95	1261.55	1461.95	1590.3	1181.07	1397.82	-0.00607035
ENSMUSG00000004317	Clcn5	0.191215	0.237549	0.0455215	0.727529	-0.386017	-0.339683	0.0463155	0.714451	0.0455215	0.727529	0.0062888	51.1677	translation_only	906.719	897.819	1149.24	976.525	1092.27	1229.26	1308.81	1323.16	0.0062888
ENSMUSG00000040265	Dnm3	-0.179756	-0.209452	-0.0298809	0.728035	0.698728	0.669032	-0.0297616	0.629808	-0.0298809	0.728035	-0.00411902	-130.637	translation_only	8300.95	8148.95	7149.72	7006.69	4979.96	4994.76	4538.36	4207.99	-0.00411902
ENSMUSG00000024493	Lars	0.161505	0.205251	0.0431461	0.736127	1.63373	1.67747	0.0437405	0.639545	0.0431461	0.736127	0.00574047	51.8019	translation_only	1941.14	1920.33	2332.39	2106.72	585.897	639.108	695.868	664.484	0.00574047
ENSMUSG00000018217	Pmp22	0.17967	0.146911	-0.0329128	0.737879	-0.115227	-0.147985	-0.0327947	0.545987	-0.0329128	0.737879	-0.00434497	39.272	translation_only	17619.3	17993.8	19160.8	20028.7	16124.2	21838.8	20819.5	21869.5	-0.00434497
ENSMUSG00000023915	Tnfrsf21	0.186753	0.216491	0.0294355	0.747067	-0.701182	-0.671445	0.0296642	0.667636	0.0294355	0.747067	0.00372773	49.2176	translation_only	4382.47	4308.28	4949.55	5090.82	6856.28	7051.87	7666.59	8056.77	0.00372773
ENSMUSG00000050299	Gm9843	0.379017	0.279429	-0.100988	0.763655	5.36635	5.26676	-0.0993982	0.506282	-0.100988	0.763655	-0.011826	36.3994	translation_only	619.378	741.947	722.091	902.171	18.4017	13.8287	19.7291	21.9836	-0.011826
ENSMUSG00000064128	Cenpj	-0.385717	-0.483419	-0.10768	0.765745	1.85544	1.75774	-0.10008	0.75166	-0.10768	0.765745	-0.0124819	-128.586	translation_only	153.248	152.754	128.824	91.7042	38.775	44.476	35.7799	27.3758	-0.0124819
ENSMUSG00000028864	Hgf	-0.332265	-0.405123	-0.075416	0.766841	3.01323	2.94037	-0.0733188	0.674067	-0.075416	0.766841	-0.00869506	-129.357	translation_only	634.278	489.436	410.202	438.693	63.7488	74.3758	48.4867	60.5585	-0.00869506
ENSMUSG00000002602	Axl	0.203711	0.245963	0.0410745	0.776166	-0.602341	-0.560089	0.0423538	0.748864	0.0410745	0.776166	0.00452005	50.3678	translation_only	738.571	735.712	857.695	879.864	1222.73	978.471	1203.14	1316.53	0.00452005
ENSMUSG00000057003	Myh4	-0.461998	-0.73563	-0.268195	0.779006	5.38608	5.11245	-0.275861	0.763376	-0.268195	0.779006	-0.0290882	-122.13	translation_only	691.746	1979.57	1108.56	485.784	8.54365	54.5672	27.4201	17.8357	-0.0290882
ENSMUSG00000067367	Lyar	-0.346795	-0.422728	-0.0835069	0.784302	1.48791	1.41197	-0.0770713	0.77761	-0.0835069	0.784302	-0.00881136	-129.364	translation_only	197.946	187.046	142.384	143.752	73.9355	61.2946	48.1523	57.655	-0.00881136
ENSMUSG00000003623	Crot	0.164152	0.247887	0.0830778	0.78515	1.44487	1.5286	0.0838346	0.316343	0.0830778	0.78515	0.0087271	56.4873	translation_only	2513.7	2640.46	3139.23	2946.93	753.156	1108.16	875.102	1195.41	0.0087271
ENSMUSG00000027350	Chgb	-0.23804	-0.271487	-0.0336511	0.787201	3.22328	3.18984	-0.033489	0.676682	-0.0336511	0.787201	-0.00349684	-131.244	translation_only	4327.13	3825.08	3342.64	3388.1	434.412	426.446	343.754	381.602	-0.00349684
ENSMUSG00000034115	Scn11a	-0.167608	-0.193641	-0.0260021	0.787208	3.11143	3.0854	-0.0259945	0.630091	-0.0260021	0.787208	-0.00270189	-130.878	translation_only	22304	22012.1	19686.3	18861.3	2321.9	2725.37	2031.43	2431.47	-0.00270189
ENSMUSG00000029104	Htt	0.198446	0.228581	0.0297235	0.788706	1.26087	1.29101	0.0301605	0.705066	0.0297235	0.788706	0.00306403	49.0367	translation_only	3507.68	3161.07	3983.37	3811.92	1389.99	1354.46	1661.26	1466.26	0.00306403
ENSMUSG00000004113	Cacna1b	0.19039	0.164504	-0.0262615	0.794209	1.155	1.12911	-0.0258542	0.733187	-0.0262615	0.794209	-0.00262786	40.8282	translation_only	3824.82	3644.27	4322.38	4022.59	1585.83	1718.49	2003.67	1740.02	-0.00262786
ENSMUSG00000022449	Adamts20	0.327647	0.446774	0.112051	0.806243	1.69097	1.8101	0.119658	0.714546	0.112051	0.806243	0.0104806	53.7451	translation_only	127.707	81.0531	138.994	148.709	28.2598	36.6273	43.8053	36.9158	0.0104806
ENSMUSG00000021224	Numb	-0.226031	-0.257077	-0.0323137	0.810355	0.548868	0.517822	-0.0313126	0.793946	-0.0323137	0.810355	-0.00295104	-131.323	translation_only	1091.89	1159.68	918.717	949.262	678.563	833.457	654.404	628.813	-0.00295104
ENSMUSG00000024140	Epas1	-0.184775	-0.207121	-0.0227723	0.815305	0.160335	0.137989	-0.0223906	0.781618	-0.0227723	0.815305	-0.00201945	-131.737	translation_only	3118.18	3226.54	2647.67	2805.65	2631.12	2951.11	2490.88	2385.84	-0.00201945
ENSMUSG00000007653	Gabrb2	-0.4443	-0.51496	-0.0751548	0.820689	4.28102	4.21036	-0.0714682	0.723977	-0.0751548	0.820689	-0.0064499	-130.787	translation_only	366.093	414.618	288.158	255.285	15.1157	24.2936	11.3693	17.4209	-0.0064499
ENSMUSG00000063445	Nmral1	0.384571	0.51563	0.11946	0.829273	1.3246	1.45566	0.133078	0.756349	0.11946	0.829273	0.00971244	53.2834	translation_only	55.3396	62.3485	101.703	66.9193	24.6452	21.3036	29.7608	29.8645	0.00971244
ENSMUSG00000021782	Dlg5	0.228871	0.266273	0.0360752	0.836067	0.963899	1.0013	0.0375576	0.803486	0.0360752	0.836067	0.00280517	49.3198	translation_only	644.92	533.08	732.262	689.02	302.642	295.634	361.143	335.146	0.00280517
ENSMUSG00000021728	Emb	-0.227488	-0.207728	0.019602	0.84715	0.665943	0.685704	0.0197366	0.767159	0.019602	0.84715	0.00141213	-137.6	translation_only	7341.02	6792.87	6098.79	6087.17	4099.64	4678.2	3598.38	3847.12	0.00141213
ENSMUSG00000017466	Timp2	-0.164498	-0.179534	-0.0152853	0.849355	-1.70972	-1.72475	-0.0150679	0.803942	-0.0152853	0.849355	-0.00108389	-132.498	translation_only	8758.56	9031.18	7729.43	7879.12	29572.2	27646.5	25003.4	25711.2	-0.00108389
ENSMUSG00000063558	Aox1	-0.284721	-0.310169	-0.0265553	0.85587	2.68573	2.66028	-0.0255952	0.796095	-0.0265553	0.85587	-0.00179493	-132.551	translation_only	1830.47	1798.75	1410.28	1497.01	260.581	294.887	204.647	248.456	-0.00179493
ENSMUSG00000023186	Vwa5a	-0.184963	-0.168449	0.0164038	0.861022	1.81001	1.82653	0.0165462	0.765459	0.0164038	0.861022	0.00106602	-137.675	translation_only	15524.9	16092.2	13885.8	14075.3	4255.72	4613.91	3963.87	3784.49	0.00106602
ENSMUSG00000026102	Inpp1	0.216508	0.242804	0.0251676	0.861391	0.394111	0.420407	0.0262872	0.836339	0.0251676	0.861391	0.00163086	48.2767	translation_only	847.122	798.061	1010.25	934.391	579.325	655.553	709.578	715.088	0.00163086
ENSMUSG00000025235	Bbs4	-0.259177	-0.285655	-0.0277031	0.869286	2.70607	2.67959	-0.0265715	0.832541	-0.0277031	0.869286	-0.00168538	-132.218	translation_only	1153.62	1000.69	922.107	847.644	151.486	174.914	133.088	137.708	-0.00168538
ENSMUSG00000036940	Kdm1a	0.217772	0.237727	0.0193217	0.887195	1.20016	1.22012	0.0199816	0.843087	0.0193217	0.887195	0.00100436	47.5084	translation_only	1462.24	1409.08	1630.64	1734.94	582.611	648.826	708.575	713.429	0.00100436
ENSMUSG00000039197	Adk	-0.204006	-0.188175	0.0154349	0.888613	0.405137	0.420968	0.0158589	0.806556	0.0154349	0.888613	0.000791621	-137.312	translation_only	6696.1	6506.07	5719.1	5807.1	4428.24	5389.44	4003.67	4459.76	0.000791621
ENSMUSG00000006205	Htra1	-0.203292	-0.214958	-0.0120149	0.897065	1.95682	1.94515	-0.0117663	0.863868	-0.0120149	0.897065	-0.000566812	-133.402	translation_only	5221.08	5368.21	4502.05	4562.9	1383.74	1298.03	1122.22	1192.09	-0.000566812
ENSMUSG00000041268	Dmxl2	-0.202466	-0.189989	0.0123049	0.909615	1.42421	1.43669	0.012431	0.851293	0.0123049	0.909615	0.000506253	-136.821	translation_only	8847.96	8142.72	7607.38	7229.76	3094.12	3142.1	2897.17	2484.97	0.000506253
ENSMUSG00000036309	Skp1a	-0.199755	-0.18677	0.0127901	0.910355	-0.968253	-0.955267	0.0129802	0.833566	0.0127901	0.910355	0.000521699	-136.924	translation_only	13015.5	12497.8	10648.3	11631.6	21455.4	27695.8	20551	21940.8	0.000521699
ENSMUSG00000026587	Astn1	-0.228578	-0.212935	0.015115	0.912279	1.5182	1.53384	0.0155117	0.840674	0.015115	0.912279	0.000602674	-137.029	translation_only	3703.5	3563.22	3193.47	3053.5	1084.06	1415.76	1084.1	1033.64	0.000602674
ENSMUSG00000073418	C4b	0.42134	0.474679	0.0522279	0.917962	1.74539	1.79873	0.0534882	0.612719	0.0522279	0.917962	0.00194159	48.4067	translation_only	1319.64	1200.21	1817.09	1682.9	479.43	261.623	503.928	482.809	0.00194159
ENSMUSG00000027408	Cpxm1	0.264419	0.28784	0.0217322	0.922043	1.23147	1.25489	0.0235333	0.875091	0.0217322	0.922043	0.000766037	47.4284	translation_only	647.048	529.962	715.311	723.719	291.799	204.44	282.226	310.673	0.000766037
ENSMUSG00000050296	Abca12	0.710075	0.666585	-0.0613209	0.813819	4.15427	4.11078	-0.0412094	0.924746	-0.0412094	0.924746	-0.0014002	43.1906	translation_only	59.5965	49.8788	84.7525	89.2257	1.64301	4.48497	1.67196	8.29569	-0.0014002
ENSMUSG00000024083	Pja2	-0.182285	-0.189118	-0.00706257	0.926036	0.889073	0.882241	-0.00687963	0.907166	-0.00706257	0.926036	-0.000235694	-133.946	translation_only	12419.5	12179.8	11024.6	10449.3	6469.85	6602.25	5834.79	5607.47	-0.000235694
ENSMUSG00000041278	Ttc1	-0.239122	-0.248673	-0.0103964	0.925917	0.258411	0.24886	-0.00963917	0.92864	-0.00963917	0.92864	-0.000309925	-133.878	translation_only	1468.63	1393.49	1135.68	1256.59	1096.22	1262.52	988.461	995.897	-0.000309925
ENSMUSG00000025092	Hspa12a	-0.224985	-0.194777	0.030225	0.933266	2.13051	2.16072	0.0301431	0.603633	0.030225	0.933266	0.000906581	-139.116	translation_only	11947	12360.6	10678.8	10436.9	2210.83	3251.98	1970.57	2669.55	0.000906581
ENSMUSG00000040372	Gpr63	0.507282	0.734337	0.197312	0.935563	2.63362	2.86068	0.233983	0.70838	0.197312	0.935563	0.0057076	55.3632	translation_only	19.156	31.1743	47.4614	34.6989	2.95742	4.85872	6.01904	4.97741	0.0057076
ENSMUSG00000040560	Wdr7	-0.190103	-0.196504	-0.00677732	0.93664	1.49874	1.49234	-0.00642624	0.92093	-0.00677732	0.93664	-0.000192659	-134.052	translation_only	6417.27	6225.5	5522.47	5457.64	1992.64	2413.29	1914.06	1920.45	-0.000192659
ENSMUSG00000021193	Pitrm1	0.219553	0.245005	0.0238915	0.945384	3.30526	3.33071	0.0254694	0.834474	0.0238915	0.945384	0.000582754	48.136	translation_only	919.49	938.345	1156.02	1038.49	82.1505	102.781	89.9513	124.02	0.000582754
ENSMUSG00000018293	Pfn1	0.172219	0.167508	-0.00485085	0.947216	-1.04492	-1.04963	-0.00477649	0.94247	-0.00485085	0.947216	-0.000114243	44.2056	translation_only	5487.14	5714.24	6156.42	6337.5	11835.9	10880.5	12238.4	13190.1	-0.000114243
ENSMUSG00000027698	Nceh1	0.185401	0.192813	0.00698219	0.950895	0.100184	0.107596	0.00742817	0.931265	0.00698219	0.950895	0.000152681	46.1227	translation_only	2486.03	2247.66	2674.79	2718.9	2170.75	2186.42	2529.67	2391.23	0.000152681
ENSMUSG00000015536	Mocs2	0.257561	0.270933	0.0120413	0.955902	0.538466	0.551838	0.0135055	0.915408	0.0120413	0.955902	0.000235849	46.4494	translation_only	827.966	785.591	993.299	949.262	455.114	640.977	556.093	744.953	0.000235849
ENSMUSG00000071661	Zbtb3	0.410701	0.497617	0.0771572	0.956789	3.04368	3.1306	0.0878501	0.796962	0.0771572	0.956789	0.00148016	50.4659	translation_only	95.7802	90.4053	155.945	109.054	12.1583	10.0912	12.0381	17.4209	0.00148016
ENSMUSG00000032349	Elovl5	-0.213144	-0.21627	-0.00352535	0.961998	-0.788332	-0.791457	-0.00320657	0.96431	-0.00320657	0.96431	-5.06107e-05	-134.583	translation_only	4261.15	4404.92	3674.87	3735.09	7152.68	7563.16	6520.96	6086.54	-5.06107e-05
ENSMUSG00000049739	Zfp646	0.331842	0.355805	0.018917	0.969534	1.61838	1.64234	0.0244103	0.920774	0.018917	0.969534	0.00025419	46.9958	translation_only	191.56	190.163	271.208	218.107	70.978	51.2034	72.5629	80.4681	0.00025419
ENSMUSG00000031565	Fgfr1	-0.219144	-0.214852	0.00384725	0.977298	-0.451623	-0.44733	0.00415029	0.957054	0.00384725	0.977298	3.83686e-05	-135.567	translation_only	3362.95	3444.76	3010.41	2827.96	4909.31	4242.78	3793	4018.84	3.83686e-05
ENSMUSG00000030138	Bms1	0.282706	0.292362	0.00769236	0.991993	2.4371	2.44675	0.0099061	0.95392	0.00769236	0.991993	2.6858e-05	45.9619	translation_only	468.259	526.845	698.361	518.005	87.4081	92.6894	103.996	113.651	2.6858e-05
ENSMUSG00000032023	Jhy	-0.372718	-0.361217	0.0090124	0.994395	3.23845	3.24995	0.0111968	0.944143	0.0090124	0.994395	2.20012e-05	-135.898	translation_only	612.993	617.25	467.834	483.306	59.1484	69.1433	44.1396	54.3367	2.20012e-05
ENSMUSG00000018042	Cyb5r3	0.227945	0.228173	0	0.988372	1.41926	1.41949	0.000280074	0.996145	0.000280074	0.996145	4.6975e-07	45.0287	translation_only	6728.02	6599.59	7617.55	7903.91	2736.6	2165.87	2971.74	2733.43	4.6975e-07
ENSMUSG00000023903	Mmp25	1.2471	0.104054	-1.14393	8.28905e-14	3.51551	2.37247	-1.14292	1.5806e-31	-1.14393	8.28905e-14	-14.9644	4.76957	transcription_only	1747.46	1686.53	1752.68	1913.39	142.613	153.237	304.965	392.801	-14.9644
ENSMUSG00000024665	Fads2	0.857053	-0.0929262	-0.95046	3.20581e-13	3.43815	2.48817	-0.949938	1.12799e-30	-0.95046	3.20581e-13	-11.8751	-6.18813	transcription_only	3365.08	3092.49	2908.71	3115.46	292.456	294.887	472.829	584.431	-11.8751
ENSMUSG00000031865	Dctn1	0.575702	-0.106261	-0.681941	2.8094e-12	4.03032	3.34836	-0.681903	1.05045e-35	-0.681941	2.8094e-12	-7.87736	-10.4578	transcription_only	14988.5	15010.4	13885.8	13827.5	953.603	852.145	1289.41	1384.96	-7.87736
ENSMUSG00000024127	Prepl	0.59431	-0.15908	-0.753582	2.94184e-11	4.11534	3.36195	-0.753498	5.8235e-40	-0.753582	2.94184e-11	-7.93626	-14.9851	transcription_only	12904.8	12569.5	11417.9	11279.6	701.565	745.253	931.28	1238.96	-7.93626
ENSMUSG00000019929	Dcn	-0.641325	0.0996849	0.740969	1.79107e-10	0.00204499	0.743055	0.740958	1.06823e-35	0.740969	1.79107e-10	7.22214	171.165	transcription_only	17146.8	18679.6	19147.3	19002.6	18425.7	16745.4	9466.28	12935.9	7.22214
ENSMUSG00000022551	Cyc1	0.621091	-0.0791598	-0.700713	5.82103e-10	0.968344	0.268093	-0.70039	1.64592e-15	-0.700713	5.82103e-10	-6.47109	-7.26335	transcription_only	3222.47	3422.93	2861.24	3368.27	1603.58	1734.56	2242.43	2857.45	-6.47109
ENSMUSG00000033287	Kctd17	0.608626	-0.199341	-0.808987	6.16895e-10	0.458089	-0.349877	-0.80811	2.20208e-11	-0.808987	6.16895e-10	-7.4506	-18.1349	transcription_only	1487.79	1377.9	1081.44	1390.43	1095.89	959.784	1419.16	1696.05	-7.4506
ENSMUSG00000030890	Ilk	0.744987	-0.125665	-0.871864	2.55482e-09	1.87501	1.00436	-0.870735	1.83153e-16	-0.871864	2.55482e-09	-7.49162	-9.57457	transcription_only	1489.91	1633.53	1366.21	1467.27	391.365	444.386	572.812	818.784	-7.49162
ENSMUSG00000041958	Pigs	0.54363	-0.146369	-0.69074	5.89009e-09	1.91212	1.22212	-0.690054	3.76022e-15	-0.69074	5.89009e-09	-5.6847	-15.0692	transcription_only	2462.61	2612.4	2203.56	2342.17	640.117	684.706	872.761	1045.67	-5.6847
ENSMUSG00000028439	Fam219a	0.526096	-0.14634	-0.673207	7.50477e-09	-0.634905	-1.30734	-0.672452	2.89699e-12	-0.673207	7.50477e-09	-5.46958	-15.5445	transcription_only	1890.06	1839.28	1634.03	1715.12	3222.27	2477.2	4195.94	3959.95	-5.46958
ENSMUSG00000005338	Cadm3	0.452939	-0.0223517	-0.475356	1.04173e-08	0.893414	0.418123	-0.475328	5.60594e-17	-0.475356	1.04173e-08	-3.79441	-2.82515	transcription_only	12630.2	12267.1	12031.5	12347.8	6758.69	6432.2	8696.85	9239.73	-3.79441
ENSMUSG00000040385	Ppp1ca	0.700003	0.0410506	-0.659352	1.46717e-08	0.80293	0.143978	-0.659002	3.06344e-17	-0.659352	1.46717e-08	-5.16505	3.35618	transcription_only	3458.73	3239.01	3379.93	3479.8	1984.1	1798.47	2557.42	3548.48	-5.16505
ENSMUSG00000026944	Abca2	0.460703	-0.14379	-0.604748	3.3248e-08	3.22461	2.62012	-0.604615	3.04413e-21	-0.604748	3.3248e-08	-4.52245	-17.3337	transcription_only	7266.52	7011.09	6475.09	6387.07	811.976	691.059	968.397	1087.56	-4.52245
ENSMUSG00000021493	Pdlim7	0.735549	0.103535	-0.632892	6.80328e-08	1.08708	0.455063	-0.63201	1.81571e-10	-0.632892	6.80328e-08	-4.53611	8.01227	transcription_only	1643.16	1546.24	1698.44	1715.12	755.456	724.323	1144.96	1303.25	-4.53611
ENSMUSG00000056569	Mpz	0.544278	0.112217	-0.43217	2.48816e-07	0.387669	-0.0443913	-0.43205	1.96496e-15	-0.43217	2.48816e-07	-2.8541	11.6498	transcription_only	50169.6	47450.3	50858.3	54070.8	34238	39206.1	52208.8	54151.7	-2.8541
ENSMUSG00000007891	Ctsd	0.577722	0.0848251	-0.493119	3.63077e-07	-0.98907	-1.48197	-0.49296	5.40968e-14	-0.493119	3.63077e-07	-3.17569	8.35288	transcription_only	5968.17	5804.65	6095.4	6320.15	12530.9	10466.4	15857.5	18245.5	-3.17569
ENSMUSG00000030695	Aldoa	0.288308	-0.158943	-0.447248	6.4347e-07	1.04728	0.60003	-0.447273	6.20128e-16	-0.447248	6.4347e-07	-2.76912	-28.8678	transcription_only	29466.2	30862.5	26049.5	27655	15373	13335.7	16329.3	18502.7	-2.76912
ENSMUSG00000031169	Porcn	0.660207	-0.105865	-0.767632	8.66266e-07	1.09239	0.326319	-0.766096	9.12098e-08	-0.767632	8.66266e-07	-4.65365	-9.10987	transcription_only	723.672	801.178	644.119	753.461	314.472	387.203	551.411	549.174	-4.65365
ENSMUSG00000051851	Cxx1c	0.536912	-0.11012	-0.647778	8.96892e-07	1.99156	1.34453	-0.647195	1.00402e-10	-0.647778	8.96892e-07	-3.91728	-11.5906	transcription_only	1779.38	1998.27	1671.32	1791.95	463.329	468.306	601.57	741.634	-3.91728
ENSMUSG00000114278	AC157931.1	1.35623	0.12104	-1.23887	1.02187e-06	2.13282	0.897632	-1.23531	1.12173e-07	-1.23887	1.02187e-06	-7.42156	5.10001	transcription_only	217.102	324.212	281.378	294.94	68.6778	50.8297	153.82	150.567	-7.42156
ENSMUSG00000078235	Fam43b	0.636092	-0.227257	-0.8644	1.31606e-06	3.45132	2.58797	-0.863499	5.8436e-12	-0.8644	1.31606e-06	-5.0833	-19.6603	transcription_only	1385.62	1755.11	1196.71	1447.44	144.585	136.418	195.285	238.916	-5.0833
ENSMUSG00000025153	Fasn	0.557	0.122752	-0.434313	1.335e-06	3.71291	3.27866	-0.434263	5.97701e-14	-0.434313	1.335e-06	-2.55138	12.4282	transcription_only	22942.5	24842.8	26198.7	25518.5	1854.96	1728.21	2566.45	2670.8	-2.55138
ENSMUSG00000024392	Bag6	0.538287	0.0129041	-0.525742	1.81602e-06	3.08595	2.56057	-0.525447	7.46936e-16	-0.525742	1.81602e-06	-3.01822	1.37326	transcription_only	5940.5	6041.57	5936.06	6077.26	757.756	629.391	994.145	1007.93	-3.01822
ENSMUSG00000040128	Pnrc1	-0.595977	0.00157161	0.596872	1.84872e-06	0.307871	0.90542	0.597616	3.48944e-08	0.596872	1.84872e-06	3.42194	179.849	transcription_only	1466.5	1655.35	1444.18	1643.24	1182.31	1290.92	831.631	793.067	3.42194
ENSMUSG00000003344	Btbd2	0.474575	-0.161094	-0.636306	2.08008e-06	1.58965	0.953982	-0.635787	1.95672e-11	-0.636306	2.08008e-06	-3.61544	-18.7498	transcription_only	2239.13	2175.96	1827.26	2089.37	828.077	615.189	907.204	1086.73	-3.61544
ENSMUSG00000020523	Fam114a2	-0.556822	0.0897523	0.645608	7.66398e-07	-1.66035	-1.01378	0.646642	2.3734e-06	0.646642	2.3734e-06	3.63712	170.843	transcription_only	734.315	720.125	752.602	785.682	2252.24	2274.25	1588.36	1467.51	3.63712
ENSMUSG00000037916	Ndufv1	0.42303	-0.0716745	-0.495044	2.6213e-06	0.701902	0.207197	-0.494819	3.65375e-11	-0.495044	2.6213e-06	-2.76308	-9.61637	transcription_only	3933.37	4102.53	3691.82	3896.19	2645.9	2208.1	3002.5	3464.69	-2.76308
ENSMUSG00000022003	Slc25a30	0.988068	-0.198346	-1.19089	2.97965e-06	2.5505	1.36409	-1.18667	8.90196e-09	-1.19089	2.97965e-06	-6.58068	-11.3508	transcription_only	317.139	358.504	301.719	282.548	63.0916	49.7084	111.352	111.162	-6.58068
ENSMUSG00000022565	Plec	0.420165	0.0158394	-0.404314	3.94573e-06	2.78942	2.3851	-0.40433	1.45086e-13	-0.404314	3.94573e-06	-2.18486	2.15892	transcription_only	31271.2	31595.1	32609.4	30604.4	4722.67	4221.85	6169.18	5720.7	-2.18486
ENSMUSG00000061451	Tmem151a	0.395677	-0.109691	-0.505875	4.48453e-06	0.0222537	-0.483115	-0.505383	1.27497e-07	-0.505875	4.48453e-06	-2.70556	-15.4947	transcription_only	2283.82	2559.41	2074.74	2364.48	2340.3	2339.29	2785.15	3330.72	-2.70556
ENSMUSG00000003033	Ap1m1	0.538956	0.0469259	-0.492562	4.57069e-06	1.54413	1.05209	-0.492095	7.39419e-10	-0.492562	4.57069e-06	-2.63029	4.97608	transcription_only	2875.53	2945.97	2976.51	2998.97	1031.48	930.632	1349.6	1483.27	-2.63029
ENSMUSG00000024777	Ppp2r5b	0.562391	0.0791811	-0.483831	4.59966e-06	-0.245155	-0.728365	-0.483176	4.09813e-09	-0.483831	4.59966e-06	-2.58234	8.0142	transcription_only	2626.5	2705.93	2766.32	2827.96	3435.21	2775.08	4486.86	4626.09	-2.58234
ENSMUSG00000036622	Atp13a2	0.572902	0.0959539	-0.477348	4.61554e-06	0.972501	0.495553	-0.476915	2.00104e-09	-0.477348	4.61554e-06	-2.54702	9.50807	transcription_only	3169.26	3363.7	3339.25	3583.9	1695.26	1574.97	2231.06	2602.36	-2.54702
ENSMUSG00000062184	Hs6st2	-0.745448	-0.201182	0.543566	5.55773e-06	-0.430121	0.114145	0.544273	3.23928e-08	0.543566	5.55773e-06	2.85649	-164.897	transcription_only	1828.34	1976.45	1593.35	1685.37	2330.77	2702.94	1403.77	1578.25	2.85649
ENSMUSG00000041607	Mbp	0.424305	-0.00632206	-0.430677	5.78772e-06	-0.144821	-0.575448	-0.430607	3.42634e-10	-0.430677	5.78772e-06	-2.25567	-0.853632	transcription_only	10929.6	9645.32	9943.16	10444.4	10807.1	11605.2	13583	16288.2	-2.25567
ENSMUSG00000025432	Avil	0.434523	-0.0411223	-0.475679	5.91561e-06	4.24943	3.77378	-0.475596	4.22967e-19	-0.475679	5.91561e-06	-2.48685	-5.40624	transcription_only	24432.5	25391.4	23700.2	24430.5	1218.78	1358.57	1526.16	1933.72	-2.48685
ENSMUSG00000035864	Syt1	-0.486674	-0.0386341	0.447629	6.16189e-06	-0.391527	0.0565123	0.447951	1.64735e-09	0.447629	6.16189e-06	2.33228	-175.461	transcription_only	3722.66	3753.38	3607.07	3628.51	4542.59	5106.14	3396.41	3441.88	2.33228
ENSMUSG00000021819	Zswim8	0.493402	-0.0235987	-0.517474	6.18027e-06	2.11808	1.60108	-0.516975	8.3744e-10	-0.517474	6.18027e-06	-2.69552	-2.73828	transcription_only	2694.62	2908.56	2783.27	2691.64	658.19	608.835	852.029	920.406	-2.69552
ENSMUSG00000030284	Creld1	0.447467	-0.0420623	-0.490113	6.73372e-06	-0.364509	-0.854038	-0.48949	1.46865e-08	-0.490113	6.73372e-06	-2.53474	-5.37008	transcription_only	2454.1	2590.58	2362.9	2495.84	3552.85	2824.78	4330.7	4311.27	-2.53474
ENSMUSG00000035513	Ntng2	0.417432	-0.203923	-0.622561	7.24132e-06	1.60668	0.985324	-0.621555	1.77209e-08	-0.622561	7.24132e-06	-3.20008	-26.0364	transcription_only	1336.67	1321.79	1145.85	1150.02	463.986	394.677	541.045	598.948	-3.20008
ENSMUSG00000039952	Dag1	0.321506	-0.0744543	-0.396191	7.57334e-06	1.29668	0.900715	-0.396049	3.54778e-10	-0.396191	7.57334e-06	-2.02878	-13.0387	transcription_only	7123.92	6992.39	6719.18	6620.05	2873.3	2781.8	3430.52	3589.54	-2.02878
ENSMUSG00000030683	Sez6l2	0.525597	0.123326	-0.402421	7.85872e-06	2.38637	1.9841	-0.40221	1.70164e-11	-0.402421	7.85872e-06	-2.05422	13.205	transcription_only	9141.68	9492.56	9936.38	10228.7	1769.85	1734.56	2431.02	2580.37	-2.05422
ENSMUSG00000032131	Abcg4	0.385737	-0.220465	-0.607345	7.96784e-06	1.17747	0.57127	-0.606354	5.8155e-07	-0.607345	7.96784e-06	-3.09665	-29.7498	transcription_only	1247.27	1253.21	949.228	1172.33	523.792	563.985	666.776	744.953	-3.09665
ENSMUSG00000022175	Lrp10	0.468241	-0.0503605	-0.518987	8.61668e-06	1.68294	1.16434	-0.518723	2.73587e-10	-0.518987	8.61668e-06	-2.62849	-6.13871	transcription_only	2930.87	2998.96	2729.03	2951.88	956.561	858.872	1118.2	1377.91	-2.62849
ENSMUSG00000036026	Tmem63b	0.329235	-0.145937	-0.475601	9.08604e-06	0.970848	0.495676	-0.475262	8.50229e-10	-0.475601	9.08604e-06	-2.3978	-23.9059	transcription_only	4052.57	3825.08	3396.88	3680.56	2189.8	1767.83	2524.99	2415.7	-2.3978
ENSMUSG00000031708	Tecr	0.35617	-0.0683452	-0.424689	9.52169e-06	0.25385	-0.170665	-0.424607	1.54959e-10	-0.424689	9.52169e-06	-2.13249	-10.8624	transcription_only	9220.44	9458.27	8356.6	9331.52	7597.94	7810.58	8799.51	10791.4	-2.13249
ENSMUSG00000038872	Zfhx3	-0.587386	-0.121622	0.46509	9.54387e-06	-1.312	-0.846232	0.465583	1.06337e-06	0.46509	9.54387e-06	2.33488	-168.302	transcription_only	1994.36	1901.63	1834.04	1737.42	4767.69	4762.67	3236.24	3063.6	2.33488
ENSMUSG00000024425	Ndfip1	0.338795	-0.0530271	-0.391937	1.48026e-05	0.869898	0.478076	-0.391786	8.54124e-11	-0.391937	1.48026e-05	-1.89292	-8.8956	transcription_only	12030	11949.1	11021.2	11946.3	6232.92	6679.24	7507.08	8712.13	-1.89292
ENSMUSG00000071657	Bscl2	0.354638	-0.149829	-0.505147	1.50262e-05	0.883918	0.379452	-0.50445	9.82452e-08	-0.505147	1.50262e-05	-2.4364	-22.9032	transcription_only	1975.2	1901.63	1739.12	1739.9	1082.09	986.694	1216.85	1411.93	-2.4364
ENSMUSG00000028246	Faxc	0.81617	0.0346624	-0.783522	1.51952e-05	2.34874	1.56723	-0.781648	5.04227e-08	-0.783522	1.51952e-05	-3.77524	2.43187	transcription_only	687.489	692.069	745.822	664.236	127.826	138.66	223.373	242.649	-3.77524
ENSMUSG00000032076	Cadm1	-0.520838	-0.139772	0.380852	1.65342e-05	-0.945134	-0.564068	0.381008	5.15802e-10	0.380852	1.65342e-05	1.82109	-164.978	transcription_only	7994.45	8052.31	7234.47	7247.11	14689.2	15708.2	10272.5	10769	1.82109
ENSMUSG00000002032	Tmem25	0.359865	-0.124809	-0.485268	1.90594e-05	0.982752	0.498078	-0.484808	1.13208e-07	-0.485268	1.90594e-05	-2.29041	-19.1277	transcription_only	2624.38	2540.7	2173.05	2525.58	1276.62	1296.9	1488.04	1793.11	-2.29041
ENSMUSG00000022708	Zbtb20	-0.535586	-0.0655921	0.469165	2.20204e-05	-2.02864	-1.55865	0.469966	1.80544e-05	0.469165	2.20204e-05	2.18498	-173.018	transcription_only	1300.48	1315.55	1271.29	1216.94	5281.95	5215.27	3542.54	3650.93	2.18498
ENSMUSG00000041638	Gcn1l1	0.730355	0.00892456	-0.722194	2.42091e-05	4.07142	3.34999	-0.721523	5.05927e-16	-0.722194	2.42091e-05	-3.33366	0.70009	transcription_only	2215.71	2285.07	2312.05	2193.46	148.857	113.993	222.036	211.54	-3.33366
ENSMUSG00000028964	Park7	0.344695	-0.137304	-0.482381	2.69478e-05	1.08395	0.601946	-0.482053	3.31894e-08	-0.482381	2.69478e-05	-2.20423	-21.7191	transcription_only	3324.64	2889.85	2756.15	2875.05	1607.85	1283.82	1762.24	1887.27	-2.20423
ENSMUSG00000039183	Nubp2	0.605222	-0.129362	-0.736807	2.6961e-05	0.819889	0.0853052	-0.73466	5.96017e-07	-0.736807	2.6961e-05	-3.36667	-12.065	transcription_only	672.59	692.069	583.097	651.843	327.945	432.426	470.154	678.587	-3.36667
ENSMUSG00000025969	Nrp2	-0.42775	0.0350921	0.462316	2.86212e-05	-0.0682729	0.394569	0.462814	7.30573e-07	0.462316	2.86212e-05	2.10044	175.31	transcription_only	1987.97	1864.22	1973.04	1960.49	2032.73	1948.35	1507.44	1432.25	2.10044
ENSMUSG00000036752	Tubb4b	0.297806	-0.135219	-0.433213	3.17518e-05	2.24443	1.8114	-0.433122	1.07009e-12	-0.433213	3.17518e-05	-1.94869	-24.4205	transcription_only	9043.78	8934.54	7953.17	8317.82	1797.45	1936.76	2007.69	2552.17	-1.94869
ENSMUSG00000055447	Cd47	-0.430997	-0.0439499	0.38674	3.2569e-05	-1.90949	-1.52244	0.386917	9.56901e-07	0.38674	3.2569e-05	1.73538	-174.178	transcription_only	3733.3	3429.17	3532.48	3395.53	13141.1	13385	9840.8	9701.8	1.73538
ENSMUSG00000026399	Cd55	-0.713223	-0.184147	0.528554	3.36654e-05	0.168762	0.697837	0.528915	1.36099e-11	0.528554	3.36654e-05	2.36412	-165.523	transcription_only	3518.32	3385.52	2973.12	3070.85	2545.68	3506.13	1713.76	1951.15	2.36412
ENSMUSG00000068328	Aup1	0.659161	0.00596543	-0.654685	3.37254e-05	0.725805	0.0726101	-0.653182	5.94725e-06	-0.654685	3.37254e-05	-2.92778	0.518515	transcription_only	674.718	670.247	640.729	698.934	450.185	349.454	602.239	653.285	-2.92778
ENSMUSG00000021091	Serpina3n	0.610521	0.0399978	-0.571018	3.5235e-05	2.82973	2.25921	-0.570471	3.09452e-14	-0.571018	3.5235e-05	-2.54276	3.74833	transcription_only	4246.25	3971.6	4061.34	4342.32	470.558	669.382	751.043	976.817	-2.54276
ENSMUSG00000043991	Pura	-0.603165	-0.13759	0.464923	3.68717e-05	0.312266	0.777842	0.465547	4.87224e-07	0.464923	3.68717e-05	2.06115	-167.15	transcription_only	2058.21	2063.74	1820.48	1901	1614.42	1651.59	1045.64	1090.05	2.06115
ENSMUSG00000030082	Sec61a1	0.49853	0.0683358	-0.430606	3.8261e-05	1.2949	0.864703	-0.430241	6.11241e-08	-0.430606	3.8261e-05	-1.90209	7.80516	transcription_only	3188.42	3373.05	3518.92	3321.18	1390.64	1235.98	1773.95	1913.4	-1.90209
ENSMUSG00000021025	Nfkbia	-0.45195	0.146503	0.597168	3.88005e-05	-1.21215	-0.613702	0.598483	2.66059e-05	0.597168	3.88005e-05	2.6342	162.039	transcription_only	666.204	639.072	728.871	711.327	1641.37	1337.27	1105.16	1058.53	2.6342
ENSMUSG00000024759	Atl3	0.277798	-0.144634	-0.422778	4.06703e-05	1.14777	0.725342	-0.422528	1.02228e-07	-0.422778	4.06703e-05	-1.8563	-27.5036	transcription_only	3133.08	3179.77	2830.73	2845.31	1377.17	1425.1	1774.61	1598.99	-1.8563
ENSMUSG00000038276	Asic3	0.294864	-0.188576	-0.484027	4.37659e-05	2.13409	1.65065	-0.483453	8.78504e-09	-0.484027	4.37659e-05	-2.10981	-32.6004	transcription_only	2984.08	2942.85	2457.82	2704.03	673.963	654.806	744.689	875.195	-2.10981
ENSMUSG00000041263	Rusc1	0.26873	-0.129406	-0.398594	4.64467e-05	-0.307229	-0.705364	-0.39813	8.44467e-06	-0.398594	4.64467e-05	-1.72713	-25.713	transcription_only	3399.13	3740.91	2959.56	3502.11	4265.58	4412.09	5115.85	5267.76	-1.72713
ENSMUSG00000063524	Eno1	0.672862	0.17615	-0.497524	4.79315e-05	1.62436	1.12765	-0.496646	1.29705e-07	-0.497524	4.79315e-05	-2.14899	14.6703	transcription_only	1753.84	1761.35	1932.36	2012.53	557.638	563.985	811.902	964.788	-2.14899
ENSMUSG00000037815	Ctnna1	-0.324454	0.0755904	0.399887	4.79679e-05	1.16596	1.566	0.400049	6.19738e-09	0.399887	4.79679e-05	1.72713	166.885	transcription_only	6010.74	5736.06	6376.78	5955.81	2535.16	2620.34	2117.7	1971.05	1.72713
ENSMUSG00000032295	Man2c1	0.540003	-0.0449885	-0.586251	4.92082e-05	1.92675	1.34176	-0.585117	2.3148e-07	-0.586251	4.92082e-05	-2.52555	-4.76241	transcription_only	1230.24	1165.92	1142.46	1169.85	328.273	292.644	427.018	470.365	-2.52555
ENSMUSG00000029544	Cabp1	0.405861	-0.158756	-0.565502	4.94245e-05	0.365388	-0.199229	-0.564591	1.36399e-07	-0.565502	4.94245e-05	-2.43508	-21.3634	transcription_only	1760.23	1864.22	1444.18	1764.69	1663.38	1098.44	1815.74	1821.73	-2.43508
ENSMUSG00000028399	Ptprd	-0.570421	0.0222182	0.591396	5.25881e-05	-1.25161	-0.658968	0.592486	2.17584e-05	0.591396	5.25881e-05	2.53065	177.769	transcription_only	793.911	695.186	766.163	746.026	1527.34	1979.37	1175.05	1169.28	2.53065
ENSMUSG00000052738	Suclg1	0.43007	-0.162903	-0.593415	5.38394e-05	2.3935	1.80052	-0.593038	2.50368e-12	-0.593415	5.38394e-05	-2.53323	-20.7458	transcription_only	2933	2780.74	2440.87	2632.16	472.858	599.117	573.481	861.092	-2.53323
ENSMUSG00000000958	Slc7a7	0.505581	-0.016194	-0.522567	6.05308e-05	0.887466	0.365691	-0.521816	6.57499e-07	-0.522567	6.05308e-05	-2.2042	-1.83458	transcription_only	1566.54	1836.16	1684.88	1648.2	804.746	997.906	1143.95	1397.41	-2.2042
ENSMUSG00000027603	Ggt7	0.496227	0.0991359	-0.397395	7.22162e-05	1.12661	0.729521	-0.397061	2.94739e-07	-0.397395	7.22162e-05	-1.64576	11.2978	transcription_only	4307.98	4464.15	4356.28	4961.94	2028.13	1921.44	2594.88	2939.99	-1.64576
ENSMUSG00000028447	Dctn3	0.307111	-0.132938	-0.440547	7.32113e-05	0.870509	0.43046	-0.439985	5.56975e-07	-0.440547	7.32113e-05	-1.82185	-23.4062	transcription_only	2822.32	3217.18	2654.45	2800.69	1698.87	1540.96	1823.77	2159.37	-1.82185
ENSMUSG00000026750	Psmb7	0.522124	0.0351127	-0.487533	8.43618e-05	1.10644	0.619425	-0.486948	1.32415e-10	-0.487533	8.43618e-05	-1.98614	3.84734	transcription_only	3603.46	3550.75	3535.87	3747.48	1458.99	1812.68	1939.47	2726.38	-1.98614
ENSMUSG00000045216	Hs6st1	0.34141	-0.169477	-0.511939	9.80231e-05	-0.100332	-0.611218	-0.510921	7.42722e-05	-0.511939	9.80231e-05	-2.05219	-26.4	transcription_only	936.517	922.758	779.723	860.036	995.664	966.138	1161.01	1308.64	-2.05219
ENSMUSG00000024953	Prdx5	0.229281	-0.135587	-0.365172	9.82034e-05	-0.726528	-1.0914	-0.364912	2.42077e-06	-0.365172	9.82034e-05	-1.46356	-30.5983	transcription_only	3611.98	3444.76	3149.4	3241.87	5882.3	5618.17	6414.96	6977.5	-1.46356
ENSMUSG00000033955	Tnks1bp1	0.563294	0.112172	-0.451626	9.95915e-05	1.96901	1.51789	-0.45117	1.21317e-07	-0.451626	9.95915e-05	-1.80731	11.2623	transcription_only	2447.72	2422.24	2695.13	2547.89	649.646	574.076	913.557	883.076	-1.80731
ENSMUSG00000039706	Ldb2	-0.647508	-0.156398	0.490092	0.000102203	-1.06703	-0.575924	0.49096	1.21525e-05	0.490092	0.000102203	1.95573	-166.421	transcription_only	1349.44	1384.14	1298.41	1147.54	2771.43	2859.17	1969.23	1599.82	1.95573
ENSMUSG00000001119	Col6a1	0.447263	0.00105105	-0.446619	0.000104474	2.16402	1.71781	-0.446142	2.22698e-07	-0.446619	0.000104474	-1.77799	0.134643	transcription_only	3030.91	3036.37	3230.76	2823	649.646	682.463	854.37	949.856	-1.77799
ENSMUSG00000030588	Yif1b	0.525325	-0.0218377	-0.548265	0.000104748	1.40665	0.859483	-0.547343	6.28122e-07	-0.548265	0.000104748	-2.18201	-2.38041	transcription_only	1296.22	1265.67	1288.24	1226.85	503.747	447.376	595.216	765.692	-2.18201
ENSMUSG00000024187	Fam234a	0.489986	-0.0727975	-0.563961	0.000110495	0.8289	0.266117	-0.562986	8.37618e-06	-0.563961	0.000110495	-2.2314	-8.45064	transcription_only	940.774	935.228	847.525	921.999	580.311	458.215	688.512	761.544	-2.2314
ENSMUSG00000025858	Get4	0.685525	0.0459535	-0.641138	0.000114631	1.11739	0.477815	-0.63948	3.40213e-06	-0.641138	0.000114631	-2.52653	3.83503	transcription_only	725.801	735.712	728.871	768.332	387.75	273.957	493.562	564.936	-2.52653
ENSMUSG00000017754	Pltp	0.790776	0.184961	-0.606741	0.000115237	2.11752	1.51171	-0.605732	2.93049e-08	-0.606741	0.000115237	-2.38959	13.1647	transcription_only	1183.42	1218.91	1332.31	1378.04	315.129	228.36	426.349	508.94	-2.38959
ENSMUSG00000005142	Man2b1	0.612565	-0.0141484	-0.627445	0.000116852	3.14002	2.51331	-0.626797	1.12186e-10	-0.627445	0.000116852	-2.46734	-1.32312	transcription_only	1709.14	1717.7	1691.66	1682.9	208.334	173.793	255.141	326.02	-2.46734
ENSMUSG00000003072	Atp5d	0.494497	0.0717383	-0.422892	0.000121376	1.33409	0.911337	-0.422799	9.99727e-10	-0.422892	0.000121376	-1.65599	8.25451	transcription_only	6104.39	6063.39	6027.6	6672.1	2710.97	2035.43	3182.4	3463.45	-1.65599
ENSMUSG00000071658	Gng3	0.3985	0.0383154	-0.360436	0.000121617	-0.881768	-1.24195	-0.360122	6.55615e-06	-0.360436	0.000121617	-1.41111	5.49204	transcription_only	4050.44	4183.59	3895.22	4488.55	7613.05	7304.15	9347.24	10185.4	-1.41111
ENSMUSG00000026198	Abcb6	0.783038	0.0479066	-0.736855	0.000121906	2.59973	1.8646	-0.735147	5.24327e-07	-0.736855	0.000121906	-2.88403	3.50101	transcription_only	691.746	860.41	725.481	852.601	126.84	123.337	188.262	239.745	-2.88403
ENSMUSG00000001123	Lgals9	0.306491	-0.204761	-0.511992	0.00012445	2.07103	1.55977	-0.511342	2.71272e-07	-0.511992	0.00012445	-1.99933	-33.7461	transcription_only	2024.15	2356.77	1817.09	1943.14	492.246	529.974	562.112	693.934	-1.99933
ENSMUSG00000032294	Pkm	0.264368	-0.0542486	-0.318672	0.000125228	0.00453258	-0.314084	-0.318638	5.64541e-08	-0.318672	0.000125228	-1.24355	-11.5962	transcription_only	11123.3	11409.8	10529.6	11031.8	11046.3	11046.9	12708.2	13650.1	-1.24355
ENSMUSG00000024921	Smarca2	-0.560798	-0.112848	0.447458	0.000127786	0.736618	1.18457	0.447836	8.41241e-08	0.447458	0.000127786	1.74218	-168.622	transcription_only	3269.3	3089.37	3071.43	2795.74	1813.23	1946.85	1383.38	1147.29	1.74218
ENSMUSG00000018171	Vmp1	0.385948	-0.126377	-0.513202	0.000133209	0.419194	-0.0931311	-0.512329	4.28612e-06	-0.513202	0.000133209	-1.9889	-18.1308	transcription_only	1489.91	1449.6	1457.74	1234.29	941.773	1224.02	1277.37	1532.63	-1.9889
ENSMUSG00000029198	Grpel1	0.529792	-0.139004	-0.670013	0.000136133	2.13925	1.47046	-0.669064	7.5046e-09	-0.670013	0.000136133	-2.5903	-14.7016	transcription_only	1187.67	1156.56	1027.2	1088.06	216.22	308.342	310.65	441.33	-2.5903
ENSMUSG00000032590	Apeh	0.342167	-0.224935	-0.568543	0.000144609	1.70447	1.13737	-0.567367	1.75924e-06	-0.568543	0.000144609	-2.18309	-33.3202	transcription_only	1115.31	1190.86	959.398	996.353	361.462	333.009	396.922	478.246	-2.18309
ENSMUSG00000028757	Ddost	0.355463	-0.0536923	-0.409587	0.000150203	0.903553	0.494398	-0.409176	1.62744e-06	-0.409587	0.000150203	-1.56598	-8.58953	transcription_only	2662.69	2624.87	2420.53	2637.11	1406.09	1375.76	1633.5	1902.62	-1.56598
ENSMUSG00000050822	Slc29a4	0.588566	-0.0396477	-0.629755	0.000162352	0.970294	0.34208	-0.628273	3.8666e-05	-0.629755	0.000162352	-2.38648	-3.8538	transcription_only	606.608	673.364	566.147	661.757	341.089	298.998	427.352	529.679	-2.38648
ENSMUSG00000020777	Acox1	0.352419	-0.0228484	-0.375511	0.000162354	1.24053	0.865259	-0.375338	1.8077e-07	-0.375511	0.000162354	-1.42301	-3.70947	transcription_only	4165.37	4283.34	4146.09	4119.25	1645.31	1871.35	2152.81	2305.79	-1.42301
ENSMUSG00000004788	Eif2b2	0.658129	0.00955285	-0.650259	0.000174327	1.50973	0.861154	-0.648742	1.27786e-06	-0.650259	0.000174327	-2.44409	0.831599	transcription_only	793.911	844.822	861.085	780.725	275.369	289.654	350.776	535.486	-2.44409
ENSMUSG00000048027	Rgmb	0.490523	0.0881124	-0.402747	0.000186118	1.14837	0.745955	-0.402421	1.77987e-06	-0.402747	0.000186118	-1.50233	10.1834	transcription_only	2758.47	3086.25	3088.38	3073.33	1392.29	1193.75	1799.69	1810.53	-1.50233
ENSMUSG00000038949	Cnst	0.400909	0.0147174	-0.386762	0.000201359	-0.28274	-0.668931	-0.386124	1.33642e-05	-0.386762	0.000201359	-1.42948	2.1024	transcription_only	2285.95	2344.3	2413.75	2243.03	2564.08	2975.4	3692.35	3570.05	-1.42948
ENSMUSG00000037236	Matr3	-0.328413	0.04662	0.37458	0.000201801	0.0916037	0.466637	0.375096	1.66679e-07	0.37458	0.000201801	1.3841	171.921	transcription_only	4180.27	4130.59	4318.99	4223.35	3574.53	4103.37	3111.85	2959.9	1.3841
ENSMUSG00000049336	Tenm2	-0.454601	0.0454825	0.499353	0.000204513	0.849234	1.34932	0.500106	1.02226e-06	0.499353	0.000204513	1.84225	174.287	transcription_only	1521.84	1455.84	1542.5	1519.31	753.484	875.691	561.443	619.273	1.84225
ENSMUSG00000043445	Pgp	0.390366	-0.142159	-0.533431	0.0002281	1.25624	0.723713	-0.5326	3.39322e-06	-0.533431	0.0002281	-1.94269	-20.01	transcription_only	1628.26	1904.75	1413.67	1744.86	835.635	613.32	856.376	1031.98	-1.94269
ENSMUSG00000024436	Mrps18b	0.867335	-0.161026	-1.03378	0.000228441	2.08552	1.05716	-1.02864	2.16314e-05	-1.03378	0.000228441	-3.76423	-10.5176	transcription_only	238.386	243.159	186.455	237.935	49.6189	62.0421	90.2856	111.992	-3.76423
ENSMUSG00000002228	Ppm1j	0.274134	-0.134791	-0.409556	0.000230408	-0.0194707	-0.428395	-0.40912	6.61713e-05	-0.409556	0.000230408	-1.48976	-26.1832	transcription_only	1668.7	1552.48	1434.01	1487.09	1666.67	1552.17	1939.8	1927.09	-1.48976
ENSMUSG00000007029	Vars	0.670098	0.0987389	-0.571831	0.000231063	2.87954	2.30818	-0.571413	8.9881e-10	-0.571831	0.000231063	-2.07933	8.38221	transcription_only	1973.07	2200.9	2166.27	2260.38	330.245	225.37	418.992	460.411	-2.07933
ENSMUSG00000025651	Uqcrc1	0.214559	-0.128957	-0.343663	0.000235761	1.63848	1.29496	-0.343507	3.25812e-08	-0.343663	0.000235761	-1.24665	-31.0072	transcription_only	8017.86	8201.95	7220.91	7514.78	2605.16	2518.31	2761.74	3144.48	-1.24665
ENSMUSG00000029223	Uchl1	0.337335	0.0129501	-0.324426	0.000237032	0.0145963	-0.309788	-0.324422	5.82091e-09	-0.324426	0.000237032	-1.17611	2.19847	transcription_only	60743.8	63498.8	59764.1	64869.5	65126	55847.6	72995.9	78851.7	-1.17611
ENSMUSG00000033124	Atg9a	0.28806	-0.158969	-0.44781	0.000261467	0.684907	0.237878	-0.447117	2.82913e-07	-0.44781	0.000261467	-1.60432	-28.8926	transcription_only	2462.61	2472.12	2135.76	2252.95	1745.53	1272.24	1878.94	1783.16	-1.60432
ENSMUSG00000004044	Cavin1	-0.290836	0.148437	0.438712	0.000263638	-0.849741	-0.410468	0.439165	7.10148e-08	0.438712	0.000263638	1.57015	152.961	transcription_only	2730.8	2924.15	3132.45	3090.68	5736.08	4267.08	4199.62	3925.93	1.57015
ENSMUSG00000041037	Irgq	0.483193	0.074535	-0.408981	0.000269168	0.744852	0.336194	-0.408557	5.46269e-05	-0.408981	0.000269168	-1.46005	8.76905	transcription_only	2264.67	2724.63	2406.97	2785.82	1467.87	1450.51	1903.36	2149.41	-1.46005
ENSMUSG00000071074	Yipf3	0.443123	-0.007808	-0.451599	0.000280679	0.662114	0.211183	-0.450968	9.11462e-06	-0.451599	0.000280679	-1.60399	-1.00947	transcription_only	1570.79	1596.12	1495.03	1628.37	1056.46	910.823	1207.82	1450.5	-1.60399
ENSMUSG00000024892	Pcx	0.379086	-0.134334	-0.513989	0.000287901	2.50327	1.98985	-0.513543	8.04826e-08	-0.513989	0.000287901	-1.81991	-19.5124	transcription_only	1964.56	2185.32	1891.68	1858.87	392.022	325.534	426.014	501.889	-1.81991
ENSMUSG00000028755	Cda	0.560429	0.0252797	-0.536414	0.000291778	0.585969	0.0508195	-0.535345	5.98594e-05	-0.536414	0.000291778	-1.8962	2.58273	transcription_only	789.654	869.762	796.673	872.429	555.666	528.105	692.19	896.349	-1.8962
ENSMUSG00000028222	Calb1	-0.634052	-0.0718495	0.560747	0.000302075	-0.314137	0.248065	0.562172	0.000118516	0.560747	0.000302075	1.97376	-173.535	transcription_only	672.59	667.129	613.608	651.843	751.513	888.398	501.921	547.515	1.97376
ENSMUSG00000057098	Ebf1	-0.480684	-0.0817981	0.398189	0.000307401	-2.12283	-1.72395	0.398709	6.71973e-05	0.398189	0.000307401	1.39856	-170.342	transcription_only	1843.24	1661.59	1661.15	1643.24	6960.78	8108.08	5346.25	5377.26	1.39856
ENSMUSG00000031010	Usp9x	0.661621	-0.0123524	-0.674278	0.000310769	6.99021	6.31624	-0.674073	1.97077e-21	-0.674278	0.000310769	-2.36507	-1.06958	transcription_only	14384.1	12903	14197.7	12741.9	92.3372	119.225	144.457	187.897	-2.36507
ENSMUSG00000007721	Ccdc124	0.439384	-0.130088	-0.57071	0.000312097	2.18375	1.61428	-0.569602	1.82481e-07	-0.57071	0.000312097	-2.00074	-16.4924	transcription_only	1468.63	1346.73	1234	1325.99	338.789	272.088	356.461	467.462	-2.00074
ENSMUSG00000038555	Reep2	0.504711	0.105019	-0.400116	0.00031753	1.00917	0.609474	-0.399724	8.88241e-07	-0.400116	0.00031753	-1.39969	11.7542	transcription_only	2894.69	3098.72	3101.94	3288.96	1624.28	1298.77	2020.39	2101.3	-1.39969
ENSMUSG00000028070	Naxe	0.311905	-0.168627	-0.481754	0.000319463	0.0667257	-0.413805	-0.480521	4.77858e-05	-0.481754	0.000319463	-1.68401	-28.3972	transcription_only	1204.7	1225.15	986.519	1152.5	1104.76	1176.93	1223.2	1590.7	-1.68401
ENSMUSG00000004655	Aqp1	0.274498	-0.0821379	-0.356942	0.000321106	0.477583	0.120947	-0.35673	2.23613e-06	-0.356942	0.000321106	-1.24692	-16.6587	transcription_only	4771.98	5318.33	4607.15	4845.45	3527.87	3588.35	3914.38	4636.04	-1.24692
ENSMUSG00000051401	Kctd16	-0.75186	-0.186193	0.564907	0.000326854	0.865728	1.4314	0.565636	2.49999e-08	0.564907	0.000326854	1.96906	-166.091	transcription_only	1653.8	1795.64	1508.59	1499.49	760.056	1099.19	595.551	499.815	1.96906
ENSMUSG00000026547	Tagln2	0.753383	0.0648212	-0.688954	0.000328056	0.701213	0.0126522	-0.688468	4.40143e-22	-0.688954	0.000328056	-2.40035	4.91763	transcription_only	5361.56	5863.88	5675.03	5973.16	2830.58	3955	5026.24	6330.02	-2.40035
ENSMUSG00000038828	Tmem214	0.399003	-0.167152	-0.567487	0.000346925	1.55131	0.985153	-0.566362	4.70406e-05	-0.567487	0.000346925	-1.96337	-22.73	transcription_only	770.498	882.232	759.382	701.413	272.411	279.937	362.48	360.862	-1.96337
ENSMUSG00000036561	Ppp6r2	0.353889	-0.197827	-0.553064	0.000348058	2.19465	1.64293	-0.551731	5.3932e-07	-0.553064	0.000348058	-1.91269	-29.2056	transcription_only	1323.89	1384.14	1152.63	1189.68	327.616	253.027	368.165	369.573	-1.91269
ENSMUSG00000028703	Lrrc41	0.411914	-0.00613999	-0.418646	0.000352415	1.24317	0.825117	-0.418123	5.12703e-06	-0.418646	0.000352415	-1.44556	-0.853987	transcription_only	2034.8	2048.15	2074.74	1972.88	885.911	810.285	1042.3	1200.39	-1.44556
ENSMUSG00000060924	Csmd1	-0.574288	-0.163357	0.410479	0.000355486	-0.898282	-0.487351	0.410832	3.44656e-06	0.410479	0.000355486	1.41582	-164.122	transcription_only	2798.91	2768.27	2634.11	2324.82	4520.91	5694.79	3508.1	3303.76	1.41582
ENSMUSG00000045777	Ifitm10	0.402646	-0.291881	-0.697359	0.000376463	0.761163	0.0666363	-0.694859	0.000221807	-0.697359	0.000376463	-2.38795	-35.9386	transcription_only	440.589	408.383	372.911	322.204	271.425	222.38	298.277	350.907	-2.38795
ENSMUSG00000051149	Adnp	-0.332022	0.0876831	0.419195	0.000379986	0.0580021	0.477708	0.419619	1.25118e-05	0.419195	0.000379986	1.43374	165.207	transcription_only	1892.19	1739.52	1962.87	1888.61	1713.66	1727.46	1465.97	1248.5	1.43374
ENSMUSG00000025875	Tspan17	0.664107	0.214746	-0.450131	0.000123512	-2.51689	-2.96625	-0.449216	0.000382558	-0.449216	0.000382558	-1.53511	17.9191	transcription_only	819.453	863.527	952.618	983.961	4517.62	4942.06	7297.76	7588.89	-1.53511
ENSMUSG00000020432	Tcn2	0.46126	-0.109763	-0.572224	0.000385407	2.50625	1.93523	-0.571088	1.48497e-07	-0.572224	0.000385407	-1.95362	-13.3853	transcription_only	1330.28	1359.2	1254.34	1224.37	251.709	213.41	282.226	354.641	-1.95362
ENSMUSG00000042035	Igsf3	-0.313986	0.0389237	0.352501	0.000386886	0.0158392	0.368749	0.352926	2.02935e-06	0.352501	0.000386886	1.20288	172.933	transcription_only	3843.98	3719.09	3925.74	3811.92	3511.11	3855.95	3035.27	2849.57	1.20288
ENSMUSG00000070570	Slc17a7	0.218264	-0.123214	-0.341863	0.000387147	-1.12637	-1.46785	-0.3416	4.47299e-05	-0.341863	0.000387147	-1.16648	-29.4455	transcription_only	2860.63	2805.68	2484.94	2681.73	6229.31	5946.32	6757.71	7313.06	-1.16648
ENSMUSG00000036733	Rbm42	0.539847	0.0296781	-0.510941	0.000396709	2.20221	1.69204	-0.510117	1.61633e-07	-0.510941	0.000396709	-1.73798	3.14667	transcription_only	1694.24	1823.69	1756.07	1804.34	433.097	316.564	542.717	540.879	-1.73798
ENSMUSG00000030533	Unc45a	0.559082	0.0225927	-0.537384	0.000402164	3.06539	2.5289	-0.536405	1.20495e-07	-0.537384	0.000402164	-1.82474	2.31408	transcription_only	1798.54	1795.64	1661.15	1955.53	223.778	198.46	300.618	317.725	-1.82474
ENSMUSG00000032383	Ppib	0.410492	0.00920415	-0.401913	0.000406708	1.36762	0.966335	-0.401335	2.45217e-06	-0.401913	0.000406708	-1.36277	1.28448	transcription_only	2630.76	2487.71	2617.16	2518.15	1018.99	935.117	1187.42	1393.68	-1.36277
ENSMUSG00000019433	Gipc1	0.525825	-0.000248248	-0.527292	0.000411067	0.0211745	-0.504899	-0.526143	0.000206153	-0.527292	0.000411067	-1.78546	-0.02705	transcription_only	742.828	838.588	705.141	852.601	856.008	670.129	1017.55	1166.79	-1.78546
ENSMUSG00000020312	Shc2	0.579403	0.178787	-0.401368	0.000424327	0.251994	-0.148622	-0.400535	6.65025e-05	-0.401368	0.000424327	-1.35353	17.1487	transcription_only	1536.74	1683.41	1739.12	1868.78	1246.06	1407.53	1867.58	2070.19	-1.35353
ENSMUSG00000025738	Fbxl16	0.295496	-0.166873	-0.463311	0.000465102	0.656521	0.194152	-0.462464	0.000147793	-0.463311	0.000465102	-1.54396	-29.4544	transcription_only	1104.66	1087.98	901.766	1033.53	719.967	648.826	823.94	845.33	-1.54396
ENSMUSG00000037653	Kctd8	-0.586189	-0.101081	0.484273	0.000472732	0.242333	0.727441	0.484979	4.69002e-06	0.484273	0.000472732	1.6104	-170.216	transcription_only	1445.22	1536.89	1328.92	1425.13	1067.96	1409.03	795.182	842.842	1.6104
ENSMUSG00000027223	Mapk8ip1	0.363535	0.00164566	-0.362287	0.000472857	-0.385538	-0.747427	-0.362005	4.43903e-06	-0.362287	0.000472857	-1.2047	0.259366	transcription_only	3594.95	3818.85	3508.75	3849.1	5208.67	4304.08	5777.61	6383.53	-1.2047
ENSMUSG00000001910	Nacc1	0.467148	-0.11222	-0.5812	0.000477855	0.492751	-0.0866168	-0.57962	2.53236e-05	-0.5812	0.000477855	-1.92999	-13.5079	transcription_only	772.627	776.239	688.19	733.633	647.017	434.668	820.931	665.314	-1.92999
ENSMUSG00000022564	Grina	0.243408	-0.0604226	-0.304034	0.000497283	-0.136364	-0.440195	-0.303823	1.63645e-06	-0.304034	0.000497283	-1.00434	-13.9411	transcription_only	11348.9	12052	10682.2	11601.8	12951.5	12336.7	14118	15619.5	-1.00434
ENSMUSG00000052928	Ctif	0.283017	-0.0762156	-0.35984	0.000516178	0.501118	0.141886	-0.359347	3.28866e-05	-0.35984	0.000516178	-1.18287	-15.072	transcription_only	2632.89	2462.77	2345.95	2463.62	1844.11	1703.92	2091.95	2197.11	-1.18287
ENSMUSG00000028977	Casz1	-0.529265	-0.163891	0.364777	0.000517776	-0.335398	0.0299755	0.36525	5.18645e-05	0.364777	0.000517776	1.19861	-162.794	transcription_only	2441.33	2322.48	2200.17	2042.28	3015.25	2905.89	2059.52	2015.85	1.19861
ENSMUSG00000033004	Mycbp2	-0.455642	-0.0945443	0.360895	0.000535994	1.06205	1.42315	0.361074	2.55237e-06	0.360895	0.000535994	1.18043	-168.278	transcription_only	6968.54	6325.26	6586.96	5826.93	2925.54	3348.4	2343.75	2198.77	1.18043
ENSMUSG00000059316	Slc27a4	0.447949	0.0958893	-0.352475	0.000536399	0.31944	-0.0326193	-0.351992	2.50062e-06	-0.352475	0.000536399	-1.15277	12.0826	transcription_only	3586.44	3647.39	3746.06	3930.89	3102.66	2596.42	3718.1	4006.82	-1.15277
ENSMUSG00000020721	Helz	-0.487982	-0.00994433	0.477002	0.000370241	-1.48064	-1.0026	0.47793	0.000538639	0.47793	0.000538639	1.56221	-178.833	transcription_only	830.095	813.648	894.986	738.59	2207.55	2309.01	1705.73	1491.98	1.56221
ENSMUSG00000030500	Slc17a6	-0.265678	0.107284	0.372602	0.000548758	0.0352019	0.408165	0.372927	1.31935e-07	0.372602	0.000548758	1.21491	158.01	transcription_only	4759.21	4722.9	5247.87	4922.28	4088.14	5020.93	3551.9	3971.97	1.21491
ENSMUSG00000038665	Dgki	-0.623675	-0.188825	0.434484	0.000548767	0.73437	1.16922	0.434891	7.7923e-09	0.434484	0.000548767	1.41668	-163.156	transcription_only	4663.43	4545.21	4210.5	3841.66	2443.16	3007.55	1989.63	1521.84	1.41668
ENSMUSG00000045302	Preb	0.273205	-0.186554	-0.460976	0.000403835	-0.350523	-0.810282	-0.459998	0.000552795	-0.459998	0.000552795	-1.49841	-34.3266	transcription_only	915.233	854.175	728.871	815.424	1134.66	1089.85	1325.86	1344.73	-1.49841
ENSMUSG00000051373	Plpp7	0.536591	-0.199719	-0.739144	0.000578224	1.14397	0.407658	-0.73662	0.000311077	-0.739144	0.000578224	-2.39328	-20.4152	transcription_only	321.396	399.031	294.939	322.204	156.086	162.206	202.976	255.922	-2.39328
ENSMUSG00000025066	Sfr1	-0.330072	0.0829832	0.412435	0.000585976	0.0325297	0.445585	0.412915	1.80111e-05	0.412435	0.000585976	1.33304	165.888	transcription_only	1951.79	1764.46	2006.94	1923.31	1626.91	1959.93	1377.36	1455.89	1.33304
ENSMUSG00000055024	Ep300	-0.365425	0.165459	0.529839	0.000595651	1.24031	1.7712	0.530738	1.09055e-05	0.529839	0.000595651	1.70873	155.64	transcription_only	991.857	957.05	1135.68	1045.92	395.308	417.476	312.99	313.577	1.70873
ENSMUSG00000035559	Mpv17l2	0.636004	-0.0342539	-0.67265	0.000359923	-0.127209	-0.797467	-0.670702	0.000601293	-0.670702	0.000601293	-2.16027	-3.08285	transcription_only	340.552	399.031	328.84	381.688	455.114	334.13	600.232	619.273	-2.16027
ENSMUSG00000022620	Arsa	0.50551	-0.0239955	-0.530695	0.000601518	1.79858	1.26907	-0.529708	5.27622e-06	-0.530695	0.000601518	-1.70924	-2.71766	transcription_only	1130.21	1237.62	1098.39	1204.55	318.415	349.454	401.27	540.879	-1.70924
ENSMUSG00000031879	Fam96b	0.516143	-0.261585	-0.780943	0.000602882	0.96336	0.185632	-0.778235	0.000301236	-0.780943	0.000602882	-2.51445	-26.8762	transcription_only	442.717	336.682	257.648	386.645	178.76	217.895	224.377	339.294	-2.51445
ENSMUSG00000026958	Dpp7	0.414439	-0.0986535	-0.514188	0.000608154	1.59466	1.08157	-0.513249	4.27942e-05	-0.514188	0.000608154	-1.65362	-13.3896	transcription_only	998.242	950.815	861.085	946.784	322.687	313.2	395.919	446.308	-1.65362
ENSMUSG00000036985	Zdhhc9	0.428681	0.0211885	-0.408458	0.000623721	0.118232	-0.28926	-0.407689	0.000335069	-0.408458	0.000623721	-1.30911	2.82967	transcription_only	1153.62	1187.74	1217.05	1147.54	1065	1055.09	1372.34	1462.53	-1.30911
ENSMUSG00000020354	Sgcd	-0.443326	0.165742	0.607607	0.000158705	-1.81011	-1.20104	0.608953	0.000639375	0.608953	0.000639375	1.94515	159.501	transcription_only	457.616	383.443	437.323	503.134	1340.37	1581.7	1017.55	1116.6	1.94515
ENSMUSG00000028973	Abcb8	0.591221	-0.00259991	-0.595452	0.000644982	2.24244	1.64862	-0.593978	3.54434e-06	-0.595452	0.000644982	-1.89976	-0.251958	transcription_only	857.765	907.171	867.865	879.864	191.904	174.166	239.424	309.014	-1.89976
ENSMUSG00000022682	Rrn3	0.337984	-0.0395613	-0.37834	0.000650533	0.662491	0.284946	-0.377592	8.79949e-05	-0.37834	0.000650533	-1.20567	-6.67613	transcription_only	1934.76	1780.05	1806.92	1796.91	1112.98	1202.35	1437.21	1469.17	-1.20567
ENSMUSG00000026678	Rgs5	-0.367358	0.0460956	0.412775	0.00065319	-0.716558	-0.303104	0.41349	8.60876e-05	0.412775	0.00065319	1.31467	172.848	transcription_only	1496.3	1415.31	1420.45	1566.41	2132.96	2584.46	1810.06	1820.9	1.31467
ENSMUSG00000015599	Ttbk1	0.529777	0.0947835	-0.435944	0.000662236	0.294414	-0.14058	-0.434932	9.03714e-05	-0.435944	0.000662236	-1.38586	10.1436	transcription_only	1217.47	1253.21	1240.78	1373.08	1098.85	880.176	1477.01	1362.15	-1.38586
ENSMUSG00000040785	Ttc3	-0.471155	-0.13078	0.340091	0.000663257	0.967315	1.30769	0.340376	2.49565e-06	0.340091	0.000663257	1.08092	-164.487	transcription_only	7968.91	7176.31	7176.84	6610.14	3566.65	4066.75	2725.29	2742.97	1.08092
ENSMUSG00000020087	Tysnd1	0.543523	-0.0134884	-0.558625	0.000677365	0.924338	0.367327	-0.55722	0.000170928	-0.558625	0.000677365	-1.77038	-1.4216	transcription_only	638.534	657.777	596.658	674.15	376.578	294.139	472.16	499.815	-1.77038
ENSMUSG00000038502	Ptov1	0.271292	-0.0772124	-0.348925	0.000682953	1.17574	0.827232	-0.348622	2.94687e-06	-0.348925	0.000682953	-1.10456	-15.8869	transcription_only	3786.51	3843.79	3525.7	3658.25	1784.64	1536.1	2009.36	1972.71	-1.10456
ENSMUSG00000024790	Sac3d1	0.759675	0.0699937	-0.691934	0.000684045	1.55333	0.863653	-0.689684	0.000140749	-0.691934	0.000684045	-2.18991	5.26417	transcription_only	438.46	395.913	393.252	475.87	153.457	127.074	215.682	256.751	-2.18991
ENSMUSG00000040549	Ckap5	-0.527	-0.171016	0.355833	0.000692683	2.78959	3.14557	0.355974	4.42981e-08	0.355833	0.000692683	1.12424	-162.021	transcription_only	12061.9	11659.2	11014.4	9963.53	1635.78	1741.29	1224.54	1102.5	1.12424
ENSMUSG00000105867	Gm42517	0.797331	-0.0673678	-0.867476	8.42244e-05	-1.15435	-2.01905	-0.865241	0.000704156	-0.865241	0.000704156	-2.72753	-4.82955	transcription_only	195.817	236.924	176.285	228.021	541.208	398.789	804.545	819.614	-2.72753
ENSMUSG00000024736	Tmem132a	0.586861	0.0141209	-0.574394	0.000709742	0.721437	0.148696	-0.572926	0.000446873	-0.574394	0.000709742	-1.80871	1.37837	transcription_only	602.351	486.318	545.806	555.182	359.162	294.887	507.94	468.291	-1.80871
ENSMUSG00000034484	Snx2	-0.454748	0.0186061	0.472392	0.000710395	1.10203	1.57539	0.473289	1.49027e-05	0.472392	0.000710395	1.48733	177.657	transcription_only	1443.09	1337.38	1484.86	1330.95	610.214	667.513	484.533	440.916	1.48733
ENSMUSG00000030806	Stx1b	0.207643	-0.129141	-0.337426	0.000719814	-0.450091	-0.786875	-0.336764	7.73835e-05	-0.337426	0.000719814	-1.06046	-31.8789	transcription_only	2673.33	2562.52	2420.53	2349.61	3666.87	3377.56	3915.39	4166.51	-1.06046
ENSMUSG00000015467	Egfl8	0.631842	0.146395	-0.486507	0.000742603	0.686734	0.201287	-0.485309	0.000179971	-0.486507	0.000742603	-1.5224	13.045	transcription_only	855.636	894.701	881.426	1033.53	595.755	471.669	796.854	847.404	-1.5224
ENSMUSG00000047423	AI837181	0.306544	-0.122868	-0.430434	0.000752735	-0.00422032	-0.433633	-0.429614	0.000539429	-0.430434	0.000752735	-1.3444	-21.8417	transcription_only	1023.78	1072.39	884.816	1018.66	1014.07	1051.35	1201.47	1336.02	-1.3444
ENSMUSG00000032393	Dpp8	0.250995	-0.150759	-0.402575	0.000775355	1.3066	0.904849	-0.401854	5.70914e-05	-0.402575	0.000775355	-1.25221	-30.9909	transcription_only	1907.09	1861.1	1800.14	1588.71	730.482	769.546	854.37	918.747	-1.25221
ENSMUSG00000037260	Hgsnat	0.368918	-0.0160604	-0.385399	0.00078157	1.11788	0.732899	-0.385032	7.0012e-06	-0.385399	0.00078157	-1.19745	-2.49273	transcription_only	2724.41	2503.29	2596.82	2557.8	1114.95	1261.02	1381.37	1666.19	-1.19745
ENSMUSG00000024799	Tm7sf2	0.289412	-0.117871	-0.408007	0.000794917	0.0124787	-0.394805	-0.407378	0.000288184	-0.408007	0.000794917	-1.26469	-22.16	transcription_only	1509.07	1720.82	1339.09	1598.63	1488.57	1651.96	1763.58	2048.62	-1.26469
ENSMUSG00000019943	Atp2b1	-0.402291	-0.105156	0.296984	0.000857156	-0.360274	-0.0631388	0.297028	3.30752e-06	0.296984	0.000857156	0.910832	-165.351	transcription_only	6902.56	6702.47	6292.02	6292.89	8332.36	8861.56	6469.8	6451.14	0.910832
ENSMUSG00000070420	Zscan25	0.80425	-0.232251	-1.04167	0.000860095	3.26815	2.23164	-1.03725	1.3631e-06	-1.04167	0.000860095	-3.19318	-16.1077	transcription_only	300.111	321.095	247.477	275.112	31.8744	31.3948	57.8497	51.848	-3.19318
ENSMUSG00000025228	Actr1a	0.341275	0.0399198	-0.301508	0.000873989	0.0386498	-0.262705	-0.30134	2.33674e-06	-0.301508	0.000873989	-0.922159	6.67172	transcription_only	6600.32	6730.52	6902.24	6726.62	6743.9	6018.08	7724.77	8337.99	-0.922159
ENSMUSG00000072812	Ahnak2	0.274097	-0.0325651	-0.306817	0.00089137	2.32	2.01334	-0.306622	1.61642e-05	-0.306817	0.00089137	-0.935773	-6.77549	transcription_only	16916.9	14530.3	15730.1	14878.4	3042.2	3160.41	3594.04	3855.83	-0.935773
ENSMUSG00000036067	Slc2a6	0.405097	-0.0688661	-0.474995	0.00089435	1.97669	1.50272	-0.473964	1.1726e-05	-0.474995	0.00089435	-1.44802	-9.64798	transcription_only	1389.88	1574.3	1366.21	1430.09	385.122	352.818	440.059	531.339	-1.44802
ENSMUSG00000040354	Mars	0.67092	-0.0418234	-0.714307	0.000896549	3.87747	3.16473	-0.712974	2.10387e-09	-0.714307	0.000896549	-2.1768	-3.56706	transcription_only	1100.41	1028.75	1030.59	1031.05	76.2357	66.5271	109.012	116.969	-2.1768
ENSMUSG00000102697	Pcdhac2	-0.381651	-0.0503643	0.330843	0.000900179	-1.55694	-1.22565	0.331235	0.000161933	0.330843	0.000900179	1.00764	-172.482	transcription_only	2664.82	2447.18	2532.4	2394.22	7193.43	7639.4	5776.61	5530.32	1.00764
ENSMUSG00000061126	Cyp4f39	0.944343	-0.148539	-1.09693	0.000903515	4.13671	3.04383	-1.09304	4.55784e-09	-1.09693	0.000903515	-3.33914	-8.93903	transcription_only	425.69	392.796	389.861	349.467	22.0163	23.9198	40.127	47.7002	-3.33914
ENSMUSG00000027131	Emc4	0.413976	-0.107899	-0.522567	0.000931501	2.63744	2.11557	-0.521828	3.21616e-08	-0.522567	0.000931501	-1.5838	-14.6086	transcription_only	1909.22	1904.75	1762.85	1757.25	264.196	339.363	337.066	461.655	-1.5838
ENSMUSG00000041528	Rnf123	0.422771	-0.111623	-0.535351	0.000951398	2.61334	2.07894	-0.534407	4.09942e-07	-0.535351	0.000951398	-1.61764	-14.7902	transcription_only	1434.57	1490.13	1311.97	1373.08	244.151	225.37	267.513	358.374	-1.61764
ENSMUSG00000025393	Atp5b	0.6456	-0.0285641	-0.67454	0.000954942	2.2593	1.58514	-0.674204	2.41073e-36	-0.67454	0.000954942	-2.03713	-2.53335	transcription_only	29917.5	30878.1	28836.2	30408.6	5888.55	6605.62	7673.61	11738	-2.03713
ENSMUSG00000024740	Ddb1	0.328727	0.0366483	-0.292269	0.000968194	1.78417	1.49209	-0.292029	5.27592e-07	-0.292269	0.000968194	-0.88091	6.36139	transcription_only	10680.6	10515.1	10973.8	10657.5	3062.9	2992.97	3598.38	3957.04	-0.88091
ENSMUSG00000042229	Rabif	0.506832	-0.0786	-0.58771	0.000997575	0.180913	-0.404518	-0.5856	0.000352339	-0.58771	0.000997575	-1.76375	-8.81526	transcription_only	519.341	511.258	488.174	483.306	376.249	519.509	547.399	716.332	-1.76375
ENSMUSG00000109324	Prmt1	0.278515	-0.16293	-0.44227	0.00105679	0.843703	0.402258	-0.441662	0.000281563	-0.44227	0.00105679	-1.3162	-30.3273	transcription_only	1349.44	1109.8	1115.34	1083.1	708.795	646.583	764.084	869.803	-1.3162
ENSMUSG00000003273	Car11	0.507557	-0.00259279	-0.511499	0.000852226	0.0588645	-0.451285	-0.510197	0.00105847	-0.510197	0.00105847	-1.518	-0.292686	transcription_only	608.736	554.902	542.416	612.187	586.555	515.772	747.03	810.488	-1.518
ENSMUSG00000019494	Cops6	0.394172	-0.0219982	-0.416814	0.00107473	1.03076	0.614591	-0.416106	2.14253e-06	-0.416814	0.00107473	-1.2374	-3.19428	transcription_only	2258.28	2347.42	2274.76	2233.12	1039.04	1176.93	1212.17	1680.71	-1.2374
ENSMUSG00000036138	Acaa1a	0.297697	-0.236561	-0.536201	0.00111115	0.256641	-0.277616	-0.534426	0.000498538	-0.536201	0.00111115	-1.58406	-38.472	transcription_only	657.69	614.133	552.586	525.44	598.713	450.366	666.107	615.54	-1.58406
ENSMUSG00000034793	G6pc3	0.295571	-0.0724946	-0.368671	0.00111294	-0.209869	-0.577935	-0.36819	0.000518951	-0.368671	0.00111294	-1.08888	-13.7809	transcription_only	1483.53	1568.07	1352.65	1519.31	1741.26	1725.22	2009.69	2217.02	-1.08888
ENSMUSG00000029407	Uso1	-0.483746	-0.0942458	0.388895	0.00112419	0.937247	1.32675	0.389551	6.60943e-06	0.388895	0.00112419	1.14691	-168.975	transcription_only	2575.42	2472.12	2410.36	2302.52	1204.66	1392.58	964.05	879.757	1.14691
ENSMUSG00000029001	Fbxo44	0.286641	-0.184522	-0.472329	0.00112778	1.45415	0.982986	-0.471422	0.000187002	-0.472329	0.00112778	-1.39232	-32.771	transcription_only	1002.5	1156.56	891.596	983.961	389.065	382.718	453.769	481.565	-1.39232
ENSMUSG00000027012	Dync1i2	-0.257019	0.0223463	0.279287	0.0011356	-0.0488117	0.230554	0.279332	1.87515e-06	0.279287	0.0011356	0.822436	175.031	transcription_only	10257	10427.8	10594.1	10298.1	10365.1	10682.8	8883.44	8610.09	0.822436
ENSMUSG00000067242	Lgi1	-0.471438	0.12664	0.596573	0.000307294	-1.90165	-1.30357	0.598199	0.0011499	0.598199	0.0011499	1.75831	164.964	transcription_only	385.249	374.091	433.933	394.08	1316.05	1479.29	924.258	1078.44	1.75831
ENSMUSG00000001794	Capns1	0.396858	0.0659847	-0.331071	0.00115177	1.32823	0.997361	-0.330803	2.64868e-07	-0.331071	0.00115177	-0.972898	9.44007	transcription_only	10650.8	10942.2	10631.4	11817.4	4054.29	4405.36	4862.38	6200.61	-0.972898
ENSMUSG00000029598	Plbd2	0.414806	0.10843	-0.306561	0.00115207	0.649511	0.343134	-0.306385	1.63542e-05	-0.306561	0.00115207	-0.900835	14.6493	transcription_only	4501.67	4414.27	4624.1	4927.24	2810.86	2783.67	3497.06	3911.83	-0.900835
ENSMUSG00000041483	Zfp281	-0.49856	0.0946106	0.591448	0.000371913	-1.29239	-0.69922	0.593137	0.00116117	0.593137	0.00116117	1.74092	169.255	transcription_only	374.607	408.383	403.422	423.822	888.211	992.674	638.687	683.564	1.74092
ENSMUSG00000030878	Cdr2	-0.301891	0.196277	0.49679	0.00116594	-0.296877	0.201291	0.498193	0.000713047	0.49679	0.00116594	1.45724	146.97	transcription_only	600.222	586.076	667.85	684.063	659.504	776.274	580.169	576.135	1.45724
ENSMUSG00000002981	Clptm1	0.254302	-0.0535905	-0.308251	0.0011859	1.26144	0.953549	-0.307965	1.06942e-05	-0.308251	0.0011859	-0.901927	-11.9001	transcription_only	5025.27	4769.66	4674.95	4719.05	2087.61	1936.01	2404.61	2363.03	-0.901927
ENSMUSG00000037852	Cpe	-0.374543	-0.103054	0.271392	0.0011934	-0.228584	0.0429051	0.271517	1.091e-06	0.271392	0.0011934	0.793338	-164.616	transcription_only	19920.1	19465.2	17655.6	18799.4	22687.3	22725.3	17786.6	17006.2	0.793338
ENSMUSG00000024158	Hagh	0.326356	-0.0442816	-0.37107	0.00119489	1.42206	1.05142	-0.370568	0.000100118	-0.37107	0.00119489	-1.08452	-7.72699	transcription_only	2254.03	2179.08	1966.26	2297.56	814.276	814.77	988.795	1040.28	-1.08452
ENSMUSG00000030720	Cln3	0.425661	-0.241803	-0.670088	0.000666996	0.0378954	-0.629568	-0.667959	0.00124116	-0.667959	0.00124116	-1.9412	-29.5994	transcription_only	338.423	324.212	277.988	280.069	327.945	307.968	382.878	466.218	-1.9412
ENSMUSG00000026249	Serpine2	-0.28314	0.0355183	0.318152	0.00127091	-0.405135	-0.0864766	0.318678	8.72316e-05	0.318152	0.00127091	0.92133	172.85	transcription_only	3220.34	2967.79	3081.6	3231.95	4137.1	3940.79	3350.94	3243.2	0.92133
ENSMUSG00000032519	Slc25a38	0.508798	0.038567	-0.471828	0.00132774	0.274025	-0.196206	-0.470204	0.00109049	-0.471828	0.00132774	-1.3574	4.33474	transcription_only	664.076	654.659	684.8	664.236	573.739	499.327	746.696	770.669	-1.3574
ENSMUSG00000031590	Frg1	-0.548263	0.0955636	0.641377	0.00133869	0.14038	0.784207	0.643809	0.000932086	0.641377	0.00133869	1.84288	170.113	transcription_only	353.322	324.212	366.131	356.903	299.685	307.221	205.651	206.563	1.84288
ENSMUSG00000031168	Ebp	0.612409	0.175091	-0.438341	0.00133885	0.980238	0.54292	-0.437418	0.000510343	-0.438341	0.00133885	-1.25947	15.9555	transcription_only	853.508	966.402	993.299	1038.49	437.369	466.437	677.477	694.764	-1.25947
ENSMUSG00000046699	Slitrk4	-0.668198	-0.164656	0.502251	0.0013599	0.284124	0.787666	0.503445	2.48034e-05	0.502251	0.0013599	1.4397	-166.157	transcription_only	1117.44	1075.51	979.739	969.09	787.988	987.067	480.855	628.813	1.4397
ENSMUSG00000055720	Ubl7	0.307278	-0.205548	-0.513709	0.00139965	2.56884	2.05602	-0.513	2.63567e-06	-0.513709	0.00139965	-1.46611	-33.7798	transcription_only	1479.27	1555.6	1210.27	1392.91	260.91	241.441	268.851	349.248	-1.46611
ENSMUSG00000026965	Anapc2	0.380184	-0.0129726	-0.393646	0.00141594	2.12919	1.73604	-0.39309	6.45349e-08	-0.393646	0.00141594	-1.12148	-1.95429	transcription_only	4024.9	4161.76	3983.37	4074.64	883.611	956.42	996.82	1382.48	-1.12148
ENSMUSG00000003352	Cacnb3	0.269171	-0.0767658	-0.346477	0.00142216	1.29634	0.950408	-0.34606	5.22669e-05	-0.346477	0.00142216	-0.986437	-15.9178	transcription_only	2483.9	2450.3	2318.83	2334.74	956.232	1021.45	1158	1209.1	-0.986437
ENSMUSG00000024870	Rab1b	0.300716	-0.0297068	-0.33096	0.0014237	-0.508441	-0.838864	-0.330487	0.000232252	-0.33096	0.0014237	-0.942105	-5.64178	transcription_only	2398.76	2687.22	2393.41	2540.45	3629.08	3468	4047.81	4636.87	-0.942105
ENSMUSG00000015149	Sirt2	0.328156	-0.0873577	-0.416393	0.001427	2.02084	1.60533	-0.41551	1.8702e-05	-0.416393	0.001427	-1.18488	-14.9069	transcription_only	1836.85	2035.68	1779.8	1831.6	466.286	469.801	537.701	630.057	-1.18488
ENSMUSG00000000399	Ndufa9	0.238609	-0.102782	-0.341886	0.0014281	0.376789	0.0353979	-0.341525	2.00701e-05	-0.341886	0.0014281	-0.972747	-23.3042	transcription_only	3245.88	3416.7	2973.12	3179.9	2346.88	2696.59	2696.87	3212.92	-0.972747
ENSMUSG00000055421	Pcdh9	-0.474794	-0.109897	0.364252	0.00147139	-0.574295	-0.209398	0.36494	9.61068e-05	0.364252	0.00147139	1.03166	-166.968	transcription_only	2175.27	2057.5	2030.67	1883.65	2828.61	3383.91	2149.47	2289.61	1.03166
ENSMUSG00000010154	Spire2	0.282155	-0.169017	-0.452426	0.00148153	0.937758	0.486586	-0.451386	0.000171721	-0.452426	0.00148153	-1.28004	-30.9225	transcription_only	1145.11	1137.86	935.667	1075.67	644.389	527.732	658.751	758.226	-1.28004
ENSMUSG00000021892	Sh3bp5	-0.445594	-0.0148222	0.429736	0.00144631	-0.78761	-0.356839	0.430705	0.00150749	0.430705	0.00150749	1.21534	-178.095	transcription_only	768.37	776.239	739.042	778.246	1343.33	1278.59	974.082	938.242	1.21534
ENSMUSG00000025572	Tmc6	0.368395	-0.0851219	-0.454908	0.00154514	0.525634	0.072117	-0.453586	0.00087584	-0.454908	0.00154514	-1.27876	-13.0105	transcription_only	830.095	763.769	722.091	773.289	576.697	515.398	680.152	720.895	-1.27876
ENSMUSG00000042258	Isl1	-0.628215	-0.19399	0.43343	0.00154705	-0.185713	0.248512	0.434164	8.73355e-05	0.43343	0.00154705	1.21815	-162.84	transcription_only	1649.55	1443.37	1267.9	1422.65	1496.45	1979.37	1162.34	1069.73	1.21815
ENSMUSG00000020238	Ncln	0.513579	0.0685406	-0.446197	0.00155184	1.33614	0.891105	-0.445008	5.52193e-05	-0.446197	0.00155184	-1.25344	7.6016	transcription_only	1196.19	1234.5	1254.34	1276.42	534.636	410.749	663.098	678.587	-1.25344
ENSMUSG00000022892	App	-0.269235	0.00885827	0.277955	0.00161431	0.949875	1.22797	0.278057	2.06146e-07	0.277955	0.00161431	0.776055	178.116	transcription_only	36364.5	34488.1	36040.1	34872.4	17006.8	19097	14466.1	15284.8	0.776055
ENSMUSG00000021585	Cast	-0.404375	-0.0252208	0.378559	0.00168305	0.118388	0.497543	0.379211	4.76165e-06	0.378559	0.00168305	1.05008	-176.431	transcription_only	2867.02	2746.45	2661.23	2823	2233.84	2862.16	1790.33	2032.86	1.05008
ENSMUSG00000025870	Arl10	0.720565	-0.117894	-0.843319	0.00173006	2.18495	1.34649	-0.83907	0.000193931	-0.843319	0.00173006	-2.32919	-9.292	transcription_only	272.441	283.686	284.768	228.021	55.2051	65.0321	92.6264	104.111	-2.32919
ENSMUSG00000021235	Coq6	0.321483	-0.322563	-0.646872	0.00173743	1.40255	0.758503	-0.644658	0.000624205	-0.646872	0.00173743	-1.78543	-45.0961	transcription_only	425.69	430.205	369.521	314.768	161.015	157.348	189.6	205.733	-1.78543
ENSMUSG00000040857	Erf	0.7042	0.229336	-0.476268	0.00118714	-0.00724824	-0.482112	-0.47484	0.0017559	-0.47484	0.0017559	-1.30842	18.0388	transcription_only	570.424	611.015	745.822	634.494	619.415	545.298	932.952	952.759	-1.30842
ENSMUSG00000031740	Mmp2	0.507252	0.0861667	-0.421862	0.00175846	1.29779	0.876702	-0.421181	0.000449327	-0.421862	0.00175846	-1.16217	9.64079	transcription_only	1087.64	1218.91	1305.19	1130.19	463	456.72	631.331	667.388	-1.16217
ENSMUSG00000002608	Ccdc97	0.274712	-0.195878	-0.472236	0.00175958	0.655269	0.184679	-0.470685	0.000725139	-0.472236	0.00175958	-1.30082	-35.49	transcription_only	789.654	788.709	644.119	721.241	536.607	448.871	587.191	597.704	-1.30082
ENSMUSG00000052565	Hist1h1d	1.02749	0.226931	-0.801652	0.00176875	4.3497	3.54915	-0.800477	3.21418e-09	-0.801652	0.00176875	-2.20641	12.4544	transcription_only	925.875	801.178	1111.95	917.042	34.1746	49.7084	86.9417	82.5421	-2.20641
ENSMUSG00000033707	Lrrc24	0.476777	-0.100801	-0.579448	0.00181296	1.72437	1.14679	-0.577649	0.000125157	-0.579448	0.00181296	-1.58862	-11.9378	transcription_only	621.507	698.303	637.339	584.924	220.163	170.803	248.787	292.423	-1.58862
ENSMUSG00000034854	Mfsd12	0.497816	-0.202937	-0.704167	0.000961263	-0.141432	-0.842185	-0.701416	0.00185899	-0.701416	0.00185899	-1.91537	-22.1785	transcription_only	272.441	305.508	277.988	223.064	361.134	262.745	431.365	444.649	-1.91537
ENSMUSG00000113949	Scamp4	0.491975	-0.0368918	-0.53045	0.000658298	-0.731765	-1.26063	-0.528961	0.00186327	-0.528961	0.00186327	-1.44392	-4.28842	transcription_only	472.515	486.318	433.933	490.741	822.491	741.889	1054.34	1131.95	-1.44392
ENSMUSG00000024163	Mapk8ip3	0.327452	-0.00858774	-0.33621	0.00188224	1.7469	1.41086	-0.336119	3.79195e-08	-0.33621	0.00188224	-0.916282	-1.50229	transcription_only	11414.9	10596.1	10967	10813.7	3724.38	2730.23	4001.33	4047.88	-0.916282
ENSMUSG00000001441	Npepps	-0.273338	0.0662959	0.339201	0.00188245	-0.743492	-0.403859	0.339664	1.52329e-06	0.339201	0.00188245	0.924415	166.367	transcription_only	4714.51	4570.15	4952.94	4728.96	7500.34	7804.97	5485.35	7093.64	0.924415
ENSMUSG00000053198	Prx	0.452958	0.107828	-0.345372	0.00188691	0.920357	0.575227	-0.345101	3.66233e-06	-0.345372	0.00188691	-0.940879	13.3902	transcription_only	5082.73	4607.56	5366.53	5046.21	2880.85	2163.25	3485.36	3376.34	-0.940879
ENSMUSG00000022437	Samm50	0.32784	-0.0538019	-0.382472	0.00195434	0.29317	-0.0884719	-0.381605	0.000282582	-0.382472	0.00195434	-1.03612	-9.31973	transcription_only	1496.3	1602.36	1400.11	1554.01	1269.72	1212.81	1377.36	1718.87	-1.03612
ENSMUSG00000038383	Pigu	0.507881	0.029924	-0.479616	0.00196358	0.67665	0.198693	-0.477919	0.000958744	-0.479616	0.00196358	-1.2983	3.37193	transcription_only	719.415	657.777	650.899	746.026	408.452	442.143	543.386	658.263	-1.2983
ENSMUSG00000019852	Arfgef3	-0.366769	-0.0286507	0.337918	0.00197851	0.379626	0.717744	0.338042	1.52915e-06	0.337918	0.00197851	0.913614	-175.533	transcription_only	5857.49	5405.62	5607.22	5395.67	3759.86	4773.88	3373.34	3197.16	0.913614
ENSMUSG00000010045	Tmem115	0.462876	-0.0718541	-0.536512	0.00198663	1.03458	0.499854	-0.534783	0.000658139	-0.536512	0.00198663	-1.44959	-8.82382	transcription_only	606.608	676.481	532.246	669.193	332.217	281.432	374.853	466.218	-1.44959
ENSMUSG00000024479	Mal2	-0.422952	-0.0154898	0.406561	0.00123303	-2.34254	-1.93508	0.407251	0.00205967	0.407251	0.00205967	1.09396	-177.903	transcription_only	855.636	1010.05	861.085	959.176	4328.35	4934.22	3386.71	3474.23	1.09396
ENSMUSG00000026197	Zfand2b	0.598363	-0.0796256	-0.681411	0.00208065	1.28151	0.603518	-0.678487	0.00113529	-0.681411	0.00208065	-1.82741	-7.57995	transcription_only	302.24	321.095	281.378	302.376	130.126	121.468	177.896	200.756	-1.82741
ENSMUSG00000003299	Mrpl4	0.424917	-0.131794	-0.558677	0.00211722	1.35095	0.794237	-0.556765	0.000481762	-0.558677	0.00211722	-1.49403	-17.2321	transcription_only	595.965	561.137	484.784	562.617	236.265	210.794	269.519	327.265	-1.49403
ENSMUSG00000021066	Atl1	-0.386047	-0.0880027	0.297856	0.00213398	0.293685	0.591729	0.298023	9.8967e-06	0.297856	0.00213398	0.795517	-167.158	transcription_only	5859.62	5726.71	5264.82	5569.17	4600.43	4703.99	3757.22	3313.71	0.795517
ENSMUSG00000067150	Xpo5	0.643157	-0.0663636	-0.710889	0.00216521	4.53948	3.82996	-0.709664	1.9556e-11	-0.710889	0.00216521	-1.89416	-5.89116	transcription_only	1583.57	1452.72	1501.81	1395.39	72.9497	55.6884	85.9386	114.066	-1.89416
ENSMUSG00000029578	Wipi2	0.430243	0.0761929	-0.354817	0.0021714	0.515037	0.160987	-0.354027	0.000771454	-0.354817	0.0021714	-0.94497	10.0425	transcription_only	1426.06	1387.25	1535.72	1422.65	977.262	961.279	1273.36	1321.5	-0.94497
ENSMUSG00000022935	Grik1	-0.54551	-0.194481	0.350516	0.00221085	-0.112896	0.238134	0.350868	3.85203e-05	0.350516	0.00221085	0.930775	-160.378	transcription_only	3230.98	2942.85	2779.88	2604.89	2934.09	3651.51	2173.21	2307.03	0.930775
ENSMUSG00000002107	Celf2	-0.36078	0.0968906	0.456445	0.00052058	-3.15746	-2.69979	0.457496	0.00222804	0.457496	0.00222804	1.21331	164.967	transcription_only	627.892	576.724	623.778	659.279	5340.44	5267.97	4226.37	3979.03	1.21331
ENSMUSG00000028809	Srrm1	-0.3697	0.0710894	0.439819	0.00223951	-0.141632	0.299158	0.440651	0.000203926	0.439819	0.00223951	1.16545	169.115	transcription_only	1074.87	1016.28	1132.29	1060.79	1205.97	1067.42	986.12	761.129	1.16545
ENSMUSG00000024019	Cmtr1	0.263994	-0.106343	-0.371284	0.00226613	0.451102	0.0807645	-0.370431	0.000946942	-0.371284	0.00226613	-0.981939	-21.9407	transcription_only	1351.56	1237.62	1162.8	1231.81	927.972	940.723	1076.41	1152.69	-0.981939
ENSMUSG00000029869	Ephb6	0.535063	-0.0380351	-0.575306	0.00231044	1.33476	0.761663	-0.573375	0.000436174	-0.575306	0.00231044	-1.51668	-4.06604	transcription_only	506.571	598.546	508.515	552.703	244.151	183.884	283.898	333.072	-1.51668
ENSMUSG00000035168	Tanc1	-0.510472	-0.169958	0.340132	0.00231113	0.864374	1.20489	0.340376	4.01451e-05	0.340132	0.00231113	0.896647	-161.585	transcription_only	2907.46	2949.08	2661.23	2520.63	1553.96	1610.1	1164.35	1041.11	0.896647
ENSMUSG00000033460	Armcx1	-0.375272	-0.0481159	0.326794	0.0023241	0.175713	0.502869	0.327071	3.6671e-05	0.326794	0.0023241	0.860692	-172.694	transcription_only	3050.07	3092.49	2959.56	2946.93	2462.54	2887.57	2084.6	2010.87	0.860692
ENSMUSG00000024079	Eif2ak2	-0.733193	-0.206065	0.525502	0.00235651	0.226913	0.754041	0.526681	0.00119758	0.525502	0.00235651	1.38088	-164.302	transcription_only	576.809	542.432	461.054	503.134	458.4	484.751	282.226	281.224	1.38088
ENSMUSG00000070733	Fryl	-0.484934	-0.121313	0.363376	0.00239429	1.83195	2.19558	0.363525	6.4525e-06	0.363376	0.00239429	0.952345	-165.955	transcription_only	4195.17	3890.55	3905.39	3512.02	1072.56	1165.72	853.032	734.583	0.952345
ENSMUSG00000003233	Dvl3	0.61312	0.0376301	-0.577125	0.00242324	2.64952	2.07403	-0.575711	2.99902e-05	-0.577125	0.00242324	-1.50953	3.51211	transcription_only	744.957	735.712	789.893	726.198	115.668	116.609	178.231	174.624	-1.50953
ENSMUSG00000033430	Terf2ip	-0.284087	0.127145	0.410436	0.00251671	0.431447	0.842679	0.411324	0.000397384	0.410436	0.00251671	1.06679	155.889	transcription_only	1059.97	1200.21	1217.05	1226.85	758.742	883.913	674.467	664.899	1.06679
ENSMUSG00000005161	Prdx2	0.30888	0.0252048	-0.284118	0.0025213	-0.724296	-1.00797	-0.28371	0.000405175	-0.284118	0.0025213	-0.738244	4.66502	transcription_only	3265.04	3597.51	3396.88	3526.89	5453.48	5676.85	6601.22	7093.23	-0.738244
ENSMUSG00000002416	Ndufb2	0.304607	-0.0885798	-0.394328	0.00256839	0.11455	-0.278637	-0.39332	0.000237921	-0.394328	0.00256839	-1.02144	-16.2145	transcription_only	1396.26	1412.19	1264.51	1355.73	1159.31	1392.96	1372.01	1758.69	-1.02144
ENSMUSG00000002768	Mea1	0.440626	-0.0908406	-0.532816	0.00259349	2.04669	1.51522	-0.531539	0.00010552	-0.532816	0.00259349	-1.37792	-11.649	transcription_only	876.921	1028.75	789.893	971.568	230.35	221.259	256.478	352.981	-1.37792
ENSMUSG00000040813	Tex264	0.447583	0.069154	-0.379225	0.00263714	0.619942	0.241513	-0.378551	0.000299972	-0.379225	0.00263714	-0.977969	8.78305	transcription_only	1587.82	1786.28	1634.03	1863.83	1181	970.996	1344.59	1572.45	-0.977969
ENSMUSG00000025262	Fam120c	0.496317	-0.228692	-0.726996	0.00266756	3.89973	3.17473	-0.725167	5.08759e-08	-0.726996	0.00266756	-1.87121	-24.7392	transcription_only	849.251	910.288	749.212	741.069	55.2051	60.5471	83.2634	78.809	-1.87121
ENSMUSG00000019471	Cdc37	0.414828	0.0650324	-0.350292	0.00267299	1.83357	1.48377	-0.349828	1.20657e-05	-0.350292	0.00267299	-0.901303	8.90972	transcription_only	2877.66	2970.91	2996.85	3078.29	796.86	816.265	955.022	1181.72	-0.901303
ENSMUSG00000006728	Cdk4	0.582269	0.0683323	-0.515567	0.00181142	-0.280303	-0.794239	-0.513882	0.00268081	-0.513882	0.00268081	-1.32157	6.69335	transcription_only	432.075	498.788	467.834	495.698	586.226	519.509	739.339	906.304	-1.32157
ENSMUSG00000022094	Slc39a14	0.252719	-0.254273	-0.509137	0.00268752	0.567716	0.0607248	-0.507264	0.00233463	-0.509137	0.00268752	-1.30881	-45.1756	transcription_only	551.268	517.493	427.153	463.478	336.817	374.495	423.339	418.103	-1.30881
ENSMUSG00000078789	Dph1	0.76332	0.206128	-0.559227	0.00271041	1.36288	0.805687	-0.557119	0.00107674	-0.559227	0.00271041	-1.43552	15.1118	transcription_only	461.873	433.322	555.976	478.349	169.887	173.419	265.507	313.577	-1.43552
ENSMUSG00000056158	Car10	-0.524264	-0.0143674	0.508307	0.00104693	-1.62614	-1.11624	0.509902	0.00272606	0.509902	0.00272606	1.30762	-178.43	transcription_only	559.782	452.027	478.004	522.962	1426.79	1670.28	1068.05	1070.14	1.30762
ENSMUSG00000036186	Fam69b	0.396033	-0.089823	-0.487779	0.00272859	0.446216	-0.0396402	-0.485844	0.000920767	-0.487779	0.00272859	-1.2507	-12.7789	transcription_only	647.048	723.243	644.119	632.015	560.924	423.83	592.541	696.008	-1.2507
ENSMUSG00000024644	Cndp2	0.491395	0.152554	-0.33947	0.00277022	1.15247	0.813624	-0.338932	0.000130941	-0.33947	0.00277022	-0.86819	17.247	transcription_only	2277.44	2537.58	2590.04	2711.47	1012.75	1112.65	1366.32	1601.48	-0.86819
ENSMUSG00000059325	Hopx	-0.475828	-0.110746	0.364198	0.00279765	-2.65679	-2.2917	0.365027	0.00185561	0.364198	0.00279765	0.929871	-166.898	transcription_only	1153.62	1109.8	1010.25	1073.19	7338.01	6721.48	4616.94	5427.04	0.929871
ENSMUSG00000022557	Bop1	0.466476	-0.0387605	-0.506334	0.00280126	2.52419	2.01896	-0.505271	1.29681e-05	-0.506334	0.00280126	-1.29249	-4.74992	transcription_only	1198.32	1116.04	1159.41	1090.54	215.234	181.268	243.771	301.133	-1.29249
ENSMUSG00000071650	Ganab	0.277601	-0.0120724	-0.290076	0.00282974	1.40378	1.11411	-0.289716	6.99401e-05	-0.290076	0.00282974	-0.739187	-2.49013	transcription_only	4390.99	4479.74	4519	4235.74	1641.04	1656.08	1921.08	2049.03	-0.739187
ENSMUSG00000019139	Isyna1	0.576787	-0.161806	-0.739872	0.00283933	4.35715	3.61855	-0.73857	5.02253e-10	-0.739872	0.00283933	-1.88429	-15.6704	transcription_only	1147.23	1303.08	1033.98	1130.19	64.7346	52.3247	70.5566	103.281	-1.88429
ENSMUSG00000024268	Celf4	-0.3375	0.0203606	0.357179	0.00286943	-1.29476	-0.936904	0.357723	0.000255054	0.357179	0.00286943	0.908021	176.548	transcription_only	1921.99	1751.99	1779.8	1928.27	4580.71	4310.43	3078.07	3913.07	0.908021
ENSMUSG00000044795	Cyb5d1	0.862177	-0.42208	-1.296	0.00136132	0.777537	-0.50672	-1.28752	0.00289838	-1.28752	0.00289838	-3.26752	-26.0841	transcription_only	78.7526	77.9356	50.8515	64.4408	50.6047	39.2435	72.5629	90.0082	-3.26752
ENSMUSG00000038916	Soga3	-0.382144	-0.0630914	0.318705	0.00296028	1.91018	2.22923	0.319088	5.98071e-07	0.318705	0.00296028	0.805899	-170.625	transcription_only	7023.88	7285.42	6681.89	6922.43	1707.09	2037.67	1458.61	1394.09	0.805899
ENSMUSG00000020048	Hsp90b1	-0.429266	-0.131866	0.297283	0.00298261	2.44807	2.74547	0.297413	2.52983e-07	0.297283	0.00298261	0.75076	-162.924	transcription_only	12640.9	12647.4	11712.8	11247.4	2234.82	2325.08	1794.68	1567.88	0.75076
ENSMUSG00000002688	Prkd1	-0.478584	0.0373776	0.514217	0.00298941	-0.574164	-0.0582025	0.515782	0.00249341	0.514217	0.00298941	1.2981	175.534	transcription_only	491.672	461.379	528.856	451.085	610.871	789.355	495.233	502.304	1.2981
ENSMUSG00000040003	Magi2	-0.481153	0.103309	0.582535	0.00141195	-1.39526	-0.810795	0.584241	0.00300988	0.584241	0.00300988	1.47314	167.882	transcription_only	376.735	342.917	440.713	337.075	821.505	1048.36	705.566	623.836	1.47314
ENSMUSG00000040446	Rprd1a	0.294387	-0.267246	-0.563707	0.00306554	2.01281	1.45118	-0.562044	0.00025591	-0.563707	0.00306554	-1.41687	-42.2333	transcription_only	696.003	614.133	555.976	532.876	159.701	161.085	205.985	184.579	-1.41687
ENSMUSG00000025132	Arhgdia	0.302632	0.0186996	-0.28415	0.0030668	-0.542771	-0.826704	-0.283937	8.31446e-05	-0.28415	0.0030668	-0.714157	3.5358	transcription_only	6055.43	6312.79	5841.14	6590.31	9592.22	8118.55	10679.8	11023.7	-0.714157
ENSMUSG00000060601	Nr1h2	0.449766	-0.130391	-0.582826	0.00307675	0.547663	-0.0324937	-0.580364	0.00152971	-0.582826	0.00307675	-1.46401	-16.1673	transcription_only	451.231	423.97	352.57	438.693	351.604	238.077	380.537	420.591	-1.46401
ENSMUSG00000035203	Epn1	0.451739	0.0682023	-0.384291	0.00308875	-0.800653	-1.18419	-0.383549	0.000178681	-0.384291	0.00308875	-0.964655	8.58551	transcription_only	1541	1714.58	1627.25	1749.81	3283.06	2274.63	3929.43	3625.21	-0.964655
ENSMUSG00000000753	Serpinf1	0.373759	0.064951	-0.309237	0.00309932	2.28996	1.98115	-0.308876	1.68141e-05	-0.309237	0.00309932	-0.775794	9.85828	transcription_only	4382.47	4573.26	4519	4778.53	917.785	882.044	1112.52	1204.53	-0.775794
ENSMUSG00000031093	Dock11	-0.581485	-0.167936	0.413081	0.00310731	2.35022	2.76377	0.413532	1.63968e-06	0.413081	0.00310731	1.03585	-163.891	transcription_only	4548.49	4317.63	4288.48	3586.38	737.054	976.229	537.032	599.778	1.03585
ENSMUSG00000018585	Atox1	0.446647	0.0588003	-0.388625	0.00314724	1.42851	1.04066	-0.387957	0.000200442	-0.388625	0.00314724	-0.972367	7.49976	transcription_only	1472.89	1580.53	1491.64	1655.63	594.77	518.388	697.54	810.488	-0.972367
ENSMUSG00000062825	Actg1	0.761194	-0.357222	-1.12329	0.000397326	-0.969802	-2.08822	-1.12022	0.00315725	-1.12022	0.00315725	-2.80133	-25.1402	transcription_only	93.6517	105.992	74.5822	79.3117	183.031	199.955	282.895	362.107	-2.80133
ENSMUSG00000027665	Pik3ca	-0.367995	0.0616832	0.428298	0.00317371	-1.27891	-0.849236	0.429651	0.000384941	0.428298	0.00317371	1.07007	170.485	transcription_only	966.315	981.989	1006.86	1013.7	2047.85	2602.78	1540.88	2037.84	1.07007
ENSMUSG00000029675	Eln	0.562987	0.0870368	-0.477749	0.00320368	0.465981	-0.00996985	-0.476014	0.00287456	-0.477749	0.00320368	-1.19167	8.78824	transcription_only	506.571	539.315	532.246	567.574	344.375	399.162	566.793	523.458	-1.19167
ENSMUSG00000031328	Flna	0.352907	0.00303561	-0.350301	0.00326043	1.83221	1.48233	-0.349931	0.000108907	-0.350301	0.00326043	-0.871102	0.492829	transcription_only	3809.92	3472.81	3966.42	3321.18	1104.76	909.702	1344.25	1212	-0.871102
ENSMUSG00000041241	Mul1	0.299357	-0.0839587	-0.384383	0.0032832	0.114555	-0.268761	-0.38331	0.00235484	-0.384383	0.0032832	-0.954693	-15.6669	transcription_only	951.416	947.697	847.525	929.434	894.455	831.215	1017.55	1092.54	-0.954693
ENSMUSG00000045767	B230219D22Rik	0.433453	0.0398258	-0.394718	0.00300545	-0.609989	-1.00362	-0.393814	0.00333117	-0.393814	0.00333117	-0.975635	5.24962	transcription_only	793.911	823	769.553	874.907	1125.79	1299.89	1553.25	1699.79	-0.975635
ENSMUSG00000021319	Sfrp4	-0.289389	0.0538662	0.342941	0.00337845	1.65576	1.99901	0.34317	2.89623e-05	0.342941	0.00337845	0.847505	169.456	transcription_only	2764.85	2690.34	2749.37	2880.01	848.45	856.256	700.55	684.809	0.847505
ENSMUSG00000040297	Suco	-0.247696	0.206613	0.453251	0.00241251	-0.590027	-0.135718	0.454469	0.00346526	0.454469	0.00346526	1.11811	140.167	transcription_only	761.984	582.959	854.305	708.848	1006.51	1001.64	899.178	780.209	1.11811
ENSMUSG00000048878	Hexim1	-0.515392	-0.120175	0.394329	0.0034656	0.265795	0.661012	0.395109	0.000888916	0.394329	0.0034656	0.970137	-166.875	transcription_only	1074.87	1097.33	986.519	998.832	908.913	867.094	640.025	593.971	0.970137
ENSMUSG00000025810	Nrp1	-0.332501	0.0604486	0.392603	0.00354153	2.392	2.78495	0.393016	1.51543e-06	0.392603	0.00354153	0.962196	169.696	transcription_only	2818.07	2749.57	2952.78	2830.44	488.96	555.763	404.948	418.932	0.962196
ENSMUSG00000007440	Pcdha11	-0.375957	0.233842	0.608554	0.000228879	-4.7834	-4.1736	0.609754	0.00354654	0.609754	0.00354654	1.49402	148.119	transcription_only	270.313	280.568	315.279	327.161	7224.97	7678.64	5820.75	5585.07	1.49402
ENSMUSG00000017210	Med24	0.31092	-0.0863322	-0.398256	0.00367756	1.52523	1.12797	-0.397249	0.000180261	-0.398256	0.00367756	-0.969529	-15.5182	transcription_only	1396.26	1443.37	1342.48	1316.08	534.636	434.295	600.232	594.386	-0.969529
ENSMUSG00000022037	Clu	0.240933	-0.0319855	-0.273038	0.00373395	3.93232	3.6594	-0.272959	4.35802e-07	-0.273038	0.00373395	-0.662889	-7.56218	transcription_only	23923.8	22835.1	22340.8	23141.7	1587.48	1426.22	1740.51	1798.09	-0.662889
ENSMUSG00000002326	Gmpr2	0.444101	-0.0978926	-0.544077	0.00376493	2.10293	1.56094	-0.542269	0.000226363	-0.544077	0.00376493	-1.31898	-12.4309	transcription_only	657.69	701.421	596.658	659.279	149.185	161.459	192.609	227.302	-1.31898
ENSMUSG00000018012	Rac3	0.540601	0.097628	-0.444292	0.00337883	-0.26962	-0.712592	-0.44303	0.00385785	-0.44303	0.00385785	-1.06932	10.2368	transcription_only	570.424	614.133	579.707	671.671	774.186	626.027	987.457	1036.96	-1.06932
ENSMUSG00000015714	Cers2	0.351408	0.0217364	-0.330323	0.00389429	0.142486	-0.187186	-0.329681	0.000993685	-0.330323	0.00389429	-0.795938	3.53953	transcription_only	1602.72	1720.82	1617.08	1725.03	1422.85	1533.49	1740.51	2005.9	-0.795938
ENSMUSG00000044167	Foxo1	-0.331232	0.111461	0.441397	0.00230416	-1.19675	-0.754056	0.442631	0.00392929	0.442631	0.00392929	1.06483	161.402	transcription_only	576.809	548.667	623.778	589.881	1331.5	1210.94	1021.23	986.357	1.06483
ENSMUSG00000038181	Chpf2	0.330757	-0.0132067	-0.344773	0.00396788	0.163093	-0.18087	-0.344128	0.000571194	-0.344773	0.00396788	-0.827951	-2.28653	transcription_only	1598.46	1596.12	1549.28	1596.15	1550.02	1255.79	1803.37	1703.1	-0.827951
ENSMUSG00000023000	Dhh	0.53544	0.147641	-0.388619	0.0039733	0.871153	0.483354	-0.387822	0.00098742	-0.388619	0.0039733	-0.933017	15.4155	transcription_only	1221.73	1094.22	1179.75	1370.61	656.875	592.764	819.259	980.965	-0.933017
ENSMUSG00000023886	Smoc2	-0.301706	-0.0112199	0.290004	0.00399867	-0.382694	-0.0922086	0.290398	0.000697536	0.290004	0.00399867	0.695455	-177.87	transcription_only	2543.5	2771.39	2634.11	2599.94	3450.98	3350.65	2720.61	2760.8	0.695455
ENSMUSG00000022982	Sod1	0.220401	-0.0870937	-0.308202	0.00403491	-1.04289	-1.35039	-0.30762	0.00233622	-0.308202	0.00403491	-0.737887	-21.5619	transcription_only	1719.79	1593	1518.76	1586.23	3371.46	3359.62	3700.71	4089.36	-0.737887
ENSMUSG00000060098	Prmt7	0.537963	0.0826128	-0.456678	0.00408757	1.87026	1.41491	-0.455293	0.00018645	-0.456678	0.00408757	-1.09079	8.73048	transcription_only	985.471	944.58	1047.54	991.396	246.78	273.583	333.388	417.273	-1.09079
ENSMUSG00000042581	Thsd7b	-0.564426	0.090214	0.651608	0.0032009	-0.381483	0.273157	0.654307	0.00409046	0.654307	0.00409046	1.56264	170.919	transcription_only	257.542	230.69	247.477	270.156	292.784	335.999	227.72	194.119	1.56264
ENSMUSG00000022456	Sept3	0.25058	-0.154977	-0.407108	0.00415805	0.0605063	-0.345051	-0.405864	0.00293842	-0.407108	0.00415805	-0.969369	-31.7358	transcription_only	796.04	794.944	698.361	721.241	738.369	762.819	810.899	963.544	-0.969369
ENSMUSG00000021464	Ror2	-0.574948	-0.0127983	0.55972	0.00416603	-0.519927	0.0422227	0.561901	0.00292573	0.55972	0.00416603	1.33229	-178.725	transcription_only	391.634	358.504	372.911	369.295	532.992	528.853	411.97	295.326	1.33229
ENSMUSG00000050708	Ftl1	0.528678	0.0528617	-0.477548	0.00220425	-2.45118	-2.92699	-0.475998	0.00418331	-0.475998	0.00418331	-1.13215	5.70994	transcription_only	472.515	511.258	478.004	530.397	3038.25	2235.76	3700.37	3861.23	-1.13215
ENSMUSG00000035969	Rusc2	0.313258	-0.0252521	-0.338993	0.00422627	1.29702	0.958513	-0.338498	2.49199e-06	-0.338993	0.00422627	-0.804784	-4.60872	transcription_only	4246.25	4414.27	4173.21	4277.88	2013.67	1448.65	2234.74	2040.74	-0.804784
ENSMUSG00000036966	Spryd3	0.270033	-0.0129857	-0.283589	0.00424465	-0.961618	-1.24464	-0.283123	0.00171427	-0.283589	0.00424465	-0.672718	-2.75319	transcription_only	2100.78	2222.72	2091.69	2158.77	4198.55	4071.23	4825.6	5080.28	-0.672718
ENSMUSG00000003617	Cp	-0.35021	0.0656535	0.415207	0.00426051	2.35652	2.77239	0.415738	1.06178e-06	0.415207	0.00426051	0.984265	169.382	transcription_only	2534.98	2565.64	2752.76	2562.76	469.244	510.539	340.745	423.08	0.984265
ENSMUSG00000028467	Gba2	0.417361	-0.142422	-0.561761	0.00429822	2.4957	1.93591	-0.559888	0.00012176	-0.561761	0.00429822	-1.32953	-18.8419	transcription_only	674.718	732.595	606.828	654.322	125.855	118.852	158.836	165.914	-1.32953
ENSMUSG00000016319	Slc25a5	0.305106	-0.152004	-0.458905	0.00441319	-0.173468	-0.630578	-0.457344	0.000877316	-0.458905	0.00441319	-1.08083	-26.4825	transcription_only	781.14	779.356	694.97	701.413	716.681	1016.22	911.216	1214.49	-1.08083
ENSMUSG00000037553	Zdhhc18	0.502321	0.156602	-0.346378	0.00455029	-0.393211	-0.738931	-0.345721	0.00158048	-0.346378	0.00455029	-0.811205	17.3152	transcription_only	1368.59	1393.49	1396.72	1650.67	1977.2	1588.05	2426.01	2592.82	-0.811205
ENSMUSG00000062151	Unc13c	-0.488924	-0.0596304	0.428019	0.00456771	-0.605092	-0.175798	0.429048	0.00412318	0.428019	0.00456771	1.00169	-173.046	transcription_only	636.406	648.425	576.317	644.408	883.939	1038.27	680.486	679.417	1.00169
ENSMUSG00000024160	Spsb3	0.331443	-0.105451	-0.438451	0.00458313	0.26424	-0.172655	-0.437198	0.00363998	-0.438451	0.00458313	-1.02546	-17.6489	transcription_only	638.534	629.72	562.757	607.23	552.051	486.993	608.927	690.616	-1.02546
ENSMUSG00000030397	Mark4	0.395527	0.0278939	-0.368749	0.00414877	-0.253378	-0.621011	-0.367799	0.00458837	-0.367799	0.00458837	-0.86004	4.03402	transcription_only	827.966	872.879	878.036	845.165	1020.64	969.875	1322.18	1278.78	-0.86004
ENSMUSG00000068882	Ssb	-0.512632	-0.158117	0.353986	0.00462632	1.11347	1.46799	0.35439	0.000220958	0.353986	0.00462632	0.826475	-162.858	transcription_only	2351.94	2119.85	2101.86	1903.48	973.319	1065.93	748.702	670.291	0.826475
ENSMUSG00000103310	Pcdha12	-0.378097	0.167703	0.544398	0.000466673	-4.47082	-3.92502	0.546005	0.00464622	0.546005	0.00464622	1.27378	156.081	transcription_only	321.396	364.739	369.521	391.602	7220.37	7673.79	5810.72	5570.97	1.27378
ENSMUSG00000027255	Arfgap2	0.371175	-0.123002	-0.495854	0.00274391	-0.228447	-0.722624	-0.494626	0.00469692	-0.494626	0.00469692	-1.15158	-18.3344	transcription_only	449.103	489.436	450.883	406.473	577.025	500.822	695.534	689.786	-1.15158
ENSMUSG00000024319	Vps52	0.359412	-0.00881983	-0.369136	0.00472961	0.618692	0.25046	-0.368394	0.00228289	-0.369136	0.00472961	-0.858305	-1.40574	transcription_only	1049.32	994.459	976.349	1043.44	672.648	639.108	810.564	861.507	-0.858305
ENSMUSG00000021700	Rab3c	-0.295786	-0.00988848	0.285537	0.00475672	-0.480635	-0.194737	0.285797	0.000531576	0.285537	0.00475672	0.663215	-178.085	transcription_only	2739.31	2896.09	2803.61	2756.08	3714.19	4011.81	3222.19	3027.93	0.663215
ENSMUSG00000035898	Uba6	-0.240131	0.0533124	0.292902	0.00481241	-0.559272	-0.265829	0.293361	0.00139072	0.292902	0.00481241	0.678841	167.483	transcription_only	2105.04	1954.63	2101.86	2096.8	2902.54	2996.33	2489.54	2470.87	0.678841
ENSMUSG00000019297	Nop9	0.505959	-0.124533	-0.633259	0.00232714	-0.120025	-0.750517	-0.631086	0.00481594	-0.631086	0.00481594	-1.46243	-13.8275	transcription_only	261.799	296.155	233.917	270.156	288.513	305.352	370.171	467.877	-1.46243
ENSMUSG00000001376	Vps50	-0.357753	0.0399014	0.396549	0.00495128	0.564388	0.962043	0.397587	0.00066615	0.396549	0.00495128	0.914157	173.636	transcription_only	1115.31	1094.22	1183.14	1083.1	672.977	798.699	553.083	587.335	0.914157
ENSMUSG00000026209	Dnpep	0.500176	0.120553	-0.380584	0.00497198	1.3789	0.999274	-0.379758	0.000149116	-0.380584	0.00497198	-0.876663	13.5511	transcription_only	1513.33	1617.94	1698.44	1680.42	615.472	566.228	713.591	947.782	-0.876663
ENSMUSG00000007880	Arid1a	-0.315851	-0.016556	0.298708	0.0049776	-0.507825	-0.20853	0.299168	0.000876421	0.298708	0.0049776	0.687919	-176.999	transcription_only	2139.09	2210.25	2074.74	2190.99	3018.54	3060.25	2552.41	2297.49	0.687919
ENSMUSG00000005687	Bcas2	-0.306868	0.0966776	0.402406	0.00402661	-0.70856	-0.305014	0.403361	0.00500788	0.403361	0.00500788	0.927869	162.513	transcription_only	672.59	667.129	755.992	674.15	1071.9	1082.75	886.137	843.671	0.927869
ENSMUSG00000026740	Dnajc1	-0.452825	0.134417	0.585059	0.00425749	-0.116152	0.47109	0.587255	0.00501181	0.587255	0.00501181	1.35069	163.467	transcription_only	321.396	271.216	349.18	304.854	318.415	317.685	240.762	220.665	1.35069
ENSMUSG00000025980	Hspd1	-0.400249	0.00360534	0.402765	0.0050636	-0.212728	0.191126	0.403758	0.000863102	0.402765	0.0050636	0.924563	179.484	transcription_only	1300.48	1106.69	1291.63	1127.71	1194.14	1564.88	963.381	1112.45	0.924563
ENSMUSG00000032500	Dclk3	0.290342	-0.245929	-0.537626	0.00508638	2.99388	2.45761	-0.536526	1.63263e-05	-0.537626	0.00508638	-1.23309	-40.2656	transcription_only	1021.66	1153.45	884.816	929.434	127.169	140.529	146.129	179.187	-1.23309
ENSMUSG00000038708	Golga4	-0.33049	0.0188024	0.348645	0.00509293	0.757358	1.10665	0.349288	0.0006311	0.348645	0.00509293	0.799455	176.744	transcription_only	2060.34	1739.52	1986.6	1863.83	1091.62	1129.84	937.299	816.71	0.799455
ENSMUSG00000025816	Sec61a2	0.352675	0.0104018	-0.343171	0.00509747	0.459242	0.116969	-0.34227	0.00157064	-0.343171	0.00509747	-0.786768	1.68939	transcription_only	1281.33	1315.55	1308.58	1291.29	860.28	997.159	1152.65	1202.46	-0.786768
ENSMUSG00000024785	Rcl1	0.750563	0.0363324	-0.718432	0.00512281	1.80048	1.08625	-0.714304	0.000846889	-0.718432	0.00512281	-1.64556	2.77135	transcription_only	289.469	274.333	274.598	299.897	72.621	87.0832	107.34	159.692	-1.64556
ENSMUSG00000032484	Ngp	0.509083	-0.0576761	-0.568917	0.00514088	0.984988	0.418229	-0.566824	0.00457053	-0.568917	0.00514088	-1.30223	-6.46371	transcription_only	470.387	467.614	562.757	344.51	201.433	265.361	345.426	313.577	-1.30223
ENSMUSG00000074457	S100a16	-0.563305	-0.135722	0.426083	0.0051818	-1.23541	-0.807827	0.427537	0.00124001	0.426083	0.0051818	0.973822	-166.453	transcription_only	932.26	841.705	833.965	780.725	2398.79	1722.23	1486.37	1285	0.973822
ENSMUSG00000023908	Pkmyt1	0.556132	-0.220374	-0.781617	0.00476686	0.997742	0.221236	-0.777261	0.00523261	-0.777261	0.00523261	-1.77315	-21.6166	transcription_only	189.432	180.811	132.214	180.93	99.2378	83.3457	132.085	134.805	-1.77315
ENSMUSG00000036534	Slc38a7	0.410276	-0.0277411	-0.439516	0.00348674	-0.114592	-0.552608	-0.437962	0.00525208	-0.437962	0.00525208	-0.998407	-3.86821	transcription_only	549.14	645.307	555.976	599.795	599.37	666.018	839.322	830.398	-0.998407
ENSMUSG00000008658	Rbfox1	-0.35875	-0.0675934	0.290548	0.00529344	-1.7113	-1.42014	0.291118	0.000417847	0.290548	0.00529344	0.661363	-169.33	transcription_only	2849.99	2727.75	2644.28	2654.46	8328.42	9667.36	6625.63	7310.99	0.661363
ENSMUSG00000027187	Cat	-0.289694	0.0359787	0.325367	0.0053942	2.32603	2.6517	0.325664	1.71094e-06	0.325367	0.0053942	0.737957	172.92	transcription_only	5425.41	5461.73	5363.14	5722.84	972.662	1164.22	836.647	899.252	0.737957
ENSMUSG00000059493	Nhs	-0.622573	-0.0366802	0.583384	0.0040891	-0.787551	-0.201658	0.585402	0.00540636	0.585402	0.00540636	1.32716	-176.628	transcription_only	285.212	342.917	288.158	314.768	462.343	597.622	318.675	365.01	1.32716
ENSMUSG00000010095	Slc3a2	0.411556	0.149471	-0.262238	0.00551377	0.928098	0.666012	-0.262022	0.000277003	-0.262238	0.00551377	-0.592279	19.9602	transcription_only	4676.2	4772.78	4956.33	5445.24	2434.28	2449.54	3075.73	3377.17	-0.592279
ENSMUSG00000029547	Ints1	0.468808	0.00561891	-0.463508	0.00555395	3.92194	3.45875	-0.463321	3.39143e-08	-0.463508	0.00555395	-1.0454	0.686686	transcription_only	2805.29	2805.68	2925.66	2686.68	208.334	155.479	230.061	270.854	-1.0454
ENSMUSG00000034994	Eef2	0.37127	0.0880563	-0.283376	0.00558631	1.16898	0.885764	-0.283174	1.81819e-06	-0.283376	0.00558631	-0.63841	13.3426	transcription_only	16338	17360.9	17198	18387.9	8206.18	6526.75	8693.5	10243.1	-0.63841
ENSMUSG00000031715	Smarca5	-0.377197	0.11383	0.48954	0.00348007	-0.852605	-0.361579	0.490943	0.00560003	0.490943	0.00560003	1.10551	163.207	transcription_only	515.084	395.913	518.685	473.392	793.903	839.811	679.483	569.084	1.10551
ENSMUSG00000001964	Emd	0.400469	-0.0212051	-0.422692	0.00385676	-0.0861088	-0.507783	-0.421967	0.00562365	-0.421967	0.00562365	-0.949419	-3.03102	transcription_only	789.654	707.656	620.388	840.208	752.17	817.012	975.085	1082.17	-0.949419
ENSMUSG00000024939	Fam89b	0.387563	0.0567779	-0.331505	0.00562408	-0.478277	-0.809062	-0.330807	0.00176521	-0.331505	0.00562408	-0.745869	8.33454	transcription_only	1758.1	2122.97	1878.12	2109.2	2960.38	2332.93	3423.16	3458.06	-0.745869
ENSMUSG00000043391	2510009E07Rik	-0.499805	-0.126623	0.371982	0.0056378	-1.29946	-0.926279	0.373172	0.00372283	0.371982	0.0056378	0.836547	-165.784	transcription_only	966.315	907.171	810.234	894.735	2205.25	2341.9	1755.55	1437.23	0.836547
ENSMUSG00000015092	Edf1	0.257262	-0.132851	-0.391361	0.00566657	1.03424	0.644124	-0.390376	0.00100742	-0.391361	0.00566657	-0.879264	-27.3119	transcription_only	1098.28	1084.86	1003.47	979.004	521.491	527.732	558.099	688.127	-0.879264
ENSMUSG00000074637	Sox2	-0.595604	-0.0334776	0.560285	0.00257057	-0.775233	-0.213107	0.561987	0.00567732	0.561987	0.00567732	1.26214	-176.783	transcription_only	344.809	336.682	288.158	369.295	568.153	580.43	388.897	365.84	1.26214
ENSMUSG00000031673	Cdh11	-0.422073	-0.126279	0.295282	0.00568667	0.555263	0.851056	0.295746	0.000452428	0.295282	0.00568667	0.66295	-163.343	transcription_only	3469.37	3083.13	2905.32	3073.33	2083.99	2315.74	1618.45	1642.55	0.66295
ENSMUSG00000029003	Mad2l2	1.0318	0.221635	-0.814831	0.00213802	0.413072	-0.397097	-0.809783	0.00570373	-0.809783	0.00570373	-1.81702	12.1231	transcription_only	142.606	134.049	149.164	171.016	108.767	96.0531	196.956	219.421	-1.81702
ENSMUSG00000036634	Mag	0.576946	0.122565	-0.456174	0.00588009	1.11176	0.657377	-0.454285	0.00203129	-0.456174	0.00588009	-1.01755	11.9935	transcription_only	670.461	607.898	647.509	736.112	325.316	258.26	427.018	438.427	-1.01755
ENSMUSG00000052516	Robo2	-0.430882	-0.109256	0.321119	0.0060032	1.10951	1.43114	0.32152	1.03837e-05	0.321119	0.0060032	0.713403	-165.772	transcription_only	4242	4217.88	3979.98	3826.79	1716.29	2143.44	1336.23	1506.91	0.713403
ENSMUSG00000040472	Rabggta	0.395052	-0.0333816	-0.429474	0.00600881	1.92696	1.49853	-0.428456	0.00108969	-0.429474	0.00600881	-0.953953	-4.82997	transcription_only	955.673	1156.56	932.277	1100.45	265.182	278.442	343.42	366.669	-0.953953
ENSMUSG00000032336	Nptn	-0.353183	-0.105882	0.247003	0.00604555	-0.994303	-0.747002	0.247285	0.000240577	0.247003	0.00604555	0.547992	-163.312	transcription_only	6523.69	6160.03	5712.32	6010.34	12638.4	12245.8	9982.58	9367.49	0.547992
ENSMUSG00000002985	Apoe	0.250024	-0.00278976	-0.25291	0.0060487	3.18315	2.93034	-0.252815	5.42041e-06	-0.25291	0.0060487	-0.561041	-0.639279	transcription_only	110058	114968	106829	116487	13372.1	10995.3	14213.6	14578.8	-0.561041
ENSMUSG00000006281	Tep1	0.396559	0.0180763	-0.379357	0.00612965	2.07055	1.69206	-0.378467	0.000297872	-0.379357	0.00612965	-0.839352	2.60989	transcription_only	1389.88	1430.9	1403.5	1432.57	335.174	324.787	420.999	442.16	-0.839352
ENSMUSG00000005447	Pafah1b3	0.468022	0.00838697	-0.461365	0.00614572	0.890244	0.430609	-0.459696	0.00289432	-0.461365	0.00614572	-1.02027	1.02663	transcription_only	559.782	595.428	586.487	567.574	296.07	315.817	376.859	464.144	-1.02027
ENSMUSG00000075419	Dolk	0.247153	-0.189056	-0.437644	0.00617272	1.15078	0.714568	-0.436442	0.00235232	-0.437644	0.00617272	-0.966985	-37.4136	transcription_only	825.838	875.997	640.729	830.294	347.99	405.142	415.314	472.439	-0.966985
ENSMUSG00000015094	Npdc1	0.331856	0.0289485	-0.303297	0.00620566	0.367007	0.0640997	-0.302973	0.000162818	-0.303297	0.00620566	-0.66944	4.9854	transcription_only	4425.04	5019.06	4539.34	5009.03	4027.68	3158.91	4212.66	4776.24	-0.66944
ENSMUSG00000009863	Sdhb	0.308856	-0.0430064	-0.35238	0.00620589	2.74628	2.39442	-0.351865	1.52378e-05	-0.35238	0.00620589	-0.777772	-7.92715	transcription_only	3626.88	3644.27	3264.67	3735.09	502.433	563.985	581.506	730.85	-0.777772
ENSMUSG00000001833	Sept7	-0.40322	-0.14793	0.255099	0.0062081	0.221915	0.477205	0.255313	0.000252143	0.255099	0.0062081	0.563014	-159.853	transcription_only	5706.37	5514.73	5203.8	4885.11	4653	4819.85	3631.15	3482.94	0.563014
ENSMUSG00000054499	Dedd2	0.546784	-0.138666	-0.688667	0.00222103	-0.100711	-0.786162	-0.685811	0.00627768	-0.685811	0.00627768	-1.51029	-14.2304	transcription_only	210.716	233.807	176.285	220.586	247.109	219.764	345.426	332.242	-1.51029
ENSMUSG00000002635	Pdcd2l	0.39952	-0.157882	-0.56015	0.00482489	0.335839	-0.221563	-0.557764	0.00635205	-0.557764	0.00635205	-1.22545	-21.563	transcription_only	344.809	367.856	271.208	356.903	253.352	301.241	339.073	387.408	-1.22545
ENSMUSG00000025510	Cd151	0.263308	-0.0020719	-0.265548	0.00637874	0.461136	0.195756	-0.26547	9.46918e-05	-0.265548	0.00637874	-0.582948	-0.450836	transcription_only	5523.32	5520.96	5298.73	5655.92	3764.46	4130.28	4325.02	5086.08	-0.582948
ENSMUSG00000021701	Plk2	-0.305001	0.0881895	0.392163	0.00643944	0.202816	0.596006	0.393121	0.00252524	0.392163	0.00643944	0.859289	163.873	transcription_only	832.223	804.296	881.426	852.601	738.697	661.533	555.09	571.158	0.859289
ENSMUSG00000001436	Slc19a1	0.47533	0.0299542	-0.447059	0.00646821	0.496426	0.0510507	-0.445339	0.00498498	-0.447059	0.00646821	-0.978708	3.60588	transcription_only	536.369	573.606	522.075	597.316	407.467	364.404	488.546	578.209	-0.978708
ENSMUSG00000005371	Fbxo11	-0.437638	-0.059667	0.377263	0.00648158	0.757219	1.13519	0.377968	0.000667313	0.377263	0.00648158	0.825572	-172.236	transcription_only	1875.16	1546.24	1739.12	1549.06	879.339	1122.74	724.626	742.879	0.825572
ENSMUSG00000028760	Eif4g3	-0.449342	-0.16072	0.288249	0.00649108	1.15747	1.44609	0.288676	0.000323378	0.288249	0.00649108	0.630598	-160.319	transcription_only	4625.12	4127.47	4057.95	3754.91	1882.89	1986.09	1354.95	1459.63	0.630598
ENSMUSG00000037351	Actr1b	0.239309	-0.0373178	-0.276915	0.00651536	0.397807	0.12118	-0.276643	0.000330471	-0.276915	0.00651536	-0.605352	-8.8633	transcription_only	3909.96	4065.12	3664.7	4042.42	3154.58	2794.51	3269.01	3708.59	-0.605352
ENSMUSG00000002279	Lmf1	0.41983	-0.127825	-0.549794	0.00652612	2.22177	1.67412	-0.547989	0.000496488	-0.549794	0.00652612	-1.20149	-16.9338	transcription_only	598.094	773.122	593.267	641.929	163.972	122.589	189.6	191.63	-1.20149
ENSMUSG00000008489	Elavl2	-0.281716	-0.0360887	0.245295	0.00658885	-1.16661	-0.920978	0.245678	0.000545931	0.245295	0.00658885	0.535036	-172.7	transcription_only	4382.47	4311.4	4227.45	4208.48	9442.71	9767.15	7911.03	7783.84	0.535036
ENSMUSG00000020775	Mrpl38	0.310708	-0.165696	-0.477976	0.00665887	1.89197	1.41557	-0.476663	0.000643134	-0.477976	0.00665887	-1.04036	-28.0704	transcription_only	757.728	779.356	705.141	659.279	219.178	187.621	239.09	262.558	-1.04036
ENSMUSG00000035329	Fbxo33	-0.294588	0.251871	0.544666	0.00277266	-1.25046	-0.704	0.546372	0.00673753	0.546372	0.00673753	1.18645	139.47	transcription_only	287.34	342.917	400.032	344.51	709.452	755.718	535.36	651.626	1.18645
ENSMUSG00000039201	Tbc1d25	0.358621	-0.141595	-0.502322	0.00681054	1.74129	1.24107	-0.500319	0.00121633	-0.502322	0.00681054	-1.08844	-21.5456	transcription_only	585.323	679.599	569.537	565.096	170.544	199.955	223.708	248.041	-1.08844
ENSMUSG00000054874	Pcnx3	0.436755	0.00499467	-0.433458	0.00700358	0.449631	0.0178701	-0.43186	0.00415551	-0.433458	0.00700358	-0.933962	0.655198	transcription_only	630.021	623.485	576.317	669.193	508.347	394.304	608.927	605.585	-0.933962
ENSMUSG00000062963	Ufc1	0.227527	-0.105528	-0.334017	0.00703469	-0.57563	-0.908684	-0.333193	0.00434137	-0.334017	0.00703469	-0.719057	-24.882	transcription_only	1266.43	1125.39	1078.05	1137.63	1763.61	1756.61	1857.88	2236.93	-0.719057
ENSMUSG00000022629	Kif21a	-0.229054	0.0109991	0.239934	0.0071538	0.0409075	0.280961	0.240081	6.78452e-05	0.239934	0.0071538	0.514769	177.251	transcription_only	24257.9	22130.6	23788.3	22725.3	21985.4	22404.7	19892.6	17723.7	0.514769
ENSMUSG00000025495	Ptdss2	0.319487	-0.11732	-0.438441	0.00638009	0.133803	-0.303004	-0.43723	0.00716521	-0.43723	0.00716521	-0.937758	-20.1639	transcription_only	547.011	520.61	498.345	483.306	490.274	468.679	557.096	632.131	-0.937758
ENSMUSG00000049409	Prokr1	-0.656121	-0.130792	0.52318	0.00719706	0.921377	1.44671	0.525262	0.00107954	0.52318	0.00719706	1.12109	-168.726	transcription_only	561.91	545.55	515.295	493.22	264.525	311.706	173.215	189.971	1.12109
ENSMUSG00000002496	Tsc2	0.330532	-0.122448	-0.453803	0.00723075	3.73841	3.28543	-0.453111	5.78832e-07	-0.453803	0.00723075	-0.971509	-20.3274	transcription_only	2166.76	2263.25	1969.65	2067.06	170.544	155.479	184.918	222.739	-0.971509
ENSMUSG00000006134	Crkl	0.569661	0.164316	-0.406832	0.00729353	1.16834	0.762991	-0.405196	0.00290294	-0.406832	0.00729353	-0.869426	16.0899	transcription_only	702.388	760.652	823.794	803.031	320.058	318.433	446.747	494.838	-0.869426
ENSMUSG00000035325	Sec31a	-0.380668	-0.0613145	0.318825	0.00735488	1.5388	1.85815	0.319412	3.51767e-05	0.318825	0.00735488	0.68019	-170.85	transcription_only	3750.33	3494.63	3424	3489.72	1194.47	1263.27	1028.25	845.745	0.68019
ENSMUSG00000018547	Pip4k2b	0.214412	-0.122943	-0.338554	0.00736112	-0.393391	-0.730746	-0.337536	0.00606102	-0.338554	0.00736112	-0.722156	-29.8298	transcription_only	1040.81	978.872	932.277	917.042	1388.01	1226.64	1497.74	1516.45	-0.722156
ENSMUSG00000025512	Chid1	0.263604	-0.174885	-0.440423	0.00738781	0.333713	-0.104776	-0.438846	0.00456812	-0.440423	0.00738781	-0.938755	-33.5618	transcription_only	595.965	623.485	545.806	527.919	479.43	470.922	493.562	640.427	-0.938755
ENSMUSG00000071669	Snx29	-0.315221	0.0662482	0.380224	0.00742882	0.195803	0.577272	0.381496	0.00312764	0.380224	0.00742882	0.809526	168.131	transcription_only	827.966	913.406	918.717	889.778	703.537	787.486	579.166	610.977	0.809526
ENSMUSG00000025212	Sfxn3	0.428005	0.15186	-0.276741	0.00746633	0.165848	-0.110297	-0.276124	0.00233263	-0.276741	0.00746633	-0.588599	19.5352	transcription_only	1928.37	1995.15	2139.15	2188.51	1711.36	1725.97	2229.39	2364.27	-0.588599
ENSMUSG00000032181	Scg3	-0.422724	-0.154974	0.267602	0.00754892	2.70259	2.97034	0.267701	3.18648e-05	0.267602	0.00754892	0.567883	-159.867	transcription_only	26363	24035.4	23520.5	21523.2	3484.5	4138.51	2824.6	2822.19	0.567883
ENSMUSG00000053286	Trmt1l	-0.297804	0.0783631	0.375143	0.00760744	0.595258	0.971424	0.376225	0.00153409	0.375143	0.00760744	0.794838	165.258	transcription_only	1098.28	1010.05	1145.85	1078.14	643.074	734.414	574.819	537.56	0.794838
ENSMUSG00000041939	Mvk	0.458735	0.0731722	-0.386562	0.00761955	0.910298	0.524735	-0.385475	0.00174718	-0.386562	0.00761955	-0.818766	9.06284	transcription_only	1094.02	1119.16	1027.2	1273.94	651.618	505.307	743.352	837.449	-0.818766
ENSMUSG00000004270	Lpcat3	0.42516	0.0301412	-0.39624	0.00770801	0.601856	0.206837	-0.394944	0.0037288	-0.39624	0.00770801	-0.837277	4.05513	transcription_only	776.884	810.531	742.432	860.036	489.617	538.197	616.952	754.078	-0.837277
ENSMUSG00000024231	Cul2	-0.375117	-0.0231183	0.351325	0.00771837	1.21167	1.56366	0.351887	5.8094e-05	0.351325	0.00771837	0.742164	-176.473	transcription_only	2377.48	2397.3	2413.75	2265.34	878.353	1150.77	772.444	780.624	0.742164
ENSMUSG00000036249	Rbm43	-0.496925	0.0806518	0.5748	0.00758353	-0.310578	0.266999	0.577358	0.00777764	0.577358	0.00777764	1.21773	170.781	transcription_only	263.928	277.451	291.549	277.591	290.813	368.889	224.377	239.745	1.21773
ENSMUSG00000024498	Tcerg1	-0.417289	-0.0510466	0.365421	0.00777924	0.760891	1.12713	0.366239	0.000493423	0.365421	0.00777924	0.770696	-173.026	transcription_only	1481.4	1405.96	1396.72	1380.52	787.659	892.136	680.152	568.254	0.770696
ENSMUSG00000033706	Smyd5	0.352931	-0.127702	-0.482743	0.00783047	1.40833	0.927701	-0.480747	0.00324789	-0.482743	0.00783047	-1.01676	-19.8918	transcription_only	617.25	520.61	484.784	552.703	218.192	205.935	277.545	260.485	-1.01676
ENSMUSG00000027950	Chrnb2	0.282578	-0.0329623	-0.316368	0.00790283	0.715753	0.400213	-0.31548	0.00183107	-0.316368	0.00790283	-0.665074	-6.65339	transcription_only	1558.02	1536.89	1505.2	1504.44	984.492	869.711	1137.93	1102.91	-0.665074
ENSMUSG00000044033	Ccdc141	-0.564244	-0.210286	0.352963	0.00790425	0.38748	0.741439	0.353759	0.000601309	0.352963	0.00790425	0.741978	-159.56	transcription_only	1628.26	1583.65	1413.67	1353.26	1259.86	1157.5	899.178	724.213	0.741978
ENSMUSG00000030733	Sh2b1	0.456118	0.0298583	-0.428034	0.00542564	-0.344004	-0.770264	-0.426288	0.00792207	-0.426288	0.00792207	-0.8957	3.74534	transcription_only	504.442	570.489	549.196	537.833	717.338	618.179	881.79	939.072	-0.8957
ENSMUSG00000018411	Mapt	-0.386964	-0.153007	0.233725	0.0079447	-1.48966	-1.2557	0.234006	0.000215654	0.233725	0.0079447	0.490805	-158.426	transcription_only	7839.07	8173.89	7014.12	7289.24	22903.6	21305.1	16981.1	16603	0.490805
ENSMUSG00000032333	Stoml1	0.246852	-0.0732031	-0.320774	0.00795666	0.73053	0.410476	-0.3202	0.000527284	-0.320774	0.00795666	-0.67339	-16.5176	transcription_only	2141.22	2325.6	2023.89	2181.07	1471.81	1169.46	1465.97	1649.18	-0.67339
ENSMUSG00000030304	Ergic2	-0.27184	0.249323	0.519024	0.00458573	-0.982683	-0.46152	0.521269	0.00802282	0.521269	0.00802282	1.09241	137.474	transcription_only	317.139	339.799	427.153	351.946	577.682	696.666	489.549	558.714	1.09241
ENSMUSG00000028962	Slc4a2	0.257548	-0.0336662	-0.292026	0.00808495	0.146841	-0.144373	-0.291242	0.00316611	-0.292026	0.00808495	-0.611013	-7.44736	transcription_only	1647.42	1689.64	1593.35	1643.24	1535.89	1426.59	1757.56	1760.76	-0.611013
ENSMUSG00000039686	Zer1	0.248055	-0.107508	-0.356303	0.00810831	1.7779	1.42234	-0.355514	0.000640096	-0.356303	0.00810831	-0.745055	-23.4321	transcription_only	1568.67	1789.4	1549.28	1539.14	517.877	441.396	554.086	578.209	-0.745055
ENSMUSG00000022894	Adamts5	-0.445171	-0.0439459	0.399684	0.0066705	-1.41381	-1.01259	0.401045	0.00812012	0.401045	0.00812012	0.838359	-174.362	transcription_only	681.103	614.133	674.63	584.924	1588.46	1820.15	1148.63	1338.09	0.838359
ENSMUSG00000033327	Tnxb	0.469534	-0.13244	-0.60293	0.00812755	4.07143	3.46946	-0.60221	4.09235e-06	-0.60293	0.00812755	-1.26015	-15.752	transcription_only	1475.01	1215.8	1386.55	1078.14	87.7367	70.2645	122.722	94.5708	-1.26015
ENSMUSG00000035569	Ankrd11	-0.400589	-0.0679768	0.332046	0.00813537	0.314388	0.647	0.332565	0.00305069	0.332046	0.00813537	0.69385	-170.369	transcription_only	1968.81	1742.64	1969.65	1576.32	1573.35	1370.16	1097.81	1117.84	0.69385
ENSMUSG00000029175	Slc35f6	0.472305	0.143678	-0.329477	0.00825205	1.37169	1.04307	-0.328754	0.00146249	-0.329477	0.00825205	-0.686446	16.9201	transcription_only	1383.49	1387.25	1505.2	1536.66	524.12	529.227	705.9	745.782	-0.686446
ENSMUSG00000020282	Rhbdf1	0.620702	0.0682813	-0.555298	0.00827767	0.719766	0.167344	-0.552395	0.00782515	-0.555298	0.00827767	-1.15618	6.27767	transcription_only	310.753	346.034	393.252	294.94	218.52	171.924	274.87	322.287	-1.15618
ENSMUSG00000029838	Ptn	-0.413792	-0.134047	0.279257	0.0083645	-0.0937296	0.186015	0.279734	0.000366191	0.279257	0.0083645	0.580174	-162.05	transcription_only	3301.22	3323.18	2932.44	3063.41	3207.16	3748.69	2684.83	2499.49	0.580174
ENSMUSG00000040495	Chrm4	1.66322	0.0806929	-1.58569	0.00841061	6.50817	4.92564	-1.58254	5.12939e-15	-1.58569	0.00841061	-3.29057	2.77758	transcription_only	334.166	299.273	328.84	339.553	4.60043	2.24249	10.0317	11.614	-3.29057
ENSMUSG00000007944	Ttc9b	0.397355	-0.255508	-0.655918	0.00847149	-0.19272	-0.845583	-0.653126	1.054e-05	-0.655918	0.00847149	-1.35909	-32.7418	transcription_only	698.131	782.474	566.147	656.8	1025.24	632.007	1152.65	1017.05	-1.35909
ENSMUSG00000026833	Olfm1	-0.417281	-0.159554	0.257407	0.00870456	-0.55548	-0.297753	0.257653	0.00142974	0.257407	0.00870456	0.530323	-159.075	transcription_only	4427.17	3862.49	3688.43	3710.3	5747.58	6271.86	4401.93	4536.91	0.530323
ENSMUSG00000020307	Cdc34	0.628243	0.0953421	-0.534936	0.00414525	-0.627455	-1.16036	-0.532978	0.00874227	-0.532978	0.00874227	-1.09707	8.62935	transcription_only	300.111	417.735	396.642	359.381	611.528	466.063	867.745	787.675	-1.09707
ENSMUSG00000030341	Tnfrsf1a	0.496754	0.0336754	-0.465422	0.00881358	0.40254	-0.0605386	-0.463237	0.00522884	-0.465422	0.00881358	-0.956371	3.8782	transcription_only	468.259	523.728	505.125	500.655	417.982	316.564	465.473	565.351	-0.956371
ENSMUSG00000037190	Cyb561d2	0.446649	-0.0143346	-0.46265	0.00888673	0.795887	0.334903	-0.461048	0.00513524	-0.46265	0.00888673	-0.949015	-1.8382	transcription_only	561.91	626.603	494.955	661.757	302.314	369.263	402.607	506.452	-0.949015
ENSMUSG00000028920	Fbxo42	0.386545	-0.0159789	-0.403868	0.00757825	0.11556	-0.286963	-0.402802	0.0089045	-0.402802	0.0089045	-0.825902	-2.36713	transcription_only	568.296	607.898	559.366	592.359	540.55	524.742	718.607	664.484	-0.825902
ENSMUSG00000028868	Wasf2	0.380583	0.0281383	-0.353424	0.00706326	-0.325773	-0.678218	-0.352479	0.00890771	-0.352479	0.00890771	-0.722664	4.22845	transcription_only	821.581	745.065	793.283	800.553	962.475	976.229	1227.88	1279.19	-0.722664
ENSMUSG00000015095	Fbxw5	0.239501	-0.161164	-0.401874	0.00706147	-0.309931	-0.710597	-0.400794	0.00893149	-0.400794	0.00893149	-0.821258	-33.9373	transcription_only	674.718	770.004	559.366	711.327	931.915	822.245	967.728	1090.47	-0.821258
ENSMUSG00000056185	Snx32	0.268337	-0.163218	-0.43263	0.00893259	2.89233	2.46077	-0.431572	0.000101682	-0.43263	0.00893259	-0.88647	-31.3103	transcription_only	1428.19	1452.72	1172.97	1373.08	187.632	193.975	215.682	240.99	-0.88647
ENSMUSG00000022146	Osmr	-0.350811	-0.0132858	0.337004	0.00898225	1.20374	1.54127	0.337525	0.000703928	0.337004	0.00898225	0.689717	-177.831	transcription_only	1847.49	1670.94	1786.58	1695.29	715.038	792.719	585.854	588.164	0.689717
ENSMUSG00000022614	Lmf2	0.503154	0.0153552	-0.48917	0.00900669	2.8706	2.3828	-0.487958	0.000111775	-0.48917	0.00900669	-1.00057	1.748	transcription_only	896.077	1006.93	972.959	934.391	136.698	118.104	173.215	185.823	-1.00057
ENSMUSG00000037949	Ano10	0.450957	0.142987	-0.308652	0.00907319	0.731659	0.423688	-0.30801	0.00315805	-0.308652	0.00907319	-0.630342	17.5925	transcription_only	1347.31	1430.9	1495.03	1546.58	830.049	812.527	1073.06	1157.66	-0.630342
ENSMUSG00000030847	Bag3	-0.35437	-0.102076	0.252057	0.00907748	1.08962	1.34191	0.252289	3.36836e-05	0.252057	0.00907748	0.514709	-163.931	transcription_only	9397.1	9682.72	8614.24	9044.01	4272.15	4545.89	3660.25	3189.28	0.514709
ENSMUSG00000055660	Mettl4	0.571945	-0.196396	-0.774322	0.00910313	2.01073	1.24238	-0.769372	0.00236109	-0.774322	0.00910313	-1.58024	-18.9515	transcription_only	214.973	215.102	193.236	180.93	48.6331	56.4359	76.2412	78.809	-1.58024
ENSMUSG00000039943	Plcb4	-0.502885	-0.0437424	0.457904	0.00921294	1.6015	2.06065	0.458917	0.000399002	0.457904	0.00921294	0.932109	-175.029	transcription_only	1164.26	935.228	1061.1	981.482	301.328	384.213	236.749	243.478	0.932109
ENSMUSG00000019188	H13	0.374831	0.0903759	-0.285013	0.00922013	0.803175	0.51872	-0.284393	0.000227561	-0.285013	0.00922013	-0.580076	13.5559	transcription_only	3239.5	3223.42	3339.25	3497.15	2030.76	1611.97	2308.3	2385.84	-0.580076
ENSMUSG00000020717	Pecam1	-0.322043	0.162158	0.482392	0.00923902	-0.0432478	0.440953	0.484342	0.00907466	0.482392	0.00923902	0.981367	153.273	transcription_only	383.121	361.621	383.081	443.65	385.122	371.505	313.993	287.031	0.981367
ENSMUSG00000025270	Alas2	0.721817	0.17541	-0.548265	0.00384611	-0.708481	-1.25489	-0.546633	0.00924979	-0.546633	0.00924979	-1.11178	13.6588	transcription_only	368.222	305.508	454.273	314.768	509.99	580.43	1007.52	777.306	-1.11178
ENSMUSG00000022296	Baalc	1.9457	0.0393116	-1.93444	0.00929818	4.52901	2.62262	-1.90778	9.14133e-05	-1.93444	0.00929818	-3.93002	1.15747	transcription_only	59.5965	46.7614	61.0218	49.5698	1.97161	2.61623	6.35343	11.1992	-3.93002
ENSMUSG00000011877	Git1	0.507524	0.100272	-0.408144	0.00930317	1.3991	0.991848	-0.407294	9.17814e-05	-0.408144	0.00930317	-0.829092	11.176	transcription_only	1394.13	1365.43	1457.74	1484.62	636.502	392.435	749.371	705.133	-0.829092
ENSMUSG00000057378	Ryr3	-0.373451	0.208964	0.580509	0.00752628	0.192623	0.775037	0.582435	0.00936192	0.582435	0.00936192	1.18155	150.771	transcription_only	312.882	296.155	437.323	272.634	250.723	274.704	201.972	200.756	1.18155
ENSMUSG00000027716	Trpc3	-0.392407	-0.0854428	0.306459	0.00937422	0.391475	0.69844	0.306857	0.000543599	0.306459	0.00937422	0.621519	-167.716	transcription_only	2247.64	2228.96	2078.13	2116.63	1524.71	1835.1	1233.9	1307.81	0.621519
ENSMUSG00000000738	Spg7	0.360187	-0.0250987	-0.386516	0.00957282	0.704848	0.319563	-0.385458	0.0021251	-0.386516	0.00957282	-0.780361	-3.98607	transcription_only	949.288	916.523	939.058	889.778	646.032	480.639	694.531	743.293	-0.780361
ENSMUSG00000029059	Fam213b	0.419526	0.0425109	-0.378495	0.00958351	-0.435652	-0.812667	-0.37725	0.00880794	-0.378495	0.00958351	-0.763982	5.78607	transcription_only	687.489	698.303	650.899	760.897	1018.99	822.992	1158	1290.81	-0.763982
ENSMUSG00000064215	Ifi27	0.26102	0.0232309	-0.238125	0.00963058	0.497067	0.259278	-0.237834	0.00137804	-0.238125	0.00963058	-0.480142	5.08594	transcription_only	4437.81	4754.07	4447.81	4815.71	3167.07	3232.17	3810.39	3806.06	-0.480142
ENSMUSG00000038260	Trpm4	0.499335	-0.00548351	-0.50747	0.00969636	0.820328	0.31551	-0.505041	0.00822564	-0.50747	0.00969636	-1.02174	-0.629176	transcription_only	361.836	374.091	386.471	344.51	220.492	188.743	280.554	294.497	-1.02174
ENSMUSG00000042178	Armc5	0.361129	-0.0715909	-0.43445	0.00971284	1.00839	0.575673	-0.4327	0.00276067	-0.43445	0.00971284	-0.874397	-11.213	transcription_only	681.103	723.243	698.361	632.015	385.779	298.998	470.823	403.17	-0.874397
ENSMUSG00000029561	Oasl2	-0.469147	-0.0694941	0.398623	0.00980785	1.48517	1.88482	0.39955	0.000331452	0.398623	0.00980785	0.800606	-171.574	transcription_only	1266.43	1290.61	1254.34	1172.33	410.424	488.114	332.719	311.503	0.800606
ENSMUSG00000049659	Aftph	-0.348124	-0.0204432	0.326762	0.00981003	-0.720599	-0.392918	0.32764	0.00780252	0.326762	0.00981003	0.656246	-176.639	transcription_only	981.215	978.872	996.689	929.434	1518.14	1660.56	1224.88	1255.14	0.656246
ENSMUSG00000035735	Dagla	0.359987	-0.15665	-0.519487	0.0098375	0.879567	0.36293	-0.516995	0.00796494	-0.519487	0.0098375	-1.04267	-23.5165	transcription_only	353.322	411.5	355.96	324.682	219.178	187.248	260.825	257.581	-1.04267
ENSMUSG00000033152	Podxl2	0.421732	-0.0630852	-0.486088	0.00998812	2.37651	1.8917	-0.484787	0.000800632	-0.486088	0.00998812	-0.972427	-8.50756	transcription_only	774.755	991.341	762.772	899.692	187.303	144.64	228.389	213.614	-0.972427
ENSMUSG00000002265	Peg3	-0.420692	-0.158708	0.261699	0.00999096	0.979779	1.24176	0.261955	7.46111e-05	0.261699	0.00999096	0.523501	-159.331	transcription_only	6538.59	6443.72	5929.28	5648.48	2970.56	3509.86	2423.33	2383.77	0.523501
ENSMUSG00000063281	Zfp35	-0.510742	0.208887	0.716068	0.00758671	-0.213246	0.506383	0.719744	0.0100852	0.719744	0.0100852	1.43684	157.756	transcription_only	153.248	180.811	227.137	158.623	166.93	211.915	128.741	135.22	1.43684
ENSMUSG00000021192	Golga5	-0.320466	0.125191	0.444218	0.0102668	0.763419	1.20908	0.445568	0.00196357	0.444218	0.0102668	0.883355	158.662	transcription_only	655.562	626.603	688.19	703.891	349.633	395.051	321.684	270.025	0.883355
ENSMUSG00000053931	Cnn3	-0.24906	0.0127903	0.26127	0.0103901	-1.51592	-1.25407	0.261881	0.00258495	0.26127	0.0103901	0.518198	177.06	transcription_only	2505.18	2381.71	2366.29	2535.5	6981.48	6787.26	6084.92	5422.47	0.518198
ENSMUSG00000034168	Irf2bpl	-0.360311	-0.0662766	0.29341	0.010403	0.350131	0.644165	0.293895	0.00279518	0.29341	0.010403	0.581785	-169.577	transcription_only	2039.05	2225.84	1864.55	2163.72	1697.89	1586.18	1299.78	1241.45	0.581785
ENSMUSG00000052997	Uba2	-0.344972	-0.0198279	0.324431	0.0104546	0.628885	0.954029	0.325088	0.000732469	0.324431	0.0104546	0.642598	-176.71	transcription_only	2141.22	1935.92	2095.08	1923.31	1327.55	1273.36	1128.24	905.059	0.642598
ENSMUSG00000026727	Rsu1	-0.291113	0.056525	0.346904	0.0105207	0.661033	1.00867	0.347533	0.000731445	0.346904	0.0105207	0.686161	169.012	transcription_only	1758.1	1558.71	1793.36	1655.63	927.972	1144.04	907.872	772.743	0.686161
ENSMUSG00000020308	Tpgs1	0.376151	-0.0169801	-0.393762	0.0105434	2.63926	2.24613	-0.393037	0.000853761	-0.393762	0.0105434	-0.778476	-2.58467	transcription_only	1696.37	2045.03	1603.52	2044.75	324.002	264.24	374.853	384.09	-0.778476
ENSMUSG00000028128	F3	-0.409322	0.0449789	0.45254	0.0106158	-0.0476117	0.406689	0.454082	0.0054113	0.45254	0.0106158	0.893336	173.729	transcription_only	502.314	501.906	494.955	532.876	567.167	453.356	406.285	357.129	0.893336
ENSMUSG00000025403	Shmt2	0.517004	0.109921	-0.408363	0.0106747	0.990969	0.583885	-0.40728	0.00703123	-0.408363	0.0106747	-0.805145	12.003	transcription_only	640.663	642.19	606.828	760.897	330.902	303.857	437.718	464.973	-0.805145
ENSMUSG00000071647	Eml3	0.604376	0.0797768	-0.527188	0.00980045	0.627648	0.103049	-0.524522	0.010681	-0.524522	0.010681	-1.03404	7.51949	transcription_only	308.625	293.038	322.059	312.29	205.048	178.651	273.866	306.111	-1.03404
ENSMUSG00000031617	Tmem184c	-0.45622	-0.0125306	0.442636	0.0107217	1.04252	1.48621	0.443655	2.64208e-05	0.442636	0.0107217	0.871876	-178.427	transcription_only	1417.55	1371.67	1366.21	1385.48	531.349	803.557	413.642	552.493	0.871876
ENSMUSG00000060257	Scrt2	0.299423	-0.0149582	-0.315368	0.0107961	-0.616368	-0.93075	-0.314357	0.00842953	-0.315368	0.0107961	-0.620244	-2.85993	transcription_only	1053.58	1187.74	1057.71	1135.15	1752.76	1613.84	2202.3	1912.98	-0.620244
ENSMUSG00000015656	Hspa8	-0.358853	-0.0877119	0.270974	0.010825	1.08513	1.35627	0.27114	0.0020931	0.270974	0.010825	0.532619	-166.265	transcription_only	3875.9	4579.5	3725.72	4153.95	1966.35	1944.61	1489.38	1540.09	0.532619
ENSMUSG00000021062	Rab15	0.418222	-0.00536268	-0.425225	0.00518805	-2.25476	-2.67834	-0.423696	0.0109215	-0.423696	0.0109215	-0.831171	-0.734639	transcription_only	581.066	473.849	552.586	503.134	2197.36	2793.76	3227.21	3394.59	-0.831171
ENSMUSG00000025525	Apool	-0.335901	0.309464	0.642507	0.0109247	0.611699	1.25706	0.64533	0.00548232	0.642507	0.0109247	1.26033	137.346	transcription_only	251.157	224.455	240.697	342.032	137.356	170.429	116.034	126.094	1.26033
ENSMUSG00000036678	Aaas	0.657399	0.143164	-0.517127	0.0109267	0.931348	0.417113	-0.514374	0.00955581	-0.517127	0.0109267	-1.01435	12.2857	transcription_only	344.809	299.273	345.79	364.338	171.859	162.206	243.771	279.979	-1.01435
ENSMUSG00000039630	Hnrnpu	-0.294279	-0.0405692	0.253494	0.0109632	0.673459	0.927168	0.253704	7.61133e-05	0.253494	0.0109632	0.496863	-172.151	transcription_only	7123.92	6858.34	6861.56	6672.1	4282.67	4348.93	3792.33	3197.99	0.496863
ENSMUSG00000036103	Colec12	-0.401579	0.258229	0.657389	0.0112499	1.75138	2.41119	0.659895	0.000401652	0.657389	0.0112499	1.28115	147.258	transcription_only	410.79	330.447	467.834	423.822	113.696	104.649	77.2444	87.1047	1.28115
ENSMUSG00000050965	Prkca	-0.398276	-0.161036	0.236947	0.0112725	-0.559077	-0.321837	0.237211	0.00107851	0.236947	0.0112725	0.461569	-157.985	transcription_only	5497.78	5156.22	4915.64	4582.73	7645.58	7816.93	6052.82	5599.59	0.461569
ENSMUSG00000031561	Tenm3	-0.524002	-0.15532	0.367897	0.0112884	1.33747	1.70615	0.368643	0.000456979	0.367897	0.0112884	0.716431	-163.49	transcription_only	1485.66	1490.13	1295.02	1358.21	566.181	592.39	436.715	362.936	0.716431
ENSMUSG00000033965	Slc16a2	0.300441	-0.147474	-0.449963	0.0113247	1.314	0.866086	-0.448009	0.00186807	-0.449963	0.0113247	-0.875616	-26.1446	transcription_only	696.003	707.656	627.168	632.015	246.78	308.716	294.599	384.92	-0.875616
ENSMUSG00000034349	Smc4	-0.485774	0.0222622	0.506257	0.0113813	1.80097	2.309	0.508014	0.000178375	0.506257	0.0113813	0.984066	177.376	transcription_only	785.397	748.182	789.893	763.375	197.818	236.208	140.779	167.158	0.984066
ENSMUSG00000028487	Bnc2	-0.626429	-0.187339	0.437316	0.0113841	0.937565	1.37665	0.438872	0.00248245	0.437316	0.0113841	0.850012	-163.35	transcription_only	757.728	682.716	630.559	632.015	357.848	384.96	247.45	230.205	0.850012
ENSMUSG00000026956	Uap1l1	0.282031	-0.184384	-0.468683	0.0115091	0.0789889	-0.387426	-0.466793	0.00906453	-0.468683	0.0115091	-0.908756	-33.1756	transcription_only	466.13	467.614	362.741	448.607	510.319	358.424	508.275	542.123	-0.908756
ENSMUSG00000017664	Slc35c2	0.287733	-0.263256	-0.553081	0.00365305	-1.34255	-1.89354	-0.551742	0.0115096	-0.551742	0.0115096	-1.0698	-42.4564	transcription_only	287.34	352.269	240.697	282.548	866.195	717.222	948.334	972.669	-1.0698
ENSMUSG00000040356	Skiv2l	0.310685	-0.0184966	-0.329659	0.0115785	2.1367	1.80752	-0.329146	0.000316432	-0.329659	0.0115785	-0.638334	-3.40707	transcription_only	2171.02	2422.24	2264.59	2233.12	560.924	463.073	600.567	661.996	-0.638334
ENSMUSG00000034748	Sirt6	0.773475	0.0735861	-0.703901	0.011628	2.48155	1.78166	-0.700185	0.000934135	-0.703901	0.011628	-1.36169	5.43459	transcription_only	300.111	277.451	281.378	322.204	51.5905	50.4559	71.8941	101.622	-1.36169
ENSMUSG00000027750	Postn	-0.490372	-0.0321334	0.457692	0.0117654	2.92432	3.38256	0.45806	3.62724e-06	0.457692	0.0117654	0.883068	-176.251	transcription_only	1694.24	1692.76	1698.44	1601.11	206.691	232.471	158.501	151.811	0.883068
ENSMUSG00000032557	Uba5	-0.365799	0.0606596	0.424779	0.0118088	-0.293312	0.133146	0.426294	0.00417516	0.424779	0.0118088	0.818887	170.584	transcription_only	644.92	589.193	650.899	634.494	652.932	840.932	507.272	644.16	0.818887
ENSMUSG00000037605	Adgrl3	-0.386554	-0.072004	0.313562	0.0118972	-0.117381	0.19717	0.314376	0.00448711	0.313562	0.0118972	0.603468	-169.448	transcription_only	1368.59	1284.38	1308.58	1211.98	1455.05	1381.74	1142.62	1012.49	0.603468
ENSMUSG00000020464	Pnpt1	-0.626395	-0.15818	0.466528	0.0119509	1.24673	1.71495	0.467909	0.000816498	0.466528	0.0119509	0.896947	-165.828	transcription_only	751.342	776.239	694.97	666.714	277.997	355.06	199.297	207.807	0.896947
ENSMUSG00000019432	Ddx39b	0.279434	0.019912	-0.259998	0.0119863	0.884987	0.625465	-0.259615	0.00104024	-0.259998	0.0119863	-0.499537	4.07592	transcription_only	3096.89	2992.73	3034.14	3108.03	1719.57	1526.76	1907.03	2007.97	-0.499537
ENSMUSG00000025137	Pcyt2	0.323148	-0.00678544	-0.331029	0.0120537	0.281185	-0.0487489	-0.329928	0.0101102	-0.331029	0.0120537	-0.635204	-1.20292	transcription_only	1072.74	963.285	908.547	1102.93	862.58	790.85	1041.29	1013.73	-0.635204
ENSMUSG00000071324	Armc2	-0.632408	0.46065	1.08404	0.00854388	-0.356316	0.736743	1.09427	0.0122547	1.09427	0.0122547	2.09192	143.93	transcription_only	61.725	49.8788	74.5822	79.3117	71.6352	70.2645	50.1587	40.6489	2.09192
ENSMUSG00000058571	Gpc6	-0.257071	0.0985336	0.35441	0.0122591	-0.259008	0.0965966	0.355394	0.0108304	0.35441	0.0122591	0.677469	159.028	transcription_only	725.801	676.481	728.871	765.854	830.377	824.861	699.547	676.098	0.677469
ENSMUSG00000038291	Snx25	-0.351928	0.171513	0.521153	0.00780725	-0.458287	0.0651542	0.523156	0.0123138	0.523156	0.0123138	0.999022	154.018	transcription_only	308.625	264.981	335.62	312.29	379.207	401.031	311.653	295.326	0.999022
ENSMUSG00000021810	Ecd	-0.26272	0.0863077	0.347999	0.0123307	1.00929	1.35832	0.348887	0.00173578	0.347999	0.0123307	0.664333	161.814	transcription_only	1164.26	1187.74	1234	1246.68	566.181	582.673	496.571	454.189	0.664333
ENSMUSG00000021497	Txndc15	0.305089	-0.0291586	-0.335125	0.0123394	0.822516	0.488269	-0.334244	0.00499518	-0.335125	0.0123394	-0.639656	-5.45941	transcription_only	1183.42	1084.86	1033.98	1174.8	613.829	651.816	722.62	830.813	-0.639656
ENSMUSG00000050860	Phospho1	0.420209	-0.123481	-0.546714	0.00845181	-0.429195	-0.972885	-0.544042	0.0123481	-0.544042	0.0123481	-1.03825	-16.3757	transcription_only	306.497	277.451	247.477	285.026	455.771	319.928	492.224	540.049	-1.03825
ENSMUSG00000106379	Lhfpl3	-0.634344	-0.210322	0.422214	0.0103156	-1.05847	-0.634443	0.423744	0.0123849	0.423744	0.0123849	0.808125	-161.657	transcription_only	547.011	567.372	413.592	535.354	1011.11	1270.74	709.244	750.345	0.808125
ENSMUSG00000036955	Kif1bp	-0.335889	-0.0380055	0.297353	0.01247	1.48507	1.78295	0.297929	0.000204879	0.297353	0.01247	0.566199	-173.544	transcription_only	2977.7	2998.96	2939.22	2852.74	970.033	1130.96	854.035	798.46	0.566199
ENSMUSG00000031785	Adgrg1	0.279863	0.0437206	-0.236329	0.0125568	1.13012	0.893974	-0.236151	0.000498788	-0.236329	0.0125568	-0.449291	8.87907	transcription_only	6576.9	7117.08	6810.71	7197.54	3258.42	2887.95	3797.35	3616.09	-0.449291
ENSMUSG00000026185	Igfbp5	-0.299405	-0.0669352	0.2322	0.0127029	-0.607382	-0.374912	0.23238	0.00174013	0.2322	0.0127029	0.440274	-167.398	transcription_only	4386.73	4551.44	4403.74	4087.03	6844.12	6542.08	5375.67	5429.53	0.440274
ENSMUSG00000028270	Gbp2	-0.78151	-0.167421	0.612149	0.0127797	1.63217	2.24626	0.613735	0.00112947	0.612149	0.0127797	1.15909	-167.908	transcription_only	653.434	427.087	511.905	458.521	201.104	145.388	99.6486	100.793	1.15909
ENSMUSG00000024130	Abca3	0.347684	0.0903279	-0.257474	0.0128175	2.77888	2.52153	-0.257455	8.79469e-05	-0.257474	0.0128175	-0.487191	14.5634	transcription_only	6044.79	6147.56	6597.13	6315.19	891.169	855.882	1057.01	1151.86	-0.487191
ENSMUSG00000019302	Atp6v0a1	0.358759	0.0932428	-0.26566	0.0130853	0.306147	0.040631	-0.26551	5.26179e-05	-0.26566	0.0130853	-0.500295	14.5691	transcription_only	7192.03	7516.11	7488.73	8087.32	6690.01	5000.37	7752.86	7143.83	-0.500295
ENSMUSG00000036371	Serbp1	-0.318471	-0.0717598	0.246264	0.013133	-0.105904	0.140807	0.246653	0.0022717	0.246264	0.013133	0.46338	-167.302	transcription_only	2933	3067.55	2827.34	2842.83	3149.32	3196.66	2575.15	2479.17	0.46338
ENSMUSG00000070583	Fv1	1.89267	0.168681	-1.73733	0.0132445	5.68939	3.9654	-1.72369	1.08297e-07	-1.73733	0.0132445	-3.26264	5.09291	transcription_only	108.551	127.814	142.384	121.446	2.95742	1.49499	9.02856	7.46612	-3.26264
ENSMUSG00000003808	Farsa	0.251542	-0.111945	-0.364718	0.013585	1.08312	0.719637	-0.363521	0.00491025	-0.364718	0.013585	-0.680907	-23.9908	transcription_only	917.361	866.644	813.624	830.294	437.369	392.435	470.823	511.014	-0.680907
ENSMUSG00000029686	Cul1	-0.332588	0.00417561	0.336379	0.0136017	2.40934	2.74611	0.336788	5.78725e-05	0.336379	0.0136017	0.627821	179.281	transcription_only	2892.56	2659.16	2759.54	2788.3	477.787	553.146	400.601	412.296	0.627821
ENSMUSG00000103092	Pcdha5	-0.37276	0.351222	0.722277	0.000868342	-5.8532	-5.12922	0.724581	0.0136354	0.724581	0.0136354	1.35158	136.704	transcription_only	123.45	140.284	169.505	163.58	7232.2	7684.62	5835.46	5605.81	1.35158
ENSMUSG00000032867	Fbxw8	0.418547	0.134384	-0.284695	0.0136871	0.655959	0.371795	-0.284217	0.00457458	-0.284695	0.0136871	-0.530584	17.8004	transcription_only	1630.39	1873.57	1922.19	1888.61	1157.99	1020.33	1455.61	1437.23	-0.530584
ENSMUSG00000036879	Phkb	-0.436717	0.0699405	0.504345	0.0136959	-0.437552	0.069105	0.506487	0.013629	0.504345	0.0136959	0.939802	170.901	transcription_only	357.579	280.568	332.23	339.553	373.949	484.751	289.917	340.123	0.939802
ENSMUSG00000028033	Kcnq5	-0.682396	-0.173343	0.506274	0.0137447	-0.463386	0.0456665	0.508629	0.0129374	0.506274	0.0137447	0.942614	-165.747	transcription_only	370.35	314.86	291.549	314.768	412.067	523.62	263.5	315.651	0.942614
ENSMUSG00000026657	Frmd4a	-0.454869	-0.138244	0.31561	0.0138401	-0.952934	-0.636309	0.316485	0.0116974	0.31561	0.0138401	0.586676	-163.095	transcription_only	993.985	944.58	857.695	894.735	1757.04	1942.37	1382.04	1297.86	0.586676
ENSMUSG00000024958	Gpr137	0.393965	-0.0507432	-0.446176	0.00448002	-1.74723	-2.19194	-0.44489	0.0143363	-0.44489	0.0143363	-0.820183	-7.33936	transcription_only	419.304	442.674	369.521	451.085	1475.09	1365.67	1800.7	1908.01	-0.820183
ENSMUSG00000040797	Iqsec3	0.430341	0.0219774	-0.410097	0.0101171	-0.00327864	-0.411642	-0.408493	0.0143891	-0.408493	0.0143891	-0.752431	2.92354	transcription_only	512.956	458.262	491.564	493.22	495.532	466.063	635.009	652.456	-0.752431
ENSMUSG00000005881	Ergic3	0.248764	-0.0466246	-0.296258	0.0143911	0.458613	0.163225	-0.295484	0.00445821	-0.296258	0.0143911	-0.54568	-10.6155	transcription_only	1581.44	1596.12	1427.23	1620.93	1219.11	1054.34	1274.7	1409.85	-0.54568
ENSMUSG00000045038	Prkce	-0.357792	-0.118232	0.238985	0.0144294	-1.78109	-1.54153	0.239468	0.00404567	0.238985	0.0144294	0.439912	-161.714	transcription_only	2739.31	2680.99	2474.77	2493.36	8784.19	9557.47	7207.14	7007.37	0.439912
ENSMUSG00000035011	Zbtb7a	-0.341363	-0.0614245	0.279277	0.0144604	-0.534841	-0.254903	0.280004	0.00243632	0.279277	0.0144604	0.51382	-169.799	transcription_only	2202.94	2450.3	2132.37	2282.69	3500.93	3111.82	2388.56	2797.72	0.51382
ENSMUSG00000045665	Mfsd5	0.355217	0.039219	-0.317041	0.0145384	-0.248067	-0.564064	-0.315994	0.0129605	-0.317041	0.0145384	-0.582558	6.30044	transcription_only	876.921	938.345	881.426	964.133	1063.03	1052.85	1252.3	1436.81	-0.582558
ENSMUSG00000033487	Fndc3a	0.270538	-0.0802182	-0.351856	0.0145746	1.00463	0.653871	-0.351029	0.00640553	-0.351856	0.0145746	-0.64615	-16.5158	transcription_only	900.334	894.701	874.646	817.902	417.982	462.7	529.676	525.117	-0.64615
ENSMUSG00000070544	Top1	-0.368104	-0.0521817	0.314951	0.0145939	0.177972	0.493894	0.315893	0.0062825	0.314951	0.0145939	0.578196	-171.932	transcription_only	1211.09	1150.33	1186.53	1088.06	983.834	1073.78	799.53	783.527	0.578196
ENSMUSG00000068923	Syt11	-0.231341	-0.0276001	0.2036	0.0146067	-1.61493	-1.41119	0.203703	0.000112513	0.2036	0.0146067	0.373698	-173.196	transcription_only	24517.6	23926.2	23147.6	24108.3	72644.7	73376	59315.7	64233.1	0.373698
ENSMUSG00000043843	Tmem145	0.696614	0.0133003	-0.689071	0.0146479	0.946026	0.262712	-0.68341	0.0114812	-0.689071	0.0146479	-1.26391	1.0938	transcription_only	187.303	190.163	227.137	156.145	118.297	74.002	172.212	137.708	-1.26391
ENSMUSG00000029185	Fam114a1	-0.28593	0.113393	0.397765	0.0147414	0.228757	0.628081	0.399349	0.0109387	0.397765	0.0147414	0.728492	158.368	transcription_only	519.341	611.015	589.877	617.144	473.844	469.427	392.575	375.795	0.728492
ENSMUSG00000021087	Rtn1	-0.24875	-0.0424068	0.206273	0.0147497	-0.657814	-0.45147	0.206331	0.000228042	0.206273	0.0147497	0.37773	-170.325	transcription_only	22299.8	23290.3	21337.3	22655.9	34693.1	36059.2	28547.7	30595.7	0.37773
ENSMUSG00000015377	Dennd6b	0.396768	-0.0999	-0.499526	0.0148929	0.797227	0.300559	-0.496957	0.0101034	-0.499526	0.0148929	-0.912644	-14.1324	transcription_only	353.322	395.913	359.351	334.596	224.435	197.712	313.325	238.501	-0.912644
ENSMUSG00000022012	Enox1	-0.568321	-0.175996	0.390525	0.0149762	-0.994112	-0.601787	0.392166	0.0141653	0.390525	0.0149762	0.712551	-162.793	transcription_only	593.837	548.667	508.515	500.655	998.622	1247.94	789.498	714.258	0.712551
ENSMUSG00000041781	Cpsf2	-0.292243	0.0067744	0.298271	0.0149948	0.400684	0.699701	0.298912	0.00449186	0.298271	0.0149948	0.544065	178.672	transcription_only	1549.51	1549.36	1654.37	1452.4	1126.12	1183.66	979.432	893.445	0.544065
ENSMUSG00000026032	Ndufb3	-0.395534	-0.0291496	0.365121	0.00746026	-2.07206	-1.70568	0.366299	0.0150631	0.366299	0.0150631	0.667429	-175.785	transcription_only	600.222	695.186	637.339	619.623	2564.08	2767.6	1968.23	2057.33	0.667429
ENSMUSG00000060803	Gstp1	0.329794	-0.0785395	-0.409933	0.0150631	0.75555	0.347217	-0.408675	0.0106364	-0.409933	0.0150631	-0.746932	-13.3953	transcription_only	651.305	710.773	532.246	736.112	432.769	358.424	457.782	530.924	-0.746932
ENSMUSG00000066306	Numa1	-0.417187	-0.0822199	0.334441	0.015079	1.90157	2.23654	0.334976	1.17129e-05	0.334441	0.015079	0.609228	-168.851	transcription_only	3556.64	3694.15	3447.73	3360.83	1010.45	896.62	819.927	598.119	0.609228
ENSMUSG00000049303	Syt12	0.411241	-0.0971769	-0.511232	0.0154717	1.37895	0.870532	-0.5086	0.0072225	-0.511232	0.0154717	-0.925567	-13.2952	transcription_only	366.093	414.618	366.131	356.903	161.015	132.68	194.95	193.289	-0.925567
ENSMUSG00000056947	Mab21l1	-0.547548	0.214999	0.7577	0.015484	1.13173	1.89427	0.762383	0.00262318	0.7577	0.015484	1.37153	158.562	transcription_only	176.661	199.515	213.576	218.107	79.5217	88.5782	60.1904	53.922	1.37153
ENSMUSG00000018736	Ndel1	0.444047	0.15044	-0.294232	0.0156222	-0.494538	-0.788146	-0.293527	0.00641204	-0.294232	0.0156222	-0.531458	18.716	transcription_only	1551.64	1424.66	1773.02	1531.71	1885.52	2251.83	2550.74	3038.71	-0.531458
ENSMUSG00000022023	Wbp4	-0.294962	0.0118532	0.305828	0.0156351	-0.716775	-0.409959	0.3067	0.0126603	0.305828	0.0156351	0.552294	177.699	transcription_only	947.159	963.285	966.178	949.262	1506.97	1580.58	1299.44	1199.56	0.552294
ENSMUSG00000021065	Fut8	-0.365327	0.0274523	0.391293	0.0156665	0.251431	0.64421	0.392584	0.0071143	0.391293	0.0156665	0.706295	175.703	transcription_only	738.571	632.837	667.85	726.198	508.676	631.633	439.056	439.671	0.706295
ENSMUSG00000056201	Cfl1	0.2655	0.0544891	-0.211173	0.0157596	0.0946487	-0.116362	-0.211004	0.00254489	-0.211173	0.0157596	-0.380629	11.5979	transcription_only	6657.79	7001.74	6658.16	7418.12	6227.99	6348.85	7533.84	7481.88	-0.380629
ENSMUSG00000030237	Slco1a4	0.545374	0.0740951	-0.473705	0.0157963	0.897007	0.425728	-0.47132	0.0129092	-0.473705	0.0157963	-0.853354	7.73689	transcription_only	412.919	342.917	369.521	423.822	192.561	209.672	265.507	317.725	-0.853354
ENSMUSG00000056665	Them6	0.446159	-0.0353778	-0.481746	0.0158274	0.260614	-0.220922	-0.481508	2.67391e-09	-0.481746	0.0158274	-0.867428	-4.53373	transcription_only	4452.71	4635.61	4047.78	4743.83	4470.3	2984	5026.24	5067.42	-0.867428
ENSMUSG00000025486	Sirt3	0.356246	-0.202481	-0.562044	0.00972205	-0.189939	-0.748666	-0.559264	0.0158287	-0.559264	0.0158287	-1.00699	-29.6128	transcription_only	244.772	293.038	216.966	242.892	280.955	318.807	331.047	431.79	-1.00699
ENSMUSG00000041740	Rnf10	0.359612	0.0518987	-0.308627	0.0142859	-1.39147	-1.69919	-0.307694	0.0159007	-0.307694	0.0159007	-0.553414	8.21213	transcription_only	900.334	854.175	871.256	936.87	2264.73	2272.39	2647.04	3136.18	-0.553414
ENSMUSG00000029088	Kcnip4	-0.552156	-0.23291	0.31823	0.0159533	-1.63412	-1.31488	0.31922	0.00391861	0.31823	0.0159533	0.571906	-157.129	transcription_only	1362.21	1334.26	1115.34	1164.89	3490.08	4754.44	2764.41	2817.63	0.571906
ENSMUSG00000021266	Wars	0.338186	0.0850665	-0.253433	0.0160081	0.98964	0.73652	-0.253175	0.00185047	-0.253433	0.0160081	-0.455079	14.1191	transcription_only	3126.69	3235.89	3169.74	3521.94	1677.84	1471.07	1919.74	2035.76	-0.455079
ENSMUSG00000033863	Klf9	-0.359128	-0.0359783	0.321871	0.0160325	-1.87154	-1.54839	0.32304	0.00991951	0.321871	0.0160325	0.577758	-174.279	transcription_only	921.618	981.989	894.986	944.305	3317.24	3521.45	2318.67	2977.74	0.577758
ENSMUSG00000000197	Nalcn	-0.530441	-0.174477	0.354761	0.0162717	0.491969	0.847934	0.355934	0.00488659	0.354761	0.0162717	0.634513	-161.793	transcription_only	985.471	966.402	894.986	830.294	662.462	704.14	505.265	433.864	0.634513
ENSMUSG00000032875	Arhgef17	0.231422	-0.0515413	-0.283353	0.0162833	1.61098	1.32802	-0.283103	0.000576251	-0.283353	0.0162833	-0.506708	-12.5557	transcription_only	2849.99	3048.84	2786.66	2860.18	1053.5	842.053	1111.18	1100.42	-0.506708
ENSMUSG00000015290	Ubl4a	0.248182	-0.070139	-0.319348	0.0142918	-0.838128	-1.15645	-0.318412	0.0162969	-0.318412	0.0162969	-0.569288	-15.7809	transcription_only	847.122	807.413	789.893	780.725	1365.67	1550.31	1666.94	1772.37	-0.569288
ENSMUSG00000032123	Dpagt1	0.319017	-0.0455227	-0.36595	0.0137111	-0.098197	-0.462736	-0.364689	0.0163045	-0.364689	0.0163045	-0.651951	-8.12111	transcription_only	634.278	582.959	586.487	589.881	616.129	670.129	767.428	826.25	-0.651951
ENSMUSG00000025279	Dnase1l3	0.336752	-0.207921	-0.54816	0.0163048	1.43776	0.893091	-0.544957	0.00849273	-0.54816	0.0163048	-0.979936	-31.6925	transcription_only	336.295	333.565	261.038	312.29	115.997	127.448	148.135	157.203	-0.979936
ENSMUSG00000027968	Larp7	-0.421655	0.238287	0.656357	0.0123439	-0.0736197	0.586321	0.660066	0.0165365	0.660066	0.0165365	1.17595	150.528	transcription_only	187.303	155.871	244.087	166.059	187.632	170.055	127.737	137.708	1.17595
ENSMUSG00000042712	Tceal9	-0.2825	0.118588	0.399761	0.00763682	-1.86197	-1.46088	0.401055	0.0166391	0.401055	0.0166391	0.713424	157.228	transcription_only	491.672	442.674	518.685	495.698	1573.68	1782.4	1356.29	1383.72	0.713424
ENSMUSG00000017760	Ctsa	0.299696	0.0203322	-0.279634	0.0169426	1.9407	1.66133	-0.279301	0.000294859	-0.279634	0.0169426	-0.495238	3.88117	transcription_only	3516.2	3401.11	3376.54	3596.29	977.262	796.082	1026.92	1142.73	-0.495238
ENSMUSG00000045374	Wdr81	0.444966	0.0907439	-0.35556	0.0170451	1.23279	0.878568	-0.354255	0.006022	-0.35556	0.0170451	-0.628773	11.5265	transcription_only	830.095	826.118	871.256	882.343	359.491	333.757	444.74	493.178	-0.628773
ENSMUSG00000025745	Hadha	0.235515	-0.0262312	-0.262162	0.0170515	2.58686	2.32511	-0.261788	0.000201949	-0.262162	0.0170515	-0.463565	-6.3553	transcription_only	4748.57	4579.5	4617.32	4503.42	760.056	768.799	837.65	950.686	-0.463565
ENSMUSG00000024601	Isoc1	0.440503	0.0345291	-0.408034	0.0171197	0.857828	0.451854	-0.406073	0.00899773	-0.408034	0.0171197	-0.720794	4.482	transcription_only	542.754	592.311	583.097	570.053	294.756	319.554	365.49	462.899	-0.720794
ENSMUSG00000031904	Slc7a6	0.534722	0.200416	-0.335439	0.0171291	0.365696	0.0313892	-0.334151	0.014318	-0.335439	0.0171291	-0.592474	20.5462	transcription_only	698.131	723.243	833.965	790.639	511.633	572.581	794.514	764.862	-0.592474
ENSMUSG00000068739	Sars	0.317999	0.059548	-0.258716	0.0171476	1.89144	1.63299	-0.258536	0.000481319	-0.258716	0.0171476	-0.456839	10.6063	transcription_only	4318.62	4055.77	4207.11	4473.68	1208.93	1013.98	1368.33	1385.38	-0.456839
ENSMUSG00000057329	Bcl2	-0.620658	-0.0662173	0.552611	0.00335154	-2.79624	-2.2418	0.553833	0.0172337	0.553833	0.0172337	0.976752	-173.91	transcription_only	251.157	243.159	220.356	247.849	1689.01	1693.45	1095.8	1089.22	0.976752
ENSMUSG00000053644	Aldh7a1	0.299496	-0.0186642	-0.319239	0.0172423	1.12154	0.803378	-0.318328	0.00431355	-0.319239	0.0172423	-0.562947	-3.566	transcription_only	1249.4	1240.74	1267.9	1182.24	553.037	573.329	630.328	747.026	-0.562947
ENSMUSG00000057396	Zfp759	-0.815419	0.449973	1.25263	0.0172631	0.429543	1.69494	1.26697	0.00743753	1.25263	0.0172631	2.20823	151.109	transcription_only	48.9543	49.8788	81.3624	54.5268	32.203	39.991	22.4042	18.2505	2.20823
ENSMUSG00000002028	Kmt2a	-0.257591	0.0441062	0.300936	0.0173455	0.00229964	0.303997	0.30154	0.00984162	0.300936	0.0173455	0.529893	170.284	transcription_only	1274.94	1215.8	1396.72	1172.33	1237.19	1212.81	1066.71	968.521	0.529893
ENSMUSG00000028565	Nfia	-0.539556	-0.236758	0.301933	0.0118192	-2.42021	-2.11741	0.302502	0.0173555	0.302502	0.0173555	0.532573	-156.308	transcription_only	1106.79	1075.51	823.794	1008.75	5704.86	5797.57	3827.44	4032.95	0.532573
ENSMUSG00000063576	Klhdc3	0.307021	-0.0230379	-0.331193	0.0119706	-1.49278	-1.82284	-0.330254	0.0173595	-0.330254	0.0173595	-0.581401	-4.29125	transcription_only	719.415	773.122	708.531	746.026	2206.89	1913.59	2504.59	2560.46	-0.581401
ENSMUSG00000020496	Rnf187	0.242011	0.00206519	-0.240146	0.0173814	-0.792082	-1.03203	-0.239922	0.00558247	-0.240146	0.0173814	-0.422637	0.488921	transcription_only	6153.34	7410.12	6295.41	7172.75	12435	10625.3	13543.9	13551.4	-0.422637
ENSMUSG00000027810	Eif2a	-0.50326	-0.0802468	0.421998	0.0175244	1.8102	2.23322	0.422962	0.000359594	0.421998	0.0175244	0.741179	-170.94	transcription_only	1145.11	1056.81	1027.2	1048.4	276.354	343.474	201.638	232.694	0.741179
ENSMUSG00000022321	Cdh10	-0.558301	-0.0584733	0.497382	0.0175503	0.714735	1.21456	0.49969	0.00536735	0.497382	0.0175503	0.873261	-174.021	transcription_only	421.433	430.205	420.372	394.08	226.078	284.422	165.858	178.357	0.873261
ENSMUSG00000034445	Cyb561a3	0.773139	-0.0366752	-0.817252	0.017744	1.64939	0.839579	-0.81039	0.0129165	-0.817252	0.017744	-1.43097	-2.71589	transcription_only	108.551	149.636	111.873	133.839	41.0753	38.8698	64.8719	70.9281	-1.43097
ENSMUSG00000020919	Stat5b	0.454824	0.0772181	-0.378906	0.00906211	-1.03564	-1.41325	-0.377798	0.0177675	-0.377798	0.0177675	-0.661289	9.63555	transcription_only	517.213	523.728	532.246	557.66	1072.23	1025.94	1495.4	1360.91	-0.661289
ENSMUSG00000041926	Rnpep	0.488075	0.123333	-0.365969	0.0178287	1.20149	0.836752	-0.364774	0.00950968	-0.365969	0.0178287	-0.640037	14.1814	transcription_only	713.03	897.819	833.965	894.735	360.805	322.918	459.119	494.008	-0.640037
ENSMUSG00000015143	Actn1	-0.359281	-0.0876337	0.270932	0.0179074	0.580467	0.852114	0.271489	0.00390688	0.270932	0.0179074	0.473309	-166.292	transcription_only	2185.92	2048.15	2074.74	1903.48	1415.62	1375.02	1116.2	1044.43	0.473309
ENSMUSG00000024978	Gpam	0.307195	-0.153512	-0.46187	0.0180785	3.67366	3.21296	-0.460906	2.68732e-05	-0.46187	0.0180785	-0.804964	-26.5523	transcription_only	1340.92	1468.31	1278.07	1229.33	103.181	112.872	136.766	128.583	-0.804964
ENSMUSG00000032878	Ccdc85a	-0.36473	0.043771	0.406789	0.00980431	-1.65433	-1.24583	0.408507	0.0181108	0.408507	0.0181108	0.711645	173.157	transcription_only	427.818	492.553	481.394	458.521	1299.29	1536.85	1119.88	1066.83	0.711645
ENSMUSG00000095742	CAAA01147332.1	1.27493	0.248818	-1.02935	0.0182161	2.20924	1.18313	-1.02608	2.44509e-10	-1.02935	0.0182161	-1.79059	11.0431	transcription_only	510.828	458.262	552.586	594.838	146.557	60.1734	314.662	182.92	-1.79059
ENSMUSG00000021773	Comtd1	0.444475	-0.0790578	-0.526655	0.0182427	1.26683	0.743298	-0.523892	0.00833665	-0.526655	0.0182427	-0.915805	-10.0856	transcription_only	370.35	427.087	308.499	431.257	193.218	130.812	205.651	233.109	-0.915805
ENSMUSG00000025609	Mkln1	-0.377738	-0.120543	0.256669	0.0183405	-0.464621	-0.207426	0.25712	0.00698648	0.256669	0.0183405	0.445728	-162.301	transcription_only	2056.08	1917.22	1759.46	1876.22	2577.88	2828.52	2069.88	2062.31	0.445728
ENSMUSG00000029718	Pcolce	0.531446	0.161635	-0.370597	0.0183639	3.04182	2.67201	-0.369728	3.14135e-05	-0.370597	0.0183639	-0.64337	16.9167	transcription_only	2254.03	2141.67	2532.4	2371.92	302.642	222.754	339.407	416.029	-0.64337
ENSMUSG00000024217	Snrpc	0.333468	-0.340741	-0.679479	0.012165	0.15426	-0.519949	-0.675655	0.0183677	-0.675655	0.0183677	-1.1729	-45.6181	transcription_only	166.019	196.398	155.945	128.882	182.374	135.67	215.348	182.92	-1.1729
ENSMUSG00000028671	Gale	0.359116	-0.0752479	-0.436587	0.0183823	1.14311	0.708742	-0.434544	0.00724627	-0.436587	0.0183823	-0.75774	-11.8343	transcription_only	602.351	508.14	532.246	522.962	284.898	212.289	308.978	325.191	-0.75774
ENSMUSG00000010803	Gabra1	-0.462875	-0.181125	0.281076	0.0187008	0.0582182	0.339969	0.281707	0.00842423	0.281076	0.0187008	0.485738	-158.629	transcription_only	1602.72	1440.25	1325.53	1350.78	1469.84	1414.63	1049.32	1029.49	0.485738
ENSMUSG00000020704	Asic2	-0.329045	0.0210482	0.34875	0.0115666	-2.11816	-1.76807	0.35012	0.0188914	0.35012	0.0188914	0.603514	176.34	transcription_only	608.736	704.538	681.41	639.451	2748.43	2831.89	2366.82	2044.47	0.603514
ENSMUSG00000030551	Nr2f2	-0.315789	-0.0166924	0.29828	0.0147682	-1.52656	-1.22746	0.298927	0.018999	0.298927	0.018999	0.514533	-176.974	transcription_only	887.563	947.697	861.085	934.391	2609.1	2580.73	2056.17	2085.54	0.514533
ENSMUSG00000104318	Pcdha7	-0.374481	0.404085	0.776881	0.00125792	-6.19326	-5.4147	0.779495	0.0191099	0.779495	0.0191099	1.33975	132.822	transcription_only	93.6517	115.345	155.945	118.968	7229.24	7683.13	5828.77	5595.44	1.33975
ENSMUSG00000035933	Cog5	-0.373834	-0.00520744	0.367478	0.0193328	0.546568	0.915195	0.368443	0.00253774	0.367478	0.0193328	0.629749	-179.202	transcription_only	970.572	1006.93	952.618	1001.31	565.853	765.435	486.539	533.413	0.629749
ENSMUSG00000008575	Nfib	-0.322506	0.0604684	0.381625	0.0117298	-2.41501	-2.03204	0.382875	0.0193947	0.382875	0.0193947	0.655604	169.381	transcription_only	508.699	576.724	613.608	513.048	2851.94	2817.68	1994.31	2510.27	0.655604
ENSMUSG00000040481	Bptf	-0.330859	-0.0628199	0.267364	0.0194737	-0.290998	-0.0229586	0.268056	0.00975527	0.267364	0.0194737	0.45734	-169.249	transcription_only	1515.46	1536.89	1505.2	1405.3	1815.2	1857.53	1486.37	1413.58	0.45734
ENSMUSG00000029703	Lrwd1	0.481975	-0.0917244	-0.57748	0.0194834	1.97692	1.40322	-0.574022	0.00352149	-0.57748	0.0194834	-0.987684	-10.7751	transcription_only	351.194	349.152	332.23	322.204	101.209	73.6283	112.355	130.657	-0.987684
ENSMUSG00000038079	Tmem237	-0.454591	-0.0501018	0.402936	0.0120772	-0.988744	-0.584255	0.404092	0.0195637	0.404092	0.0195637	0.69041	-173.711	transcription_only	446.974	483.201	464.444	428.779	871.453	939.601	642.7	669.877	0.69041
ENSMUSG00000018322	Tomm34	-0.461529	-0.193251	0.267655	0.0197337	0.063478	0.331755	0.268282	0.00217788	0.267655	0.0197337	0.456296	-157.28	transcription_only	2422.17	2450.3	2081.52	2151.33	2388.28	2196.89	1794.01	1513.13	0.456296
ENSMUSG00000027333	Smox	0.356521	-0.0883956	-0.447034	0.0104096	-0.781678	-1.22659	-0.444981	0.0198226	-0.444981	0.0198226	-0.757731	-13.9251	transcription_only	368.222	380.326	335.62	361.86	690.064	573.703	807.889	800.119	-0.757731
ENSMUSG00000003528	Slc25a1	0.241008	-0.0210264	-0.262769	0.0199509	-0.198537	-0.460572	-0.26197	0.00702361	-0.262769	0.0199509	-0.446717	-4.98607	transcription_only	1966.69	2023.21	1806.92	2086.89	2454.66	2044.77	2658.08	2625.58	-0.446717
ENSMUSG00000025743	Sdc3	0.407201	0.171655	-0.235905	0.020021	-0.714951	-0.950497	-0.235536	0.00714091	-0.235905	0.020021	-0.400688	22.8578	transcription_only	2390.25	2493.94	2576.48	2875.05	4103.58	3773.73	5456.26	4920.59	-0.400688
ENSMUSG00000018921	Pelp1	0.378491	-0.082792	-0.462501	0.0200513	3.25856	2.79728	-0.461381	0.00011225	-0.462501	0.0200513	-0.785261	-12.3387	transcription_only	1170.65	1097.33	993.299	1132.67	132.098	101.286	156.83	144.76	-0.785261
ENSMUSG00000021143	Pacs2	0.429173	0.168043	-0.26182	0.0200807	-0.834953	-1.09608	-0.261152	0.0131578	-0.26182	0.0200807	-0.444366	21.3828	transcription_only	1336.67	1446.49	1596.74	1509.4	2528.59	2342.28	3462.62	3051.98	-0.444366
ENSMUSG00000029673	Auts2	-0.367279	-0.0609135	0.305199	0.0203702	-1.26253	-0.956161	0.306362	0.0163224	0.305199	0.0203702	0.516092	-170.583	transcription_only	1049.32	904.053	959.398	914.563	2208.86	2425.25	1933.45	1633.42	0.516092
ENSMUSG00000034789	Rab24	0.305233	-0.0683845	-0.375135	0.0122987	-1.14169	-1.51531	-0.373626	0.0205651	-0.373626	0.0205651	-0.630258	-12.628	transcription_only	525.727	539.315	511.905	498.177	1248.03	1060.7	1414.48	1420.22	-0.630258
ENSMUSG00000013629	Cad	0.529144	0.0721359	-0.458064	0.0206026	3.33458	2.87758	-0.457068	0.000136814	-0.458064	0.0206026	-0.772331	7.76302	transcription_only	1072.74	994.459	1125.51	1045.92	107.453	94.5581	138.438	151.396	-0.772331
ENSMUSG00000031232	Magt1	-0.337511	0.0133643	0.349531	0.0206208	0.112299	0.463174	0.350872	0.0148	0.349531	0.0206208	0.589203	177.732	transcription_only	693.874	692.069	742.432	654.322	621.058	640.603	511.953	479.491	0.589203
ENSMUSG00000003363	Pld3	0.352769	0.1172	-0.235659	0.02066	2.07081	1.83524	-0.235545	0.000207644	-0.235659	0.02066	-0.397055	18.378	transcription_only	6806.78	6945.62	7227.69	7589.14	1744.55	1473.69	1956.19	2127.84	-0.397055
ENSMUSG00000042747	Krtcap2	0.456066	0.1358	-0.321432	0.0207785	0.0158974	-0.304368	-0.320171	0.0157684	-0.321432	0.0207785	-0.540774	16.5817	transcription_only	770.498	838.588	830.574	917.042	738.04	823.366	970.738	1156.83	-0.540774
ENSMUSG00000045414	1190002N15Rik	-0.372841	-0.0493329	0.322378	0.0207856	-0.445034	-0.121526	0.32341	0.019404	0.322378	0.0207856	0.542317	-172.463	transcription_only	738.571	854.175	759.382	763.375	1010.78	1112.27	817.587	810.488	0.542317
ENSMUSG00000020593	Lpin1	-0.397243	-0.165979	0.230736	0.020907	-0.412031	-0.180767	0.231129	0.00231199	0.230736	0.020907	0.387569	-157.323	transcription_only	3722.66	3644.27	3288.4	3246.82	4553.44	5097.54	3507.76	3769.97	0.387569
ENSMUSG00000051550	Zfp579	0.565466	-0.106127	-0.677795	0.0209283	1.33642	0.664828	-0.671819	0.0111459	-0.677795	0.0209283	-1.1382	-10.6296	transcription_only	178.79	215.102	166.115	193.322	92.6658	59.4259	125.062	98.7187	-1.1382
ENSMUSG00000025925	Terf1	-0.58169	0.00406454	0.582094	0.0209405	0.214198	0.799952	0.585465	0.0176442	0.582094	0.0209405	0.977343	179.6	transcription_only	210.716	224.455	237.307	198.279	179.088	189.116	130.078	114.066	0.977343
ENSMUSG00000052456	Asna1	0.29238	-0.0410116	-0.334545	0.0211992	1.89417	1.56078	-0.333507	0.00251552	-0.334545	0.0211992	-0.559922	-7.98466	transcription_only	1281.33	1296.85	1291.63	1204.55	342.732	339.363	382.209	447.967	-0.559922
ENSMUSG00000038312	Edem2	0.366609	-0.0843509	-0.453125	0.0170152	0.0552104	-0.39575	-0.451188	0.0212968	-0.451188	0.0212968	-0.754245	-12.9573	transcription_only	395.891	339.799	318.669	371.774	389.065	310.958	432.368	464.973	-0.754245
ENSMUSG00000004535	Tax1bp1	-0.367948	-0.0869383	0.280708	0.0214246	1.70718	1.98819	0.280925	1.76607e-05	0.280708	0.0214246	0.468526	-166.706	transcription_only	6236.35	6091.45	5830.97	5720.36	1565.46	2153.16	1419.83	1440.55	0.468526
ENSMUSG00000020849	Ywhae	-0.277618	-0.0707075	0.206808	0.021507	-0.155773	0.051137	0.206837	0.000320171	0.206808	0.021507	0.344836	-165.711	transcription_only	15201.4	14293.4	14001.1	13944	15289.9	17064.6	13783.3	12722.7	0.344836
ENSMUSG00000055737	Ghr	-0.538132	-0.168484	0.368068	0.0215453	-0.492555	-0.122907	0.369462	0.0177561	0.368068	0.0215453	0.613439	-162.615	transcription_only	640.663	607.898	596.658	515.526	786.673	945.581	558.433	626.324	0.613439
ENSMUSG00000017943	Gdap1l1	0.283418	-0.00202273	-0.286358	0.02156	0.749458	0.464017	-0.285491	0.0118118	-0.286358	0.02156	-0.477172	-0.408908	transcription_only	1362.21	1312.44	1206.88	1440	769.586	797.577	916.567	978.061	-0.477172
ENSMUSG00000038582	Pptc7	-0.311763	0.186887	0.497167	0.00491129	-3.01217	-2.51352	0.498698	0.021603	0.498698	0.021603	0.830574	149.059	transcription_only	259.671	271.216	325.45	277.591	1979.5	2227.91	1633.84	1732.55	0.830574
ENSMUSG00000028700	Pomgnt1	0.2448	-0.235534	-0.482713	0.00905238	-1.25168	-1.73202	-0.480761	0.0216349	-0.480761	0.0216349	-0.800392	-43.8949	transcription_only	340.552	314.86	257.648	294.94	813.619	725.818	840.325	972.669	-0.800392
ENSMUSG00000024176	Sox8	-0.390829	0.228413	0.616432	0.00847227	-1.2782	-0.658957	0.619519	0.0217757	0.619519	0.0217757	1.02966	149.697	transcription_only	146.863	215.102	193.236	220.586	481.073	369.263	324.025	320.628	1.02966
ENSMUSG00000009207	Lnpk	-0.370176	-0.0938332	0.275581	0.0220938	0.563351	0.839694	0.276376	0.00329101	0.275581	0.0220938	0.456288	-165.776	transcription_only	1945.4	1907.86	1776.41	1814.26	1236.2	1331.29	1055	917.088	0.456288
ENSMUSG00000005268	Prlr	-0.630114	0.100655	0.727285	0.00872306	-1.12664	-0.39587	0.730631	0.0220992	0.730631	0.0220992	1.20965	170.924	transcription_only	159.634	99.7576	145.774	136.317	246.123	321.423	176.559	187.482	1.20965
ENSMUSG00000024109	Nrxn1	-0.429207	-0.183353	0.24556	0.0222557	0.668396	0.91425	0.245892	0.00031147	0.24556	0.0222557	0.405802	-156.868	transcription_only	5412.64	5399.38	4796.99	4676.91	2982.39	3713.93	2419.32	2518.57	0.405802
ENSMUSG00000031791	Tmem38a	0.273434	-0.0107955	-0.28532	0.0222916	-0.250058	-0.534288	-0.284413	0.0177008	-0.28532	0.0222916	-0.471308	-2.26093	transcription_only	1045.07	1144.1	1020.42	1127.71	1255.92	1298.03	1428.19	1638.4	-0.471308
ENSMUSG00000042632	Pla2g6	0.415445	0.0154926	-0.401616	0.0223847	2.06507	1.66512	-0.400034	0.00338477	-0.401616	0.0223847	-0.662686	2.13566	transcription_only	787.526	732.595	783.113	750.983	189.603	168.56	231.733	243.064	-0.662686
ENSMUSG00000028419	Chmp5	-0.451404	-0.182726	0.267962	0.0224208	-0.854525	-0.585847	0.268619	0.0118494	0.267962	0.0224208	0.441963	-157.962	transcription_only	1500.56	1437.13	1322.14	1259.07	2585.44	2648	2025.41	1775.28	0.441963
ENSMUSG00000034371	Tkfc	0.580976	0.0493834	-0.534991	0.0225345	1.77124	1.23965	-0.531679	0.00823121	-0.534991	0.0225345	-0.881211	4.8585	transcription_only	317.139	321.095	315.279	339.553	95.9518	87.8307	127.737	145.589	-0.881211
ENSMUSG00000032312	Csk	0.26455	-0.0217819	-0.287366	0.0225986	-0.664109	-0.950441	-0.286353	0.0212818	-0.287366	0.0225986	-0.472981	-4.70687	transcription_only	951.416	950.815	894.986	964.133	1565.13	1399.68	1697.7	1841.23	-0.472981
ENSMUSG00000001418	Glmp	0.428378	0.127557	-0.301725	0.0227096	0.0545582	-0.246263	-0.30081	0.02022	-0.301725	0.0227096	-0.495973	16.5819	transcription_only	808.81	925.875	922.107	951.741	810.333	825.235	1026.92	1159.74	-0.495973
ENSMUSG00000026778	Prkcq	-0.479474	-0.131353	0.347111	0.0227988	1.62116	1.96928	0.347947	0.00185929	0.347111	0.0227988	0.569987	-164.68	transcription_only	1409.03	1371.67	1162.8	1353.26	412.067	478.397	318.006	316.066	0.569987
ENSMUSG00000062044	Lmtk3	0.779372	-0.420093	-1.2241	0.0230336	0.240484	-0.95898	-1.20276	0.00393548	-1.2241	0.0230336	-2.00462	-28.3254	transcription_only	85.1379	87.2879	77.9723	52.0483	94.3088	48.9609	168.533	75.9055	-2.00462
ENSMUSG00000057193	Slc44a2	0.29829	0.0872324	-0.211398	0.0231722	0.144995	-0.0660622	-0.211009	0.00593332	-0.211398	0.0231722	-0.345643	16.3011	transcription_only	3350.18	3563.22	3627.41	3663.21	3081.96	3059.87	3734.82	3767.07	-0.345643
ENSMUSG00000068040	Tm9sf4	0.263211	-0.00198744	-0.266086	0.0232492	0.319039	0.0538406	-0.265282	0.0115807	-0.266086	0.0232492	-0.434676	-0.432618	transcription_only	1619.75	1449.6	1471.3	1581.28	1279.25	1148.9	1413.14	1482.44	-0.434676
ENSMUSG00000039717	Ralyl	-0.551103	-0.145524	0.403803	0.012976	-2.21257	-1.80699	0.405458	0.0233223	0.405458	0.0233223	0.661801	-165.208	transcription_only	461.873	423.97	400.032	399.037	1809.61	2244.73	1388.73	1358.42	0.661801
ENSMUSG00000046879	Irgm1	-0.682595	-0.103861	0.574667	0.0234647	0.275139	0.853873	0.578509	0.0169145	0.574667	0.0234647	0.936468	-171.348	transcription_only	246.9	215.102	216.966	213.15	198.476	179.025	107.005	126.924	0.936468
ENSMUSG00000090639	Gm20425	0.678658	-0.422952	-1.10414	0.00404265	-3.11729	-4.2189	-1.10589	0.0235372	-1.10589	0.0235372	-1.80067	-31.9319	transcription_only	87.2664	43.644	44.0713	54.5268	600.685	542.308	833.303	985.113	-1.80067
ENSMUSG00000022257	Laptm4b	0.221164	-0.0523133	-0.274489	0.0236717	-0.532284	-0.805761	-0.273524	0.0113284	-0.274489	0.0236717	-0.446256	-13.3079	transcription_only	1457.99	1377.9	1430.62	1301.21	1840.5	2203.24	2180.57	2500.32	-0.446256
ENSMUSG00000030609	Aen	0.558293	0.183974	-0.376144	0.0238587	0.892085	0.517766	-0.37445	0.0167123	-0.376144	0.0238587	-0.610238	18.2386	transcription_only	525.727	514.375	583.097	592.359	285.227	266.482	381.875	425.569	-0.610238
ENSMUSG00000030729	Pgm2l1	-0.356322	-0.128382	0.227764	0.0241993	0.0453191	0.273259	0.227934	0.000547876	0.227764	0.0241993	0.368111	-160.186	transcription_only	5989.45	6035.34	5529.25	5413.02	5178.44	6288.68	4384.54	4509.95	0.368111
ENSMUSG00000004891	Nes	0.326336	-0.0337141	-0.361589	0.024207	0.849118	0.489067	-0.360313	0.0159387	-0.361589	0.024207	-0.584349	-5.89835	transcription_only	787.526	695.186	813.624	641.929	440.984	371.505	531.013	481.15	-0.584349
ENSMUSG00000028138	Adh5	0.265298	-0.0632253	-0.329634	0.0243563	1.50032	1.1718	-0.328588	0.00111605	-0.329634	0.0243563	-0.531829	-13.4046	transcription_only	1572.92	1633.53	1532.33	1516.84	487.317	627.148	570.806	759.47	-0.531829
ENSMUSG00000026000	Lancl1	0.310672	0.091665	-0.219426	0.0243719	0.351797	0.132789	-0.21903	0.00404862	-0.219426	0.0243719	-0.353958	16.4389	transcription_only	3401.26	3326.29	3620.63	3516.98	2582.15	2607.64	3014.87	3379.25	-0.353958
ENSMUSG00000039461	Tcta	0.361061	-0.00518307	-0.367622	0.0146531	-0.822611	-1.18886	-0.366492	0.0244342	-0.366492	0.0244342	-0.590786	-0.822432	transcription_only	527.855	545.55	481.394	575.01	884.925	981.087	1130.58	1249.74	-0.590786
ENSMUSG00000031644	Nek1	-0.301011	-0.00253955	0.297413	0.0246272	-0.562229	-0.263758	0.298283	0.0137785	0.297413	0.0246272	0.478414	-179.517	transcription_only	1059.97	1028.75	1098.39	983.961	1518.8	1518.54	1342.92	1104.99	0.478414
ENSMUSG00000015568	Lpl	-0.525269	-0.0448448	0.477661	0.0246801	0.274969	0.755393	0.48026	0.0171324	0.477661	0.0246801	0.767913	-175.12	transcription_only	317.139	405.265	362.741	329.639	255.981	326.655	200.635	201.17	0.767913
ENSMUSG00000023010	Tmbim6	0.307419	0.103514	-0.204322	0.0247448	-1.03427	-1.23817	-0.203862	0.00533169	-0.204322	0.0247448	-0.328247	18.6093	transcription_only	4173.89	4164.88	4271.53	4624.86	8652.42	8149.57	9963.19	10691.9	-0.328247
ENSMUSG00000007987	Ift22	0.463595	-0.0105169	-0.476843	0.02494	1.23414	0.760026	-0.47447	0.0145477	-0.476843	0.02494	-0.764429	-1.29956	transcription_only	340.552	423.97	349.18	396.559	167.916	149.125	190.937	243.893	-0.764429
ENSMUSG00000003868	Ruvbl2	0.488053	-0.0193973	-0.509817	0.025016	2.94918	2.44173	-0.507629	0.00124813	-0.509817	0.025016	-0.816616	-2.27597	transcription_only	655.562	570.489	542.416	659.279	76.2357	80.7295	106.671	111.992	-0.816616
ENSMUSG00000031153	Gripap1	-0.268313	0.0163503	0.283879	0.0250935	0.434095	0.718758	0.284522	0.00585995	0.283879	0.0250935	0.454331	176.513	transcription_only	1549.51	1446.49	1474.69	1541.62	1119.22	1067.05	973.413	829.154	0.454331
ENSMUSG00000070695	Cntnap5a	-0.549196	-0.135757	0.411419	0.0253258	0.00573554	0.419175	0.413037	0.00860813	0.411419	0.0253258	0.656804	-166.115	transcription_only	587.452	570.489	532.246	518.005	462.014	674.988	373.849	397.363	0.656804
ENSMUSG00000043415	Otud1	-0.365127	0.174723	0.537243	0.0137083	-1.08651	-0.546661	0.539635	0.0253502	0.539635	0.0253502	0.861268	154.428	transcription_only	214.973	211.985	213.576	262.72	496.518	395.425	364.487	323.532	0.861268
ENSMUSG00000031503	Col4a2	0.341664	0.0166371	-0.325497	0.0254878	3.30484	2.97982	-0.324977	3.57816e-05	-0.325497	0.0254878	-0.518734	2.78778	transcription_only	3075.61	3139.25	3071.43	3172.47	275.369	343.474	349.105	429.716	-0.518734
ENSMUSG00000035297	Cops4	-0.365296	-0.0841335	0.280414	0.0256619	1.28523	1.56639	0.281067	0.00186523	0.280414	0.0256619	0.446057	-167.03	transcription_only	2134.83	2135.44	1973.04	2029.88	799.817	924.652	645.041	684.394	0.446057
ENSMUSG00000028351	Brinp1	-0.536333	-0.0784016	0.4552	0.0257535	0.255122	0.713054	0.457455	0.0176482	0.4552	0.0257535	0.723388	-171.683	transcription_only	372.478	361.621	359.351	334.596	277.669	328.524	200.635	214.443	0.723388
ENSMUSG00000040387	Klhl32	-0.460402	0.151297	0.607565	0.0258468	-0.195103	0.416595	0.611643	0.025958	0.611643	0.025958	0.9699	161.809	transcription_only	153.248	180.811	200.016	168.537	155.1	219.016	130.078	139.782	0.9699
ENSMUSG00000022103	Gfra2	-0.412653	-0.189841	0.222303	0.0260224	-0.0151055	0.207706	0.22277	0.0040127	0.222303	0.0260224	0.352274	-155.295	transcription_only	3475.76	3556.98	3091.77	3038.63	3489.42	3498.65	2727.96	2485.8	0.352274
ENSMUSG00000037270	4932438A13Rik	-0.341741	-0.0241058	0.317146	0.0260357	2.50076	2.81839	0.317548	0.000424539	0.317146	0.0260357	0.502496	-175.965	transcription_only	3373.59	3080.02	3417.22	2922.14	501.118	623.411	462.463	418.103	0.502496
ENSMUSG00000020311	Erlec1	-0.503803	-0.0919859	0.410493	0.0260645	1.49596	1.90777	0.411757	0.00135262	0.410493	0.0260645	0.6502	-169.653	transcription_only	976.958	888.466	837.355	904.649	285.884	367.394	204.647	253.018	0.6502
ENSMUSG00000070319	Eif3g	0.251443	-0.0434881	-0.295701	0.0260853	1.95843	1.6635	-0.29493	0.00401853	-0.295701	0.0260853	-0.468273	-9.81246	transcription_only	1615.49	1686.53	1491.64	1680.42	414.039	420.84	479.183	508.111	-0.468273
ENSMUSG00000022112	Gpc5	-0.654411	-0.173842	0.478402	0.0182927	-0.399523	0.0810462	0.480162	0.0263877	0.480162	0.0263877	0.757983	-165.123	transcription_only	317.139	314.86	237.307	314.768	410.753	409.627	258.484	259.24	0.757983
ENSMUSG00000026605	Cenpf	0.906533	-0.186193	-1.10946	0.0265184	1.79593	0.703208	-1.09572	0.0220111	-1.10946	0.0265184	-1.74901	-11.6066	transcription_only	78.7526	43.644	57.6317	52.0483	16.7587	18.6874	36.4487	29.4497	-1.74901
ENSMUSG00000021476	Habp4	-0.284317	-0.000567098	0.282627	0.023331	-1.42975	-1.146	0.283789	0.0265929	0.283789	0.0265929	0.447034	-179.886	transcription_only	868.407	928.993	915.327	869.95	2465.17	2286.59	1951.51	1924.6	0.447034
ENSMUSG00000035596	Mboat7	0.392123	0.105777	-0.287059	0.0226543	-0.155144	-0.44149	-0.286354	0.0267208	-0.286354	0.0267208	-0.450478	15.0965	transcription_only	953.545	1184.62	1054.32	1211.98	1142.22	1185.9	1499.41	1535.12	-0.450478
ENSMUSG00000002617	Zfp40	-0.516249	0.00913467	0.521816	0.0267715	-0.0757815	0.449602	0.524964	0.0208348	0.521816	0.0267715	0.820466	178.986	transcription_only	249.028	252.511	254.257	247.849	220.492	299.746	191.941	168.817	0.820466
ENSMUSG00000015837	Sqstm1	0.209797	0.00895561	-0.200957	0.026834	1.10318	0.902336	-0.200901	0.000733978	-0.200957	0.026834	-0.315767	2.44431	transcription_only	18113.1	19396.6	18143.8	19354.5	8240.02	8932.94	9139.58	10586.1	-0.315767
ENSMUSG00000020190	Mknk2	0.545499	0.196972	-0.350269	0.0268487	-0.422396	-0.770923	-0.3485	0.0266667	-0.350269	0.0268487	-0.5503	19.854	transcription_only	500.185	548.667	579.707	609.709	786.673	590.147	1002.84	994.653	-0.5503
ENSMUSG00000022443	Myh9	0.271701	0.0590644	-0.212816	0.0269307	3.19312	2.98049	-0.212567	0.00156266	-0.212816	0.0269307	-0.334068	12.2646	transcription_only	12826	13570.2	14458.8	12893.1	1404.77	1433.7	1739.5	1663.7	-0.334068
ENSMUSG00000006906	Stambp	-0.255228	0.0759616	0.329821	0.0270268	0.113129	0.444318	0.331153	0.0197644	0.329821	0.0270268	0.517227	163.426	transcription_only	704.516	717.008	681.41	800.553	616.129	676.483	546.061	529.265	0.517227
ENSMUSG00000027324	Rpusd2	0.790552	-0.127133	-0.925083	0.0270754	3.7872	2.86951	-0.918399	0.000385401	-0.925083	0.0270754	-1.45	-9.13585	transcription_only	234.129	208.868	159.335	240.414	13.8013	17.9399	27.0857	27.3758	-1.45
ENSMUSG00000028484	Psip1	-0.460756	-0.183047	0.276903	0.0273399	-0.258802	0.0189071	0.277531	0.00992738	0.276903	0.0273399	0.432855	-158.333	transcription_only	1449.47	1399.72	1274.68	1226.85	1707.74	1649.72	1319.17	1103.33	0.432855
ENSMUSG00000052914	Cyp2j6	-0.390646	-0.0891859	0.300793	0.0274777	1.37267	1.67413	0.301456	0.00281678	0.300793	0.0274777	0.469544	-167.14	transcription_only	1915.6	1730.17	1617.08	1791.95	632.23	757.586	519.978	532.583	0.469544
ENSMUSG00000003134	Tbc1d8	-0.635669	-0.168894	0.464337	0.0275416	0.855031	1.32181	0.466405	0.0101944	0.464337	0.0275416	0.724371	-165.121	transcription_only	427.818	430.205	379.691	379.209	226.735	239.946	157.498	140.612	0.724371
ENSMUSG00000062980	Cped1	-0.366504	0.387638	0.750946	0.00590483	-1.94997	-1.19583	0.754551	0.0277656	0.754551	0.0277656	1.17445	133.395	transcription_only	87.2664	102.875	118.653	126.403	363.105	354.313	256.144	296.986	1.17445
ENSMUSG00000103770	Pcdha9	-0.375176	0.118305	0.492333	0.00504824	-4.84982	-4.35634	0.493608	0.027994	0.493608	0.027994	0.76654	162.498	transcription_only	234.129	296.155	301.719	267.677	7227.27	7681.63	5824.76	5591.29	0.76654
ENSMUSG00000019210	Atp6v1e1	-0.259384	-0.0629362	0.196162	0.0281346	0.206393	0.402842	0.196383	0.00230206	0.196162	0.0281346	0.304201	-166.362	transcription_only	6596.06	6409.43	6231	6159.05	5584.59	5511.28	4655.4	4552.26	0.304201
ENSMUSG00000035456	Prdm8	-0.424478	-5.16834e-05	0.422575	0.0282536	1.1794	1.60383	0.424171	0.00699875	0.422575	0.0282536	0.654537	-179.993	transcription_only	570.424	629.72	535.636	646.886	279.312	239.946	198.963	185.409	0.654537
ENSMUSG00000020485	Supt4a	0.50816	-0.312485	-0.827215	0.0118986	-0.663575	-1.48422	-0.823052	0.0283687	-0.823052	0.0283687	-1.27339	-31.5887	transcription_only	104.294	112.227	111.873	64.4408	146.228	190.611	192.609	283.298	-1.27339
ENSMUSG00000003346	Abhd17a	0.569998	0.0390327	-0.534492	0.0283732	-1.62399	-2.15495	-0.531029	0.0032199	-0.534492	0.0283732	-0.826908	3.91742	transcription_only	389.506	436.44	427.153	413.908	1506.64	985.199	1737.83	1939.12	-0.826908
ENSMUSG00000030064	Frmd4b	-0.418735	0.0178562	0.434718	0.0152594	-1.08431	-0.647722	0.436347	0.0286208	0.436347	0.0286208	0.673422	177.558	transcription_only	389.506	392.796	471.224	324.682	744.612	887.651	607.923	604.341	0.673422
ENSMUSG00000039195	1110008P14Rik	0.23278	-0.0471353	-0.280916	0.0287082	-0.84302	-1.12294	-0.280079	0.0177341	-0.280916	0.0287082	-0.433171	-11.447	transcription_only	1070.61	1066.16	1033.98	1023.62	2110.61	1659.07	2185.58	2216.61	-0.433171
ENSMUSG00000022594	Lynx1	0.22058	-0.00853612	-0.229545	0.0290461	-0.784886	-1.014	-0.229176	0.00835278	-0.229545	0.0290461	-0.35279	-2.21615	transcription_only	2581.81	2378.6	2420.53	2490.88	4522.22	3903.05	4620.95	5133.37	-0.35279
ENSMUSG00000025854	Fam20c	0.30078	-0.107603	-0.410677	0.0290914	1.65097	1.24259	-0.40851	0.00749226	-0.410677	0.0290914	-0.630897	-19.6844	transcription_only	595.965	639.072	552.586	582.445	194.532	191.359	206.319	266.291	-0.630897
ENSMUSG00000024393	Prrc2a	0.245543	0.0214086	-0.224648	0.0291261	0.537738	0.313603	-0.224209	0.00234414	-0.224648	0.0291261	-0.344996	4.98294	transcription_only	3741.81	3756.5	3752.84	3811.92	2755.66	2323.96	3121.54	2861.6	-0.344996
ENSMUSG00000061130	Ppm1b	-0.260551	0.189635	0.448788	0.00833593	-3.1011	-2.65091	0.450142	0.0291436	0.450142	0.0291436	0.691174	143.952	transcription_only	289.469	283.686	328.84	322.204	2563.42	2277.99	2071.22	1943.68	0.691174
ENSMUSG00000044433	Camsap3	0.418721	0.0410265	-0.37884	0.0293617	3.14182	2.76412	-0.377804	0.000464747	-0.37884	0.0293617	-0.580466	5.596	transcription_only	1389.88	1340.49	1318.75	1469.75	163.972	140.529	199.297	205.318	-0.580466
ENSMUSG00000039478	Micu3	-0.423059	-0.158229	0.264164	0.0294071	-0.216125	0.0487052	0.264785	0.00638607	0.264164	0.0294071	0.40458	-159.494	transcription_only	1809.18	1914.1	1637.42	1672.98	1894.06	2355.73	1545.22	1601.9	0.40458
ENSMUSG00000067714	Lpar5	0.745764	-0.120841	-0.871751	0.0294174	4.40881	3.54221	-0.86697	9.34456e-06	-0.871751	0.0294174	-1.33499	-9.20398	transcription_only	344.809	392.796	325.45	344.51	13.1441	20.9299	24.745	31.9384	-1.33499
ENSMUSG00000027248	Pdia3	-0.30245	-0.0699498	0.232288	0.02968	2.52358	2.75608	0.232518	9.29351e-05	0.232288	0.02968	0.354829	-166.978	transcription_only	12645.1	11877.4	11750.1	11502.7	1880.26	2320.6	1714.42	1667.43	0.354829
ENSMUSG00000002812	Flii	0.294841	-0.0109739	-0.305914	0.0297349	4.251	3.94519	-0.305914	1.02211e-05	-0.305914	0.0297349	-0.467049	-2.13155	transcription_only	4886.92	4825.78	4874.96	4719.05	252.695	249.29	285.57	326.435	-0.467049
ENSMUSG00000029199	Lias	-0.528605	-0.151594	0.37507	0.0288931	-0.783291	-0.40628	0.376804	0.0297383	0.376804	0.0297383	0.575261	-163.998	transcription_only	470.387	476.966	406.812	438.693	724.239	879.802	514.963	589.408	0.575261
ENSMUSG00000046714	Foxc2	-0.349246	0.193367	0.53935	0.0276915	-0.0679951	0.474618	0.542615	0.0298728	0.542615	0.0298728	0.827338	151.028	transcription_only	189.432	249.394	206.796	282.548	254.667	192.854	177.896	171.306	0.827338
ENSMUSG00000000131	Xpo6	0.292552	0.0261003	-0.267421	0.0300734	0.104117	-0.162334	-0.266405	0.0229963	-0.267421	0.0300734	-0.406966	5.09821	transcription_only	1062.1	1128.51	1139.07	1078.14	993.035	1008	1168.36	1266.34	-0.406966
ENSMUSG00000066233	Tmem42	0.296236	-0.344408	-0.646463	0.0233272	0.580359	-0.0602861	-0.642192	0.0302211	-0.642192	0.0302211	-0.975933	-49.3002	transcription_only	168.147	174.576	108.483	156.145	103.51	121.842	128.406	146.419	-0.975933
ENSMUSG00000036591	Arhgap21	-0.470489	-0.130211	0.339277	0.030491	1.05002	1.3903	0.340103	0.00328771	0.339277	0.030491	0.514286	-164.53	transcription_only	1419.67	1284.38	1328.92	1145.06	560.266	729.182	503.928	419.347	0.514286
ENSMUSG00000024639	Gnaq	-0.367463	-0.156093	0.210986	0.0305703	-2.00045	-1.78908	0.211408	0.00557919	0.210986	0.0305703	0.31958	-156.985	transcription_only	3618.36	3553.87	3193.47	3209.65	13182.5	15071	10615.3	11133.6	0.31958
ENSMUSG00000004393	Ddx56	0.298724	0.00273713	-0.296839	0.030621	1.44342	1.14744	-0.296049	0.00760339	-0.296839	0.030621	-0.449408	0.524972	transcription_only	1219.6	1218.91	1206.88	1221.9	448.87	433.173	502.924	575.306	-0.449408
ENSMUSG00000024640	Psat1	0.367022	0.102152	-0.265751	0.0306466	-0.175567	-0.440436	-0.264915	0.0224925	-0.265751	0.0306466	-0.402245	15.5534	transcription_only	1045.07	1075.51	1125.51	1135.15	1122.18	1232.25	1425.18	1590.7	-0.402245
ENSMUSG00000038608	Dock10	-0.477349	-0.0869463	0.388704	0.0306507	0.41438	0.804782	0.390071	0.0139959	0.388704	0.0306507	0.588327	-169.677	transcription_only	610.865	558.019	589.877	513.048	408.124	457.841	343.754	273.343	0.588327
ENSMUSG00000028086	Fbxw7	-0.400018	-0.144062	0.255263	0.0307191	-0.565387	-0.309431	0.255936	0.0141402	0.255263	0.0307191	0.386109	-160.194	transcription_only	1585.69	1596.12	1505.2	1365.65	2193.75	2438.7	1841.49	1644.2	0.386109
ENSMUSG00000074505	Fat3	-0.295469	0.00437319	0.299326	0.0308848	2.00026	2.30011	0.299699	0.00162805	0.299326	0.0308848	0.452058	179.152	transcription_only	2756.34	2387.95	2732.42	2426.44	567.167	702.645	528.338	498.571	0.452058
ENSMUSG00000046861	Hectd3	0.33752	0.064682	-0.273637	0.0310546	1.19006	0.917217	-0.272924	0.00974911	-0.273637	0.0310546	-0.41261	10.8486	transcription_only	1345.18	1409.08	1396.72	1459.83	605.942	579.683	705.566	783.113	-0.41261
ENSMUSG00000051864	Tbc1d22a	0.248532	-0.0931557	-0.343147	0.0305875	0.301152	-0.0405356	-0.342024	0.0312239	-0.342024	0.0312239	-0.514922	-20.5472	transcription_only	574.681	738.83	579.707	632.015	541.208	498.953	572.812	655.359	-0.514922
ENSMUSG00000071645	Tut1	0.401768	-0.0762187	-0.480817	0.0312902	2.09432	1.61633	-0.478396	0.0059223	-0.480817	0.0312902	-0.723433	-10.7418	transcription_only	442.717	473.849	433.933	428.779	116.982	93.4369	144.791	131.487	-0.723433
ENSMUSG00000045980	Tmem104	0.400302	0.0566025	-0.34479	0.0312903	1.7472	1.4035	-0.34382	0.00346225	-0.34479	0.0312903	-0.518768	8.04824	transcription_only	1079.12	1172.15	1220.44	1107.89	381.836	275.452	452.097	410.222	-0.518768
ENSMUSG00000024941	Scyl1	0.399426	-0.0175348	-0.418281	0.0314982	3.38109	2.96413	-0.416952	0.000173385	-0.418281	0.0314982	-0.628139	-2.51367	transcription_only	1296.22	1209.56	1213.66	1251.64	130.455	106.518	142.116	168.817	-0.628139
ENSMUSG00000049760	2410015M20Rik	0.289347	-0.0459179	-0.336892	0.0315777	0.886308	0.551043	-0.33553	0.0208036	-0.336892	0.0315777	-0.505547	-9.01738	transcription_only	715.159	645.307	647.509	666.714	377.892	348.707	430.696	451.7	-0.505547
ENSMUSG00000038695	Josd2	0.54889	0.12227	-0.429316	0.0289073	-0.802336	-1.22896	-0.426617	0.0320527	-0.426617	0.0320527	-0.637423	12.5581	transcription_only	308.625	336.682	332.23	361.86	675.606	426.446	831.966	771.084	-0.637423
ENSMUSG00000020125	Elane	0.988893	-0.225569	-1.2305	0.0321788	3.72335	2.50889	-1.21666	0.00111552	-1.2305	0.0321788	-1.83644	-12.8495	transcription_only	108.551	90.4053	94.9228	76.8332	5.25763	9.71744	15.7164	13.6879	-1.83644
ENSMUSG00000028797	Tmem234	0.463634	0.125437	-0.3399	0.0323748	0.472212	0.134015	-0.338286	0.0218992	-0.3399	0.0323748	-0.506381	15.139	transcription_only	644.92	592.311	644.119	698.934	461.029	418.971	534.023	672.365	-0.506381
ENSMUSG00000021943	Gdf10	-0.342626	0.247607	0.586043	0.032377	0.553883	1.14412	0.590388	0.012886	0.586043	0.032377	0.873065	144.145	transcription_only	225.615	196.398	250.867	250.328	171.202	112.872	113.693	109.088	0.873065
ENSMUSG00000005514	Por	0.39737	0.0973349	-0.300843	0.0325544	2.02417	1.72413	-0.299955	0.00105735	-0.300843	0.0325544	-0.447471	13.7635	transcription_only	1979.46	2035.68	2054.4	2205.86	560.595	408.88	601.904	667.803	-0.447471
ENSMUSG00000019868	Vta1	-0.295601	0.0477548	0.342177	0.032908	1.02907	1.37243	0.343289	0.00831268	0.342177	0.032908	0.507345	170.823	transcription_only	862.021	860.41	827.184	936.87	380.521	450.366	339.742	332.242	0.507345
ENSMUSG00000044791	Setd2	-0.351502	0.0185754	0.368871	0.0333072	1.57266	1.94274	0.370109	0.00448343	0.368871	0.0333072	0.544993	176.975	transcription_only	1102.54	1000.69	1189.92	946.784	352.59	344.969	305.299	237.257	0.544993
ENSMUSG00000042211	Fbxo38	-0.305443	0.0329085	0.337233	0.0333594	1.21906	1.55741	0.338238	0.00774801	0.337233	0.0333594	0.498019	173.851	transcription_only	991.857	932.11	1057.71	912.085	395.965	418.971	348.436	306.111	0.498019
ENSMUSG00000041936	Agrn	0.367597	0.0187458	-0.350198	0.0334598	0.661256	0.312405	-0.348928	0.0104156	-0.350198	0.0334598	-0.516709	2.9193	transcription_only	1149.36	922.758	1162.8	946.784	714.052	581.925	995.817	664.899	-0.516709
ENSMUSG00000038587	Akap12	-0.270828	-0.0543611	0.216403	0.033598	1.95529	2.17176	0.216458	0.000159023	0.216403	0.033598	0.318911	-168.65	transcription_only	33154.8	32349.5	32663.6	30086.4	7776.04	8848.85	7530.16	6152.49	0.318911
ENSMUSG00000027447	Cst3	0.261175	0.040209	-0.221232	0.0339571	0.107095	-0.11387	-0.22096	0.000872101	-0.221232	0.0339571	-0.325005	8.75222	transcription_only	8609.57	9252.52	8736.29	9495.1	8827.89	7469.72	8626.29	10780.7	-0.325005
ENSMUSG00000028792	Ak2	0.389236	0.0583476	-0.332455	0.0302273	0.124712	-0.206176	-0.330963	0.034153	-0.330963	0.034153	-0.48538	8.52534	transcription_only	587.452	601.663	545.806	676.628	549.423	522.499	660.088	734.998	-0.48538
ENSMUSG00000030852	Tacc2	-0.437264	-0.172969	0.263542	0.0341591	0.982264	1.24656	0.26427	0.00445491	0.263542	0.0341591	0.386482	-158.418	transcription_only	2109.29	2278.84	1884.9	1972.88	1036.74	1144.42	859.051	739.975	0.386482
ENSMUSG00000031239	Itm2a	0.329447	0.062848	-0.267434	0.0342744	0.460023	0.193423	-0.266687	0.0195593	-0.267434	0.0342744	-0.391799	10.8004	transcription_only	1217.47	1100.45	1203.49	1211.98	788.316	875.691	989.464	1087.15	-0.391799
ENSMUSG00000001082	Mfsd10	0.354655	-0.0157312	-0.372394	0.0344207	0.567008	0.196622	-0.370474	0.0317144	-0.372394	0.0344207	-0.54488	-2.53977	transcription_only	438.46	480.084	440.713	458.521	321.701	285.917	402.273	369.573	-0.54488
ENSMUSG00000036144	Meox2	-0.512979	0.200385	0.708929	0.0134378	-1.09113	-0.377764	0.713358	0.0344816	0.713358	0.0344816	1.04322	158.663	transcription_only	104.294	109.11	138.994	106.575	215.563	230.976	151.145	159.692	1.04322
ENSMUSG00000001098	Kctd10	0.295629	0.0789258	-0.217208	0.0345593	-0.0922783	-0.308981	-0.216817	0.0105438	-0.217208	0.0345593	-0.317436	14.948	transcription_only	2390.25	2465.88	2529.01	2565.24	2638.67	2449.17	2926.93	3277.63	-0.317436
ENSMUSG00000025156	Gps1	0.575922	-0.00933718	-0.589398	0.0345778	2.5996	2.01434	-0.585474	0.00556894	-0.589398	0.0345778	-0.861229	-0.928831	transcription_only	340.552	305.508	267.818	366.817	52.5763	52.6984	70.5566	85.4456	-0.861229
ENSMUSG00000039623	Ap5z1	0.405305	-0.000486819	-0.408013	0.0348091	1.39341	0.987618	-0.405738	0.0131981	-0.408013	0.0348091	-0.595008	-0.0688189	transcription_only	498.057	623.485	542.416	562.617	242.837	173.419	274.87	273.343	-0.595008
ENSMUSG00000022867	Usp25	-0.404792	-0.131553	0.27241	0.0348242	-0.151667	0.121572	0.273232	0.013286	0.27241	0.0348242	0.397207	-161.996	transcription_only	1326.02	1284.38	1193.32	1179.76	1293.05	1564.13	1041.29	1101.67	0.397207
ENSMUSG00000023367	Tmem176a	0.292219	0.0171376	-0.275862	0.0348951	0.871531	0.596449	-0.275009	0.00649145	-0.275862	0.0348951	-0.401997	3.35635	transcription_only	1785.77	2119.85	1949.31	1962.96	944.074	1147.78	1117.54	1426.44	-0.401997
ENSMUSG00000067873	Htatsf1	-0.455103	-0.131548	0.322492	0.0349141	0.977773	1.30133	0.323378	0.00943279	0.322492	0.0349141	0.469871	-163.878	transcription_only	1064.22	957.05	922.107	919.52	472.201	541.56	376.525	357.544	0.469871
ENSMUSG00000010110	Stx5a	0.406336	0.0833964	-0.32446	0.0351786	0.590031	0.267091	-0.323086	0.0306444	-0.32446	0.0351786	-0.471674	11.5983	transcription_only	642.791	586.076	678.02	624.58	416.667	389.071	539.039	521.799	-0.471674
ENSMUSG00000096458	Moap1	0.380065	-0.0682731	-0.450646	0.0352219	2.3574	1.90906	-0.448426	0.00246349	-0.450646	0.0352219	-0.654873	-10.1837	transcription_only	689.617	642.19	671.24	599.795	115.997	140.529	134.76	197.023	-0.654873
ENSMUSG00000057969	Sema3b	0.329826	0.0740993	-0.256251	0.035495	2.02017	1.76445	-0.255745	0.00142383	-0.256251	0.035495	-0.371521	12.662	transcription_only	3805.67	3426.05	3654.53	3923.45	955.246	802.062	983.11	1212.41	-0.371521
ENSMUSG00000020994	Pnn	-0.316733	0.0392669	0.354602	0.0355071	0.694284	1.05028	0.355991	0.0167459	0.354602	0.0355071	0.514061	172.933	transcription_only	608.736	654.659	671.24	619.623	372.306	393.93	320.347	290.349	0.514061
ENSMUSG00000029346	Srrd	0.73742	0.137748	-0.605196	0.0355299	1.47387	0.874195	-0.599709	0.0226458	-0.605196	0.0355299	-0.877175	10.5807	transcription_only	185.175	174.576	176.285	215.629	72.621	54.9409	116.368	94.9856	-0.877175
ENSMUSG00000013858	Tmem259	0.465623	-0.00870497	-0.475927	0.0355445	-0.393129	-0.867456	-0.474473	6.20012e-06	-0.475927	0.0355445	-0.689727	-1.07104	transcription_only	1468.63	1396.61	1383.16	1449.92	2250.92	1454.63	2705.89	2380.03	-0.689727
ENSMUSG00000030881	Arfip2	0.286932	-0.0175245	-0.305648	0.0355635	0.917692	0.613236	-0.304578	0.0202335	-0.305648	0.0355635	-0.442883	-3.49503	transcription_only	857.765	816.766	800.064	845.165	424.554	449.245	505.265	553.737	-0.442883
ENSMUSG00000049252	Lrp1b	-0.348548	0.0165707	0.36337	0.036072	-0.332179	0.0329394	0.364877	0.0237612	0.36337	0.036072	0.524282	177.278	transcription_only	581.066	539.315	623.778	513.048	585.897	806.547	525.997	559.544	0.524282
ENSMUSG00000037904	Ankrd9	0.329539	-0.065729	-0.397372	0.0279615	0.166511	-0.228758	-0.395614	0.0361181	-0.395614	0.0361181	-0.570584	-11.28	transcription_only	368.222	395.913	359.351	364.338	343.389	324.413	406.62	427.228	-0.570584
ENSMUSG00000024957	Kcnk4	0.619015	-0.0415102	-0.666638	0.0362163	2.2417	1.58118	-0.661178	0.00851632	-0.666638	0.0362163	-0.96069	-3.83642	transcription_only	219.23	202.633	183.065	223.064	51.2619	36.6273	58.5185	75.9055	-0.96069
ENSMUSG00000027613	Eif6	0.485583	0.217233	-0.269121	0.0283156	-0.74576	-1.01411	-0.268218	0.0363358	-0.268218	0.0363358	-0.386143	24.1021	transcription_only	893.948	1066.16	1040.76	1204.55	1639.4	1576.09	2171.87	2300.81	-0.386143
ENSMUSG00000039745	Htatip2	0.257178	-0.0107127	-0.268774	0.0342681	-0.501246	-0.769137	-0.267888	0.0366722	-0.267888	0.0366722	-0.384596	-2.38526	transcription_only	1057.84	1010.05	901.766	1130.19	1425.15	1458.74	1613.77	1810.12	-0.384596
ENSMUSG00000056596	Trnp1	0.20959	-0.253168	-0.463058	0.0114133	-0.0397862	-0.502544	-0.462782	0.0368092	-0.462782	0.0368092	-0.66365	-50.3797	transcription_only	4001.48	5022.17	3369.76	4153.95	4820.26	4300.71	5237.57	5240.8	-0.66365
ENSMUSG00000024424	Ttc39c	0.329239	0.0604958	-0.269698	0.0368367	1.10828	0.839534	-0.268769	0.0127582	-0.269698	0.0368367	-0.386672	10.4116	transcription_only	1362.21	1262.56	1349.26	1378.04	586.226	614.815	698.543	800.534	-0.386672
ENSMUSG00000071489	Ptgdr	-0.277653	0.0553288	0.331895	0.0371455	1.20642	1.5394	0.332927	0.00797143	0.331895	0.0371455	0.474641	168.73	transcription_only	885.434	947.697	959.398	931.913	370.992	408.88	302.29	336.805	0.474641
ENSMUSG00000006442	Srm	0.377628	0.0235338	-0.35533	0.0371562	2.14194	1.78785	-0.35424	0.00681002	-0.35533	0.0371562	-0.50811	3.56607	transcription_only	817.324	922.758	854.305	894.735	201.104	185.005	239.759	258.825	-0.50811
ENSMUSG00000032826	Ank2	-0.279943	-0.0487247	0.231307	0.0376452	2.41193	2.64314	0.231167	0.000735226	0.231307	0.0376452	0.329449	-170.126	transcription_only	59807.3	54321.1	58431.8	51304.8	9204.47	11907.2	9296.08	7967.18	0.329449
ENSMUSG00000044147	Arf6	0.296835	0.0206052	-0.277524	0.037669	-0.4351	-0.711329	-0.276273	0.0315154	-0.277524	0.037669	-0.395199	3.9709	transcription_only	862.021	928.993	857.695	939.348	1298.96	1076.02	1490.38	1408.61	-0.395199
ENSMUSG00000022125	Cln5	0.49766	0.0961095	-0.403222	0.0243831	-0.135928	-0.537479	-0.401756	0.0376731	-0.401756	0.0376731	-0.572087	10.9306	transcription_only	334.166	430.205	372.911	428.779	387.75	431.305	536.029	612.636	-0.572087
ENSMUSG00000021745	Ptprg	-0.25097	-0.0048095	0.245324	0.0379703	-0.217414	0.0287468	0.246108	0.0167897	0.245324	0.0379703	0.348496	-178.902	transcription_only	1526.1	1568.07	1457.74	1598.63	1649.91	1887.43	1515.8	1435.57	0.348496
ENSMUSG00000018750	Zbtb4	-0.323541	-0.0882152	0.234545	0.0383539	-1.33052	-1.0952	0.235276	0.0279728	0.234545	0.0383539	0.332161	-164.749	transcription_only	1400.52	1530.66	1396.72	1340.86	3438.82	3795.03	2788.15	2952.85	0.332161
ENSMUSG00000011114	Tbrg1	0.378542	0.0253574	-0.354188	0.038477	2.90828	2.5551	-0.353248	0.000316045	-0.354188	0.038477	-0.501105	3.83235	transcription_only	1664.45	1680.29	1644.2	1734.94	188.946	249.663	242.768	323.532	-0.501105
ENSMUSG00000022476	Polr3h	0.512881	0.0890738	-0.425433	0.016961	-0.996314	-1.42012	-0.424055	0.0386008	-0.424055	0.0386008	-0.599361	9.85249	transcription_only	346.937	283.686	315.279	354.424	646.689	600.239	838.988	929.117	-0.599361
ENSMUSG00000047497	Adamts12	-0.5837	0.478345	1.05137	0.0388165	0.922954	1.985	1.06324	0.0113476	1.05137	0.0388165	1.48347	140.665	transcription_only	55.3396	68.5834	74.5822	94.1827	31.5458	32.1423	23.073	19.0801	1.48347
ENSMUSG00000043153	Ispd	-0.312155	0.0729364	0.383404	0.0266715	-0.734503	-0.349412	0.385067	0.038864	0.385067	0.038864	0.543119	166.849	transcription_only	398.02	364.739	427.153	376.731	595.755	657.422	503.259	498.985	0.543119
ENSMUSG00000022048	Dpysl2	-0.306979	-0.121741	0.185108	0.0389692	0.451632	0.63687	0.185225	0.000614886	0.185108	0.0389692	0.260869	-158.368	transcription_only	27488.9	29054.4	25507.1	26145.6	19833.4	20836.4	17447.2	15202.7	0.260869
ENSMUSG00000061665	Cd2ap	-0.442564	-0.121498	0.319518	0.0391192	-0.121037	0.200029	0.320847	0.0234331	0.319518	0.0391192	0.449757	-164.649	transcription_only	717.287	754.417	688.19	656.8	708.466	864.104	542.717	606.415	0.449757
ENSMUSG00000048970	C1galt1c1	-0.285789	0.0175534	0.302286	0.0391268	0.500301	0.803643	0.303139	0.0169722	0.302286	0.0391268	0.425475	176.485	transcription_only	883.306	885.349	901.766	879.864	572.753	657.796	488.88	513.503	0.425475
ENSMUSG00000056342	Usp34	-0.263165	-0.0224709	0.240063	0.03924	0.316923	0.557617	0.240676	0.0181593	0.240063	0.03924	0.337594	-175.12	transcription_only	2360.45	2088.68	2379.85	2002.62	1690.99	1833.23	1527.5	1388.28	0.337594
ENSMUSG00000029463	Fam216a	-0.376329	0.0832385	0.456845	0.0393413	0.305613	0.765181	0.459455	0.0323871	0.456845	0.0393413	0.641936	167.528	transcription_only	291.597	261.864	301.719	285.026	214.577	227.986	162.849	175.869	0.641936
ENSMUSG00000028184	Adgrl2	-0.315171	0.0308391	0.344521	0.0393551	0.962623	1.30863	0.345781	0.0100731	0.344521	0.0393551	0.484052	174.411	transcription_only	815.196	760.652	827.184	780.725	358.505	439.527	332.051	304.452	0.484052
ENSMUSG00000031465	Angpt2	-0.522175	-0.103824	0.416347	0.0394654	1.40295	1.8213	0.418151	0.00985772	0.416347	0.0394654	0.584461	-168.755	transcription_only	664.076	523.728	552.586	555.182	220.821	224.622	163.517	144.345	0.584461
[truncated: 11,063 more rows]

## Sheet: 2-RiboSeq DRG Day63 SNI vs SHM
ensmusg	gene	mRNA_log2FC	RPF_log2FC	log2FC_TE_v1	pvalue_v1	DRG_sham_day63_log2TE	DRG_sni_day63_log2TE	log2FC_TE_v2	pvalue_v2	log2FC_TE_final	pvalue_final	pi_final	angle	category	ribo_DRG_sham_day63_107	ribo_DRG_sham_day63_108	ribo_DRG_sni_day63_105	ribo_DRG_sni_day63_106	mrna_DRG_sham_day63_107	mrna_DRG_sham_day63_108	mrna_DRG_sni_day63_105	mrna_DRG_sni_day63_106	TE_mlog10P
[truncated: 12,776 more rows]

[truncated: 6 more sheets: 3-RiboSeq SC Day4 SNI vs SHM, 4-RiboSeq SC Day63 SNI vs SHM, 5-TRAP TAC1 D60 SNI vs SHM, 6-TRAP TAC1 D4 SNI vs SHM, 7-TRAP GAD2 D60 SNI vs SHM, 8-TRAP GAD2 D4 SNI vs SHM]
