# Supplementary material for: Translational control in the spinal cord regulates gene expression and pain hypersensitivity in the chronic phase of neuropathic pain
Source: bioRxiv preprint, doi:10.1101/2024.06.24.600539, version 2 (2026-01-11)
Supplement: Suppl. table 2 [file 600539_file03.xlsx]

## Sheet: Sheet1
Oligo ID	Target	Full Sequence
1442669	EIF4E	GsCoAoGoCsAsGsTsAsTsCsTsTsTsTsCoCoTsTsG
676630	control	CsCoToAoTsAsGsGsAsCsTsAsTsCsCsAoGoGoAsA
key:	orange: 2'MOE-modified sugar €
	black: DNA
	linkers: are backbone, where o is PO backbone and s is phosphorothioate backbone
